# Supplementary material for: Accurate prediction of molecular properties and drug targets using a self-supervised image representation learning framework
Source: Springer Nature journal article supplement (doi:10.1038/s42256-022-00557-6), 2022-11-17
Supplement: 42256_2022_557_MOESM2_ESM.pdf [file 42256_2022_557_MOESM2_ESM.pdf]

**Table S5:** The ROC-AUC (%) performance of different methods on benchmark datasets with scaffold. All results are reported as mean  $\pm$  standard deviation. The yellow and blue backgrounds represent methods without and with pretraining, respectively. The light green background represents the results of our method. Rank represents the ranking of ImageMol in the comparison. Grover-10M and MPG-10M are our reproduced results based on the 10M pre-training data used by ImageMol.

| Classification (Higher is better) |                                 |                                 |                                 |                                   |                                |                                |                                |                                |
|-----------------------------------|---------------------------------|---------------------------------|---------------------------------|-----------------------------------|--------------------------------|--------------------------------|--------------------------------|--------------------------------|
|                                   | BBBP                            | Tox21                           | ClinTox                         | HIV                               | BACE                           | SIDER                          | MUV                            | ToxCast                        |
| GCN                               | 71.8 $\pm$ 0.9                  | 70.9 $\pm$ 2.6                  | 62.5 $\pm$ 2.8                  | 74.0 $\pm$ 3.0                    | 71.6 $\pm$ 2.0                 | 53.6 $\pm$ 3.2                 | 71.6 $\pm$ 4.0                 | -                              |
| GIN                               | 65.8 $\pm$ 4.5                  | 74.0 $\pm$ 0.8                  | 58.0 $\pm$ 4.4                  | 75.3 $\pm$ 1.9                    | 70.1 $\pm$ 5.4                 | 57.3 $\pm$ 1.6                 | 71.8 $\pm$ 2.5                 | -                              |
| GCC                               | 66.9 $\pm$ 0.7                  | 76.6 $\pm$ 0.5                  | 73.2 $\pm$ 2.6                  | 75.5 $\pm$ 0.8                    | 75.0 $\pm$ 1.5                 | 58.0 $\pm$ 0.9                 | 74.1 $\pm$ 1.4                 | 63.5 $\pm$ 0.4                 |
| GPT-GNN                           | 67.5 $\pm$ 1.3                  | 76.1 $\pm$ 0.4                  | 74.9 $\pm$ 2.7                  | 77.0 $\pm$ 1.7                    | 78.5 $\pm$ 0.9                 | 59.3 $\pm$ 0.8                 | 75.0 $\pm$ 2.5                 | 63.1 $\pm$ 0.5                 |
| Grover                            | 68.0 $\pm$ 1.5                  | 76.3 $\pm$ 0.6                  | 76.9 $\pm$ 1.9                  | 77.8 $\pm$ 1.4                    | 79.5 $\pm$ 1.1                 | 60.7 $\pm$ 0.5                 | 75.8 $\pm$ 1.7                 | 63.4 $\pm$ 0.6                 |
| MGSSL*                            | 70.5 $\pm$ 1.1                  | 76.5 $\pm$ 0.3                  | 80.7 $\pm$ 2.1                  | 79.5 $\pm$ 1.1                    | 79.7 $\pm$ 0.8                 | 61.8 $\pm$ 0.8                 | 78.7 $\pm$ 1.5                 | 64.1 $\pm$ 0.7                 |
| 3D InfoMax                        | 69.1 $\pm$ 1.1                  | 74.5 $\pm$ 0.7                  | 59.4 $\pm$ 3.2                  | 76.1 $\pm$ 1.3                    | 79.4 $\pm$ 1.9                 | 53.4 $\pm$ 3.3                 | -                              | 64.4 $\pm$ 0.9                 |
| G-Motif                           | 66.4 $\pm$ 3.4                  | 73.2 $\pm$ 0.8                  | 77.8 $\pm$ 2.0                  | 73.8 $\pm$ 1.4                    | 73.4 $\pm$ 4.0                 | 60.6 $\pm$ 1.1                 | 73.3 $\pm$ 2.0                 | 62.6 $\pm$ 0.5                 |
| GraphLoG                          | 67.8 $\pm$ 1.7                  | 73.0 $\pm$ 0.3                  | 62.0 $\pm$ 1.8                  | 73.4 $\pm$ 0.6                    | 78.8 $\pm$ 0.7                 | 57.4 $\pm$ 2.3                 | 73.1 $\pm$ 1.7                 | 62.2 $\pm$ 0.4                 |
| GraphCL                           | 67.5 $\pm$ 3.3                  | 74.4 $\pm$ 0.7                  | 78.9 $\pm$ 4.2                  | 75.0 $\pm$ 0.4                    | 68.7 $\pm$ 7.8                 | 60.1 $\pm$ 1.3                 | 77.1 $\pm$ 1.0                 | 62.8 $\pm$ 0.2                 |
| GraphMVP*                         | 72.4 $\pm$ 1.6                  | 75.9 $\pm$ 0.5                  | 79.1 $\pm$ 2.8                  | 77.0 $\pm$ 1.2                    | 81.2 $\pm$ 0.9                 | 63.9 $\pm$ 1.2                 | 77.7 $\pm$ 0.6                 | 63.1 $\pm$ 0.2                 |
| X-MOL                             | 71.6 $\pm$ 1.1                  | 75.1 $\pm$ 0.8                  | 79.6 $\pm$ 1.6                  | 74.1 $\pm$ 0.5                    | 78.1 $\pm$ 1.2                 | 61.3 $\pm$ 0.6                 | 78.1 $\pm$ 0.5                 | 62.1 $\pm$ 0.2                 |
| MolCLR                            | 71.6 $\pm$ 0.7                  | 75.0 $\pm$ 0.4                  | <b>91.9<math>\pm</math>1.2</b>  | 78.3 $\pm$ 0.4                    | 81.9 $\pm$ 1.5                 | 59.9 $\pm$ 0.9                 | 79.7 $\pm$ 1.2                 | -                              |
| Grover-10M                        | 71.8 $\pm$ 0.5                  | 76.5 $\pm$ 0.7                  | 84.3 $\pm$ 2.1                  | 78.6 $\pm$ 0.6                    | 82.2 $\pm$ 0.7                 | 63.7 $\pm$ 0.5                 | 76.9 $\pm$ 1.4                 | 63.5 $\pm$ 0.8                 |
| MPG-10M                           | 72.8 $\pm$ 0.6                  | 77.1 $\pm$ 0.8                  | 90.1 $\pm$ 3.0                  | 78.5 $\pm$ 0.9                    | 83.8 $\pm$ 1.3                 | 64.4 $\pm$ 0.2                 | 79.1 $\pm$ 1.2                 | 63.4 $\pm$ 0.3                 |
| ImageMol                          | <b>73.9<math>\pm</math>0.2</b>  | <b>77.3<math>\pm</math>0.1</b>  | 85.1 $\pm$ 1.4                  | <b>79.7<math>\pm</math>0.2</b>    | <b>83.9<math>\pm</math>0.5</b> | <b>66.0<math>\pm</math>0.1</b> | <b>82.5<math>\pm</math>0.8</b> | <b>65.3<math>\pm</math>0.2</b> |
| Rank                              | 1                               | 1                               | 3                               | 1                                 | 1                              | 1                              | 1                              | 1                              |
| Regression (Lower is better)      |                                 |                                 |                                 |                                   |                                |                                |                                |                                |
|                                   | FreeSolv                        | ESOL                            | Lipo                            | QM9                               |                                |                                |                                |                                |
| GCN                               | 2.87 $\pm$ 0.14                 | 1.43 $\pm$ 0.05                 | 0.85 $\pm$ 0.08                 | 5.796 $\pm$ 1.969                 |                                |                                |                                |                                |
| GIN                               | 2.76 $\pm$ 0.18                 | 1.45 $\pm$ 0.02                 | 0.85 $\pm$ 0.07                 | 4.741 $\pm$ 0.912                 |                                |                                |                                |                                |
| Hu et al.                         | 2.83 $\pm$ 0.12                 | 1.22 $\pm$ 0.02                 | 0.74 $\pm$ 0.00                 | 4.349 $\pm$ 0.061                 |                                |                                |                                |                                |
| N-Gram                            | 2.51 $\pm$ 0.19                 | 1.10 $\pm$ 0.03                 | 0.88 $\pm$ 0.12                 | 7.636 $\pm$ 0.027                 |                                |                                |                                |                                |
| MolCLR                            | 2.47 $\pm$ 0.13                 | 1.21 $\pm$ 0.01                 | 0.69 $\pm$ 0.02                 | 3.916 $\pm$ 0.124                 |                                |                                |                                |                                |
| Grover-10M                        | 2.48 $\pm$ 0.05                 | 0.99 $\pm$ 0.03                 | <b>0.66<math>\pm</math>0.01</b> | 4.983 $\pm$ 0.256                 |                                |                                |                                |                                |
| MPG-10M                           | 2.05 $\pm$ 0.10                 | 1.02 $\pm$ 0.11                 | 0.69 $\pm$ 0.02                 | 4.827 $\pm$ 0.132                 |                                |                                |                                |                                |
| ImageMol                          | <b>2.02<math>\pm</math>0.07</b> | <b>0.97<math>\pm</math>0.07</b> | 0.72 $\pm$ 0.01                 | <b>3.724<math>\pm</math>0.025</b> |                                |                                |                                |                                |
| Rank                              | 1                               | 1                               | 4                               | 1                                 |                                |                                |                                |                                |
