# Supplementary material for: Accurate prediction of molecular properties and drug targets using a self-supervised image representation learning framework
Source: Springer Nature journal article supplement (doi:10.1038/s42256-022-00557-6), 2022-11-17
Supplement: 42256_2022_557_MOESM3_ESM.pdf [file 42256_2022_557_MOESM3_ESM.pdf]

**Table S6:** The ROC-AUC performance of different methods on benchmark datasets with random scaffold split. All results are reported as mean  $\pm$  standard deviation. The yellow and blue backgrounds represent methods without and with pretraining, respectively. The light green background represents the results of our method. Rank represents the ranking of ImageMol in the comparison. Grover-10M and MPG-10M are our reproduced results based on the 10M pre-training data used by ImageMol.

| Classification (Higher is better) |                                   |                                   |                                   |                                   |                                   |                                   |
|-----------------------------------|-----------------------------------|-----------------------------------|-----------------------------------|-----------------------------------|-----------------------------------|-----------------------------------|
|                                   | BBBP                              | SIDER                             | clintox                           | BACE                              | Tox21                             | toxcast                           |
| TF Robust                         | 0.860 $\pm$ 0.087                 | 0.607 $\pm$ 0.033                 | 0.765 $\pm$ 0.085                 | 0.824 $\pm$ 0.022                 | 0.698 $\pm$ 0.012                 | 0.585 $\pm$ 0.031                 |
| GraphConv                         | 0.877 $\pm$ 0.036                 | 0.593 $\pm$ 0.035                 | 0.845 $\pm$ 0.051                 | 0.854 $\pm$ 0.011                 | 0.772 $\pm$ 0.041                 | 0.650 $\pm$ 0.025                 |
| Weave                             | 0.837 $\pm$ 0.065                 | 0.543 $\pm$ 0.034                 | 0.823 $\pm$ 0.023                 | 0.791 $\pm$ 0.008                 | 0.741 $\pm$ 0.044                 | 0.678 $\pm$ 0.024                 |
| SchNet                            | 0.847 $\pm$ 0.024                 | 0.545 $\pm$ 0.038                 | 0.717 $\pm$ 0.042                 | 0.750 $\pm$ 0.033                 | 0.767 $\pm$ 0.025                 | 0.679 $\pm$ 0.021                 |
| MPNN                              | 0.913 $\pm$ 0.041                 | 0.595 $\pm$ 0.030                 | 0.879 $\pm$ 0.054                 | 0.815 $\pm$ 0.044                 | 0.808 $\pm$ 0.024                 | 0.691 $\pm$ 0.013                 |
| DMPNN                             | 0.919 $\pm$ 0.030                 | 0.632 $\pm$ 0.023                 | 0.897 $\pm$ 0.040                 | 0.852 $\pm$ 0.053                 | 0.826 $\pm$ 0.023                 | 0.718 $\pm$ 0.011                 |
| MGCN                              | 0.850 $\pm$ 0.064                 | 0.552 $\pm$ 0.018                 | 0.634 $\pm$ 0.042                 | 0.734 $\pm$ 0.030                 | 0.707 $\pm$ 0.016                 | 0.663 $\pm$ 0.009                 |
| AttentiveFP                       | 0.908 $\pm$ 0.050                 | 0.605 $\pm$ 0.060                 | 0.933 $\pm$ 0.020                 | 0.863 $\pm$ 0.015                 | 0.807 $\pm$ 0.020                 | 0.579 $\pm$ 0.001                 |
| N-GRAM                            | 0.912 $\pm$ 0.013                 | 0.632 $\pm$ 0.005                 | 0.855 $\pm$ 0.037                 | 0.876 $\pm$ 0.035                 | 0.769 $\pm$ 0.027                 | -                                 |
| HU. et.al.                        | 0.915 $\pm$ 0.040                 | 0.614 $\pm$ 0.006                 | 0.762 $\pm$ 0.058                 | 0.851 $\pm$ 0.027                 | 0.811 $\pm$ 0.015                 | 0.714 $\pm$ 0.019                 |
| GROVER <sup>large</sup>           | 0.940 $\pm$ 0.019                 | 0.658 $\pm$ 0.023                 | 0.944 $\pm$ 0.021                 | 0.894 $\pm$ 0.028                 | 0.831 $\pm$ 0.025                 | 0.737 $\pm$ 0.010                 |
| MPG                               | 0.922 $\pm$ 0.012                 | 0.661 $\pm$ 0.007                 | 0.963 $\pm$ 0.028                 | 0.920 $\pm$ 0.013                 | 0.837 $\pm$ 0.019                 | 0.748 $\pm$ 0.005                 |
| GROVER-10M                        | 0.940 $\pm$ 0.004                 | 0.691 $\pm$ 0.009                 | 0.956 $\pm$ 0.004                 | 0.923 $\pm$ 0.005                 | 0.840 $\pm$ 0.002                 | 0.741 $\pm$ 0.004                 |
| MPG-10M                           | 0.943 $\pm$ 0.0178                | 0.671 $\pm$ 0.033                 | 0.964 $\pm$ 0.013                 | 0.859 $\pm$ 0.048                 | 0.832 $\pm$ 0.009                 | 0.750 $\pm$ 0.001                 |
| ImageMol                          | <b>0.952<math>\pm</math>0.002</b> | <b>0.708<math>\pm</math>0.010</b> | <b>0.975<math>\pm</math>0.007</b> | <b>0.939<math>\pm</math>0.010</b> | <b>0.847<math>\pm</math>0.003</b> | <b>0.752<math>\pm</math>0.002</b> |
| Rank                              | 1                                 | 1                                 | 1                                 | 1                                 | 1                                 | 1                                 |
| Regression (Lower is better)      |                                   |                                   |                                   |                                   |                                   |                                   |
|                                   | FreeSolv                          | ESOL                              | Lipo                              | QM7                               |                                   |                                   |
| TF Robust                         | 4.122 $\pm$ 0.085                 | 1.722 $\pm$ 0.038                 | 0.909 $\pm$ 0.060                 | 120.6 $\pm$ 9.6                   |                                   |                                   |
| GraphConv                         | 2.900 $\pm$ 0.135                 | 1.068 $\pm$ 0.050                 | 0.712 $\pm$ 0.049                 | 118.9 $\pm$ 20.2                  |                                   |                                   |
| Weave                             | 2.398 $\pm$ 0.250                 | 1.158 $\pm$ 0.055                 | 0.813 $\pm$ 0.042                 | 94.7 $\pm$ 2.7                    |                                   |                                   |
| SchNet                            | 3.215 $\pm$ 0.755                 | 1.045 $\pm$ 0.064                 | 0.909 $\pm$ 0.098                 | 74.2 $\pm$ 6.0                    |                                   |                                   |
| MPNN                              | 2.185 $\pm$ 0.952                 | 1.167 $\pm$ 0.430                 | 0.672 $\pm$ 0.051                 | 113.0 $\pm$ 17.2                  |                                   |                                   |
| DMPNN                             | 2.177 $\pm$ 0.914                 | 0.980 $\pm$ 0.258                 | 0.653 $\pm$ 0.046                 | 105.8 $\pm$ 13.2                  |                                   |                                   |
| MGCN                              | 3.349 $\pm$ 0.097                 | 1.266 $\pm$ 0.147                 | 1.113 $\pm$ 0.041                 | 77.6 $\pm$ 4.7                    |                                   |                                   |
| AttentiveFP                       | 2.030 $\pm$ 0.420                 | 0.853 $\pm$ 0.060                 | 0.650 $\pm$ 0.030                 | 126.7 $\pm$ 4.0                   |                                   |                                   |
| GROVER                            | 1.544 $\pm$ 0.397                 | 0.831 $\pm$ 0.120                 | 0.560 $\pm$ 0.035                 | 72.6 $\pm$ 3.8                    |                                   |                                   |
| MPG                               | 1.269 $\pm$ 0.192                 | 0.741 $\pm$ 0.017                 | 0.556 $\pm$ 0.017                 | -                                 |                                   |                                   |
| GROVER-10M                        | 1.366 $\pm$ 0.175                 | 0.730 $\pm$ 0.026                 | <b>0.556<math>\pm</math>0.012</b> | 72.1 $\pm$ 1.1                    |                                   |                                   |
| MPG-10M                           | 1.246 $\pm$ 0.131                 | 0.716 $\pm$ 0.062                 | 0.648 $\pm$ 0.003                 | 67.4 $\pm$ 2.9                    |                                   |                                   |
| ImageMol                          | <b>1.149<math>\pm</math>0.004</b> | <b>0.690<math>\pm</math>0.003</b> | 0.625 $\pm$ 0.009                 | <b>65.9<math>\pm</math>2.6</b>    |                                   |                                   |
| Rank                              | 1                                 | 1                                 | 4                                 | 1                                 |                                   |                                   |
