# Supplementary material for: Accurate prediction of molecular properties and drug targets using a self-supervised image representation learning framework
Source: Springer Nature journal article supplement (doi:10.1038/s42256-022-00557-6), 2022-11-17
Supplement: 42256_2022_557_MOESM4_ESM.pdf [file 42256_2022_557_MOESM4_ESM.pdf]

**Table S7:** The comprehensive performance evaluation (including accuracy, auc, aupr, f1, precision, recall and kappa) of ImageMol on molecular property prediction task with scaffold split.

|         | accuracy          | auc               | aupr              | f1                | precision         | recall            | kappa             |
|---------|-------------------|-------------------|-------------------|-------------------|-------------------|-------------------|-------------------|
| BACE    | $0.708 \pm 0.049$ | $0.839 \pm 0.005$ | $0.824 \pm 0.016$ | $0.663 \pm 0.092$ | $0.842 \pm 0.024$ | $0.564 \pm 0.136$ | $0.428 \pm 0.088$ |
| BBBP    | $0.605 \pm 0.006$ | $0.739 \pm 0.002$ | $0.776 \pm 0.006$ | $0.698 \pm 0.004$ | $0.586 \pm 0.008$ | $0.864 \pm 0.029$ | $0.182 \pm 0.016$ |
| ClinTox | $0.922 \pm 0.012$ | $0.851 \pm 0.014$ | $0.719 \pm 0.026$ | $0.700 \pm 0.015$ | $0.710 \pm 0.039$ | $0.697 \pm 0.026$ | $0.322 \pm 0.027$ |
| SIDER   | $0.766 \pm 0.006$ | $0.660 \pm 0.001$ | $0.647 \pm 0.002$ | $0.636 \pm 0.020$ | $0.627 \pm 0.005$ | $0.661 \pm 0.036$ | $0.163 \pm 0.012$ |
| Tox21   | $0.906 \pm 0.002$ | $0.773 \pm 0.001$ | $0.386 \pm 0.006$ | $0.327 \pm 0.038$ | $0.545 \pm 0.038$ | $0.254 \pm 0.044$ | $0.286 \pm 0.031$ |
| ToxCast | $0.802 \pm 0.004$ | $0.653 \pm 0.001$ | $0.332 \pm 0.002$ | $0.259 \pm 0.014$ | $0.331 \pm 0.011$ | $0.256 \pm 0.018$ | $0.102 \pm 0.006$ |
| HIV     | $0.964 \pm 0.011$ | $0.797 \pm 0.002$ | $0.325 \pm 0.026$ | $0.315 \pm 0.018$ | $0.538 \pm 0.182$ | $0.267 \pm 0.095$ | $0.299 \pm 0.015$ |
| MUV     | $0.997 \pm 0.000$ | $0.825 \pm 0.007$ | $0.108 \pm 0.037$ | $0.033 \pm 0.047$ | $0.044 \pm 0.063$ | $0.030 \pm 0.042$ | $0.033 \pm 0.047$ |
