# Supplementary material for: Accurate prediction of molecular properties and drug targets using a self-supervised image representation learning framework
Source: Springer Nature journal article supplement (doi:10.1038/s42256-022-00557-6), 2022-11-17
Supplement: 42256_2022_557_MOESM5_ESM.pdf [file 42256_2022_557_MOESM5_ESM.pdf]

**Table S8:** The comprehensive performance evaluation (including accuracy, AUC, AUPR, F1, precision, recall and kappa) of ImageMol on molecular property prediction task with random scaffold split.

|         | accuracy          | auc               | aupr              | f1                | precision         | recall            | kappa              |
|---------|-------------------|-------------------|-------------------|-------------------|-------------------|-------------------|--------------------|
| BACE    | $0.861 \pm 0.005$ | $0.939 \pm 0.011$ | $0.936 \pm 0.011$ | $0.859 \pm 0.001$ | $0.845 \pm 0.035$ | $0.877 \pm 0.040$ | $0.722 \pm 0.010$  |
| BBBP    | $0.916 \pm 0.007$ | $0.952 \pm 0.002$ | $0.983 \pm 0.001$ | $0.946 \pm 0.005$ | $0.929 \pm 0.014$ | $0.963 \pm 0.016$ | $0.762 \pm 0.023$  |
| ClinTox | $0.982 \pm 0.004$ | $0.975 \pm 0.007$ | $0.582 \pm 0.023$ | $0.495 \pm 0.001$ | $0.497 \pm 0.000$ | $0.494 \pm 0.002$ | $-0.006 \pm 0.004$ |
| SIDER   | $0.769 \pm 0.007$ | $0.708 \pm 0.010$ | $0.698 \pm 0.008$ | $0.633 \pm 0.018$ | $0.648 \pm 0.013$ | $0.659 \pm 0.031$ | $0.160 \pm 0.016$  |
| Tox21   | $0.923 \pm 0.003$ | $0.847 \pm 0.003$ | $0.437 \pm 0.008$ | $0.340 \pm 0.016$ | $0.503 \pm 0.046$ | $0.287 \pm 0.033$ | $0.306 \pm 0.014$  |
| ToxCast | $0.843 \pm 0.001$ | $0.751 \pm 0.001$ | $0.415 \pm 0.003$ | $0.296 \pm 0.015$ | $0.392 \pm 0.010$ | $0.276 \pm 0.019$ | $0.176 \pm 0.013$  |
