# Supplementary material for: Accurate prediction of molecular properties and drug targets using a self-supervised image representation learning framework
Source: Springer Nature journal article supplement (doi:10.1038/s42256-022-00557-6), 2022-11-17
Supplement: 42256_2022_557_MOESM6_ESM.pdf [file 42256_2022_557_MOESM6_ESM.pdf]

**Table S9:** The accuracy and ROC-AUC value of five major CYP Isoforms from PubChem Data Set II. ImageMol\_NonPretrained and ImageMol indicate that ImageMol is not pre-trained and ImageMol is pre-trained on 10M molecular images. "MACCS-" represents the method based on MACCS molecular fingerprint, "FP4-" represents the method based on FP4 molecular fingerprint. "CC-" represents combined algorithm (ensemble learning). For details on other methods, see [1]. ImageMol\_NonPretrained and ImageMol are fine-tuned on PubChem Data Set I and evaluated on PubChem Data Set II. The best and second best result for each dataset is bolded and underlined, respectively. The methods in blue background represent image-based methods. The "3 times" represents the mean  $\pm$  standard deviation of 3 runs with different random seeds.

| ValidationSet          |                                |                                |                                |                                 |                                |                                   |                                   |                                   |                                   |                                   |
|------------------------|--------------------------------|--------------------------------|--------------------------------|---------------------------------|--------------------------------|-----------------------------------|-----------------------------------|-----------------------------------|-----------------------------------|-----------------------------------|
| methods                | accuracy                       |                                |                                |                                 |                                | ROC-AUC                           |                                   |                                   |                                   |                                   |
|                        | 1A2                            | 2C9                            | 2C19                           | 2D6                             | 3A4                            | 1A2                               | 2C9                               | 2C19                              | 2D6                               | 3A4                               |
| MACCS-SVM              | 68.0                           | <u>86.6</u>                    | 80.3                           | <u>87.8</u>                     | 74.9                           | 0.814                             | 0.854                             | 0.841                             | 0.88                              | 0.783                             |
| MACCS-C4.5 DT          | 68.3                           | 78.1                           | 77.5                           | 82.6                            | 70.6                           | -                                 | -                                 | -                                 | -                                 | -                                 |
| MACCS-k-NN             | 69.0                           | 81.5                           | 80.7                           | 84.5                            | 70.4                           | -                                 | -                                 | -                                 | -                                 | -                                 |
| MACCS-NB               | 61.0                           | 69.4                           | 70.5                           | 80.6                            | 69.3                           | -                                 | -                                 | -                                 | -                                 | -                                 |
| MACCS-CC-I             | 71.3                           | 86.5                           | 80.6                           | 87.5                            | 75.1                           | 0.809                             | 0.857                             | 0.838                             | 0.88                              | 0.78                              |
| MACCS-CC-II            | 72.0                           | <b>86.7</b>                    | 80.8                           | 87.5                            | 74.9                           | 0.806                             | <u>0.861</u>                      | 0.842                             | 0.88                              | 0.777                             |
| MACCS-CC-III           | 72.3                           | 86.3                           | 80.5                           | 87.5                            | 74.6                           | 0.814                             | 0.85                              | 0.839                             | 0.872                             | 0.775                             |
| MACCS-CC-IV            | <u>73.1</u>                    | 86.4                           | 80.4                           | 87.6                            | 75.0                           | 0.815                             | 0.853                             | 0.829                             | 0.886                             | 0.785                             |
| MACCS-CC-V             | 69.9                           | 83.6                           | 80.4                           | 86.2                            | 74.2                           | 0.776                             | 0.837                             | 0.829                             | 0.86                              | 0.754                             |
| MACCS-Mean             | 68.1                           | 84.0                           | 76.6                           | 87.2                            | 73.6                           | 0.801                             | 0.845                             | 0.756                             | <u>0.881</u>                      | 0.778                             |
| MACCS-Maximum          | 67.0                           | 81.5                           | 79.7                           | 86.0                            | 72.8                           | 0.789                             | 0.813                             | 0.67                              | 0.874                             | 0.765                             |
| MACCS-Multiply         | 67.1                           | 82.7                           | 79.5                           | 86.8                            | 73.7                           | 0.795                             | 0.829                             | 0.704                             | 0.879                             | 0.772                             |
| FP4-SVM                | 67.6                           | 84.2                           | 80.5                           | 86.4                            | 75.6                           | 0.803                             | 0.832                             | 0.82                              | 0.848                             | 0.785                             |
| FP4-C4.5 DT            | 65.8                           | 78.8                           | 77.2                           | 78.5                            | 72.0                           | -                                 | -                                 | -                                 | -                                 | -                                 |
| FP4-k-NN               | 69.7                           | 78.4                           | 77.9                           | 81.1                            | 66.3                           | -                                 | -                                 | -                                 | -                                 | -                                 |
| FP4-NB                 | 59.7                           | 75.4                           | 73.5                           | 80.2                            | 70.9                           | -                                 | -                                 | -                                 | -                                 | -                                 |
| FP4-CC-I               | 70.7                           | 84.5                           | 80.2                           | 85.6                            | <u>75.8</u>                    | 0.805                             | 0.842                             | 0.798                             | 0.86                              | 0.79                              |
| FP4-CC-II              | 71.2                           | 84.6                           | 81.0                           | 86.1                            | <u>75.8</u>                    | 0.798                             | 0.85                              | 0.815                             | 0.86                              | 0.783                             |
| FP4-CC-III             | 70.8                           | 84.6                           | 80.7                           | 85.8                            | <b>76.0</b>                    | 0.794                             | 0.827                             | 0.812                             | 0.839                             | 0.787                             |
| FP4-CC-IV              | 71.7                           | 84.1                           | 80.7                           | 85.6                            | 75.4                           | 0.805                             | 0.837                             | 0.793                             | 0.842                             | 0.792                             |
| FP4-CC-V               | 70.2                           | 83.2                           | 79.0                           | 84.5                            | 75.0                           | 0.764                             | 0.844                             | 0.819                             | 0.841                             | 0.777                             |
| FP4-Mean               | 67.2                           | 81.9                           | 77.5                           | 85.6                            | 74.8                           | 0.782                             | 0.848                             | 0.774                             | 0.856                             | <u>0.79</u>                       |
| FP4-Maximum            | 66.5                           | 80.0                           | 78.1                           | 83.9                            | 74.0                           | 0.772                             | 0.836                             | 0.674                             | 0.843                             | 0.784                             |
| FP4-Multiply           | 67.3                           | 81.1                           | 77.9                           | 85.2                            | 73.9                           | 0.778                             | 0.842                             | 0.729                             | 0.851                             | 0.788                             |
| Chemception            | 65.1                           | 66.7                           | 67.1                           | 68.1                            | 69.3                           | 0.699                             | 0.733                             | 0.738                             | 0.753                             | 0.763                             |
| ADMET-CNN              | 62.5                           | 73.3                           | 76.4                           | 81.0                            | 70.5                           | 0.556                             | 0.697                             | 0.616                             | 0.559                             | 0.654                             |
| QSAR-CNN               | 55.6                           | 64.1                           | 60.1                           | 82.1                            | 60.0                           | 0.712                             | 0.736                             | 0.752                             | 0.761                             | 0.734                             |
| ImageMol_NonPretrained | <b>73.3</b>                    | 84.3                           | <u>82.2</u>                    | 85.7                            | 74.2                           | <u>0.837</u>                      | 0.841                             | <u>0.848</u>                      | 0.83                              | 0.763                             |
| ImageMol               | 71.9                           | 85.0                           | <b>82.9</b>                    | <b>88.3</b>                     | 74.6                           | <b>0.852</b>                      | <b>0.870</b>                      | <b>0.871</b>                      | <b>0.893</b>                      | <b>0.799</b>                      |
| Chemception (3 times)  | 64.8 $\pm$ 0.4                 | 67.1 $\pm$ 0.4                 | 65.9 $\pm$ 1.2                 | 67.5 $\pm$ 0.7                  | 69.2 $\pm$ 0.2                 | 0.690 $\pm$ 0.010                 | 0.727 $\pm$ 0.005                 | 0.728 $\pm$ 0.007                 | 0.744 $\pm$ 0.09                  | 0.761 $\pm$ 0.002                 |
| ADMET-CNN (3 times)    | 62.2 $\pm$ 0.4                 | 76.4 $\pm$ 0.0                 | 73.3 $\pm$ 0.0                 | 81.1 $\pm$ 0.1                  | 70.5 $\pm$ 0.0                 | 0.546 $\pm$ 0.008                 | 0.668 $\pm$ 0.020                 | 0.603 $\pm$ 0.009                 | 0.565 $\pm$ 0.005                 | 0.652 $\pm$ 0.003                 |
| QSAR-CNN (3 times)     | 55.9 $\pm$ 2.0                 | 64.1 $\pm$ 0.1                 | 59.9 $\pm$ 0.4                 | 81.6 $\pm$ 0.8                  | 58.8 $\pm$ 1.7                 | 0.710 $\pm$ 0.003                 | 0.734 $\pm$ 0.009                 | 0.735 $\pm$ 0.007                 | 0.759 $\pm$ 0.008                 | 0.734 $\pm$ 0.003                 |
| ImageMol (3 times)     | <b>74.0<math>\pm</math>0.8</b> | <b>84.7<math>\pm</math>0.4</b> | <b>83.1<math>\pm</math>0.2</b> | <b>88.3<math>\pm</math>0.03</b> | <b>75.6<math>\pm</math>0.3</b> | <b>0.845<math>\pm</math>0.001</b> | <b>0.874<math>\pm</math>0.004</b> | <b>0.868<math>\pm</math>0.003</b> | <b>0.890<math>\pm</math>0.003</b> | <b>0.796<math>\pm</math>0.001</b> |

[1] Cheng F, Yu Y, Shen J, et al. Classification of cytochrome P450 inhibitors and noninhibitors using combined classifiers[J]. Journal of chemical information and modeling, 2011, 51(5): 996-1011.
