# Supplementary material for: Accurate prediction of molecular properties and drug targets using a self-supervised image representation learning framework
Source: Springer Nature journal article supplement (doi:10.1038/s42256-022-00557-6), 2022-11-17
Supplement: 42256_2022_557_MOESM7_ESM.pdf [file 42256_2022_557_MOESM7_ESM.pdf]

Table S10: The performance of different methods on CYP450 datasets with balanced scaffold split.

| CYP1A2                |                    |                    |                    |                    |                    |                    |                    |
|-----------------------|--------------------|--------------------|--------------------|--------------------|--------------------|--------------------|--------------------|
|                       | accuracy           | auc                | aupr               | f1                 | precision          | recall             | kappa              |
| Mo1CLR <sub>GIN</sub> | 0.831±0.005        | 0.900±0.003        | 0.893±0.007        | 0.829±0.004        | <b>0.818±0.008</b> | 0.841±0.006        | 0.661±0.009        |
| Mo1CLR <sub>RGN</sub> | 0.814±0.007        | 0.885±0.001        | 0.871±0.002        | 0.803±0.009        | 0.825±0.004        | 0.782±0.018        | 0.626±0.014        |
| RNN LR                | 0.722±0.000        | 0.790±0.000        | 0.759±0.000        | 0.707±0.000        | 0.724±0.000        | 0.691±0.000        | 0.443±0.000        |
| TRFM LR               | 0.791±0.000        | 0.868±0.000        | 0.869±0.000        | 0.778±0.000        | 0.804±0.000        | 0.754±0.000        | 0.581±0.000        |
| RNN MLP               | 0.681±0.023        | 0.771±0.007        | 0.739±0.007        | 0.631±0.061        | 0.715±0.017        | 0.576±0.115        | 0.357±0.050        |
| TRFM MLP              | 0.774±0.004        | 0.850±0.002        | 0.857±0.003        | 0.754±0.011        | 0.803±0.022        | 0.712±0.037        | 0.546±0.008        |
| RNN RF                | 0.780±0.003        | 0.855±0.002        | 0.856±0.002        | 0.764±0.004        | 0.797±0.003        | 0.733±0.004        | 0.558±0.006        |
| TRFM RF               | 0.790±0.004        | 0.871±0.000        | 0.871±0.000        | 0.778±0.004        | 0.799±0.005        | 0.758±0.004        | 0.578±0.007        |
| CHEM-BERT             | 0.794±0.006        | 0.874±0.004        | 0.871±0.007        | 0.772±0.008        | 0.834±0.021        | 0.720±0.022        | 0.586±0.013        |
| GROVER                | 0.809±0.001        | 0.884±0.000        | 0.882±0.000        | 0.798±0.002        | 0.823±0.006        | 0.774±0.007        | 0.618±0.002        |
| ImageMol              | <b>0.834±0.006</b> | <b>0.905±0.002</b> | <b>0.903±0.002</b> | <b>0.834±0.004</b> | 0.811±0.015        | <b>0.859±0.010</b> | <b>0.668±0.011</b> |
| CYP2C9                |                    |                    |                    |                    |                    |                    |                    |
|                       | accuracy           | auc                | aupr               | f1                 | precision          | recall             | kappa              |
| Mo1CLR <sub>GIN</sub> | 0.779±0.007        | 0.838±0.008        | 0.724±0.016        | 0.706±0.012        | 0.694±0.016        | 0.719±0.031        | 0.529±0.016        |
| Mo1CLR <sub>RGN</sub> | 0.757±0.003        | 0.818±0.002        | 0.714±0.002        | 0.651±0.016        | 0.690±0.012        | 0.617±0.036        | 0.465±0.013        |
| RNN LR                | 0.698±0.000        | 0.743±0.000        | 0.615±0.000        | 0.522±0.000        | 0.627±0.000        | 0.447±0.000        | 0.310±0.000        |
| TRFM LR               | 0.720±0.000        | 0.780±0.000        | 0.682±0.000        | 0.603±0.000        | 0.630±0.000        | 0.579±0.000        | 0.387±0.000        |
| RNN MLP               | 0.653±0.012        | 0.729±0.007        | 0.578±0.009        | 0.401±0.157        | 0.587±0.058        | 0.393±0.285        | 0.199±0.078        |
| TRFM MLP              | 0.727±0.008        | 0.776±0.006        | 0.668±0.004        | 0.625±0.012        | 0.634±0.014        | 0.616±0.019        | 0.411±0.017        |
| RNN RF                | 0.719±0.001        | 0.763±0.000        | 0.623±0.002        | 0.603±0.003        | 0.628±0.001        | 0.580±0.005        | 0.386±0.003        |
| TRFM RF               | 0.735±0.001        | 0.798±0.001        | 0.691±0.002        | 0.614±0.001        | 0.664±0.003        | 0.571±0.001        | 0.414±0.002        |
| CHEM-BERT             | 0.752±0.006        | 0.822±0.003        | 0.711±0.002        | 0.649±0.019        | 0.681±0.033        | 0.627±0.065        | 0.458±0.009        |
| GROVER                | 0.745±0.005        | 0.814±0.002        | 0.725±0.003        | 0.595±0.024        | <b>0.719±0.013</b> | 0.509±0.039        | 0.417±0.019        |
| ImageMol              | <b>0.785±0.001</b> | <b>0.859±0.001</b> | <b>0.776±0.004</b> | <b>0.711±0.001</b> | 0.703±0.005        | <b>0.719±0.006</b> | <b>0.539±0.002</b> |
| CYP2C19               |                    |                    |                    |                    |                    |                    |                    |
|                       | accuracy           | auc                | aupr               | f1                 | precision          | recall             | kappa              |
| Mo1CLR <sub>GIN</sub> | 0.789±0.010        | 0.865±0.000        | 0.833±0.002        | 0.787±0.006        | 0.741±0.019        | 0.840±0.012        | 0.579±0.020        |
| Mo1CLR <sub>RGN</sub> | 0.792±0.001        | 0.862±0.001        | 0.837±0.002        | 0.785±0.002        | 0.755±0.009        | 0.819±0.015        | 0.584±0.002        |
| RNN LR                | 0.692±0.000        | 0.751±0.000        | 0.692±0.000        | 0.662±0.000        | 0.677±0.000        | 0.648±0.000        | 0.380±0.000        |
| TRFM LR               | 0.729±0.000        | 0.816±0.000        | 0.785±0.000        | 0.708±0.000        | 0.709±0.000        | 0.708±0.000        | 0.455±0.000        |
| RNN MLP               | 0.667±0.014        | 0.739±0.006        | 0.684±0.002        | 0.624±0.058        | 0.660±0.039        | 0.613±0.124        | 0.327±0.033        |
| TRFM MLP              | 0.725±0.010        | 0.789±0.005        | 0.755±0.004        | 0.696±0.016        | 0.716±0.007        | 0.678±0.026        | 0.445±0.022        |
| RNN RF                | 0.715±0.003        | 0.790±0.001        | 0.734±0.001        | 0.696±0.002        | 0.691±0.004        | 0.701±0.002        | 0.428±0.005        |
| TRFM RF               | 0.747±0.003        | 0.824±0.001        | 0.792±0.001        | 0.728±0.003        | 0.728±0.005        | 0.727±0.006        | 0.491±0.006        |
| CHEM-BERT             | 0.780±0.006        | 0.855±0.001        | 0.821±0.007        | 0.771±0.011        | 0.747±0.012        | 0.798±0.031        | 0.560±0.014        |
| GROVER                | 0.759±0.001        | 0.838±0.000        | 0.798±0.001        | 0.737±0.001        | 0.749±0.002        | 0.725±0.004        | 0.514±0.002        |
| ImageMol              | <b>0.793±0.001</b> | <b>0.871±0.001</b> | <b>0.847±0.002</b> | <b>0.791±0.004</b> | 0.749±0.008        | 0.838±0.020        | <b>0.588±0.002</b> |
| CYP2D6                |                    |                    |                    |                    |                    |                    |                    |
|                       | accuracy           | auc                | aupr               | f1                 | precision          | recall             | kappa              |
| Mo1CLR <sub>GIN</sub> | 0.812±0.004        | 0.823±0.001        | 0.621±0.002        | <b>0.583±0.003</b> | 0.576±0.012        | <b>0.591±0.016</b> | 0.452±0.003        |
| Mo1CLR <sub>RGN</sub> | 0.816±0.003        | 0.819±0.001        | 0.623±0.004        | 0.505±0.015        | 0.680±0.023        | 0.403±0.024        | 0.408±0.014        |
| RNN LR                | 0.787±0.000        | 0.670±0.000        | 0.387±0.000        | 0.206±0.000        | 0.582±0.000        | 0.125±0.000        | 0.139±0.000        |
| TRFM LR               | 0.798±0.000        | 0.754±0.000        | 0.504±0.000        | 0.392±0.000        | 0.586±0.000        | 0.294±0.000        | 0.286±0.000        |
| RNN MLP               | 0.780±0.004        | 0.670±0.007        | 0.369±0.016        | 0.204±0.014        | 0.515±0.046        | 0.128±0.013        | 0.127±0.006        |
| TRFM MLP              | 0.782±0.007        | 0.721±0.003        | 0.465±0.010        | 0.448±0.002        | 0.511±0.021        | 0.400±0.012        | 0.316±0.008        |
| RNN RF                | 0.803±0.002        | 0.727±0.001        | 0.478±0.002        | 0.398±0.002        | 0.611±0.010        | 0.295±0.002        | 0.297±0.003        |
| TRFM RF               | 0.806±0.002        | 0.769±0.001        | 0.531±0.002        | 0.315±0.011        | 0.719±0.014        | 0.201±0.008        | 0.241±0.011        |
| CHEM-BERT             | 0.813±0.011        | 0.780±0.014        | 0.550±0.032        | 0.483±0.012        | 0.632±0.064        | 0.395±0.030        | 0.376±0.016        |
| GROVER                | 0.807±0.003        | 0.789±0.003        | 0.534±0.012        | 0.331±0.031        | <b>0.706±0.006</b> | 0.217±0.027        | 0.254±0.027        |
| ImageMol              | <b>0.818±0.009</b> | <b>0.827±0.002</b> | <b>0.626±0.002</b> | 0.568±0.015        | 0.603±0.036        | 0.544±0.06         | <b>0.454±0.008</b> |
| CYP3A4                |                    |                    |                    |                    |                    |                    |                    |
|                       | accuracy           | auc                | aupr               | f1                 | precision          | recall             | kappa              |
| Mo1CLR <sub>GIN</sub> | 0.833±0.003        | 0.898±0.001        | 0.821±0.006        | 0.746±0.010        | 0.749±0.015        | 0.745±0.033        | 0.622±0.009        |
| Mo1CLR <sub>RGN</sub> | 0.810±0.004        | 0.874±0.001        | 0.770±0.003        | 0.686±0.011        | 0.755±0.001        | 0.629±0.018        | 0.551±0.012        |
| RNN LR                | 0.775±0.000        | 0.826±0.000        | 0.674±0.000        | 0.635±0.000        | 0.685±0.000        | 0.591±0.000        | 0.474±0.000        |
| TRFM LR               | 0.806±0.000        | 0.867±0.000        | 0.782±0.000        | 0.707±0.000        | 0.704±0.000        | 0.711±0.000        | 0.562±0.000        |
| RNN MLP               | 0.757±0.003        | 0.812±0.006        | 0.655±0.007        | 0.610±0.035        | 0.652±0.028        | 0.582±0.090        | 0.436±0.026        |
| TRFM MLP              | 0.782±0.005        | 0.844±0.004        | 0.713±0.015        | 0.667±0.004        | 0.673±0.014        | 0.662±0.010        | 0.506±0.009        |
| RNN RF                | 0.779±0.004        | 0.837±0.000        | 0.713±0.001        | 0.654±0.007        | 0.675±0.004        | 0.635±0.010        | 0.492±0.010        |
| TRFM RF               | 0.810±0.004        | 0.862±0.001        | 0.773±0.004        | 0.697±0.007        | 0.732±0.007        | 0.666±0.007        | 0.559±0.010        |
| CHEM-BERT             | 0.827±0.004        | 0.892±0.004        | 0.808±0.009        | 0.745±0.014        | 0.729±0.025        | 0.766±0.053        | 0.615±0.013        |
| GROVER                | 0.826±0.003        | 0.891±0.001        | 0.817±0.002        | 0.720±0.004        | 0.768±0.013        | 0.678±0.013        | 0.594±0.005        |
| ImageMol              | <b>0.845±0.004</b> | <b>0.903±0.001</b> | <b>0.833±0.001</b> | <b>0.765±0.002</b> | <b>0.769±0.025</b> | <b>0.763±0.029</b> | <b>0.65±0.003</b>  |
