# Supplementary material for: Accurate prediction of molecular properties and drug targets using a self-supervised image representation learning framework
Source: Springer Nature journal article supplement (doi:10.1038/s42256-022-00557-6), 2022-11-17
Supplement: 42256_2022_557_MOESM8_ESM.pdf [file 42256_2022_557_MOESM8_ESM.pdf]

**Table S11:** The performance of different methods on multi-labeled CYP450 dataset with balanced scaffold split, which evaluates the performance of the model on 5 tasks (CYP1A2, CYP2C9, CYP2C19, CYP2D6 and CYP3A4) simultaneously. SS represents the p-values (one-sided significance level) of the McNemar’s test between ImageMol and other comparison methods. The numbers in green background indicate statistically different models, using a significance threshold of 0.05. 0 indicates statistical significance less than E-100.

| multi-labeled CYP450  |                    |                    |                    |                    |                    |                    |                    |          |
|-----------------------|--------------------|--------------------|--------------------|--------------------|--------------------|--------------------|--------------------|----------|
|                       | accuracy           | auc                | aupr               | f1                 | precision          | recall             | kappa              | SS       |
| MolCLR <sub>GIN</sub> | 0.810±0.002        | 0.861±0.003        | 0.732±0.005        | 0.664±0.012        | <b>0.725±0.018</b> | 0.625±0.027        | 0.528±0.008        | 7.98E-05 |
| MolCLR <sub>GCN</sub> | 0.806±0.002        | 0.843±0.003        | 0.712±0.001        | 0.657±0.007        | 0.730±0.007        | 0.608±0.015        | 0.519±0.007        | 2.30E-05 |
| RNN LR                | 0.737±0.000        | 0.702±0.000        | 0.473±0.000        | 0.434±0.001        | 0.492±0.001        | 0.396±0.001        | 0.259±0.000        | 0        |
| TRFM LR               | 0.783±0.000        | 0.775±0.000        | 0.595±0.000        | 0.544±0.000        | 0.607±0.000        | 0.502±0.000        | 0.399±0.000        | 2.16E-49 |
| RNN MLP               | 0.735±0.001        | 0.707±0.000        | 0.470±0.000        | 0.385±0.001        | 0.500±0.003        | 0.336±0.002        | 0.220±0.001        | 0        |
| TRFM MLP              | 0.711±0.016        | 0.769±0.001        | 0.553±0.002        | 0.470±0.005        | 0.317±0.004        | <b>0.935±0.009</b> | 0.204±0.010        | 0        |
| RNN RF                | 0.784±0.002        | 0.794±0.001        | 0.586±0.001        | 0.523±0.002        | 0.609±0.005        | 0.521±0.001        | 0.382±0.003        | 5.42E-44 |
| TRFM RF               | 0.816±0.000        | 0.820±0.000        | 0.656±0.001        | 0.553±0.001        | 0.669±0.003        | 0.533±0.001        | 0.442±0.001        | 7.29E-16 |
| CHEM-BERT             | 0.816±0.003        | 0.831±0.004        | 0.672±0.010        | 0.616±0.014        | 0.673±0.030        | 0.597±0.047        | 0.493±0.008        | 7.35E-16 |
| ImageMol              | <b>0.843±0.003</b> | <b>0.866±0.007</b> | <b>0.736±0.009</b> | <b>0.681±0.007</b> | 0.714±0.020        | 0.661±0.025        | <b>0.575±0.005</b> | -        |
