# Supplementary material for: Accurate prediction of molecular properties and drug targets using a self-supervised image representation learning framework
Source: Springer Nature journal article supplement (doi:10.1038/s42256-022-00557-6), 2022-11-17
Supplement: 42256_2022_557_MOESM9_ESM.pdf [file 42256_2022_557_MOESM9_ESM.pdf]

**Table S12:** The performance of different methods on 10 G protein coupled receptors (GPCRs) datasets with balanced scaffold split.

|                      | 1. 5HT1A           |                    | 2. 5HT2A           |                    | 3. AA1R            |                    |
|----------------------|--------------------|--------------------|--------------------|--------------------|--------------------|--------------------|
|                      | RMSE               | MAE                | RMSE               | MAE                | RMSE               | MAE                |
| MoCLR <sub>GIN</sub> | 0.850±0.021        | 0.670±0.012        | 0.853±0.019        | 0.642±0.014        | 0.786±0.015        | 0.588±0.009        |
| MoCLR <sub>GCN</sub> | 0.949±0.027        | 0.764±0.014        | 0.875±0.008        | 0.681±0.024        | 0.856±0.026        | 0.662±0.026        |
| RNN LR               | 1.574±0.091        | 0.937±0.019        | 1.602±0.245        | 1.103±0.151        | 1.073±0.087        | 0.762±0.057        |
| TRFM LR              | 1.636±0.004        | 1.109±0.001        | 1.389±0.000        | 0.999±0.001        | 1.060±0.003        | 0.810±0.001        |
| RNN MLP              | 0.957±0.013        | 0.768±0.010        | 1.167±0.010        | 0.890±0.003        | 0.848±0.004        | 0.662±0.008        |
| TRFM MLP             | 0.939±0.034        | 0.730±0.025        | 1.013±0.026        | 0.728±0.021        | 0.878±0.051        | 0.657±0.031        |
| RNN RF               | 0.788±0.004        | <b>0.617±0.004</b> | 1.001±0.001        | 0.747±0.001        | 0.717±0.003        | 0.554±0.002        |
| TRFM RF              | 0.855±0.001        | 0.672±0.001        | 1.011±0.002        | 0.777±0.002        | 0.740±0.001        | 0.568±0.001        |
| CHEM-BERT            | 0.876±0.018        | 0.706±0.012        | 0.909±0.057        | 0.682±0.056        | 0.734±0.038        | <b>0.544±0.027</b> |
| ImageMol             | <b>0.776±0.012</b> | 0.620±0.014        | <b>0.780±0.017</b> | <b>0.578±0.022</b> | <b>0.711±0.012</b> | 0.554±0.009        |
| --- continue ---     |                    |                    |                    |                    |                    |                    |
|                      | 4. AA2AR           |                    | 5. AA3R            |                    | 6. CNR2            |                    |
|                      | RMSE               | MAE                | RMSE               | MAE                | RMSE               | MAE                |
| MoCLR <sub>GIN</sub> | 0.748±0.012        | 0.588±0.008        | 0.840±0.014        | 0.692±0.010        | 0.926±0.047        | 0.758±0.036        |
| MoCLR <sub>GCN</sub> | 0.819±0.011        | 0.651±0.008        | 0.855±0.010        | 0.700±0.011        | 0.978±0.023        | 0.803±0.021        |
| RNN LR               | 1.801±0.600        | 1.193±0.335        | 2.295±0.463        | 1.190±0.155        | 5.505±0.093        | 1.611±0.032        |
| TRFM LR              | 1.130±0.000        | 0.906±0.000        | 1.155±0.001        | 0.919±0.001        | 1.700±0.001        | 1.213±0.000        |
| RNN MLP              | 0.967±0.002        | 0.773±0.005        | 0.883±0.010        | 0.707±0.012        | 1.091±0.015        | 0.881±0.013        |
| TRFM MLP             | 0.948±0.013        | 0.744±0.005        | 0.945±0.010        | 0.749±0.014        | 1.144±0.055        | 0.903±0.038        |
| RNN RF               | 0.887±0.002        | 0.692±0.001        | 0.796±0.009        | <b>0.624±0.007</b> | 0.965±0.002        | 0.766±0.001        |
| TRFM RF              | 0.926±0.003        | 0.735±0.004        | 0.856±0.001        | 0.701±0.002        | 0.965±0.002        | 0.800±0.002        |
| CHEM-BERT            | 0.862±0.071        | 0.674±0.058        | 0.861±0.058        | 0.684±0.047        | 0.925±0.051        | 0.727±0.041        |
| ImageMol             | <b>0.734±0.015</b> | <b>0.573±0.009</b> | <b>0.793±0.008</b> | 0.634±0.001        | <b>0.905±0.004</b> | <b>0.717±0.015</b> |
| --- continue ---     |                    |                    |                    |                    |                    |                    |
|                      | 7. DRD2            |                    | 8. DRD3            |                    | 9. HRH3            |                    |
|                      | RMSE               | MAE                | RMSE               | MAE                | RMSE               | MAE                |
| MoCLR <sub>GIN</sub> | 0.814±0.009        | 0.591±0.007        | 0.858±0.017        | 0.673±0.022        | 0.734±0.006        | 0.581±0.004        |
| MoCLR <sub>GCN</sub> | 0.855±0.022        | 0.634±0.017        | 0.914±0.024        | 0.725±0.025        | 0.740±0.016        | 0.576±0.006        |
| RNN LR               | 1.142±0.077        | 0.839±0.038        | 1.316±0.011        | 0.942±0.005        | 1.616±0.236        | 0.943±0.070        |
| TRFM LR              | 1.000±0.000        | 0.719±0.000        | 1.219±0.000        | 0.914±0.000        | 1.169±0.002        | 0.911±0.002        |
| RNN MLP              | 0.895±0.006        | 0.694±0.005        | 1.021±0.007        | 0.819±0.007        | 0.871±0.015        | 0.702±0.011        |
| TRFM MLP             | 0.919±0.016        | 0.686±0.016        | 1.012±0.041        | 0.790±0.023        | 0.863±0.011        | 0.676±0.009        |
| RNN RF               | 0.837±0.001        | 0.612±0.001        | 0.861±0.001        | 0.685±0.001        | 0.771±0.002        | 0.613±0.002        |
| TRFM RF              | 0.864±0.001        | 0.636±0.002        | 0.904±0.001        | 0.717±0.001        | 0.770±0.002        | 0.602±0.001        |
| CHEM-BERT            | 0.816±0.011        | 0.587±0.013        | 0.803±0.029        | 0.631±0.026        | 0.770±0.033        | 0.594±0.022        |
| ImageMol             | <b>0.772±0.014</b> | <b>0.573±0.009</b> | <b>0.735±0.018</b> | <b>0.576±0.014</b> | <b>0.710±0.006</b> | <b>0.561±0.006</b> |
| --- continue ---     |                    |                    |                    |                    |                    |                    |
|                      | 10. OPRM           |                    |                    |                    |                    |                    |
|                      | RMSE               | MAE                |                    |                    |                    |                    |
| MoCLR <sub>GIN</sub> | 0.856±0.008        | 0.664±0.016        |                    |                    |                    |                    |
| MoCLR <sub>GCN</sub> | 0.853±0.009        | 0.653±0.020        |                    |                    |                    |                    |
| RNN LR               | 2.649±1.024        | 1.744±0.614        |                    |                    |                    |                    |
| TRFM LR              | 1.694±0.001        | 1.282±0.000        |                    |                    |                    |                    |
| RNN MLP              | 1.022±0.014        | 0.781±0.008        |                    |                    |                    |                    |
| TRFM MLP             | 1.084±0.009        | 0.849±0.007        |                    |                    |                    |                    |
| RNN RF               | 0.876±0.010        | 0.671±0.009        |                    |                    |                    |                    |
| TRFM RF              | 0.852±0.002        | 0.660±0.003        |                    |                    |                    |                    |
| CHEM-BERT            | 0.893±0.024        | 0.672±0.019        |                    |                    |                    |                    |
| ImageMol             | <b>0.849±0.018</b> | <b>0.645±0.015</b> |                    |                    |                    |                    |
