# Supplementary material for: Accurate prediction of molecular properties and drug targets using a self-supervised image representation learning framework
Source: Springer Nature journal article supplement (doi:10.1038/s42256-022-00557-6), 2022-11-17
Supplement: 42256_2022_557_MOESM10_ESM.pdf [file 42256_2022_557_MOESM10_ESM.pdf]

**Table S13:** The performance of different methods on 10 kinase scan datasets with balanced scaffold split. SS represents the p-values (one-sided significance level) of the McNemar's test between ImageMol and other comparison methods. The numbers in green background indicate statistically different models, using a significance threshold of 0.05.

| 1. BTK               |                    |                    |                    |                    |                    |                    |                    |       |
|----------------------|--------------------|--------------------|--------------------|--------------------|--------------------|--------------------|--------------------|-------|
|                      | accuracy           | auc                | aupr               | f1                 | precision          | recall             | kappa              | SS    |
| MoCLR <sub>GIN</sub> | 0.556±0.079        | 0.556±0.118        | 0.544±0.004        | 0.683±0.022        | 0.542±0.059        | 0.944±0.079        | 0.111±0.157        | 0.074 |
| MoCLR <sub>RCS</sub> | 0.556±0.039        | 0.602±0.129        | 0.618±0.138        | 0.593±0.105        | 0.574±0.069        | 0.722±0.283        | 0.111±0.079        | 0.074 |
| RNN LR               | 0.417±0.000        | 0.611±0.000        | 0.743±0.000        | 0.462±0.000        | 0.429±0.000        | 0.500±0.000        | -0.167±0.000       | 0.077 |
| TRFM LR              | 0.583±0.000        | 0.694±0.000        | 0.741±0.000        | 0.615±0.000        | 0.571±0.000        | 0.667±0.000        | 0.167±0.000        | 0.221 |
| RNN MLP              | 0.444±0.039        | 0.556±0.023        | 0.608±0.022        | 0.498±0.052        | 0.452±0.034        | 0.556±0.079        | -0.111±0.079       | 0.077 |
| TRFM MLP             | 0.444±0.039        | 0.537±0.013        | 0.653±0.005        | 0.442±0.057        | 0.443±0.042        | 0.444±0.079        | -0.111±0.079       | 0.041 |
| RNN RF               | 0.472±0.079        | 0.546±0.013        | 0.641±0.032        | 0.578±0.063        | 0.481±0.052        | 0.722±0.079        | -0.056±0.157       | 0.077 |
| TRFM RF              | 0.667±0.068        | 0.639±0.039        | 0.678±0.053        | 0.739±0.055        | 0.607±0.046        | 0.944±0.079        | 0.333±0.136        | 0.134 |
| CHEM-BERT            | 0.667±0.068        | 0.648±0.013        | 0.553±0.013        | 0.703±0.026        | 0.660±0.103        | 0.778±0.079        | 0.333±0.136        | 0.131 |
| ImageMol             | <b>0.889±0.039</b> | <b>0.843±0.026</b> | <b>0.795±0.006</b> | <b>0.901±0.031</b> | <b>0.821±0.051</b> | <b>1.000±0.000</b> | <b>0.778±0.079</b> | -     |
| 2. CDK4-cyclinD3     |                    |                    |                    |                    |                    |                    |                    |       |
|                      | accuracy           | auc                | aupr               | f1                 | precision          | recall             | kappa              | SS    |
| MoCLR <sub>GIN</sub> | 0.792±0.059        | 0.778±0.171        | 0.930±0.055        | 0.867±0.032        | 0.861±0.104        | 0.889±0.079        | 0.349±0.292        | 0.48  |
| MoCLR <sub>RCS</sub> | 0.833±0.059        | <b>0.944±0.039</b> | <b>0.983±0.012</b> | 0.886±0.036        | 0.944±0.079        | 0.833±0.000        | 0.587±0.180        | 0.48  |
| RNN LR               | 0.750±0.000        | 0.667±0.000        | 0.858±0.000        | 0.833±0.000        | 0.833±0.000        | 0.833±0.000        | 0.333±0.000        | 1     |
| TRFM LR              | 0.750±0.000        | 0.750±0.000        | 0.906±0.000        | 0.833±0.000        | 0.833±0.000        | 0.833±0.000        | 0.333±0.000        | 1     |
| RNN MLP              | 0.792±0.059        | 0.833±0.000        | 0.944±0.000        | 0.863±0.042        | 0.841±0.011        | 0.889±0.079        | 0.422±0.126        | 0.48  |
| TRFM MLP             | 0.750±0.000        | 0.639±0.039        | 0.871±0.023        | 0.833±0.000        | 0.833±0.000        | 0.833±0.000        | 0.333±0.000        | 1     |
| RNN RF               | 0.833±0.059        | 0.917±0.000        | 0.974±0.000        | 0.901±0.031        | 0.821±0.051        | <b>1.000±0.000</b> | 0.400±0.283        | 0.48  |
| TRFM RF              | 0.750±0.000        | 0.639±0.039        | 0.880±0.010        | 0.857±0.000        | 0.750±0.000        | <b>1.000±0.000</b> | 0.000±0.000        | 1     |
| CHEM-BERT            | 0.750±0.000        | 0.583±0.297        | 0.818±0.173        | 0.857±0.000        | 0.750±0.000        | <b>1.000±0.000</b> | 0.000±0.000        | 0.074 |
| ImageMol             | <b>0.875±0.000</b> | 0.917±0.068        | 0.977±0.018        | <b>0.914±0.007</b> | <b>0.952±0.067</b> | 0.889±0.079        | <b>0.676±0.054</b> | -     |
| 3. EGFR              |                    |                    |                    |                    |                    |                    |                    |       |
|                      | accuracy           | auc                | aupr               | f1                 | precision          | recall             | kappa              | SS    |
| MoCLR <sub>GIN</sub> | 0.758±0.043        | 0.583±0.067        | 0.667±0.069        | 0.799±0.041        | 0.841±0.011        | 0.762±0.067        | 0.496±0.078        | 0.48  |
| MoCLR <sub>RCS</sub> | 0.788±0.113        | 0.750±0.051        | 0.802±0.040        | 0.819±0.112        | 0.844±0.032        | 0.810±0.178        | 0.563±0.207        | 0     |
| RNN LR               | 0.545±0.000        | 0.536±0.000        | 0.775±0.000        | 0.706±0.000        | 0.600±0.000        | 0.857±0.000        | -0.170±0.000       | 0.134 |
| TRFM LR              | 0.818±0.000        | 0.821±0.000        | 0.859±0.000        | 0.875±0.000        | 0.778±0.000        | 1.000±0.000        | 0.560±0.000        | 1     |
| RNN MLP              | 0.545±0.074        | 0.536±0.029        | 0.756±0.023        | 0.703±0.062        | 0.597±0.033        | 0.857±0.117        | -0.163±0.131       | 0.074 |
| TRFM MLP             | 0.727±0.074        | 0.667±0.061        | 0.707±0.089        | 0.780±0.059        | 0.802±0.062        | 0.762±0.067        | 0.421±0.161        | 0.248 |
| RNN RF               | 0.636±0.000        | 0.548±0.017        | 0.753±0.020        | 0.750±0.000        | 0.667±0.000        | 0.857±0.000        | 0.120±0.000        | 0.371 |
| TRFM RF              | 0.697±0.043        | 0.607±0.000        | 0.639±0.001        | 0.808±0.022        | 0.679±0.030        | <b>1.000±0.000</b> | 0.199±0.140        | 1     |
| CHEM-BERT            | 0.727±0.074        | 0.845±0.094        | <b>0.930±0.044</b> | 0.779±0.043        | <b>0.879±0.171</b> | 0.762±0.178        | 0.379±0.275        | 0.077 |
| ImageMol             | <b>0.909±0.000</b> | <b>0.857±0.000</b> | 0.920±0.000        | <b>0.933±0.000</b> | 0.875±0.000        | <b>1.000±0.000</b> | <b>0.792±0.000</b> | -     |
| 4. FGFR1             |                    |                    |                    |                    |                    |                    |                    |       |
|                      | accuracy           | auc                | aupr               | f1                 | precision          | recall             | kappa              | SS    |
| MoCLR <sub>GIN</sub> | 0.667±0.068        | 0.695±0.249        | 0.815±0.168        | 0.762±0.027        | 0.667±0.068        | 0.905±0.067        | 0.248±0.193        | 0.134 |
| MoCLR <sub>RCS</sub> | 0.639±0.079        | 0.619±0.378        | 0.748±0.258        | 0.758±0.030        | 0.639±0.079        | 0.952±0.067        | 0.157±0.222        | 0.134 |
| RNN LR               | 0.583±0.000        | 0.771±0.000        | 0.863±0.000        | 0.737±0.000        | 0.583±0.000        | <b>1.000±0.000</b> | 0.000±0.000        | 0.134 |
| TRFM LR              | 0.833±0.000        | 0.743±0.000        | 0.816±0.000        | 0.857±0.000        | 0.857±0.000        | 0.857±0.000        | 0.657±0.000        | 1     |
| RNN MLP              | 0.694±0.079        | 0.848±0.059        | <b>0.910±0.039</b> | 0.697±0.179        | 0.800±0.141        | 0.762±0.337        | 0.375±0.088        | 0.221 |
| TRFM MLP             | 0.583±0.068        | 0.643±0.031        | 0.782±0.026        | 0.694±0.052        | 0.607±0.046        | 0.810±0.067        | 0.081±0.149        | 0.074 |
| RNN RF               | 0.583±0.000        | 0.476±0.027        | 0.541±0.017        | 0.737±0.000        | 0.583±0.000        | <b>1.000±0.000</b> | 0.000±0.000        | 0.134 |
| TRFM RF              | 0.583±0.000        | 0.476±0.013        | 0.523±0.005        | 0.737±0.000        | 0.583±0.000        | <b>1.000±0.000</b> | 0.000±0.000        | 0.134 |
| CHEM-BERT            | 0.583±0.000        | 0.429±0.117        | 0.542±0.100        | 0.737±0.000        | 0.583±0.000        | 1.000±0.000        | 0.000±0.000        | 0.077 |
| ImageMol             | <b>0.889±0.039</b> | <b>0.857±0.023</b> | 0.853±0.042        | <b>0.914±0.027</b> | <b>0.843±0.046</b> | <b>1.000±0.000</b> | <b>0.761±0.088</b> | -     |
| 5. FGFR2             |                    |                    |                    |                    |                    |                    |                    |       |
|                      | accuracy           | auc                | aupr               | f1                 | precision          | recall             | kappa              | SS    |
| MoCLR <sub>GIN</sub> | 0.778±0.104        | 0.667±0.132        | 0.867±0.058        | 0.861±0.069        | 0.809±0.065        | 0.926±0.105        | 0.287±0.330        | 0.683 |
| MoCLR <sub>RCS</sub> | 0.778±0.039        | 0.667±0.052        | 0.829±0.079        | 0.871±0.020        | 0.773±0.032        | <b>1.000±0.000</b> | 0.143±0.202        | 0.617 |
| RNN LR               | 0.583±0.000        | 0.741±0.000        | 0.912±0.000        | 0.706±0.000        | 0.750±0.000        | 0.667±0.000        | 0.000±0.000        | 0.45  |
| TRFM LR              | 0.667±0.000        | 0.704±0.000        | 0.856±0.000        | 0.750±0.000        | 0.857±0.000        | 0.667±0.000        | 0.273±0.000        | 0.683 |
| RNN MLP              | 0.667±0.000        | 0.716±0.046        | 0.882±0.012        | 0.750±0.000        | 0.857±0.000        | 0.667±0.000        | 0.273±0.000        | 0.683 |
| TRFM MLP             | 0.750±0.000        | 0.741±0.000        | 0.888±0.000        | 0.824±0.000        | 0.875±0.000        | 0.778±0.000        | 0.400±0.000        | 1     |
| RNN RF               | 0.611±0.039        | 0.685±0.055        | 0.897±0.019        | 0.730±0.034        | 0.759±0.013        | 0.704±0.052        | 0.037±0.052        | 0.45  |
| TRFM RF              | 0.639±0.039        | 0.556±0.030        | 0.708±0.009        | 0.722±0.039        | 0.849±0.011        | 0.630±0.052        | 0.237±0.050        | 0.45  |
| CHEM-BERT            | 0.806±0.039        | 0.765±0.106        | 0.910±0.055        | <b>0.886±0.020</b> | 0.795±0.032        | 1.000±0.000        | 0.286±0.202        | 0.023 |
| ImageMol             | <b>0.833±0.000</b> | <b>0.852±0.052</b> | <b>0.957±0.013</b> | 0.880±0.007        | <b>0.963±0.052</b> | 0.815±0.052        | <b>0.609±0.038</b> | -     |
| 6. FGFR3             |                    |                    |                    |                    |                    |                    |                    |       |
|                      | accuracy           | auc                | aupr               | f1                 | precision          | recall             | kappa              | SS    |
| MoCLR <sub>GIN</sub> | 0.639±0.239        | 0.760±0.039        | 0.824±0.086        | 0.580±0.414        | 0.519±0.378        | 0.667±0.471        | 0.267±0.377        | 0.077 |
| MoCLR <sub>RCS</sub> | 0.778±0.079        | 0.792±0.106        | 0.822±0.110        | 0.843±0.065        | 0.783±0.024        | 0.917±0.118        | 0.464±0.152        | 0.48  |
| RNN LR               | 0.500±0.000        | 0.646±0.015        | 0.814±0.017        | 0.500±0.000        | 0.750±0.000        | 0.375±0.000        | 0.100±0.000        | 0.134 |
| TRFM LR              | 0.583±0.000        | 0.812±0.000        | 0.915±0.000        | 0.545±0.000        | <b>1.000±0.000</b> | 0.375±0.000        | 0.286±0.000        | 0.371 |
| RNN MLP              | 0.444±0.039        | 0.469±0.026        | 0.709±0.039        | 0.522±0.016        | 0.631±0.084        | 0.458±0.059        | -0.124±0.158       | 0.074 |
| TRFM MLP             | 0.694±0.039        | 0.802±0.015        | 0.924±0.005        | 0.701±0.048        | <b>1.000±0.000</b> | 0.542±0.059        | 0.442±0.060        | 0.683 |
| RNN RF               | 0.333±0.000        | 0.312±0.000        | 0.619±0.000        | 0.429±0.000        | 0.500±0.000        | 0.375±0.000        | -0.333±0.000       | 0.041 |
| TRFM RF              | 0.722±0.039        | 0.646±0.078        | 0.833±0.072        | 0.751±0.026        | 0.944±0.079        | 0.625±0.000        | 0.462±0.091        | 0.617 |
| CHEM-BERT            | 0.667±0.000        | 0.438±0.077        | 0.623±0.055        | 0.793±0.010        | 0.678±0.016        | <b>0.958±0.059</b> | 0.048±0.067        | 0.077 |
| ImageMol             | <b>0.806±0.039</b> | <b>0.854±0.064</b> | <b>0.935±0.029</b> | <b>0.855±0.039</b> | 0.844±0.032        | 0.875±0.102        | <b>0.556±0.064</b> | -     |
| 7. FGFR4             |                    |                    |                    |                    |                    |                    |                    |       |
|                      | accuracy           | auc                | aupr               | f1                 | precision          | recall             | kappa              | SS    |
| MoCLR <sub>GIN</sub> | 0.667±0.136        | 0.773±0.121        | 0.756±0.168        | 0.758±0.078        | 0.617±0.103        | <b>1.000±0.000</b> | 0.333±0.272        | 0.371 |
| MoCLR <sub>RCS</sub> | 0.556±0.079        | 0.537±0.013        | 0.606±0.037        | 0.663±0.073        | 0.533±0.047        | 0.889±0.157        | 0.111±0.157        | 0.248 |
| RNN LR               | 0.583±0.000        | 0.528±0.000        | 0.462±0.000        | 0.615±0.000        | 0.571±0.000        | 0.667±0.000        | 0.167±0.000        | 0.617 |
| TRFM LR              | 0.583±0.000        | 0.639±0.000        | 0.532±0.000        | 0.615±0.000        | 0.571±0.000        | 0.667±0.000        | 0.167±0.000        | 0.683 |
| RNN MLP              | 0.500±0.068        | 0.269±0.035        | 0.362±0.010        | 0.621±0.070        | 0.497±0.041        | 0.833±0.136        | -0.000±0.136       | 0.134 |
| TRFM MLP             | 0.667±0.000        | 0.676±0.035        | 0.551±0.017        | 0.667±0.000        | 0.667±0.000        | 0.667±0.000        | 0.333±0.000        | 1     |
| RNN RF               | 0.389±0.039        | 0.389±0.000        | 0.518±0.000        | 0.419±0.060        | 0.397±0.045        | 0.444±0.079        | -0.222±0.079       | 0.074 |
| TRFM RF              | 0.694±0.039        | 0.602±0.013        | 0.504±0.006        | 0.733±0.026        | 0.655±0.042        | 0.833±0.000        | 0.389±0.079        | 0.617 |
| CHEM-BERT            | 0.556±0.079        | 0.528±0.060        | 0.470±0.043        | 0.500±0.204        | 0.533±0.047        | 0.556±0.342        | 0.111±0.157        | 0.45  |
| ImageMol             | <b>0.750±0.000</b> | <b>0.833±0.045</b> | <b>0.860±0.039</b> | <b>0.790±0.015</b> | <b>0.683±0.022</b> | 0.944±0.079        | <b>0.500±0.000</b> | -     |
| 8. FLT3              |                    |                    |                    |                    |                    |                    |                    |       |
|                      | accuracy           | auc                | aupr               | f1                 | precision          | recall             | kappa              | SS    |
| MoCLR <sub>GIN</sub> | 0.879±0.043        | 0.722±0.091        | 0.916±0.039        | 0.932±0.022        | 0.873±0.039        | <b>1.000±0.000</b> | 0.414±0.293        | 1     |
| MoCLR <sub>RCS</sub> | 0.848±0.113        | 0.722±0.208        | 0.927±0.055        | 0.908±0.072        | 0.898±0.076        | 0.926±0.105        | 0.411±0.427        | 0.48  |
| RNN LR               | 0.727±0.000        | <b>0.778±0.000</b> | <b>0.943±0.000</b> | 0.824±0.000        | 0.875±0.000        | 0.778±0.000        | 0.233±0.000        | 0.48  |
| TRFM LR              | 0.818±0.000        | 0.611±0.000        | 0.865±0.000        | 0.889±0.000        | 0.889±0.000        | 0.889±0.000        | 0.389±0.000        | 1     |
| RNN MLP              | 0.727±0.000        | 0.630±0.105        | 0.860±0.058        | 0.824±0.000        | 0.875±0.000        | 0.778±0.000        | 0.233±0.000        | 0.48  |
| TRFM MLP             | 0.697±0.043        | 0.667±0.136        | 0.865±0.095        | 0.799±0.035        | 0.869±0.008        | 0.741±0.052        | 0.195±0.053        | 0.248 |
| RNN RF               | 0.758±0.086        | 0.519±0.026        | 0.757±0.045        | 0.843±0.065        | 0.878±0.015        | 0.815±0.105        | 0.299±0.127        | 0.248 |
| TRFM RF              | 0.848±0.043        | 0.546±0.035        | 0.800±0.047        |                    |                    |                    |                    |       |
