# Supplementary material for: Accurate prediction of molecular properties and drug targets using a self-supervised image representation learning framework
Source: Springer Nature journal article supplement (doi:10.1038/s42256-022-00557-6), 2022-11-17
Supplement: 42256_2022_557_MOESM11_ESM.pdf [file 42256_2022_557_MOESM11_ESM.pdf]

**Table S14(a):** Results of statistical significance tests between ImageMol and GROVER-10M, MPG-10M, X-MOL, MolCLRGIN on the 8 molecular property prediction datasets with scaffold split, where numbers represent the p-values (one-sided significance level) of the McNemar's test between the models in the table (GROVER-10M, MPG-10M, X-MOL and MolCLRGIN) and ImageMol. The numbers in green background indicate statistically different models, using a significance threshold of 0.05.

|         | GROVER-10M | MPG-10M | X-MOL    | MolCLRGIN |
|---------|------------|---------|----------|-----------|
| BACE    | 0.473      | 0.061   | 0.523    | 1         |
| BBBP    | 0.458      | 0.486   | 0.138    | 0.855     |
| ClinTox | 0.267      | 0.332   | 0.421    | 0.851     |
| HIV     | 0.516      | 0.091   | 0.463    | 0.001     |
| MUV     | 0.606      | 0.081   | 0.373    | 0.239     |
| SIDER   | 0.379      | 0.010   | 3.59E-11 | 0.0000803 |
| Tox21   | 0.041      | 0.006   | 0.615    | 0.046     |
| ToxCast | 0.301      | 0.299   | 3.31E-07 | -         |

— continue —

**Table S14(b):** Results of statistical significance tests between ImageMol and GROVER-10M, MPG-10M on the 6 molecular property prediction datasets with random scaffold split, where numbers represent the p-values (one-sided significance level) of the McNemar's test between the models in the table (GROVER-10M, MPG-10M) and ImageMol. The numbers in green background indicate statistically different models, using a significance threshold of 0.05. 0 indicates significance level less than E-100.

|         | GROVER-10M | MPG-10M |
|---------|------------|---------|
| BACE    | 0.404      | 0.182   |
| BBBP    | 0.752      | 0.011   |
| ClinTox | 4.16E-06   | 0.683   |
| SIDER   | 0.198      | 0.159   |
| Tox21   | 0          | 0.136   |
| ToxCast | 0          | 0       |
