# Supplementary material for: Accurate prediction of molecular properties and drug targets using a self-supervised image representation learning framework
Source: Springer Nature journal article supplement (doi:10.1038/s42256-022-00557-6), 2022-11-17
Supplement: 42256_2022_557_MOESM12_ESM.pdf [file 42256_2022_557_MOESM12_ESM.pdf]

**Table S15(a):** Results of statistical significance tests between ImageMol and Image-based methods (Chemception, ADMET-CNN, QSAR-CNN) on five CYP450 isoforms training sets (PubChem Data Set I) with 5-fold cross-validation, where numbers represent the p-values (one-sided significance level) of the McNemar's test. The numbers in green background indicate statistically different models, using a significance threshold of 0.05. 0 indicates statistical significance less than E-100.

| PubChem Data Set I | Chemception | ADMET-CNN | QSAR-CNN  |
|--------------------|-------------|-----------|-----------|
| CYP1A2             | 8.31E-46    | 0         | 0         |
| CYP2C9             | 9.32E-39    | 7.49E-95  | 1.22E-95  |
| CYP2C19            | 3.07E-42    | 0         | 0         |
| CYP2D6             | 6.48E-42    | 2.36E-38  | 2.36E-38  |
| CYP3A4             | 9.89E-18    | 2.47E-18  | 1.94E-161 |

— continue —

**Table S15(b):** Results of statistical significance tests between ImageMol and Image-based methods (Chemception, ADMET-CNN, QSAR-CNN) on five CYP450 isoforms validation sets (PubChem Data Set II), where numbers represent the p-values (one-sided significance level) of the McNemar's test. The numbers in green background indicate statistically different models, using a significance threshold of 0.05. 0 indicates statistical significance less than E-100.

| PubChem Data Set II | Chemception | ADMET-CNN | QSAR-CNN |
|---------------------|-------------|-----------|----------|
| CYP1A2              | 1.23E-30    | 0         | 2.56E-28 |
| CYP2C9              | 4.43E-36    | 3.26E-20  | 1.78E-31 |
| CYP2C19             | 3.07E-20    | 1.94E-23  | 4.62E-15 |
| CYP2D6              | 2.41E-21    | 4.94E-20  | 2.21E-25 |
| CYP3A4              | 5.27E-16    | 0         | 2.27E-36 |
