# Supplementary material for: Accurate prediction of molecular properties and drug targets using a self-supervised image representation learning framework
Source: Springer Nature journal article supplement (doi:10.1038/s42256-022-00557-6), 2022-11-17
Supplement: 42256_2022_557_MOESM13_ESM.pdf [file 42256_2022_557_MOESM13_ESM.pdf]

**Table S16:** Results of statistical significance tests on the 5 CYP450 datasets with balanced scaffold split, where numbers represent the p-values (one-sided significance level) of the McNemar’s test between the models in the table (CHEM-BERT, GROVER, MolCLRGIN, MolCLRGCN, RNN\_LR, RNN\_MLP, RNN\_RF, TRFM\_LR, TRFM\_MLP and TRFM\_RF) and ImageMol. The numbers in green background indicate statistically different models, using a significance threshold of 0.05.

|                      | CHEM-BERT | GROVER   | MolCLRGIN | MolCLRGCN | RNN_LR   |
|----------------------|-----------|----------|-----------|-----------|----------|
| CYP1A2               | 3.86E-57  | 0.003    | 0.151     | 0.001     | 2.29E-16 |
| CYP2C9               | 8.63E-18  | 0.001    | 0.203     | 0.007     | 9.08E-09 |
| CYP2C19              | 5.35E-34  | 0.002    | 0.056     | 0.791     | 8.32E-11 |
| CYP2D6               | 0.001     | 0.065    | 0.135     | 0.736     | 0.002    |
| CYP3A4               | 1.31E-27  | 0.019    | 0.069     | 0.001     | 6.14E-09 |
| ----- continue ----- |           |          |           |           |          |
|                      | RNN_MLP   | RNN_RF   | TRFM_LR   | TRFM_MLP  | TRFM_RF  |
| CYP1A2               | 2.55E-29  | 9.14E-07 | 5.50E-05  | 8.58E-08  | 5.53E-06 |
| CYP2C9               | 2.39E-19  | 3.24E-06 | 5.38E-08  | 8.24E-07  | 5.87E-05 |
| CYP2C19              | 4.70E-19  | 1.91E-09 | 1.25E-06  | 4.45E-08  | 7.07E-05 |
| CYP2D6               | 9.18E-05  | 0.043    | 0.021     | 2.80E-05  | 0.07     |
| CYP3A4               | 9.02E-12  | 3.73E-09 | 0.001     | 7.39E-08  | 0.0002   |
