# Supplementary material for: Accurate prediction of molecular properties and drug targets using a self-supervised image representation learning framework
Source: Springer Nature journal article supplement (doi:10.1038/s42256-022-00557-6), 2022-11-17
Supplement: 42256_2022_557_MOESM14_ESM.pdf [file 42256_2022_557_MOESM14_ESM.pdf]

**Table S17:** Results of statistical significance tests on the 13 SARS-CoV-2 datasets with balanced scaffold split, where numbers represent the p-values (one-sided significance level) of the McNemar's test between the models in the table (CHEM-BERT, GROVER, MolCLRGIN and MolCLRGCN, RNN\_LR, RNN\_MLP, RNN\_RF, TRFM\_LR, TRFM\_MLP and TRFM\_RF) and ImageMol. The numbers in green background indicate statistically different models, using a significance threshold of 0.05.

|                      | CHEM-BERT | GROVER   | MolCLRGIN | MolCLRGCN | RNN_LR   |
|----------------------|-----------|----------|-----------|-----------|----------|
| 3CL                  | 0.221     | 0.683    | 0.221     | 0.221     | 1        |
| ACE2                 | 0.48      | 0.134    | 0.48      | 0.48      | 0.009    |
| HEK293               | 0.024     | 0.576    | 0.073     | 0.001     | 0.014    |
| hCYTOX               | 0.043     | 0.382    | 0.07      | 0.539     | 0.013    |
| MERS-PPE             | 0.002     | 0.64     | 0.0001    | 0.0004    | 0.002    |
| MERS-PPE_cs          | 0.062     | 0.232    | 0.185     | 0.845     | 0.016    |
| CoV-PPE              | 0.012     | 0.562    | 0.05      | 0.185     | 0.057    |
| CoV-PPE_cs           | 0.064     | 0.042    | 0.136     | 0.245     | 0.054    |
| CPE                  | 0.462     | 0.349    | 0.482     | 0.319     | 0.834    |
| Cytotox              | 0.017     | 1.72E-06 | 1.22E-08  | 1.22E-08  | 0.07     |
| AlphaLISA            | 1.35E-07  | 0.65     | 0.671     | 0.252     | 3.28E-05 |
| TruHit               | 2.42E-06  | 0.456    | 0.511     | 0.002     | 0.0001   |
| TMPRSS2              | 0.003     | 0.353    | 0.29      | 0.011     | 4.25E-05 |
| ----- continue ----- |           |          |           |           |          |
|                      | RNN_MLP   | RNN_RF   | TRFM_LR   | TRFM_MLP  | TRFM_RF  |
| 3CL                  | 0.505     | 0.371    | 0.289     | 0.45      | 0.371    |
| ACE2                 | 0.009     | 0.077    | 0.016     | 0.016     | 0.852    |
| HEK293               | 3.12E-05  | 0.046    | 0.03      | 0.0004    | 0.523    |
| hCYTOX               | 0.012     | 0.128    | 0.196     | 0.001     | 0.855    |
| MERS-PPE             | 0.001     | 0.018    | 0.0008    | 0.0006    | 0.142    |
| MERS-PPE_cs          | 0.0002    | 0.09     | 0.0271    | 0.011     | 0.775    |
| CoV-PPE              | 0.011     | 0.002    | 0.022     | 2.20E-05  | 0.153    |
| CoV-PPE_cs           | 2.33E-06  | 0.01     | 0.043     | 0.056     | 0.651    |
| CPE                  | 0.293     | 0.079    | 0.38      | 0.025     | 0.154    |
| Cytotox              | 0.053     | 0.0003   | 1.39E-05  | 0.004     | 3.71E-07 |
| AlphaLISA            | 4.96E-08  | 0.019    | 0.318     | 1.16E-05  | 0.043    |
| TruHit               | 1.22E-07  | 0.0006   | 0.032     | 1.23E-04  | 0.014    |
| TMPRSS2              | 1.53E-06  | 0.007    | 0.004     | 1.15E-06  | 0.246    |
