# Supplementary material for: Accurate prediction of molecular properties and drug targets using a self-supervised image representation learning framework
Source: Springer Nature journal article supplement (doi:10.1038/s42256-022-00557-6), 2022-11-17
Supplement: 42256_2022_557_MOESM15_ESM.pdf [file 42256_2022_557_MOESM15_ESM.pdf]

**Table S20:** The experimental results of REDIAL-2020, ImageMol\_NonPretrained and ImageMol for anti-SARS-CoV-2 activities estimation. ACC, accuracy; F1, F1 score; SEN, sensitivity; PREC, precision; AUC, area under the receiver operating characteristic curve. ImageMol (3 times) represents the mean  $\pm$  standard deviation of the results of 3 runs with different random seeds.

| Datasets                                                       | Abbreviation | Methods                | Metrics           |                   |                   |                   |                   |
|----------------------------------------------------------------|--------------|------------------------|-------------------|-------------------|-------------------|-------------------|-------------------|
|                                                                |              |                        | ACC               | F1                | SEN               | PREC              | AUC               |
| 3CL_enzymatic_activity                                         | 3CL          | REDIAL-2020            | 0.712             | 0.705             | 0.681             | <b>0.731</b>      | 0.713             |
|                                                                |              | ImageMol NonPretrained | 0.621             | 0.645             | 0.682             | 0.612             | 0.671             |
|                                                                |              | ImageMol               | <b>0.731</b>      | <b>0.758</b>      | <b>0.812</b>      | 0.710             | <b>0.768</b>      |
|                                                                |              | ImageMol (3 times)     | 0.722 $\pm$ 0.009 | 0.754 $\pm$ 0.005 | 0.802 $\pm$ 0.011 | 0.711 $\pm$ 0.001 | 0.762 $\pm$ 0.007 |
| ACE2_enzymatic_activity                                        | ACE2         | REDIAL-2020            | <b>0.755</b>      | <b>0.777</b>      | <b>0.840</b>      | 0.724             | <b>0.753</b>      |
|                                                                |              | ImageMol NonPretrained | 0.633             | 0.609             | 0.560             | 0.667             | 0.680             |
|                                                                |              | ImageMol               | 0.728             | 0.752             | 0.771             | <b>0.733</b>      | 0.719             |
|                                                                |              | ImageMol (3 times)     | 0.724 $\pm$ 0.005 | 0.744 $\pm$ 0.008 | 0.806 $\pm$ 0.035 | 0.695 $\pm$ 0.038 | 0.72 $\pm$ 0.001  |
| Human_fibroblast_toxicity                                      | hCYTOX       | REDIAL-2020            | 0.710             | 0.713             | 0.719             | 0.706             | 0.710             |
|                                                                |              | ImageMol NonPretrained | 0.693             | 0.679             | 0.649             | <b>0.712</b>      | 0.686             |
|                                                                |              | ImageMol               | <b>0.725</b>      | <b>0.739</b>      | <b>0.768</b>      | <b>0.712</b>      | <b>0.753</b>      |
|                                                                |              | ImageMol (3 times)     | 0.725 $\pm$ 0.004 | 0.716 $\pm$ 0.013 | 0.696 $\pm$ 0.044 | 0.741 $\pm$ 0.022 | 0.727 $\pm$ 0.009 |
| MERS_Pseudotyped_particle_entry_(Huh7_tox_counterscreen)       | MERS-PPE_cs  | REDIAL-2020            | 0.703             | 0.680             | 0.629             | 0.739             | 0.703             |
|                                                                |              | ImageMol NonPretrained | 0.778             | 0.760             | 0.704             | 0.826             | 0.775             |
|                                                                |              | ImageMol               | <b>0.834</b>      | <b>0.821</b>      | <b>0.761</b>      | <b>0.891</b>      | <b>0.780</b>      |
|                                                                |              | ImageMol (3 times)     | 0.823 $\pm$ 0.011 | 0.820 $\pm$ 0.001 | 0.771 $\pm$ 0.010 | 0.876 $\pm$ 0.015 | 0.771 $\pm$ 0.009 |
| MERS_Pseudotyped_particle_entry                                | MERS-PPE     | REDIAL-2020            | 0.696             | 0.698             | 0.698             | 0.698             | 0.696             |
|                                                                |              | ImageMol NonPretrained | 0.669             | 0.692             | 0.740             | 0.651             | 0.709             |
|                                                                |              | ImageMol               | <b>0.738</b>      | <b>0.750</b>      | <b>0.781</b>      | <b>0.722</b>      | <b>0.784</b>      |
|                                                                |              | ImageMol (3 times)     | 0.724 $\pm$ 0.014 | 0.731 $\pm$ 0.019 | 0.747 $\pm$ 0.034 | 0.717 $\pm$ 0.005 | 0.773 $\pm$ 0.011 |
| SARS-CoV_Pseudotyped_particle_entry_(VeroE6_tox_counterscreen) | CoV1-PPE_cs  | REDIAL-2020            | 0.659             | 0.636             | 0.583             | 0.700             | 0.661             |
|                                                                |              | ImageMol NonPretrained | 0.575             | 0.667             | <b>0.833</b>      | 0.556             | 0.533             |
|                                                                |              | ImageMol               | <b>0.766</b>      | <b>0.776</b>      | 0.792             | <b>0.760</b>      | <b>0.768</b>      |
|                                                                |              | ImageMol (3 times)     | 0.768 $\pm$ 0.002 | 0.775 $\pm$ 0.001 | 0.778 $\pm$ 0.014 | 0.773 $\pm$ 0.013 | 0.775 $\pm$ 0.005 |
| SARS-CoV_Pseudotyped_particle_entry                            | CoV1-PPE     | REDIAL-2020            | 0.665             | 0.658             | 0.643             | 0.674             | 0.665             |
|                                                                |              | ImageMol NonPretrained | 0.650             | 0.657             | 0.667             | 0.647             | 0.680             |
|                                                                |              | ImageMol               | <b>0.673</b>      | <b>0.693</b>      | <b>0.735</b>      | 0.655             | <b>0.712</b>      |
|                                                                |              | ImageMol (3 times)     | 0.681 $\pm$ 0.008 | 0.682 $\pm$ 0.01  | 0.686 $\pm$ 0.005 | 0.684 $\pm$ 0.03  | 0.703 $\pm$ 0.008 |
| SARS-CoV-2_cytopathic_effect_(CPE)                             | CPE          | REDIAL-2020            | 0.651             | 0.643             | 0.626             | 0.661             | 0.651             |
|                                                                |              | ImageMol NonPretrained | 0.624             | 0.627             | 0.627             | 0.627             | 0.639             |
|                                                                |              | ImageMol               | <b>0.678</b>      | <b>0.696</b>      | <b>0.733</b>      | <b>0.663</b>      | <b>0.658</b>      |
|                                                                |              | ImageMol (3 times)     | 0.669 $\pm$ 0.01  | 0.677 $\pm$ 0.019 | 0.693 $\pm$ 0.04  | 0.662 $\pm$ 0.001 | 0.669 $\pm$ 0.011 |
| SARS-CoV-2_cytopathic_effect_(host_tox_counterscreen)          | Cytotox      | REDIAL-2020            | 0.688             | 0.700             | 0.727             | 0.675             | 0.688             |
|                                                                |              | ImageMol NonPretrained | 0.683             | 0.684             | 0.686             | <b>0.682</b>      | 0.696             |
|                                                                |              | ImageMol               | <b>0.694</b>      | <b>0.698</b>      | <b>0.740</b>      | 0.661             | <b>0.729</b>      |
|                                                                |              | ImageMol (3 times)     | 0.690 $\pm$ 0.005 | 0.689 $\pm$ 0.008 | 0.686 $\pm$ 0.036 | 0.694 $\pm$ 0.020 | 0.728 $\pm$ 0.001 |
| Spike-ACE2_protein-protein_interaction_(AlphaLISA)             | AlphaLISA    | REDIAL-2020            | <b>0.790</b>      | <b>0.787</b>      | 0.777             | <b>0.798</b>      | 0.790             |
|                                                                |              | ImageMol NonPretrained | 0.735             | 0.710             | 0.650             | 0.784             | 0.756             |
|                                                                |              | ImageMol               | 0.758             | 0.766             | <b>0.812</b>      | 0.724             | <b>0.800</b>      |
|                                                                |              | ImageMol (3 times)     | 0.747 $\pm$ 0.012 | 0.758 $\pm$ 0.008 | 0.796 $\pm$ 0.016 | 0.723 $\pm$ 0.001 | 0.793 $\pm$ 0.007 |
| Spike-ACE2_protein-protein_interaction_(TruHit_Counterscreen)  | TruHit       | REDIAL-2020            | 0.734             | 0.737             | 0.746             | <b>0.728</b>      | 0.734             |
|                                                                |              | ImageMol NonPretrained | 0.714             | 0.747             | <b>0.841</b>      | 0.671             | 0.750             |
|                                                                |              | ImageMol               | <b>0.742</b>      | <b>0.762</b>      | 0.825             | 0.708             | <b>0.813</b>      |
|                                                                |              | ImageMol (3 times)     | 0.750 $\pm$ 0.008 | 0.758 $\pm$ 0.004 | 0.782 $\pm$ 0.044 | 0.738 $\pm$ 0.031 | 0.806 $\pm$ 0.006 |
