# Supplementary material for: Accurate prediction of molecular properties and drug targets using a self-supervised image representation learning framework
Source: Springer Nature journal article supplement (doi:10.1038/s42256-022-00557-6), 2022-11-17
Supplement: 42256_2022_557_MOESM16_ESM.pdf [file 42256_2022_557_MOESM16_ESM.pdf]

Table S21: The performance of different methods on 13 SARS-CoV-2 datasets with balanced scaffold split.

| 1. 3CL enzymatic activity                                         |                    |                    |                    |                    |                    |                    |                    |
|-------------------------------------------------------------------|--------------------|--------------------|--------------------|--------------------|--------------------|--------------------|--------------------|
|                                                                   | accuracy           | auc                | aupr               | f1                 | precision          | recall             | kappa              |
| MoCLR <sub>GIN</sub>                                              | 0.810±0.013        | 0.641±0.207        | 0.467±0.194        | 0.222±0.314        | 0.182±0.257        | 0.286±0.404        | 0.186±0.263        |
| MoCLR <sub>GCN</sub>                                              | 0.810±0.013        | 0.777±0.060        | 0.496±0.087        | 0.133±0.189        | 0.222±0.314        | 0.095±0.135        | 0.106±0.150        |
| RNN LR                                                            | <b>0.886±0.000</b> | 0.760±0.000        | 0.653±0.000        | 0.600±0.000        | <b>1.000±0.000</b> | 0.429±0.000        | 0.545±0.000        |
| TRFM LR                                                           | 0.800±0.000        | 0.724±0.000        | 0.368±0.000        | 0.462±0.000        | 0.500±0.000        | 0.429±0.000        | 0.340±0.000        |
| RNN MLP                                                           | 0.876±0.049        | 0.852±0.019        | 0.662±0.032        | 0.601±0.191        | 0.758±0.078        | 0.524±0.243        | 0.536±0.211        |
| TRFM MLP                                                          | 0.829±0.000        | 0.784±0.028        | 0.555±0.055        | 0.500±0.000        | 0.600±0.000        | 0.429±0.000        | 0.400±0.000        |
| RNN RF                                                            | 0.848±0.027        | 0.837±0.008        | 0.792±0.023        | 0.367±0.165        | <b>1.000±0.000</b> | 0.238±0.135        | 0.322±0.158        |
| TRFM RF                                                           | 0.829±0.000        | 0.831±0.003        | 0.767±0.012        | 0.250±0.000        | <b>1.000±0.000</b> | 0.143±0.000        | 0.211±0.000        |
| CHEM-BERT                                                         | 0.800±0.040        | 0.842±0.040        | 0.607±0.066        | 0.457±0.081        | 0.587±0.112        | 0.476±0.269        | 0.351±0.046        |
| GROVER                                                            | <b>0.886±0.000</b> | 0.947±0.006        | 0.821±0.019        | 0.660±0.047        | 0.838±0.120        | 0.571±0.117        | 0.596±0.040        |
| ImageMol                                                          | <b>0.886±0.023</b> | <b>0.964±0.004</b> | <b>0.842±0.026</b> | <b>0.7±0.064</b>   | 0.738±0.07         | <b>0.667±0.067</b> | <b>0.629±0.078</b> |
| 2. ACE2 enzymatic activity                                        |                    |                    |                    |                    |                    |                    |                    |
|                                                                   | accuracy           | auc                | aupr               | f1                 | precision          | recall             | kappa              |
| MoCLR <sub>GIN</sub>                                              | 0.801±0.050        | 0.668±0.075        | 0.199±0.051        | 0.232±0.165        | 0.222±0.166        | <b>0.286±0.233</b> | 0.135±0.141        |
| MoCLR <sub>GCN</sub>                                              | <b>0.865±0.000</b> | 0.662±0.082        | 0.202±0.068        | 0.204±0.116        | 0.147±0.066        | 0.333±0.471        | 0.115±0.006        |
| RNN LR                                                            | 0.750±0.000        | 0.486±0.003        | 0.129±0.000        | 0.235±0.000        | 0.200±0.000        | 0.286±0.000        | 0.091±0.000        |
| TRFM LR                                                           | 0.692±0.000        | 0.444±0.000        | 0.123±0.000        | 0.111±0.000        | 0.091±0.000        | 0.143±0.000        | -0.064±0.000       |
| RNN MLP                                                           | 0.776±0.040        | 0.407±0.013        | 0.104±0.002        | 0.099±0.000        | 0.088±0.000        | 0.112±0.000        | -0.115±0.038       |
| TRFM MLP                                                          | 0.737±0.024        | 0.519±0.045        | 0.133±0.012        | 0.087±0.062        | 0.081±0.060        | 0.095±0.067        | -0.065±0.068       |
| RNN RF                                                            | 0.788±0.000        | 0.489±0.014        | 0.119±0.002        | 0.029±0.000        | 0.024±0.000        | 0.035±0.000        | -0.109±0.000       |
| TRFM RF                                                           | 0.853±0.009        | 0.503±0.030        | 0.136±0.010        | 0.041±0.000        | 0.043±0.000        | 0.039±0.000        | -0.023±0.016       |
| CHEM-BERT                                                         | 0.808±0.042        | 0.729±0.041        | 0.309±0.038        | 0.209±0.040        | 0.296±0.146        | 0.190±0.067        | 0.108±0.057        |
| GROVER                                                            | 0.814±0.018        | 0.528±0.020        | 0.138±0.011        | 0.121±0.086        | 0.167±0.118        | 0.095±0.067        | 0.026±0.095        |
| ImageMol                                                          | 0.859±0.009        | <b>0.796±0.025</b> | <b>0.343±0.059</b> | <b>0.259±0.052</b> | <b>0.467±0.047</b> | 0.19±0.067         | <b>0.198±0.036</b> |
| 3. HEK293 cell line toxicity                                      |                    |                    |                    |                    |                    |                    |                    |
|                                                                   | accuracy           | auc                | aupr               | f1                 | precision          | recall             | kappa              |
| MoCLR <sub>GIN</sub>                                              | 0.706±0.014        | 0.723±0.021        | 0.513±0.013        | 0.467±0.064        | 0.566±0.027        | 0.403±0.083        | 0.274±0.056        |
| MoCLR <sub>GCN</sub>                                              | 0.692±0.035        | 0.727±0.033        | 0.549±0.059        | 0.552±0.025        | 0.537±0.054        | 0.590±0.107        | 0.323±0.035        |
| RNN LR                                                            | 0.673±0.000        | 0.619±0.000        | 0.467±0.002        | 0.374±0.000        | 0.494±0.000        | 0.301±0.000        | 0.170±0.000        |
| TRFM LR                                                           | 0.677±0.000        | 0.691±0.000        | 0.524±0.000        | 0.523±0.000        | 0.503±0.000        | 0.545±0.000        | 0.280±0.000        |
| RNN MLP                                                           | 0.642±0.017        | 0.585±0.007        | 0.383±0.004        | 0.236±0.136        | 0.366±0.057        | 0.198±0.132        | 0.057±0.047        |
| TRFM MLP                                                          | 0.655±0.010        | 0.688±0.005        | 0.518±0.017        | 0.492±0.002        | 0.472±0.013        | 0.515±0.014        | 0.231±0.011        |
| RNN RF                                                            | 0.680±0.005        | 0.699±0.007        | 0.555±0.007        | 0.441±0.017        | 0.509±0.010        | 0.389±0.023        | 0.222±0.017        |
| TRFM RF                                                           | 0.715±0.003        | 0.750±0.001        | <b>0.634±0.005</b> | 0.501±0.008        | 0.582±0.005        | 0.441±0.011        | 0.307±0.009        |
| CHEM-BERT                                                         | 0.703±0.010        | 0.730±0.010        | 0.590±0.046        | 0.441±0.169        | 0.584±0.051        | 0.422±0.215        | 0.266±0.108        |
| GROVER                                                            | 0.721±0.001        | 0.763±0.011        | 0.631±0.013        | 0.546±0.037        | <b>0.678±0.036</b> | 0.457±0.072        | 0.383±0.024        |
| ImageMol                                                          | <b>0.735±0.023</b> | <b>0.775±0.005</b> | 0.632±0.012        | <b>0.608±0.018</b> | 0.589±0.039        | <b>0.632±0.029</b> | <b>0.409±0.038</b> |
| 4. Human fibroblast toxicity                                      |                    |                    |                    |                    |                    |                    |                    |
|                                                                   | accuracy           | auc                | aupr               | f1                 | precision          | recall             | kappa              |
| MoCLR <sub>GIN</sub>                                              | 0.686±0.006        | 0.700±0.010        | 0.523±0.019        | 0.447±0.025        | 0.553±0.017        | 0.378±0.039        | 0.239±0.018        |
| MoCLR <sub>GCN</sub>                                              | 0.708±0.003        | 0.721±0.013        | 0.563±0.015        | 0.506±0.070        | 0.592±0.023        | 0.458±0.111        | 0.307±0.048        |
| RNN LR                                                            | 0.654±0.000        | 0.644±0.000        | 0.483±0.000        | 0.418±0.000        | 0.484±0.000        | 0.367±0.000        | 0.179±0.000        |
| TRFM LR                                                           | 0.689±0.000        | 0.719±0.000        | 0.587±0.000        | 0.526±0.000        | 0.541±0.000        | 0.512±0.000        | 0.295±0.000        |
| RNN MLP                                                           | 0.663±0.011        | 0.602±0.009        | 0.420±0.011        | 0.185±0.045        | 0.500±0.082        | 0.114±0.031        | 0.070±0.035        |
| TRFM MLP                                                          | 0.650±0.019        | 0.683±0.010        | 0.531±0.020        | 0.506±0.011        | 0.487±0.026        | 0.532±0.044        | 0.237±0.019        |
| RNN RF                                                            | 0.690±0.009        | 0.687±0.005        | 0.563±0.008        | 0.448±0.031        | 0.561±0.017        | 0.373±0.038        | 0.245±0.031        |
| TRFM RF                                                           | 0.720±0.004        | 0.742±0.003        | 0.632±0.011        | 0.521±0.009        | 0.615±0.008        | 0.452±0.009        | 0.329±0.011        |
| CHEM-BERT                                                         | 0.709±0.004        | 0.731±0.002        | 0.577±0.024        | 0.517±0.052        | 0.587±0.012        | 0.472±0.091        | 0.314±0.038        |
| GROVER                                                            | 0.726±0.013        | 0.757±0.010        | <b>0.655±0.012</b> | 0.539±0.038        | 0.625±0.035        | 0.480±0.064        | 0.350±0.033        |
| ImageMol                                                          | <b>0.733±0.012</b> | <b>0.760±0.002</b> | 0.614±0.018        | <b>0.571±0.022</b> | <b>0.632±0.05</b>  | <b>0.532±0.071</b> | <b>0.381±0.002</b> |
| 5. MERS Pseudotyped particle entry (Huh7 tox counterscreen)       |                    |                    |                    |                    |                    |                    |                    |
|                                                                   | accuracy           | auc                | aupr               | f1                 | precision          | recall             | kappa              |
| MoCLR <sub>GIN</sub>                                              | 0.710±0.010        | 0.718±0.002        | 0.498±0.012        | 0.436±0.080        | 0.554±0.011        | 0.373±0.118        | 0.256±0.067        |
| MoCLR <sub>GCN</sub>                                              | 0.726±0.003        | 0.752±0.018        | 0.572±0.030        | 0.466±0.080        | 0.610±0.051        | 0.400±0.119        | 0.297±0.050        |
| RNN LR                                                            | 0.673±0.003        | 0.633±0.000        | 0.451±0.000        | 0.458±0.003        | 0.476±0.005        | 0.441±0.003        | 0.224±0.005        |
| TRFM LR                                                           | 0.682±0.001        | 0.725±0.000        | 0.561±0.000        | 0.473±0.002        | 0.492±0.001        | 0.456±0.003        | 0.246±0.003        |
| RNN MLP                                                           | 0.691±0.004        | 0.631±0.004        | 0.414±0.009        | 0.311±0.122        | 0.522±0.016        | 0.246±0.133        | 0.157±0.068        |
| TRFM MLP                                                          | 0.681±0.010        | 0.698±0.012        | 0.513±0.017        | 0.514±0.016        | 0.491±0.014        | <b>0.540±0.020</b> | 0.278±0.023        |
| RNN RF                                                            | 0.707±0.013        | 0.695±0.005        | 0.557±0.003        | 0.448±0.014        | 0.548±0.031        | 0.379±0.010        | 0.257±0.025        |
| TRFM RF                                                           | 0.727±0.006        | 0.737±0.003        | 0.591±0.009        | 0.484±0.012        | 0.592±0.015        | 0.409±0.012        | 0.306±0.015        |
| CHEM-BERT                                                         | 0.697±0.014        | 0.702±0.012        | 0.508±0.045        | 0.335±0.123        | 0.530±0.036        | 0.263±0.118        | 0.178±0.080        |
| GROVER                                                            | <b>0.743±0.007</b> | 0.753±0.006        | <b>0.615±0.015</b> | 0.455±0.008        | <b>0.681±0.038</b> | 0.343±0.012        | 0.310±0.013        |
| ImageMol                                                          | 0.730±0.003        | <b>0.754±0.003</b> | 0.593±0.007        | <b>0.524±0.028</b> | 0.584±0.005        | 0.477±0.05         | <b>0.338±0.023</b> |
| 6. MERS Pseudotyped particle entry                                |                    |                    |                    |                    |                    |                    |                    |
|                                                                   | accuracy           | auc                | aupr               | f1                 | precision          | recall             | kappa              |
| MoCLR <sub>GIN</sub>                                              | 0.691±0.033        | 0.718±0.016        | 0.505±0.018        | <b>0.552±0.025</b> | 0.512±0.046        | <b>0.602±0.027</b> | 0.319±0.051        |
| MoCLR <sub>GCN</sub>                                              | 0.702±0.028        | 0.724±0.015        | 0.516±0.041        | 0.508±0.021        | 0.544±0.050        | 0.493±0.088        | 0.298±0.016        |
| RNN LR                                                            | 0.677±0.004        | 0.632±0.001        | 0.495±0.001        | 0.434±0.005        | 0.484±0.008        | 0.394±0.003        | 0.212±0.009        |
| TRFM LR                                                           | 0.683±0.000        | 0.721±0.000        | 0.567±0.000        | 0.482±0.000        | 0.497±0.000        | 0.468±0.000        | 0.254±0.000        |
| RNN MLP                                                           | 0.686±0.001        | 0.624±0.003        | 0.415±0.006        | 0.221±0.078        | 0.502±0.003        | 0.148±0.069        | 0.098±0.042        |
| TRFM MLP                                                          | 0.682±0.009        | 0.700±0.011        | 0.550±0.004        | 0.506±0.022        | 0.495±0.013        | 0.519±0.034        | 0.272±0.027        |
| RNN RF                                                            | 0.696±0.003        | 0.700±0.002        | 0.550±0.004        | 0.426±0.010        | 0.526±0.005        | 0.359±0.011        | 0.230±0.010        |
| TRFM RF                                                           | 0.722±0.003        | 0.740±0.000        | 0.606±0.005        | 0.487±0.015        | 0.582±0.010        | 0.419±0.026        | 0.303±0.010        |
| CHEM-BERT                                                         | 0.715±0.019        | 0.712±0.014        | 0.531±0.034        | 0.450±0.027        | 0.582±0.062        | 0.372±0.043        | 0.270±0.032        |
| GROVER                                                            | 0.739±0.005        | 0.757±0.006        | 0.625±0.021        | 0.519±0.046        | <b>0.647±0.017</b> | 0.439±0.068        | 0.357±0.038        |
| ImageMol                                                          | <b>0.742±0.006</b> | <b>0.764±0.009</b> | <b>0.633±0.002</b> | 0.542±0.05         | 0.622±0.041        | 0.499±0.119        | <b>0.368±0.031</b> |
| 7. SARS-CoV Pseudotyped particle entry (VeroE6 tox counterscreen) |                    |                    |                    |                    |                    |                    |                    |
|                                                                   | accuracy           | auc                | aupr               | f1                 | precision          | recall             | kappa              |
| MoCLR <sub>GIN</sub>                                              | 0.708±0.010        | 0.711±0.014        | 0.499±0.011        | <b>0.480±0.036</b> | 0.539±0.019        | 0.434±0.051        | 0.281±0.035        |
| MoCLR <sub>GCN</sub>                                              | 0.718±0.005        | 0.712±0.006        | 0.506±0.012        | 0.375±0.069        | 0.613±0.021        | 0.277±0.071        | 0.228±0.045        |

|                                                                   |                    |                    |                    |                    |                    |                    |                    |
|-------------------------------------------------------------------|--------------------|--------------------|--------------------|--------------------|--------------------|--------------------|--------------------|
| RNN LR                                                            | 0.686±0.000        | 0.621±0.000        | 0.434±0.000        | 0.319±0.000        | 0.495±0.000        | 0.236±0.000        | 0.148±0.000        |
| TRFM LR                                                           | 0.686±0.001        | 0.701±0.000        | 0.516±0.000        | 0.472±0.002        | 0.497±0.002        | <b>0.449±0.002</b> | 0.249±0.003        |
| RNN MLP                                                           | 0.681±0.004        | 0.595±0.008        | 0.385±0.012        | 0.142±0.011        | 0.445±0.030        | 0.085±0.008        | 0.046±0.006        |
| TRFM MLP                                                          | 0.696±0.007        | 0.649±0.017        | 0.455±0.005        | 0.425±0.021        | 0.486±0.016        | 0.379±0.023        | 0.223±0.024        |
| RNN RF                                                            | 0.680±0.007        | 0.644±0.004        | 0.498±0.003        | 0.355±0.016        | 0.479±0.018        | 0.282±0.015        | 0.161±0.019        |
| TRFM RF                                                           | 0.720±0.004        | 0.706±0.001        | 0.546±0.001        | 0.417±0.002        | 0.596±0.017        | 0.321±0.005        | 0.254±0.007        |
| CHEM-BERT                                                         | 0.702±0.014        | 0.686±0.010        | 0.510±0.021        | 0.449±0.028        | 0.538±0.033        | 0.393±0.061        | 0.253±0.012        |
| GROVER                                                            | 0.726±0.021        | 0.714±0.010        | <b>0.596±0.019</b> | 0.334±0.172        | <b>0.746±0.131</b> | 0.250±0.145        | 0.223±0.114        |
| ImageMoI                                                          | <b>0.733±0.008</b> | <b>0.732±0.005</b> | 0.572±0.024        | 0.475±0.016        | 0.618±0.031        | 0.388±0.030        | <b>0.308±0.014</b> |
| 8. SARS-CoV Pseudotyped particle entry                            |                    |                    |                    |                    |                    |                    |                    |
|                                                                   | accuracy           | auc                | aupr               | f1                 | precision          | recall             | kappa              |
| MoCLR <sub>GIN</sub>                                              | 0.702±0.001        | 0.713±0.007        | 0.490±0.022        | 0.426±0.036        | 0.522±0.001        | 0.363±0.053        | 0.235±0.026        |
| MoCLR <sub>GCN</sub>                                              | 0.731±0.013        | 0.722±0.012        | 0.562±0.022        | 0.457±0.054        | 0.596±0.021        | 0.373±0.062        | 0.292±0.052        |
| RNN LR                                                            | 0.702±0.000        | 0.636±0.000        | 0.444±0.000        | 0.336±0.000        | 0.533±0.000        | 0.245±0.000        | 0.176±0.000        |
| TRFM LR                                                           | 0.696±0.001        | 0.709±0.000        | 0.521±0.000        | 0.485±0.001        | 0.506±0.001        | 0.465±0.000        | 0.270±0.001        |
| RNN MLP                                                           | 0.695±0.004        | 0.611±0.006        | 0.397±0.011        | 0.225±0.083        | 0.518±0.025        | 0.152±0.073        | 0.107±0.044        |
| TRFM MLP                                                          | 0.663±0.012        | 0.642±0.019        | 0.448±0.012        | 0.449±0.013        | 0.452±0.019        | 0.447±0.018        | 0.206±0.021        |
| RNN RF                                                            | 0.686±0.006        | 0.652±0.005        | 0.485±0.011        | 0.382±0.017        | 0.483±0.015        | 0.317±0.021        | 0.184±0.017        |
| TRFM RF                                                           | 0.726±0.008        | 0.721±0.003        | 0.571±0.003        | 0.433±0.016        | 0.593±0.024        | 0.342±0.014        | 0.269±0.021        |
| CHEM-BERT                                                         | 0.710±0.005        | 0.691±0.010        | 0.510±0.043        | 0.297±0.168        | <b>0.703±0.176</b> | 0.252±0.209        | 0.181±0.093        |
| GROVER                                                            | 0.735±0.007        | 0.726±0.001        | <b>0.605±0.013</b> | 0.415±0.082        | 0.661±0.057        | 0.320±0.108        | 0.275±0.053        |
| ImageMoI                                                          | <b>0.736±0.003</b> | <b>0.739±0.001</b> | 0.572±0.017        | <b>0.528±0.035</b> | 0.587±0.018        | <b>0.487±0.070</b> | <b>0.348±0.027</b> |
| 9. SARS-CoV-2 cytopathic effect (CPE)                             |                    |                    |                    |                    |                    |                    |                    |
|                                                                   | accuracy           | auc                | aupr               | f1                 | precision          | recall             | kappa              |
| MoCLR <sub>GIN</sub>                                              | 0.713±0.011        | 0.702±0.014        | 0.484±0.022        | 0.376±0.067        | 0.544±0.032        | 0.292±0.072        | 0.214±0.055        |
| MoCLR <sub>GCN</sub>                                              | 0.717±0.013        | 0.704±0.015        | 0.517±0.023        | 0.393±0.090        | 0.558±0.046        | 0.318±0.115        | 0.233±0.071        |
| RNN LR                                                            | 0.707±0.000        | 0.612±0.000        | 0.458±0.001        | 0.328±0.000        | 0.535±0.000        | 0.237±0.000        | 0.175±0.000        |
| TRFM LR                                                           | 0.695±0.000        | 0.698±0.000        | 0.495±0.000        | 0.474±0.000        | 0.495±0.000        | 0.455±0.000        | 0.260±0.000        |
| RNN MLP                                                           | 0.698±0.004        | 0.609±0.013        | 0.404±0.011        | 0.218±0.037        | 0.509±0.023        | 0.141±0.033        | 0.101±0.013        |
| TRFM MLP                                                          | 0.673±0.006        | 0.658±0.007        | 0.458±0.012        | 0.488±0.010        | 0.464±0.008        | <b>0.515±0.011</b> | 0.249±0.013        |
| RNN RF                                                            | 0.688±0.007        | 0.640±0.007        | 0.462±0.007        | 0.357±0.006        | 0.474±0.017        | 0.287±0.013        | 0.167±0.008        |
| TRFM RF                                                           | <b>0.726±0.008</b> | 0.709±0.004        | <b>0.559±0.004</b> | 0.424±0.015        | 0.582±0.023        | 0.333±0.011        | 0.261±0.020        |
| CHEM-BERT                                                         | 0.705±0.012        | 0.707±0.007        | 0.533±0.008        | 0.419±0.055        | 0.525±0.029        | 0.362±0.093        | 0.234±0.032        |
| GROVER                                                            | 0.718±0.013        | 0.715±0.008        | <b>0.559±0.046</b> | 0.358±0.149        | <b>0.560±0.031</b> | 0.293±0.164        | 0.217±0.107        |
| ImageMoI                                                          | 0.709±0.006        | <b>0.723±0.003</b> | 0.539±0.009        | <b>0.5±0.024</b>   | 0.521±0.011        | 0.482±0.043        | <b>0.296±0.024</b> |
| 10. SARS-CoV-2 cytopathic effect (host tox counterscreen)         |                    |                    |                    |                    |                    |                    |                    |
|                                                                   | accuracy           | auc                | aupr               | f1                 | precision          | recall             | kappa              |
| MoCLR <sub>GIN</sub>                                              | 0.654±0.049        | 0.699±0.023        | 0.534±0.017        | 0.536±0.030        | 0.527±0.063        | <b>0.587±0.153</b> | 0.269±0.030        |
| MoCLR <sub>GCN</sub>                                              | 0.693±0.014        | 0.715±0.006        | 0.564±0.015        | 0.472±0.075        | 0.599±0.050        | 0.409±0.127        | 0.272±0.056        |
| RNN LR                                                            | 0.627±0.000        | 0.610±0.000        | 0.488±0.000        | 0.412±0.000        | 0.458±0.000        | 0.374±0.000        | 0.143±0.000        |
| TRFM LR                                                           | 0.671±0.000        | 0.712±0.000        | 0.574±0.000        | <b>0.544±0.000</b> | 0.527±0.000        | 0.561±0.000        | 0.287±0.000        |
| RNN MLP                                                           | 0.604±0.017        | 0.607±0.002        | 0.460±0.009        | 0.426±0.007        | 0.433±0.022        | 0.420±0.005        | 0.125±0.025        |
| TRFM MLP                                                          | 0.641±0.004        | 0.641±0.011        | 0.469±0.012        | 0.503±0.010        | 0.487±0.005        | 0.520±0.015        | 0.223±0.011        |
| RNN RF                                                            | 0.668±0.005        | 0.673±0.003        | 0.535±0.003        | 0.426±0.011        | 0.539±0.012        | 0.353±0.011        | 0.207±0.013        |
| TRFM RF                                                           | 0.692±0.006        | 0.721±0.004        | 0.607±0.006        | 0.493±0.010        | 0.580±0.012        | 0.428±0.008        | 0.278±0.014        |
| CHEM-BERT                                                         | 0.677±0.019        | 0.708±0.013        | 0.537±0.030        | 0.465±0.075        | 0.558±0.041        | 0.417±0.120        | 0.245±0.053        |
| GROVER                                                            | <b>0.698±0.005</b> | 0.729±0.000        | 0.612±0.001        | 0.399±0.011        | <b>0.660±0.033</b> | 0.287±0.017        | 0.237±0.003        |
| ImageMoI                                                          | 0.665±0.059        | <b>0.747±0.006</b> | <b>0.615±0.009</b> | 0.533±0.068        | 0.574±0.103        | 0.586±0.232        | <b>0.288±0.034</b> |
| 11. Spike-ACE2 protein-protein interaction (AlphaLISA)            |                    |                    |                    |                    |                    |                    |                    |
|                                                                   | accuracy           | auc                | aupr               | f1                 | precision          | recall             | kappa              |
| MoCLR <sub>GIN</sub>                                              | 0.686±0.006        | 0.718±0.010        | 0.628±0.015        | 0.532±0.021        | 0.663±0.024        | 0.447±0.039        | 0.309±0.013        |
| MoCLR <sub>GCN</sub>                                              | 0.676±0.004        | 0.721±0.006        | 0.628±0.006        | 0.470±0.043        | <b>0.687±0.029</b> | 0.362±0.055        | 0.269±0.022        |
| RNN LR                                                            | 0.615±0.000        | 0.603±0.000        | 0.524±0.000        | 0.421±0.000        | 0.531±0.000        | 0.348±0.000        | 0.151±0.000        |
| TRFM LR                                                           | 0.671±0.000        | 0.683±0.000        | 0.622±0.000        | 0.518±0.000        | 0.629±0.000        | 0.441±0.000        | 0.280±0.000        |
| RNN MLP                                                           | 0.606±0.016        | 0.569±0.019        | 0.484±0.025        | 0.289±0.107        | 0.558±0.058        | 0.220±0.124        | 0.093±0.023        |
| TRFM MLP                                                          | 0.607±0.006        | 0.641±0.009        | 0.563±0.009        | 0.535±0.017        | 0.510±0.007        | <b>0.564±0.047</b> | 0.196±0.003        |
| RNN RF                                                            | 0.653±0.004        | 0.645±0.005        | 0.581±0.007        | 0.457±0.002        | 0.614±0.012        | 0.363±0.004        | 0.225±0.007        |
| TRFM RF                                                           | 0.671±0.008        | 0.689±0.014        | 0.622±0.014        | 0.463±0.021        | 0.673±0.023        | 0.354±0.025        | 0.258±0.020        |
| CHEM-BERT                                                         | 0.619±0.016        | 0.616±0.072        | 0.530±0.064        | 0.222±0.208        | 0.423±0.305        | 0.181±0.194        | 0.101±0.093        |
| GROVER                                                            | 0.688±0.005        | 0.728±0.004        | <b>0.662±0.007</b> | 0.512±0.023        | 0.694±0.040        | 0.410±0.043        | 0.305±0.006        |
| ImageMoI                                                          | <b>0.694±0.005</b> | <b>0.739±0.001</b> | 0.642±0.012        | <b>0.553±0.014</b> | 0.666±0.007        | 0.473±0.02         | <b>0.330±0.013</b> |
| 12. Spike-ACE2 protein-protein interaction (TruHit Counterscreen) |                    |                    |                    |                    |                    |                    |                    |
|                                                                   | accuracy           | auc                | aupr               | f1                 | precision          | recall             | kappa              |
| MoCLR <sub>GIN</sub>                                              | 0.676±0.003        | 0.717±0.004        | 0.643±0.011        | 0.511±0.014        | 0.668±0.009        | 0.415±0.020        | 0.289±0.009        |
| MoCLR <sub>GCN</sub>                                              | 0.664±0.022        | 0.701±0.006        | 0.602±0.012        | 0.455±0.070        | 0.669±0.030        | 0.349±0.072        | 0.249±0.061        |
| RNN LR                                                            | 0.613±0.001        | 0.603±0.000        | 0.525±0.000        | 0.415±0.001        | 0.544±0.002        | 0.335±0.001        | 0.150±0.002        |
| TRFM LR                                                           | 0.650±0.000        | 0.668±0.000        | 0.605±0.000        | 0.497±0.001        | 0.602±0.001        | 0.423±0.001        | 0.241±0.001        |
| RNN MLP                                                           | 0.620±0.012        | 0.605±0.009        | 0.459±0.007        | 0.318±0.065        | 0.460±0.019        | 0.253±0.074        | 0.089±0.018        |
| TRFM MLP                                                          | 0.609±0.005        | 0.593±0.001        | 0.459±0.009        | 0.440±0.022        | 0.458±0.009        | 0.425±0.034        | 0.141±0.018        |
| RNN RF                                                            | 0.633±0.009        | 0.621±0.009        | 0.559±0.010        | 0.426±0.019        | 0.592±0.018        | 0.333±0.017        | 0.187±0.022        |
| TRFM RF                                                           | 0.652±0.005        | 0.680±0.003        | 0.610±0.005        | 0.437±0.009        | 0.645±0.013        | 0.331±0.007        | 0.221±0.012        |
| CHEM-BERT                                                         | 0.634±0.012        | 0.661±0.008        | 0.556±0.024        | 0.385±0.084        | 0.620±0.044        | 0.293±0.104        | 0.176±0.045        |
| GROVER                                                            | 0.673±0.002        | 0.699±0.004        | <b>0.649±0.003</b> | 0.521±0.009        | <b>0.650±0.011</b> | 0.436±0.017        | 0.288±0.004        |
| ImageMoI                                                          | <b>0.691±0.008</b> | <b>0.734±0.001</b> | 0.646±0.001        | <b>0.601±0.004</b> | 0.639±0.020        | <b>0.570±0.020</b> | <b>0.351±0.011</b> |
| 13. TMPRSS2 enzymatic activity                                    |                    |                    |                    |                    |                    |                    |                    |
|                                                                   | accuracy           | auc                | aupr               | f1                 | precision          | recall             | kappa              |
| MoCLR <sub>GIN</sub>                                              | 0.681±0.004        | 0.691±0.000        | 0.547±0.017        | 0.478±0.022        | 0.575±0.011        | 0.410±0.034        | 0.257±0.015        |
| MoCLR <sub>GCN</sub>                                              | 0.664±0.010        | 0.683±0.003        | 0.511±0.006        | 0.476±0.041        | 0.538±0.014        | 0.430±0.063        | 0.235±0.035        |
| RNN LR                                                            | 0.623±0.000        | 0.591±0.000        | 0.455±0.000        | 0.368±0.000        | 0.459±0.000        | 0.307±0.000        | 0.114±0.000        |
| TRFM LR                                                           | 0.647±0.000        | 0.678±0.000        | 0.533±0.000        | 0.490±0.000        | 0.506±0.000        | <b>0.475±0.000</b> | 0.220±0.000        |
| RNN MLP                                                           | 0.623±0.011        | 0.578±0.007        | 0.414±0.015        | 0.207±0.139        | 0.361±0.125        | 0.160±0.122        | 0.044±0.049        |
| TRFM MLP                                                          | 0.617±0.009        | 0.617±0.007        | 0.453±0.002        | 0.459±0.031        | 0.464±0.007        | 0.459±0.068        | 0.164±0.011        |
| RNN RF                                                            | 0.652±0.003        | 0.652±0.002        | 0.524±0.002        | 0.381±0.004        | 0.522±0.007        | 0.300±0.003        | 0.163±0.007        |
| TRFM RF                                                           | 0.680±0.008        | 0.689±0.004        | 0.571±0.010        | 0.449±0.015        | 0.583±0.016        | 0.366±0.013        | 0.240±0.019        |
| CHEM-BERT                                                         | 0.649±0.006        | 0.671±0.016        | 0.531±0.029        | 0.284±0.223        | 0.343±0.243        | 0.264±0.236        | 0.130±0.110        |

|          |                    |                    |                    |                    |                    |             |                    |
|----------|--------------------|--------------------|--------------------|--------------------|--------------------|-------------|--------------------|
| GROVER   | <b>0.695±0.008</b> | 0.705±0.002        | <b>0.619±0.009</b> | 0.501±0.038        | <b>0.602±0.007</b> | 0.431±0.053 | 0.291±0.033        |
| ImageMo1 | 0.692±0.001        | <b>0.714±0.002</b> | 0.582±0.015        | <b>0.515±0.017</b> | 0.589±0.008        | 0.459±0.032 | <b>0.295±0.010</b> |
