# Supplementary material for: Accurate prediction of molecular properties and drug targets using a self-supervised image representation learning framework
Source: Springer Nature journal article supplement (doi:10.1038/s42256-022-00557-6), 2022-11-17
Supplement: 42256_2022_557_MOESM17_ESM.pdf [file 42256_2022_557_MOESM17_ESM.pdf]

| Table S22: Screening results of approved drugs in DrugBank. DrugID corresponds to the drug id in DrugBank. pred_labels indicates whether it is a 3CL inhibitor (0 means no, 1 means yes). non-inhibitor_probs represents the probability of non-3CL inhibitors. inhibitor_probs represents the probability of 3CL inhibitors. Yellow background indicates evidence as a potential 3CL inhibitor |         |                               |             |                     |                 |                                                                                                                                                                                                                                                                                                                                                                                                                                                                                                                                                                                                                 |                                                                                                                                                                             |
|-------------------------------------------------------------------------------------------------------------------------------------------------------------------------------------------------------------------------------------------------------------------------------------------------------------------------------------------------------------------------------------------------|---------|-------------------------------|-------------|---------------------|-----------------|-----------------------------------------------------------------------------------------------------------------------------------------------------------------------------------------------------------------------------------------------------------------------------------------------------------------------------------------------------------------------------------------------------------------------------------------------------------------------------------------------------------------------------------------------------------------------------------------------------------------|-----------------------------------------------------------------------------------------------------------------------------------------------------------------------------|
| No.                                                                                                                                                                                                                                                                                                                                                                                             | DrugID  | Name                          | pred_labels | non-inhibitor_probs | inhibitor_probs | evidence description                                                                                                                                                                                                                                                                                                                                                                                                                                                                                                                                                                                            | evidence link                                                                                                                                                               |
| 1                                                                                                                                                                                                                                                                                                                                                                                               | DB14655 | Drostanolone propionate       | 1           | 1.37E-05            | 0.9999863       |                                                                                                                                                                                                                                                                                                                                                                                                                                                                                                                                                                                                                 |                                                                                                                                                                             |
| 2                                                                                                                                                                                                                                                                                                                                                                                               | DB13944 | Testosterone enanthate        | 1           | 2.49E-05            | 0.9999751       | We also tested the inhibitory activity of testosterone, and our results reveal testosterone as possessing moderate inhibitory potency against the 3CLpro enzyme, which may thus provide an explanation why older men are more severely affected by COVID-19.                                                                                                                                                                                                                                                                                                                                                    | <a href="https://www.ncbi.nlm.nih.gov/pmc/articles/PMC8007184/">https://www.ncbi.nlm.nih.gov/pmc/articles/PMC8007184/</a>                                                   |
| 3                                                                                                                                                                                                                                                                                                                                                                                               | DB01008 | Busulfan                      | 1           | 3.02E-05            | 0.9999697       |                                                                                                                                                                                                                                                                                                                                                                                                                                                                                                                                                                                                                 |                                                                                                                                                                             |
| 4                                                                                                                                                                                                                                                                                                                                                                                               | DB01216 | Finasteride                   | 1           | 3.32E-05            | 0.99996674      | To evaluate the effect of AR inhibition on ACE2 levels, we treated cardiac cells derived from two different hESC lines (WA09 and WA01) with the drug candidates that are known to inhibit AR signaling and observed significant reductions of ACE2 in a dose-dependent manner (Figures 3E-3G). Finasteride and dutasteride reduce AR signaling by inhibiting 5 alpha reductases, which are the enzymes that convert testosterone to an AR ligand and agonist, 5a-dihydrotestosterone (DHT). Treatment with these drugs resulted in a significant decrease in TMPRSS2 in addition to ACE2 (Figures S4A and S4E). | <a href="https://www.sciencedirect.com/science/article/pii/S1934590920305476">https://www.sciencedirect.com/science/article/pii/S1934590920305476</a>                       |
| 5                                                                                                                                                                                                                                                                                                                                                                                               | DB09160 | Technetium Tc-99m tetrofosmin | 1           | 4.45E-05            | 0.9999553       |                                                                                                                                                                                                                                                                                                                                                                                                                                                                                                                                                                                                                 |                                                                                                                                                                             |
| 6                                                                                                                                                                                                                                                                                                                                                                                               | DB11689 | Selumetinib                   | 1           | 7.05E-05            | 0.9999294       | ACE2, and TMPRSS2 protease promote SARS-CoV-2 infectivity, while inflammatory cytokines IL-6, or G-CSF worsen COVID-19 severity. We show MEK inhibitors (MEK1) VS-6766, trametinib and selumetinib reduce ACE2 expression in human cells.                                                                                                                                                                                                                                                                                                                                                                       | <a href="https://www.ncbi.nlm.nih.gov/pmc/articles/PMC7679035/">https://www.ncbi.nlm.nih.gov/pmc/articles/PMC7679035/</a>                                                   |
| 7                                                                                                                                                                                                                                                                                                                                                                                               | DB00225 | Gadodiamide                   | 1           | 7.25E-05            | 0.9999275       |                                                                                                                                                                                                                                                                                                                                                                                                                                                                                                                                                                                                                 |                                                                                                                                                                             |
| 8                                                                                                                                                                                                                                                                                                                                                                                               | DB13956 | Estradiol valerate            | 1           | 7.28E-05            | 0.99992716      | Estradiol has an established antiviral, anti-inflammatory, and immunomodulatory action in animal models. The epidemiological studies on COVID-19 have also suggested its possible protective role.                                                                                                                                                                                                                                                                                                                                                                                                              | <a href="https://www.ncbi.nlm.nih.gov/pmc/articles/PMC8569453/">https://www.ncbi.nlm.nih.gov/pmc/articles/PMC8569453/</a>                                                   |
| 9                                                                                                                                                                                                                                                                                                                                                                                               | DB00875 | Flupentixol                   | 1           | 7.98E-05            | 0.99992025      | Antiviral tests using native SARS-CoV-2 virus in Vero E6 cells confirmed that 7 of these drugs (clemastine, amiodarone, trimetoprim, bouthinib, toremifene, flupentixol, and azelastine) significantly inhibited SARS2 replication, reducing supernatant viral RNA load with a promising level of activity.                                                                                                                                                                                                                                                                                                     | <a href="https://www.nature.com/articles/s41401-020-00556-6">https://www.nature.com/articles/s41401-020-00556-6</a>                                                         |
| 10                                                                                                                                                                                                                                                                                                                                                                                              | DB00765 | Metyrosine                    | 1           | 8.02E-05            | 0.9999198       | Furthermore, the use of metyrosine can be very beneficial in patients with PPGL and COVID-19 because of its well known effect on catecholamine synthesis.                                                                                                                                                                                                                                                                                                                                                                                                                                                       | <a href="https://www.sciencedirect.com/science/article/pii/S2213858720303429">https://www.sciencedirect.com/science/article/pii/S2213858720303429</a>                       |
| 11                                                                                                                                                                                                                                                                                                                                                                                              | DB11609 | Normethadone                  | 1           | 8.46E-05            | 0.99991536      |                                                                                                                                                                                                                                                                                                                                                                                                                                                                                                                                                                                                                 |                                                                                                                                                                             |
| 12                                                                                                                                                                                                                                                                                                                                                                                              | DB13946 | Testosterone undecanoate      | 1           | 8.64E-05            | 0.9999136       | We also tested the inhibitory activity of testosterone, and our results reveal testosterone as possessing moderate inhibitory potency against the 3CLpro enzyme, which may thus provide an explanation why older men are more severely affected by COVID-19.                                                                                                                                                                                                                                                                                                                                                    | <a href="https://www.ncbi.nlm.nih.gov/pmc/articles/PMC8007184/">https://www.ncbi.nlm.nih.gov/pmc/articles/PMC8007184/</a>                                                   |
| 13                                                                                                                                                                                                                                                                                                                                                                                              | DB00621 | Oxandrolone                   | 1           | 9.62E-05            | 0.9999038       |                                                                                                                                                                                                                                                                                                                                                                                                                                                                                                                                                                                                                 |                                                                                                                                                                             |
| 14                                                                                                                                                                                                                                                                                                                                                                                              | DB00623 | Fluphenazine                  | 1           | 0.000126903         | 0.99987304      | Fluphenazine (sulfated nitrogenous compounds) may be considered promising COVID-19 protease inhibitors.                                                                                                                                                                                                                                                                                                                                                                                                                                                                                                         | <a href="https://journals.sagepub.com/doi/full/10.1177/2472555220950236">https://journals.sagepub.com/doi/full/10.1177/2472555220950236</a>                                 |
| 15                                                                                                                                                                                                                                                                                                                                                                                              | DB09389 | Norgestrel                    | 1           | 0.000134595         | 0.9998654       | In our study, Levonorgestrel, a synthetic progesterone, showed strong binding with a docking score of - 7.88 kcal/mol, but it was able to block just 1 residue of S-protein necessary for interaction with hACE2 (Supplementary Figures 2(I) and L). This could perhaps explain the relatively lower efficacy of progesterone in inhibiting SARS-CoV-2 infection (Gordon et al., 2020).                                                                                                                                                                                                                         | <a href="https://www.tandfonline.com/doi/full/10.1080/07391102.2021.1921034">https://www.tandfonline.com/doi/full/10.1080/07391102.2021.1921034</a>                         |
| 16                                                                                                                                                                                                                                                                                                                                                                                              | DB11967 | Binimetinib                   | 1           | 0.000146502         | 0.9998535       |                                                                                                                                                                                                                                                                                                                                                                                                                                                                                                                                                                                                                 |                                                                                                                                                                             |
| 17                                                                                                                                                                                                                                                                                                                                                                                              | DB11164 | Bicisate                      | 1           | 0.000152644         | 0.9998473       | the brain of 99mTc-bicisate (ECD)-single-photon emission computerized tomography/computerized tomography (SPECT/CT) was successfully utilized for diagnosis and management guidance of COVID-associated ischemia secondary to flare antiphospholipid syndrome.                                                                                                                                                                                                                                                                                                                                                  | <a href="https://www.thieme-connect.com/products/ejournals/html/10.4103/wjnm.wjnm.28.21">https://www.thieme-connect.com/products/ejournals/html/10.4103/wjnm.wjnm.28.21</a> |
| 18                                                                                                                                                                                                                                                                                                                                                                                              | DB09371 | Norethynodrel                 | 1           | 0.000169007         | 0.99983096      |                                                                                                                                                                                                                                                                                                                                                                                                                                                                                                                                                                                                                 |                                                                                                                                                                             |
| 19                                                                                                                                                                                                                                                                                                                                                                                              | DB01612 | Amyl Nitrite                  | 1           | 0.000178824         | 0.99982125      |                                                                                                                                                                                                                                                                                                                                                                                                                                                                                                                                                                                                                 |                                                                                                                                                                             |
| 20                                                                                                                                                                                                                                                                                                                                                                                              | DB00421 | Spirolactone                  | 1           | 0.000181721         | 0.99981827      | spironolactone seems to be an ideal candidate drug for the prophylactic and early treatment of SARS-CoV-2.                                                                                                                                                                                                                                                                                                                                                                                                                                                                                                      | <a href="https://www.ncbi.nlm.nih.gov/pmc/articles/PMC7363620/">https://www.ncbi.nlm.nih.gov/pmc/articles/PMC7363620/</a>                                                   |
| 21                                                                                                                                                                                                                                                                                                                                                                                              | DB00603 |                               | 1           | 0.000242011         | 0.99975795      |                                                                                                                                                                                                                                                                                                                                                                                                                                                                                                                                                                                                                 |                                                                                                                                                                             |
| 22                                                                                                                                                                                                                                                                                                                                                                                              | DB00999 |                               | 1           | 0.000246            | 0.999754        |                                                                                                                                                                                                                                                                                                                                                                                                                                                                                                                                                                                                                 |                                                                                                                                                                             |
| 23                                                                                                                                                                                                                                                                                                                                                                                              | DB00988 |                               | 1           | 0.000267323         | 0.9997327       |                                                                                                                                                                                                                                                                                                                                                                                                                                                                                                                                                                                                                 |                                                                                                                                                                             |
| 24                                                                                                                                                                                                                                                                                                                                                                                              | DB04898 |                               | 1           | 0.000270564         | 0.99972945      |                                                                                                                                                                                                                                                                                                                                                                                                                                                                                                                                                                                                                 |                                                                                                                                                                             |
| 25                                                                                                                                                                                                                                                                                                                                                                                              | DB01013 |                               | 1           | 0.000290232         | 0.9997098       |                                                                                                                                                                                                                                                                                                                                                                                                                                                                                                                                                                                                                 |                                                                                                                                                                             |
| 26                                                                                                                                                                                                                                                                                                                                                                                              | DB14669 |                               | 1           | 0.000330768         | 0.9996692       |                                                                                                                                                                                                                                                                                                                                                                                                                                                                                                                                                                                                                 |                                                                                                                                                                             |
| 27                                                                                                                                                                                                                                                                                                                                                                                              | DB00446 |                               | 1           | 0.00033641          | 0.9996636       |                                                                                                                                                                                                                                                                                                                                                                                                                                                                                                                                                                                                                 |                                                                                                                                                                             |
| 28                                                                                                                                                                                                                                                                                                                                                                                              | DB01222 |                               | 1           | 0.000356329         | 0.9996437       |                                                                                                                                                                                                                                                                                                                                                                                                                                                                                                                                                                                                                 |                                                                                                                                                                             |
| 29                                                                                                                                                                                                                                                                                                                                                                                              | DB00396 |                               | 1           | 0.000369098         | 0.9996309       |                                                                                                                                                                                                                                                                                                                                                                                                                                                                                                                                                                                                                 |                                                                                                                                                                             |
| 30                                                                                                                                                                                                                                                                                                                                                                                              | DB14542 |                               | 1           | 0.000396189         | 0.9996038       |                                                                                                                                                                                                                                                                                                                                                                                                                                                                                                                                                                                                                 |                                                                                                                                                                             |
| 31                                                                                                                                                                                                                                                                                                                                                                                              | DB00596 |                               | 1           | 0.000428315         | 0.9995716       |                                                                                                                                                                                                                                                                                                                                                                                                                                                                                                                                                                                                                 |                                                                                                                                                                             |
| 32                                                                                                                                                                                                                                                                                                                                                                                              | DB00351 |                               | 1           | 0.00048465          | 0.9995153       |                                                                                                                                                                                                                                                                                                                                                                                                                                                                                                                                                                                                                 |                                                                                                                                                                             |
| 33                                                                                                                                                                                                                                                                                                                                                                                              | DB00836 |                               | 1           | 0.000488697         | 0.9995136       |                                                                                                                                                                                                                                                                                                                                                                                                                                                                                                                                                                                                                 |                                                                                                                                                                             |
| 34                                                                                                                                                                                                                                                                                                                                                                                              | DB14631 |                               | 1           | 0.000505895         | 0.9994941       |                                                                                                                                                                                                                                                                                                                                                                                                                                                                                                                                                                                                                 |                                                                                                                                                                             |
| 35                                                                                                                                                                                                                                                                                                                                                                                              | DB00378 |                               | 1           | 0.000536558         | 0.9994635       |                                                                                                                                                                                                                                                                                                                                                                                                                                                                                                                                                                                                                 |                                                                                                                                                                             |
| 36                                                                                                                                                                                                                                                                                                                                                                                              | DB09378 |                               | 1           | 0.000561811         | 0.9994382       |                                                                                                                                                                                                                                                                                                                                                                                                                                                                                                                                                                                                                 |                                                                                                                                                                             |
| 37                                                                                                                                                                                                                                                                                                                                                                                              | DB00846 |                               | 1           | 0.000579236         | 0.99942076      |                                                                                                                                                                                                                                                                                                                                                                                                                                                                                                                                                                                                                 |                                                                                                                                                                             |
| 38                                                                                                                                                                                                                                                                                                                                                                                              | DB00180 |                               | 1           | 0.000618646         | 0.9993813       |                                                                                                                                                                                                                                                                                                                                                                                                                                                                                                                                                                                                                 |                                                                                                                                                                             |
| 39                                                                                                                                                                                                                                                                                                                                                                                              | DB00959 |                               | 1           | 0.000632255         | 0.9993678       |                                                                                                                                                                                                                                                                                                                                                                                                                                                                                                                                                                                                                 |                                                                                                                                                                             |
| 40                                                                                                                                                                                                                                                                                                                                                                                              | DB14596 |                               | 1           | 0.000650965         | 0.9993499       |                                                                                                                                                                                                                                                                                                                                                                                                                                                                                                                                                                                                                 |                                                                                                                                                                             |
| 41                                                                                                                                                                                                                                                                                                                                                                                              | DB00678 |                               | 1           | 0.000663679         | 0.9993394       |                                                                                                                                                                                                                                                                                                                                                                                                                                                                                                                                                                                                                 |                                                                                                                                                                             |
| 42                                                                                                                                                                                                                                                                                                                                                                                              | DB00873 |                               | 1           | 0.000713167         | 0.99928683      |                                                                                                                                                                                                                                                                                                                                                                                                                                                                                                                                                                                                                 |                                                                                                                                                                             |
| 43                                                                                                                                                                                                                                                                                                                                                                                              | DB00635 |                               | 1           | 0.000721794         | 0.99927825      |                                                                                                                                                                                                                                                                                                                                                                                                                                                                                                                                                                                                                 |                                                                                                                                                                             |
| 44                                                                                                                                                                                                                                                                                                                                                                                              | DB09116 |                               | 1           | 0.00072446          | 0.9992755       |                                                                                                                                                                                                                                                                                                                                                                                                                                                                                                                                                                                                                 |                                                                                                                                                                             |
| 45                                                                                                                                                                                                                                                                                                                                                                                              | DB01303 |                               | 1           | 0.000729132         | 0.99927086      |                                                                                                                                                                                                                                                                                                                                                                                                                                                                                                                                                                                                                 |                                                                                                                                                                             |
| 46                                                                                                                                                                                                                                                                                                                                                                                              | DB00190 |                               | 1           | 0.000731978         | 0.999268        |                                                                                                                                                                                                                                                                                                                                                                                                                                                                                                                                                                                                                 |                                                                                                                                                                             |
| 47                                                                                                                                                                                                                                                                                                                                                                                              | DB01420 |                               | 1           | 0.00077121          | 0.99922884      |                                                                                                                                                                                                                                                                                                                                                                                                                                                                                                                                                                                                                 |                                                                                                                                                                             |
| 48                                                                                                                                                                                                                                                                                                                                                                                              | DB06203 |                               | 1           | 0.000790885         | 0.9992061       |                                                                                                                                                                                                                                                                                                                                                                                                                                                                                                                                                                                                                 |                                                                                                                                                                             |
| 49                                                                                                                                                                                                                                                                                                                                                                                              | DB00342 |                               | 1           | 0.00079128          | 0.99920875      |                                                                                                                                                                                                                                                                                                                                                                                                                                                                                                                                                                                                                 |                                                                                                                                                                             |
| 50                                                                                                                                                                                                                                                                                                                                                                                              | DB11486 |                               | 1           | 0.000844775         | 0.9991653       |                                                                                                                                                                                                                                                                                                                                                                                                                                                                                                                                                                                                                 |                                                                                                                                                                             |
| 51                                                                                                                                                                                                                                                                                                                                                                                              | DB09425 |                               | 1           | 0.000833972         | 0.9991666       |                                                                                                                                                                                                                                                                                                                                                                                                                                                                                                                                                                                                                 |                                                                                                                                                                             |
| 52                                                                                                                                                                                                                                                                                                                                                                                              | DB13158 |                               | 1           | 0.000851253         | 0.9991487       |                                                                                                                                                                                                                                                                                                                                                                                                                                                                                                                                                                                                                 |                                                                                                                                                                             |
| 53                                                                                                                                                                                                                                                                                                                                                                                              | DB09091 |                               | 1           | 0.000907914         | 0.9990921       |                                                                                                                                                                                                                                                                                                                                                                                                                                                                                                                                                                                                                 |                                                                                                                                                                             |
| 54                                                                                                                                                                                                                                                                                                                                                                                              | DB09070 |                               | 1           | 0.000979191         | 0.9990208       |                                                                                                                                                                                                                                                                                                                                                                                                                                                                                                                                                                                                                 |                                                                                                                                                                             |
| 55                                                                                                                                                                                                                                                                                                                                                                                              | DB00860 |                               | 1           | 0.000985204         | 0.99901474      |                                                                                                                                                                                                                                                                                                                                                                                                                                                                                                                                                                                                                 |                                                                                                                                                                             |
| 56                                                                                                                                                                                                                                                                                                                                                                                              | DB00880 |                               | 1           | 0.000991489         | 0.9990086       |                                                                                                                                                                                                                                                                                                                                                                                                                                                                                                                                                                                                                 |                                                                                                                                                                             |
| 57                                                                                                                                                                                                                                                                                                                                                                                              | DB14657 |                               | 1           | 0.001070326         | 0.9989297       |                                                                                                                                                                                                                                                                                                                                                                                                                                                                                                                                                                                                                 |                                                                                                                                                                             |
| 58                                                                                                                                                                                                                                                                                                                                                                                              | DB00067 |                               | 1           | 0.001108149         | 0.9988919       |                                                                                                                                                                                                                                                                                                                                                                                                                                                                                                                                                                                                                 |                                                                                                                                                                             |
| 59                                                                                                                                                                                                                                                                                                                                                                                              | DB00741 |                               | 1           | 0.00112599          | 0.9988874       |                                                                                                                                                                                                                                                                                                                                                                                                                                                                                                                                                                                                                 |                                                                                                                                                                             |
| 60                                                                                                                                                                                                                                                                                                                                                                                              | DB15467 |                               | 1           | 0.001133519         | 0.9988656       |                                                                                                                                                                                                                                                                                                                                                                                                                                                                                                                                                                                                                 |                                                                                                                                                                             |
| 61                                                                                                                                                                                                                                                                                                                                                                                              | DB00721 |                               | 1           | 0.001267092         | 0.99873286      |                                                                                                                                                                                                                                                                                                                                                                                                                                                                                                                                                                                                                 |                                                                                                                                                                             |
| 62                                                                                                                                                                                                                                                                                                                                                                                              | DB11140 |                               | 1           | 0.001311332         | 0.99868864      |                                                                                                                                                                                                                                                                                                                                                                                                                                                                                                                                                                                                                 |                                                                                                                                                                             |
| 63                                                                                                                                                                                                                                                                                                                                                                                              | DB00990 |                               | 1           | 0.001376982         | 0.998623        |                                                                                                                                                                                                                                                                                                                                                                                                                                                                                                                                                                                                                 |                                                                                                                                                                             |
| 64                                                                                                                                                                                                                                                                                                                                                                                              | DB08906 |                               | 1           | 0.001380654         | 0.9986193       |                                                                                                                                                                                                                                                                                                                                                                                                                                                                                                                                                                                                                 |                                                                                                                                                                             |
| 65                                                                                                                                                                                                                                                                                                                                                                                              | DB00670 |                               | 1           | 0.001391075         | 0.998609        |                                                                                                                                                                                                                                                                                                                                                                                                                                                                                                                                                                                                                 |                                                                                                                                                                             |
| 66                                                                                                                                                                                                                                                                                                                                                                                              | DB11104 |                               | 1           | 0.001433831         | 0.9985662       |                                                                                                                                                                                                                                                                                                                                                                                                                                                                                                                                                                                                                 |                                                                                                                                                                             |
| 67                                                                                                                                                                                                                                                                                                                                                                                              | DB14177 |                               | 1           | 0.001437128         | 0.9985629       |                                                                                                                                                                                                                                                                                                                                                                                                                                                                                                                                                                                                                 |                                                                                                                                                                             |
| 68                                                                                                                                                                                                                                                                                                                                                                                              | DB01130 |                               | 1           | 0.001515532         | 0.99848443      |                                                                                                                                                                                                                                                                                                                                                                                                                                                                                                                                                                                                                 |                                                                                                                                                                             |
| 69                                                                                                                                                                                                                                                                                                                                                                                              | DB00835 |                               | 1           | 0.001590223         | 0.99840975      |                                                                                                                                                                                                                                                                                                                                                                                                                                                                                                                                                                                                                 |                                                                                                                                                                             |
| 70                                                                                                                                                                                                                                                                                                                                                                                              | DB01114 |                               | 1           | 0.00166218          | 0.99833773      |                                                                                                                                                                                                                                                                                                                                                                                                                                                                                                                                                                                                                 |                                                                                                                                                                             |
| 71                                                                                                                                                                                                                                                                                                                                                                                              | DB14649 |                               | 1           | 0.001687765         | 0.9983322       |                                                                                                                                                                                                                                                                                                                                                                                                                                                                                                                                                                                                                 |                                                                                                                                                                             |
| 72                                                                                                                                                                                                                                                                                                                                                                                              | DB00456 |                               | 1           | 0.001691141         | 0.9983089       |                                                                                                                                                                                                                                                                                                                                                                                                                                                                                                                                                                                                                 |                                                                                                                                                                             |
| 73                                                                                                                                                                                                                                                                                                                                                                                              | DB00591 |                               | 1           | 0.001700629         | 0.9982994       |                                                                                                                                                                                                                                                                                                                                                                                                                                                                                                                                                                                                                 |                                                                                                                                                                             |
| 74                                                                                                                                                                                                                                                                                                                                                                                              | DB00253 |                               | 1           | 0.001756497         | 0.9982436       |                                                                                                                                                                                                                                                                                                                                                                                                                                                                                                                                                                                                                 |                                                                                                                                                                             |
| 75                                                                                                                                                                                                                                                                                                                                                                                              | DB11750 |                               | 1           | 0.001785629         | 0.99821436      |                                                                                                                                                                                                                                                                                                                                                                                                                                                                                                                                                                                                                 |                                                                                                                                                                             |
| 76                                                                                                                                                                                                                                                                                                                                                                                              | DB00787 |                               | 1           | 0.00186036          | 0.9981396       |                                                                                                                                                                                                                                                                                                                                                                                                                                                                                                                                                                                                                 |                                                                                                                                                                             |
| 77                                                                                                                                                                                                                                                                                                                                                                                              | DB14540 |                               | 1           | 0.00192054          | 0.9980794       |                                                                                                                                                                                                                                                                                                                                                                                                                                                                                                                                                                                                                 |                                                                                                                                                                             |
| 78                                                                                                                                                                                                                                                                                                                                                                                              | DB06147 |                               | 1           | 0.001948497         | 0.9980515       |                                                                                                                                                                                                                                                                                                                                                                                                                                                                                                                                                                                                                 |                                                                                                                                                                             |
| 79                                                                                                                                                                                                                                                                                                                                                                                              | DB09152 |                               | 1           | 0.001955458         | 0.9980445       |                                                                                                                                                                                                                                                                                                                                                                                                                                                                                                                                                                                                                 |                                                                                                                                                                             |
| 80                                                                                                                                                                                                                                                                                                                                                                                              | DB14975 |                               | 1           | 0.002027056         | 0.9979729       |                                                                                                                                                                                                                                                                                                                                                                                                                                                                                                                                                                                                                 |                                                                                                                                                                             |

|     |         |  |   |             |            |
|-----|---------|--|---|-------------|------------|
| 81  | DR00443 |  | 1 | 0.002072315 | 0.99792767 |
| 82  | DR00240 |  | 1 | 0.002081653 | 0.9979183  |
| 83  | DR04832 |  | 1 | 0.002090983 | 0.99790907 |
| 84  | DR12293 |  | 1 | 0.002153494 | 0.9978465  |
| 85  | DR01181 |  | 1 | 0.002156131 | 0.99784386 |
| 86  | DR09094 |  | 1 | 0.002163389 | 0.99783865 |
| 87  | DR00687 |  | 1 | 0.002206654 | 0.9977933  |
| 88  | DR12945 |  | 1 | 0.002228415 | 0.99777156 |
| 89  | DR06786 |  | 1 | 0.002248013 | 0.997752   |
| 90  | DR01172 |  | 1 | 0.002288686 | 0.9977113  |
| 91  | DR08973 |  | 1 | 0.002306682 | 0.99761933 |
| 92  | DR09315 |  | 1 | 0.002421194 | 0.9975788  |
| 93  | DR09383 |  | 1 | 0.002468792 | 0.99753124 |
| 94  | DR00223 |  | 1 | 0.002485839 | 0.9975141  |
| 95  | DR09124 |  | 1 | 0.002509558 | 0.9974994  |
| 96  | DR12499 |  | 1 | 0.002529314 | 0.9974735  |
| 97  | DR00408 |  | 1 | 0.002506659 | 0.99739337 |
| 98  | DR01223 |  | 1 | 0.002676044 | 0.9973239  |
| 99  | DR09209 |  | 1 | 0.002701375 | 0.99729866 |
| 100 | DR00896 |  | 1 | 0.002714144 | 0.99728584 |
| 101 | DR13270 |  | 1 | 0.00274214  | 0.9972579  |
| 102 | DR13258 |  | 1 | 0.002759871 | 0.99724007 |
| 103 | DR11135 |  | 1 | 0.002891549 | 0.9971085  |
| 104 | DR09134 |  | 1 | 0.002895017 | 0.99710394 |
| 105 | DR06710 |  | 1 | 0.002949455 | 0.9970505  |
| 106 | DR15934 |  | 1 | 0.002965447 | 0.99703455 |
| 107 | DR01064 |  | 1 | 0.002986471 | 0.99701357 |
| 108 | DR00995 |  | 1 | 0.003053045 | 0.996947   |
| 109 | DR11678 |  | 1 | 0.003076063 | 0.99692386 |
| 110 | DR09015 |  | 1 | 0.003086602 | 0.99691343 |
| 111 | DR13256 |  | 1 | 0.003110073 | 0.9968899  |
| 112 | DR00364 |  | 1 | 0.003114443 | 0.9968856  |
| 113 | DR04920 |  | 1 | 0.003185488 | 0.99681455 |
| 114 | DR00391 |  | 1 | 0.00321237  | 0.99678767 |
| 115 | DR01480 |  | 1 | 0.00324702  | 0.99676528 |
| 116 | DR00705 |  | 1 | 0.003278067 | 0.9967219  |
| 117 | DR08964 |  | 1 | 0.003279079 | 0.99672097 |
| 118 | DR00276 |  | 1 | 0.003420714 | 0.99657923 |
| 119 | DR03619 |  | 1 | 0.003508024 | 0.99649197 |
| 120 | DR09372 |  | 1 | 0.003555713 | 0.9964443  |
| 121 | DR00202 |  | 1 | 0.003599248 | 0.9964007  |
| 122 | DR09461 |  | 1 | 0.003713416 | 0.99628663 |
| 123 | DR01234 |  | 1 | 0.003784606 | 0.9962154  |
| 124 | DR09074 |  | 1 | 0.003851579 | 0.99614847 |
| 125 | DR02821 |  | 1 | 0.003880777 | 0.99611928 |
| 126 | DR11148 |  | 1 | 0.003894192 | 0.99610573 |
| 127 | DR00576 |  | 1 | 0.003901786 | 0.99609816 |
| 128 | DR00761 |  | 1 | 0.003991522 | 0.9960085  |
| 129 | DR01211 |  | 1 | 0.003998708 | 0.9960013  |
| 130 | DR00791 |  | 1 | 0.004080205 | 0.9959198  |
| 131 | DR04348 |  | 1 | 0.00415954  | 0.9958405  |
| 132 | DR00769 |  | 1 | 0.004321216 | 0.99567884 |
| 133 | DR08936 |  | 1 | 0.004375514 | 0.9956245  |
| 134 | DR14033 |  | 1 | 0.004489806 | 0.9955101  |
| 135 | DR00534 |  | 1 | 0.004552672 | 0.9953473  |
| 136 | DR00207 |  | 1 | 0.004673799 | 0.99532616 |
| 137 | DR00588 |  | 1 | 0.004716639 | 0.9952833  |
| 138 | DR00977 |  | 1 | 0.004852699 | 0.9951473  |
| 139 | DR05541 |  | 1 | 0.004986543 | 0.9950134  |
| 140 | DR01625 |  | 1 | 0.005181763 | 0.9948183  |
| 141 | DR06412 |  | 1 | 0.00519287  | 0.9948072  |
| 142 | DR00774 |  | 1 | 0.005287297 | 0.9947127  |
| 143 | DR01407 |  | 1 | 0.005410481 | 0.99458957 |
| 144 | DR00478 |  | 1 | 0.005430424 | 0.9945096  |
| 145 | DR01236 |  | 1 | 0.005651947 | 0.9943481  |
| 146 | DR01558 |  | 1 | 0.005635046 | 0.994065   |
| 147 | DR01623 |  | 1 | 0.006082917 | 0.99391705 |
| 148 | DR00556 |  | 1 | 0.006235654 | 0.9937643  |
| 149 | DR12865 |  | 1 | 0.006267482 | 0.9937325  |
| 150 | DR00624 |  | 1 | 0.006269778 | 0.9937302  |
| 151 | DR00985 |  | 1 | 0.006470515 | 0.9935295  |
| 152 | DR01610 |  | 1 | 0.006713863 | 0.9932861  |
| 153 | DR13076 |  | 1 | 0.006828602 | 0.9931733  |
| 154 | DR13882 |  | 1 | 0.006846115 | 0.9931539  |
| 155 | DR13887 |  | 1 | 0.007121174 | 0.9928786  |
| 156 | DR11859 |  | 1 | 0.007187348 | 0.9928127  |
| 157 | DR09443 |  | 1 | 0.007189689 | 0.99281037 |
| 158 | DR00998 |  | 1 | 0.007244668 | 0.99275535 |
| 159 | DR06154 |  | 1 | 0.007365756 | 0.99263424 |
| 160 | DR14656 |  | 1 | 0.007521113 | 0.99247885 |
| 161 | DR14543 |  | 1 | 0.00784608  | 0.99215394 |
| 162 | DR00783 |  | 1 | 0.008282217 | 0.9917178  |
| 163 | DR00345 |  | 1 | 0.008303573 | 0.9913694  |
| 164 | DR00444 |  | 1 | 0.00837395  | 0.99121255 |
| 165 | DR14539 |  | 1 | 0.00837918  | 0.99116206 |
| 166 | DR09164 |  | 1 | 0.008897102 | 0.99110293 |
| 167 | DR15566 |  | 1 | 0.009110301 | 0.9908897  |
| 168 | DR00476 |  | 1 | 0.009344881 | 0.9906651  |
| 169 | DR00663 |  | 1 | 0.009388292 | 0.9906173  |
| 170 | DR01370 |  | 1 | 0.009645511 | 0.99035454 |
| 171 | DR09225 |  | 1 | 0.009766751 | 0.9902332  |
| 172 | DR13146 |  | 1 | 0.009806576 | 0.9901934  |
| 173 | DR02843 |  | 1 | 0.010233202 | 0.98977885 |
| 174 | DR12723 |  | 1 | 0.010339301 | 0.98966074 |
| 175 | DR09145 |  | 1 | 0.010619454 | 0.9893805  |
| 176 | DR13163 |  | 1 | 0.010743952 | 0.989256   |
| 177 | DR14528 |  | 1 | 0.012140294 | 0.98785967 |
| 178 | DR01078 |  | 1 | 0.012149825 | 0.9878501  |
| 179 | DR00284 |  | 1 | 0.012388253 | 0.9876117  |
| 180 | DR00718 |  | 1 | 0.012419608 | 0.9875804  |
| 181 | DR12982 |  | 1 | 0.012523827 | 0.98747617 |
| 182 | DR14512 |  | 1 | 0.012566095 | 0.98743385 |
| 183 | DR00405 |  | 1 | 0.012658994 | 0.987341   |
| 184 | DR09561 |  | 1 | 0.012661199 | 0.9873388  |
| 185 | DR15906 |  | 1 | 0.012906548 | 0.9870934  |
| 186 | DR09332 |  | 1 | 0.013474441 | 0.98652554 |
| 187 | DR12911 |  | 1 | 0.01369271  | 0.9863073  |
| 188 | DR09325 |  | 1 | 0.013757387 | 0.98624265 |
| 189 | DR06796 |  | 1 | 0.013913032 | 0.9860869  |
| 190 | DR00620 |  | 1 | 0.014138563 | 0.9858614  |
| 191 | DR03017 |  | 1 | 0.014254678 | 0.9857453  |
| 192 | DR00435 |  | 1 | 0.014294189 | 0.9856058  |
| 193 | DR14723 |  | 1 | 0.014469812 | 0.9855929  |
| 194 | DR09152 |  | 1 | 0.014665994 | 0.9853349  |
| 195 | DR00431 |  | 1 | 0.01496857  | 0.98503137 |
| 196 | DR11183 |  | 1 | 0.015743958 | 0.9842561  |
| 197 | DR11134 |  | 1 | 0.017219651 | 0.98278034 |
| 198 | DR00899 |  | 1 | 0.01732431  | 0.9826757  |
| 199 | DR04038 |  | 1 | 0.017404672 | 0.9825953  |
| 200 | DR13995 |  | 1 | 0.017708898 | 0.9822911  |
| 201 | DR09479 |  | 1 | 0.018136848 | 0.9818632  |
| 202 | DR09531 |  | 1 | 0.01825567  | 0.98174435 |
| 203 | DR00300 |  | 1 | 0.018434789 | 0.9815652  |
| 204 | DR13871 |  | 1 | 0.018888814 | 0.9810131  |
| 205 | DR00259 |  | 1 | 0.019218182 | 0.9807818  |
| 206 | DR11589 |  | 1 | 0.01932637  | 0.9806737  |
| 207 | DR13245 |  | 1 | 0.020084096 | 0.97991586 |
| 208 | DR01324 |  | 1 | 0.02010954  | 0.97989047 |
| 209 | DR09054 |  | 1 | 0.020363767 | 0.9796362  |
| 210 | DR05630 |  | 1 | 0.020536715 | 0.9794632  |
| 211 | DR08824 |  | 1 | 0.020541964 | 0.9794581  |
| 212 | DR13139 |  | 1 | 0.02084136  | 0.9790158  |
| 213 | DR03527 |  | 1 | 0.021351354 | 0.9786486  |
| 214 | DR05273 |  | 1 | 0.021689148 | 0.97833085 |
| 215 | DR12001 |  | 1 | 0.021988364 | 0.9780116  |

|     |         |  |   |             |            |
|-----|---------|--|---|-------------|------------|
| 216 | DB11760 |  | 1 | 0.022059716 | 0.97794026 |
| 217 | DB00312 |  | 1 | 0.022308566 | 0.9776914  |
| 218 | DB00288 |  | 1 | 0.022657005 | 0.97734296 |
| 219 | DB00433 |  | 1 | 0.022986584 | 0.977013   |
| 220 | DB09321 |  | 1 | 0.02334857  | 0.9766515  |
| 221 | DB13156 |  | 1 | 0.02369386  | 0.9762965  |
| 222 | DB01072 |  | 1 | 0.024061728 | 0.9759432  |
| 223 | DB01133 |  | 1 | 0.024453756 | 0.9755963  |
| 224 | DB00850 |  | 1 | 0.024860291 | 0.9752556  |
| 225 | DB01092 |  | 1 | 0.02528112  | 0.9749211  |
| 226 | DB13116 |  | 1 | 0.02571544  | 0.9745926  |
| 227 | DB00539 |  | 1 | 0.02616324  | 0.9742701  |
| 228 | DB01357 |  | 1 | 0.02662551  | 0.9739536  |
| 229 | DB00412 |  | 1 | 0.02710224  | 0.9736431  |
| 230 | DB01194 |  | 1 | 0.02759351  | 0.9733386  |
| 231 | DB01545 |  | 1 | 0.02809924  | 0.9730401  |
| 232 | DB01047 |  | 1 | 0.02861951  | 0.9727476  |
| 233 | DB11921 |  | 1 | 0.02915424  | 0.9724611  |
| 234 | DB01320 |  | 1 | 0.02970351  | 0.9721806  |
| 235 | DB08816 |  | 1 | 0.02926356  | 0.9719061  |
| 236 | DB06811 |  | 1 | 0.02721238  | 0.97278756 |
| 237 | DB09517 |  | 1 | 0.027443174 | 0.9725568  |
| 238 | DB00499 |  | 1 | 0.027621951 | 0.972378   |
| 239 | DB01380 |  | 1 | 0.027752817 | 0.9722472  |
| 240 | DB09146 |  | 1 | 0.027897393 | 0.9721264  |
| 241 | DB06777 |  | 1 | 0.028112605 | 0.9719874  |
| 242 | DB00782 |  | 1 | 0.028287138 | 0.9718283  |
| 243 | DB00358 |  | 1 | 0.028478934 | 0.9716494  |
| 244 | DB09353 |  | 1 | 0.02863158  | 0.9714505  |
| 245 | DB11248 |  | 1 | 0.028794392 | 0.9712316  |
| 246 | DB01592 |  | 1 | 0.028961976 | 0.9710027  |
| 247 | DB11141 |  | 1 | 0.02913537  | 0.9707638  |
| 248 | DB08818 |  | 1 | 0.029314416 | 0.9705149  |
| 249 | DB01217 |  | 1 | 0.02950919  | 0.9702560  |
| 250 | DB06718 |  | 1 | 0.029719533 | 0.9700071  |
| 251 | DB09327 |  | 1 | 0.030872624 | 0.9697582  |
| 252 | DB14520 |  | 1 | 0.03137149  | 0.9695093  |
| 253 | DB00280 |  | 1 | 0.031958003 | 0.9692604  |
| 254 | DB01582 |  | 1 | 0.03265963  | 0.9690115  |
| 255 | DB09364 |  | 1 | 0.032664195 | 0.9687626  |
| 256 | DB11602 |  | 1 | 0.03272804  | 0.9685137  |
| 257 | DB00261 |  | 1 | 0.032220958 | 0.9682648  |
| 258 | DB09316 |  | 1 | 0.034188613 | 0.9680159  |
| 259 | DB11136 |  | 1 | 0.034265157 | 0.9677670  |
| 260 | DB00606 |  | 1 | 0.034408694 | 0.9675181  |
| 261 | DB11346 |  | 1 | 0.03467087  | 0.9672692  |
| 262 | DB00366 |  | 1 | 0.0350226   | 0.9670203  |
| 263 | DB09132 |  | 1 | 0.035065103 | 0.9667714  |
| 264 | DB14646 |  | 1 | 0.035101943 | 0.9665225  |
| 265 | DB08947 |  | 1 | 0.036358677 | 0.9662736  |
| 266 | DB08867 |  | 1 | 0.036606018 | 0.9660247  |
| 267 | DB01698 |  | 1 | 0.036743246 | 0.9657758  |
| 268 | DB01395 |  | 1 | 0.0370107   | 0.9655269  |
| 269 | DB00686 |  | 1 | 0.03720874  | 0.9652780  |
| 270 | DB00143 |  | 1 | 0.037657186 | 0.9650291  |
| 271 | DB11246 |  | 1 | 0.037759006 | 0.9647802  |
| 272 | DB00766 |  | 1 | 0.0380173   | 0.9645313  |
| 273 | DB08884 |  | 1 | 0.03836501  | 0.9642824  |
| 274 | DB13949 |  | 1 | 0.03861557  | 0.9640335  |
| 275 | DB11677 |  | 1 | 0.038656376 | 0.9637846  |
| 276 | DB13179 |  | 1 | 0.039340414 | 0.9635357  |
| 277 | DB09130 |  | 1 | 0.03936578  | 0.9632868  |
| 278 | DB09278 |  | 1 | 0.03944751  | 0.9630379  |
| 279 | DB14084 |  | 1 | 0.039457913 | 0.9627890  |
| 280 | DB14173 |  | 1 | 0.040039074 | 0.9625401  |
| 281 | DB12091 |  | 1 | 0.04042919  | 0.9622912  |
| 282 | DB01001 |  | 1 | 0.040540457 | 0.9620423  |
| 283 | DB00808 |  | 1 | 0.041462824 | 0.9617934  |
| 284 | DB01593 |  | 1 | 0.04157814  | 0.9615445  |
| 285 | DB14488 |  | 1 | 0.041873526 | 0.9612956  |
| 286 | DB09487 |  | 1 | 0.04261942  | 0.9610467  |
| 287 | DB04820 |  | 1 | 0.042888335 | 0.9607978  |
| 288 | DB00748 |  | 1 | 0.043146517 | 0.9605489  |
| 289 | DB06013 |  | 1 | 0.043366294 | 0.9603000  |
| 290 | DB01203 |  | 1 | 0.043519303 | 0.9600511  |
| 291 | DB01378 |  | 1 | 0.043657206 | 0.9598022  |
| 292 | DB15950 |  | 1 | 0.043735236 | 0.9595533  |
| 293 | DB09267 |  | 1 | 0.043975428 | 0.9593044  |
| 294 | DB00831 |  | 1 | 0.045418937 | 0.9590555  |
| 295 | DB11126 |  | 1 | 0.04587694  | 0.9588066  |
| 296 | DB00477 |  | 1 | 0.0479377   | 0.9585577  |
| 297 | DB12457 |  | 1 | 0.048100755 | 0.9583088  |
| 298 | DB11629 |  | 1 | 0.04858633  | 0.9580599  |
| 299 | DB04817 |  | 1 | 0.048616223 | 0.9578110  |
| 300 | DB09274 |  | 1 | 0.048994474 | 0.9575621  |
| 301 | DB11171 |  | 1 | 0.049355686 | 0.9573132  |
| 302 | DB06119 |  | 1 | 0.05084625  | 0.9570643  |
| 303 | DB12529 |  | 1 | 0.05090672  | 0.9568154  |
| 304 | DB01126 |  | 1 | 0.051196765 | 0.9565665  |
| 305 | DB12474 |  | 1 | 0.051221296 | 0.9563176  |
| 306 | DB14574 |  | 1 | 0.05171003  | 0.9560687  |
| 307 | DB12473 |  | 1 | 0.052683838 | 0.9558198  |
| 308 | DB09119 |  | 1 | 0.0530992   | 0.9555709  |
| 309 | DB12472 |  | 1 | 0.053229474 | 0.9553220  |
| 310 | DB14151 |  | 1 | 0.054186165 | 0.9550731  |
| 311 | DB09398 |  | 1 | 0.054770272 | 0.9548242  |
| 312 | DB00348 |  | 1 | 0.05485561  | 0.9545753  |
| 313 | DB14500 |  | 1 | 0.055202384 | 0.9543264  |
| 314 | DB14513 |  | 1 | 0.055828497 | 0.9540775  |
| 315 | DB11718 |  | 1 | 0.055846494 | 0.9538286  |
| 316 | DB00472 |  | 1 | 0.05632822  | 0.9535797  |
| 317 | DB11768 |  | 1 | 0.056985572 | 0.9533308  |
| 318 | DB15991 |  | 1 | 0.05752495  | 0.9530819  |
| 319 | DB11110 |  | 1 | 0.057748906 | 0.9528330  |
| 320 | DB09238 |  | 1 | 0.057941686 | 0.9525841  |
| 321 | DB00134 |  | 1 | 0.058658503 | 0.9523352  |
| 322 | DB00176 |  | 1 | 0.05867704  | 0.9520863  |
| 323 | DB00538 |  | 1 | 0.059111755 | 0.9518374  |
| 324 | DB06757 |  | 1 | 0.06055501  | 0.9515885  |
| 325 | DB00334 |  | 1 | 0.061077233 | 0.9513396  |
| 326 | DB05382 |  | 1 | 0.06146362  | 0.9510907  |
| 327 | DB01119 |  | 1 | 0.06195655  | 0.9508418  |
| 328 | DB00316 |  | 1 | 0.06215519  | 0.9505929  |
| 329 | DB14544 |  | 1 | 0.06383577  | 0.9503440  |
| 330 | DB15793 |  | 1 | 0.06594681  | 0.9500951  |
| 331 | DB00393 |  | 1 | 0.06706935  | 0.9498462  |
| 332 | DB11123 |  | 1 | 0.06773937  | 0.9495973  |
| 333 | DB06780 |  | 1 | 0.06842817  | 0.9493484  |
| 334 | DB00657 |  | 1 | 0.0706793   | 0.9491005  |
| 335 | DB11239 |  | 1 | 0.07092186  | 0.9488516  |
| 336 | DB13274 |  | 1 | 0.07162498  | 0.9486027  |
| 337 | DB14529 |  | 1 | 0.07430808  | 0.9483538  |
| 338 | DB01956 |  | 1 | 0.07608929  | 0.9481049  |
| 339 | DB12289 |  | 1 | 0.07752274  | 0.9478560  |
| 340 | DB12965 |  | 1 | 0.07908643  | 0.9476071  |
| 341 | DB05246 |  | 1 | 0.08078131  | 0.9473582  |
| 342 | DB06441 |  | 1 | 0.0821713   | 0.9471093  |
| 343 | DB12015 |  | 1 | 0.08283396  | 0.9468604  |
| 344 | DB00317 |  | 1 | 0.08380666  | 0.9466115  |
| 345 | DB09333 |  | 1 | 0.08510142  | 0.9463626  |
| 346 | DB09536 |  | 1 | 0.08547726  | 0.9461137  |
| 347 | DB00411 |  | 1 | 0.08593485  | 0.9458648  |
| 348 | DB11127 |  | 1 | 0.087165475 | 0.9456159  |
| 349 | DB00468 |  | 1 | 0.088201396 | 0.9453670  |
| 350 | DB00007 |  | 1 | 0.08924972  | 0.9451181  |

|     |         |  |   |             |            |
|-----|---------|--|---|-------------|------------|
| 351 | DE00403 |  | 1 | 0,08968795  | 0,910312   |
| 352 | DE00927 |  | 1 | 0,093196705 | 0,9068033  |
| 353 | DE11132 |  | 1 | 0,09340979  | 0,90659016 |
| 354 | DE01598 |  | 1 | 0,09488381  | 0,9053162  |
| 355 | DE06854 |  | 1 | 0,0951292   | 0,9048788  |
| 356 | DE01063 |  | 1 | 0,09604116  | 0,90365886 |
| 357 | DE00740 |  | 1 | 0,09689527  | 0,90310466 |
| 358 | DE00894 |  | 1 | 0,09727607  | 0,9027239  |
| 359 | DE00820 |  | 1 | 0,0985447   | 0,90145534 |
| 360 | DE01019 |  | 1 | 0,09862726  | 0,90137273 |
| 361 | DE00201 |  | 1 | 0,09980315  | 0,9001969  |
| 362 | DE01348 |  | 1 | 0,10004079  | 0,8999592  |
| 363 | DE02893 |  | 1 | 0,100054085 | 0,8999459  |
| 364 | DE00050 |  | 1 | 0,10111156  | 0,8988884  |
| 365 | DE01015 |  | 1 | 0,10269955  | 0,8973905  |
| 366 | DE00981 |  | 1 | 0,10387784  | 0,8961224  |
| 367 | DE14178 |  | 1 | 0,10393925  | 0,89606075 |
| 368 | DE06767 |  | 1 | 0,10457114  | 0,8954289  |
| 369 | DE00344 |  | 1 | 0,1064218   | 0,8935782  |
| 370 | DE09330 |  | 1 | 0,10708607  | 0,8929139  |
| 371 | DE00277 |  | 1 | 0,10860106  | 0,89139897 |
| 372 | DE01224 |  | 1 | 0,10876391  | 0,89123607 |
| 373 | DE01632 |  | 1 | 0,1110789   | 0,8889211  |
| 374 | DE01377 |  | 1 | 0,11177114  | 0,88822883 |
| 375 | DE14550 |  | 1 | 0,1128135   | 0,8876387  |
| 376 | DE00855 |  | 1 | 0,11296818  | 0,88703185 |
| 377 | DE00336 |  | 1 | 0,11306536  | 0,8869346  |
| 378 | DE13117 |  | 1 | 0,114156865 | 0,88584316 |
| 379 | DE13972 |  | 1 | 0,1146612   | 0,8853388  |
| 380 | DE00569 |  | 1 | 0,11486839  | 0,8851316  |
| 381 | DE00772 |  | 1 | 0,11543053  | 0,8845695  |
| 382 | DE00847 |  | 1 | 0,11588346  | 0,88411653 |
| 383 | DE01059 |  | 1 | 0,11724236  | 0,88275576 |
| 384 | DE00898 |  | 1 | 0,11844468  | 0,8815553  |
| 385 | DE13157 |  | 1 | 0,11888039  | 0,88111967 |
| 386 | DE14838 |  | 1 | 0,12177654  | 0,8782235  |
| 387 | DE02638 |  | 1 | 0,12249476  | 0,87750524 |
| 388 | DE01151 |  | 1 | 0,12298918  | 0,87701076 |
| 389 | DE08916 |  | 1 | 0,12464153  | 0,8753585  |
| 390 | DE13997 |  | 1 | 0,12522767  | 0,8747723  |
| 391 | DE01495 |  | 1 | 0,12535846  | 0,87464154 |
| 392 | DE00581 |  | 1 | 0,12566367  | 0,8743363  |
| 393 | DE00903 |  | 1 | 0,12688895  | 0,873111   |
| 394 | DE00449 |  | 1 | 0,12744646  | 0,8725536  |
| 395 | DE00406 |  | 1 | 0,12856765  | 0,8704323  |
| 396 | DE00746 |  | 1 | 0,12961046  | 0,8703895  |
| 397 | DE00597 |  | 1 | 0,13133219  | 0,86866784 |
| 398 | DE00720 |  | 1 | 0,13381754  | 0,86618245 |
| 399 | DE01023 |  | 1 | 0,13693891  | 0,863061   |
| 400 | DE08918 |  | 1 | 0,14068888  | 0,8593111  |
| 401 | DE00703 |  | 1 | 0,14150625  | 0,8584937  |
| 402 | DE11387 |  | 1 | 0,14172092  | 0,8582791  |
| 403 | DE11705 |  | 1 | 0,14178379  | 0,8582162  |
| 404 | DE08824 |  | 1 | 0,14363076  | 0,8563792  |
| 405 | DE09161 |  | 1 | 0,14527784  | 0,85472214 |
| 406 | DE00230 |  | 1 | 0,14664085  | 0,8533591  |
| 407 | DE09097 |  | 1 | 0,1503277   | 0,84967226 |
| 408 | DE12754 |  | 1 | 0,15098664  | 0,8490134  |
| 409 | DE11761 |  | 1 | 0,15345001  | 0,84655    |
| 410 | DE06792 |  | 1 | 0,15463395  | 0,84536606 |
| 411 | DE11255 |  | 1 | 0,15494628  | 0,8450537  |
| 412 | DE00508 |  | 1 | 0,1550817   | 0,84491825 |
| 413 | DE00922 |  | 1 | 0,15550207  | 0,8444979  |
| 414 | DE11343 |  | 1 | 0,15673794  | 0,843382   |
| 415 | DE00891 |  | 1 | 0,15744025  | 0,8425588  |
| 416 | DE00655 |  | 1 | 0,15808101  | 0,841919   |
| 417 | DE09326 |  | 1 | 0,15917775  | 0,8408223  |
| 418 | DE01143 |  | 1 | 0,15935008  | 0,84064984 |
| 419 | DE08967 |  | 1 | 0,16131435  | 0,8386857  |
| 420 | DE00352 |  | 1 | 0,16191411  | 0,8380859  |
| 421 | DE11570 |  | 1 | 0,16239126  | 0,83760875 |
| 422 | DE06827 |  | 1 | 0,16443364  | 0,83556634 |
| 423 | DE00753 |  | 1 | 0,16543496  | 0,83455304 |
| 424 | DE11496 |  | 1 | 0,1661028   | 0,8330887  |
| 425 | DE01050 |  | 1 | 0,16740642  | 0,83239356 |
| 426 | DE06890 |  | 1 | 0,16913939  | 0,8308606  |
| 427 | DE01146 |  | 1 | 0,1696033   | 0,8303967  |
| 428 | DE01159 |  | 1 | 0,16970418  | 0,8302958  |
| 429 | DE00610 |  | 1 | 0,1702324   | 0,8297675  |
| 430 | DE04918 |  | 1 | 0,1745067   | 0,8245493  |
| 431 | DE00863 |  | 1 | 0,17550611  | 0,8244938  |
| 432 | DE01087 |  | 1 | 0,17624351  | 0,82375646 |
| 433 | DE00355 |  | 1 | 0,17667466  | 0,82323534 |
| 434 | DE00559 |  | 1 | 0,17748179  | 0,82251817 |
| 435 | DE00394 |  | 1 | 0,17820165  | 0,8217984  |
| 436 | DE14600 |  | 1 | 0,17886542  | 0,82113457 |
| 437 | DE06715 |  | 1 | 0,17929927  | 0,82070076 |
| 438 | DE11093 |  | 1 | 0,18056078  | 0,8194392  |
| 439 | DE01608 |  | 1 | 0,1833544   | 0,81664556 |
| 440 | DE13269 |  | 1 | 0,18730798  | 0,8126919  |
| 441 | DE01185 |  | 1 | 0,18970153  | 0,8102985  |
| 442 | DE01424 |  | 1 | 0,18991359  | 0,8100864  |
| 443 | DE13288 |  | 1 | 0,19070475  | 0,8092953  |
| 444 | DE08871 |  | 1 | 0,19197592  | 0,8080824  |
| 445 | DE05154 |  | 1 | 0,194631    | 0,80536896 |
| 446 | DE14643 |  | 1 | 0,19822684  | 0,8017732  |
| 447 | DE05812 |  | 1 | 0,20365094  | 0,79634905 |
| 448 | DE14507 |  | 1 | 0,20366059  | 0,7963394  |
| 449 | DE01427 |  | 1 | 0,20390709  | 0,7960929  |
| 450 | DE06824 |  | 1 | 0,20443562  | 0,79556435 |
| 451 | DE14006 |  | 1 | 0,20519197  | 0,79480803 |
| 452 | DE09213 |  | 1 | 0,20716095  | 0,79283905 |
| 453 | DE13228 |  | 1 | 0,20830351  | 0,7916964  |
| 454 | DE08944 |  | 1 | 0,21034029  | 0,78965974 |
| 455 | DE00305 |  | 1 | 0,21054626  | 0,7894537  |
| 456 | DE09140 |  | 1 | 0,21089607  | 0,7891039  |
| 457 | DE00641 |  | 1 | 0,21135195  | 0,78864807 |
| 458 | DE13209 |  | 1 | 0,21259984  | 0,7874002  |
| 459 | DE14644 |  | 1 | 0,21516283  | 0,7848372  |
| 460 | DE12492 |  | 1 | 0,21649761  | 0,78350234 |
| 461 | DE06616 |  | 1 | 0,21859027  | 0,7814097  |
| 462 | DE00934 |  | 1 | 0,21934219  | 0,78065777 |
| 463 | DE01827 |  | 1 | 0,21966818  | 0,78033617 |
| 464 | DE11092 |  | 1 | 0,21980605  | 0,780184   |
| 465 | DE09157 |  | 1 | 0,21990341  | 0,7800966  |
| 466 | DE13813 |  | 1 | 0,22028723  | 0,77971274 |
| 467 | DE09009 |  | 1 | 0,22169268  | 0,7783073  |
| 468 | DE00684 |  | 1 | 0,22387226  | 0,7761278  |
| 469 | DE09087 |  | 1 | 0,22587684  | 0,7741232  |
| 470 | DE07565 |  | 1 | 0,2261167   | 0,7738833  |
| 471 | DE14650 |  | 1 | 0,2274568   | 0,77225435 |
| 472 | DE00115 |  | 1 | 0,22823331  | 0,7717667  |
| 473 | DE11116 |  | 1 | 0,23075838  | 0,7692416  |
| 474 | DE04880 |  | 1 | 0,23245142  | 0,7674866  |
| 475 | DE00458 |  | 1 | 0,23655972  | 0,76344025 |
| 476 | DE13743 |  | 1 | 0,23684716  | 0,76315284 |
| 477 | DE00200 |  | 1 | 0,23775947  | 0,7622405  |
| 478 | DE09376 |  | 1 | 0,23853219  | 0,7614678  |
| 479 | DE06716 |  | 1 | 0,23889932  | 0,76110065 |
| 480 | DE11257 |  | 1 | 0,24032047  | 0,75967956 |
| 481 | DE12107 |  | 1 | 0,24214092  | 0,75785905 |
| 482 | DE01410 |  | 1 | 0,24846403  | 0,751536   |
| 483 | DE03884 |  | 1 | 0,2508688   | 0,74915314 |
| 484 | DE09129 |  | 1 | 0,25155035  | 0,74844956 |
| 485 | DE01914 |  | 1 | 0,25369105  | 0,7463089  |

|     |         |  |   |            |            |
|-----|---------|--|---|------------|------------|
| 486 | DE08139 |  | 1 | 0.25556314 | 0.74443686 |
| 487 | DE00350 |  | 1 | 0.25582382 | 0.74417615 |
| 488 | DE12243 |  | 1 | 0.2575863  | 0.7424137  |
| 489 | DE00475 |  | 1 | 0.25855596 | 0.74104404 |
| 490 | DE14505 |  | 1 | 0.25932753 | 0.7406725  |
| 491 | DE00810 |  | 1 | 0.26082495 | 0.7391751  |
| 492 | DE06742 |  | 1 | 0.2645541  | 0.7354459  |
| 493 | DE00950 |  | 1 | 0.26558617 | 0.7344138  |
| 494 | DE00544 |  | 1 | 0.26692888 | 0.73307115 |
| 495 | DE00488 |  | 1 | 0.26767904 | 0.73232096 |
| 496 | DE13853 |  | 1 | 0.26876903 | 0.7312309  |
| 497 | DE09370 |  | 1 | 0.2695565  | 0.73044354 |
| 498 | DE01242 |  | 1 | 0.26996088 | 0.7300391  |
| 499 | DE11512 |  | 1 | 0.27184722 | 0.72815275 |
| 500 | DE09394 |  | 1 | 0.27242875 | 0.7275712  |
| 501 | DE11151 |  | 1 | 0.27345865 | 0.7283944  |
| 502 | DE06717 |  | 1 | 0.2765504  | 0.7234496  |
| 503 | DE01362 |  | 1 | 0.27940512 | 0.7205949  |
| 504 | DE09275 |  | 1 | 0.28296518 | 0.7170349  |
| 505 | DE09078 |  | 1 | 0.28374717 | 0.71625286 |
| 506 | DE02659 |  | 1 | 0.2845815  | 0.71541846 |
| 507 | DE00822 |  | 1 | 0.28540263 | 0.71459734 |
| 508 | DE01058 |  | 1 | 0.28917706 | 0.71082294 |
| 509 | DE01082 |  | 1 | 0.29050645 | 0.7094936  |
| 510 | DE00853 |  | 1 | 0.29173172 | 0.7082983  |
| 511 | DE06809 |  | 1 | 0.29438177 | 0.7056383  |
| 512 | DE09419 |  | 1 | 0.29906458 | 0.7003554  |
| 513 | DE00716 |  | 1 | 0.30221814 | 0.69778186 |
| 514 | DE11952 |  | 1 | 0.30376458 | 0.6962354  |
| 515 | DE09481 |  | 1 | 0.30456474 | 0.6954353  |
| 516 | DE09151 |  | 1 | 0.3048251  | 0.69517493 |
| 517 | DE13265 |  | 1 | 0.30524036 | 0.6947596  |
| 518 | DE01202 |  | 1 | 0.308114   | 0.69188595 |
| 519 | DE14502 |  | 1 | 0.30886337 | 0.69113656 |
| 520 | DE03745 |  | 1 | 0.30919796 | 0.69080204 |
| 521 | DE04864 |  | 1 | 0.30924627 | 0.6907538  |
| 522 | DE11153 |  | 1 | 0.31101066 | 0.6889893  |
| 523 | DE00425 |  | 1 | 0.31126404 | 0.68873596 |
| 524 | DE00968 |  | 1 | 0.3113786  | 0.6886214  |
| 525 | DE09084 |  | 1 | 0.31328738 | 0.6867126  |
| 526 | DE01043 |  | 1 | 0.31365263 | 0.6863474  |
| 527 | DE06736 |  | 1 | 0.31461993 | 0.6853801  |
| 528 | DE01613 |  | 1 | 0.3180271  | 0.6819729  |
| 529 | DE01435 |  | 1 | 0.31815842 | 0.68184155 |
| 530 | DE00738 |  | 1 | 0.31830603 | 0.681694   |
| 531 | DE13381 |  | 1 | 0.3194374  | 0.6805626  |
| 532 | DE14509 |  | 1 | 0.32179555 | 0.6782044  |
| 533 | DE09110 |  | 1 | 0.32400107 | 0.6759989  |
| 534 | DE15480 |  | 1 | 0.3304119  | 0.6695881  |
| 535 | DE11742 |  | 1 | 0.33215854 | 0.66784143 |
| 536 | DE00869 |  | 1 | 0.33392504 | 0.66607493 |
| 537 | DE00186 |  | 1 | 0.33431423 | 0.66568583 |
| 538 | DE14598 |  | 1 | 0.3370663  | 0.6629337  |
| 539 | DE01153 |  | 1 | 0.33814207 | 0.6618579  |
| 540 | DE06589 |  | 1 | 0.3400604  | 0.6599396  |
| 541 | DE00492 |  | 1 | 0.34039316 | 0.6596068  |
| 542 | DE01239 |  | 1 | 0.3424196  | 0.6575804  |
| 543 | DE06804 |  | 1 | 0.34663165 | 0.65336835 |
| 544 | DE08889 |  | 1 | 0.34691757 | 0.6530825  |
| 545 | DE00529 |  | 1 | 0.34931237 | 0.65068763 |
| 546 | DE00293 |  | 1 | 0.35355738 | 0.64644265 |
| 547 | DE00518 |  | 1 | 0.3557245  | 0.6442754  |
| 548 | DE04896 |  | 1 | 0.35674143 | 0.6432586  |
| 549 | DE00191 |  | 1 | 0.35853292 | 0.64146715 |
| 550 | DE08881 |  | 1 | 0.3600071  | 0.6399629  |
| 551 | DE00297 |  | 1 | 0.36106525 | 0.63890475 |
| 552 | DE02789 |  | 1 | 0.36216652 | 0.6378334  |
| 553 | DE13858 |  | 1 | 0.36700332 | 0.6329967  |
| 554 | DE13967 |  | 1 | 0.36776522 | 0.6322348  |
| 555 | DE09038 |  | 1 | 0.37084603 | 0.62915397 |
| 556 | DE00804 |  | 1 | 0.37101454 | 0.62898546 |
| 557 | DE14501 |  | 1 | 0.37127    | 0.62872994 |
| 558 | DE01132 |  | 1 | 0.37153423 | 0.6284657  |
| 559 | DE06402 |  | 1 | 0.37267196 | 0.62732804 |
| 560 | DE00270 |  | 1 | 0.37592083 | 0.6243974  |
| 561 | DE11610 |  | 1 | 0.3785193  | 0.62148064 |
| 562 | DE01627 |  | 1 | 0.3790843  | 0.6209157  |
| 563 | DE01291 |  | 1 | 0.3816217  | 0.61837834 |
| 564 | DE00550 |  | 1 | 0.38241294 | 0.61758703 |
| 565 | DE12834 |  | 1 | 0.3913328  | 0.60866725 |
| 566 | DE00916 |  | 1 | 0.39308652 | 0.60691345 |
| 567 | DE13155 |  | 1 | 0.39478415 | 0.6052159  |
| 568 | DE01002 |  | 1 | 0.39498183 | 0.6050182  |
| 569 | DE01093 |  | 1 | 0.3971848  | 0.6028152  |
| 570 | DE06193 |  | 1 | 0.39847857 | 0.60152143 |
| 571 | DE00801 |  | 1 | 0.40285298 | 0.59714735 |
| 572 | DE00770 |  | 1 | 0.40303877 | 0.59696126 |
| 573 | DE06150 |  | 1 | 0.40512526 | 0.59487474 |
| 574 | DE06724 |  | 1 | 0.41035238 | 0.58964765 |
| 575 | DE09299 |  | 1 | 0.41159093 | 0.58840907 |
| 576 | DE00601 |  | 1 | 0.4130853  | 0.5869147  |
| 577 | DE11090 |  | 1 | 0.41440025 | 0.5855997  |
| 578 | DE00647 |  | 1 | 0.41470847 | 0.58529156 |
| 579 | DE00651 |  | 1 | 0.41612375 | 0.58387625 |
| 580 | DE13911 |  | 1 | 0.41679978 | 0.58320016 |
| 581 | DE01036 |  | 1 | 0.4172059  | 0.582794   |
| 582 | DE00512 |  | 1 | 0.4177874  | 0.58221257 |
| 583 | DE00700 |  | 1 | 0.41806316 | 0.5819368  |
| 584 | DE00354 |  | 1 | 0.42493558 | 0.5750644  |
| 585 | DE09068 |  | 1 | 0.4288276  | 0.5711724  |
| 586 | DE03585 |  | 1 | 0.4288688  | 0.57113117 |
| 587 | DE14082 |  | 1 | 0.4312752  | 0.56872475 |
| 588 | DE14499 |  | 1 | 0.43203    | 0.567967   |
| 589 | DE11585 |  | 1 | 0.4334255  | 0.5675745  |
| 590 | DE01104 |  | 1 | 0.43638996 | 0.56341004 |
| 591 | DE00199 |  | 1 | 0.43682477 | 0.5631752  |
| 592 | DE13322 |  | 1 | 0.4368338  | 0.56316626 |
| 593 | DE11180 |  | 1 | 0.4374541  | 0.56254584 |
| 594 | DE00296 |  | 1 | 0.441671   | 0.558329   |
| 595 | DE11160 |  | 1 | 0.44772208 | 0.55227786 |
| 596 | DE00359 |  | 1 | 0.4487844  | 0.5512156  |
| 597 | DE11098 |  | 1 | 0.45167878 | 0.54832125 |
| 598 | DE01419 |  | 1 | 0.45202628 | 0.5477918  |
| 599 | DE09112 |  | 1 | 0.45292993 | 0.547371   |
| 600 | DE01230 |  | 1 | 0.45590543 | 0.54409057 |
| 601 | DE11200 |  | 1 | 0.45592391 | 0.5440761  |
| 602 | DE09314 |  | 1 | 0.45671326 | 0.54328674 |
| 603 | DE01586 |  | 1 | 0.45862845 | 0.5413715  |
| 604 | DE11205 |  | 1 | 0.4594017  | 0.54059833 |
| 605 | DE00838 |  | 1 | 0.46103993 | 0.53896004 |
| 606 | DE00961 |  | 1 | 0.4617493  | 0.53825074 |
| 607 | DE14106 |  | 1 | 0.4641084  | 0.53589153 |
| 608 | DE13783 |  | 1 | 0.4671538  | 0.5328462  |
| 609 | DE14150 |  | 1 | 0.46820801 | 0.53179204 |
| 610 | DE12434 |  | 1 | 0.47083098 | 0.52916896 |
| 611 | DE01033 |  | 1 | 0.47301292 | 0.526987   |
| 612 | DE01096 |  | 1 | 0.47386265 | 0.5261373  |
| 613 | DE09377 |  | 1 | 0.48580262 | 0.51419735 |
| 614 | DE06810 |  | 1 | 0.4890673  | 0.51093274 |
| 615 | DE01620 |  | 1 | 0.4898174  | 0.5101826  |
| 616 | DE01097 |  | 1 | 0.4898418  | 0.5101583  |
| 617 | DE09411 |  | 1 | 0.4923958  | 0.5076042  |
| 618 | DE14015 |  | 1 | 0.4957885  | 0.5042114  |
| 619 | DE00282 |  | 0 | 0.5016167  | 0.49838322 |
| 620 | DE06413 |  | 0 | 0.5018592  | 0.4981409  |

|     |         |   |            |            |
|-----|---------|---|------------|------------|
| 621 | DR09138 | 0 | 0.5112567  | 0.48874334 |
| 622 | DR00283 | 0 | 0.5120778  | 0.48792213 |
| 623 | DR00648 | 0 | 0.5174921  | 0.48250785 |
| 624 | DR06707 | 0 | 0.51796305 | 0.48203704 |
| 625 | DR09499 | 0 | 0.5192791  | 0.48072897 |
| 626 | DR00727 | 0 | 0.5221191  | 0.47788084 |
| 627 | DR01057 | 0 | 0.52249813 | 0.47750193 |
| 628 | DR09460 | 0 | 0.52225124 | 0.4767487  |
| 629 | DR06414 | 0 | 0.5257211  | 0.4742789  |
| 630 | DR09153 | 0 | 0.5272828  | 0.47271717 |
| 631 | DR14517 | 0 | 0.5299274  | 0.4700726  |
| 632 | DR00467 | 0 | 0.53147644 | 0.46852356 |
| 633 | DR11285 | 0 | 0.53275824 | 0.46724176 |
| 634 | DR01624 | 0 | 0.53368706 | 0.46631297 |
| 635 | DR06614 | 0 | 0.53442955 | 0.46557042 |
| 636 | DR00344 | 0 | 0.53763187 | 0.4623881  |
| 637 | DR09484 | 0 | 0.5425105  | 0.45748952 |
| 638 | DR00970 | 0 | 0.5429868  | 0.4570131  |
| 639 | DR00363 | 0 | 0.5459544  | 0.45404556 |
| 640 | DR01077 | 0 | 0.5461033  | 0.45389667 |
| 641 | DR06797 | 0 | 0.54619735 | 0.45380268 |
| 642 | DR01330 | 0 | 0.5475527  | 0.45244727 |
| 643 | DR11573 | 0 | 0.5478414  | 0.45215854 |
| 644 | DR09019 | 0 | 0.55027896 | 0.449721   |
| 645 | DR00919 | 0 | 0.5507725  | 0.44922754 |
| 646 | DR00183 | 0 | 0.552311   | 0.4437889  |
| 647 | DR06799 | 0 | 0.56335604 | 0.43664393 |
| 648 | DR06636 | 0 | 0.56365114 | 0.4363489  |
| 649 | DR14141 | 0 | 0.56945246 | 0.4305475  |
| 650 | DR00665 | 0 | 0.57096934 | 0.42903066 |
| 651 | DR09095 | 0 | 0.5717265  | 0.42827347 |
| 652 | DR11080 | 0 | 0.57355434 | 0.42644572 |
| 653 | DR00980 | 0 | 0.5773275  | 0.42267248 |
| 654 | DR00908 | 0 | 0.57954    | 0.42045996 |
| 655 | DR09156 | 0 | 0.5828278  | 0.4171722  |
| 656 | DR01164 | 0 | 0.5852356  | 0.41476437 |
| 657 | DR00712 | 0 | 0.5852378  | 0.41476217 |
| 658 | DR01338 | 0 | 0.5860243  | 0.41397575 |
| 659 | DR00532 | 0 | 0.58630687 | 0.41369313 |
| 660 | DR06781 | 0 | 0.58813375 | 0.41186625 |
| 661 | DR00273 | 0 | 0.59179914 | 0.40820095 |
| 662 | DR09494 | 0 | 0.592758   | 0.40724197 |
| 663 | DR11575 | 0 | 0.5934852  | 0.40651476 |
| 664 | DR09407 | 0 | 0.59623367 | 0.40376927 |
| 665 | DR06706 | 0 | 0.59713274 | 0.40286726 |
| 666 | DR09060 | 0 | 0.5993722  | 0.4004279  |
| 667 | DR00166 | 0 | 0.6001838  | 0.39981624 |
| 668 | DR14078 | 0 | 0.6027165  | 0.39728352 |
| 669 | DR12377 | 0 | 0.6063518  | 0.39364824 |
| 670 | DR01074 | 0 | 0.60686195 | 0.39313802 |
| 671 | DR01101 | 0 | 0.6070935  | 0.3929065  |
| 672 | DR00607 | 0 | 0.60986644 | 0.3901336  |
| 673 | DR00814 | 0 | 0.61262435 | 0.38737565 |
| 674 | DR00371 | 0 | 0.6128099  | 0.38719013 |
| 675 | DR00427 | 0 | 0.613302   | 0.386698   |
| 676 | DR12952 | 0 | 0.61532235 | 0.3846777  |
| 677 | DR01237 | 0 | 0.61578834 | 0.38421166 |
| 678 | DR00205 | 0 | 0.6158222  | 0.38417783 |
| 679 | DR14116 | 0 | 0.6168083  | 0.38319173 |
| 680 | DR00480 | 0 | 0.6172405  | 0.38275948 |
| 681 | DR00148 | 0 | 0.6195783  | 0.38042173 |
| 682 | DR09498 | 0 | 0.6199944  | 0.3800056  |
| 683 | DR04843 | 0 | 0.6199967  | 0.3800032  |
| 684 | DR01046 | 0 | 0.62006265 | 0.37969335 |
| 685 | DR11153 | 0 | 0.6203899  | 0.37941945 |
| 686 | DR15925 | 0 | 0.62075424 | 0.37924576 |
| 687 | DR14206 | 0 | 0.622397   | 0.377603   |
| 688 | DR00380 | 0 | 0.6255893  | 0.37441066 |
| 689 | DR09123 | 0 | 0.6262866  | 0.37371346 |
| 690 | DR14159 | 0 | 0.6265931  | 0.37340686 |
| 691 | DR09477 | 0 | 0.6276042  | 0.37239578 |
| 692 | DR13954 | 0 | 0.62826264 | 0.37173736 |
| 693 | DR01189 | 0 | 0.6372349  | 0.362765   |
| 694 | DR01390 | 0 | 0.638385   | 0.36141506 |
| 695 | DR00830 | 0 | 0.63906395 | 0.35939392 |
| 696 | DR01215 | 0 | 0.6432537  | 0.35674632 |
| 697 | DR09237 | 0 | 0.64421797 | 0.3557821  |
| 698 | DR00487 | 0 | 0.64581066 | 0.35418934 |
| 699 | DR09351 | 0 | 0.64916384 | 0.35083616 |
| 700 | DR05389 | 0 | 0.6497853  | 0.3502147  |
| 701 | DR00778 | 0 | 0.6498209  | 0.35017905 |
| 702 | DR01197 | 0 | 0.6515479  | 0.34845212 |
| 703 | DR04160 | 0 | 0.6522276  | 0.34777242 |
| 704 | DR04837 | 0 | 0.6560936  | 0.34390637 |
| 705 | DR00857 | 0 | 0.66038075 | 0.33941928 |
| 706 | DR00653 | 0 | 0.66457856 | 0.33542144 |
| 707 | DR00187 | 0 | 0.66803896 | 0.33196107 |
| 708 | DR08938 | 0 | 0.67363465 | 0.32636532 |
| 709 | DR14533 | 0 | 0.678527   | 0.32147303 |
| 710 | DR09069 | 0 | 0.6787965  | 0.32120347 |
| 711 | DR00612 | 0 | 0.6801655  | 0.3198345  |
| 712 | DR00495 | 0 | 0.6810329  | 0.318967   |
| 713 | DR14545 | 0 | 0.6815372  | 0.31846285 |
| 714 | DR00227 | 0 | 0.6817883  | 0.31823167 |
| 715 | DR14674 | 0 | 0.68294877 | 0.3170512  |
| 716 | DR09501 | 0 | 0.6841785  | 0.31582153 |
| 717 | DR06282 | 0 | 0.68491143 | 0.31508863 |
| 718 | DR00680 | 0 | 0.68574804 | 0.314252   |
| 719 | DR01190 | 0 | 0.6877443  | 0.31225565 |
| 720 | DR11056 | 0 | 0.6893807  | 0.31061932 |
| 721 | DR08801 | 0 | 0.69162476 | 0.30837527 |
| 722 | DR00924 | 0 | 0.6921851  | 0.30781487 |
| 723 | DR11820 | 0 | 0.69502616 | 0.3049738  |
| 724 | DR00882 | 0 | 0.69818884 | 0.30181116 |
| 725 | DR00381 | 0 | 0.7026917  | 0.2973083  |
| 726 | DR00711 | 0 | 0.7033085  | 0.29669157 |
| 727 | DR00854 | 0 | 0.70470244 | 0.2952976  |
| 728 | DR13749 | 0 | 0.7065993  | 0.29340073 |
| 729 | DR00763 | 0 | 0.7093429  | 0.29065713 |
| 730 | DR00692 | 0 | 0.7118596  | 0.28814045 |
| 731 | DR00418 | 0 | 0.7126085  | 0.2873915  |
| 732 | DR03615 | 0 | 0.7152573  | 0.28474274 |
| 733 | DR01574 | 0 | 0.71525767 | 0.28424623 |
| 734 | DR00599 | 0 | 0.71592337 | 0.2840766  |
| 735 | DR09281 | 0 | 0.7197252  | 0.28027484 |
| 736 | DR00555 | 0 | 0.7215899  | 0.27841005 |
| 737 | DR14018 | 0 | 0.7217215  | 0.27827856 |
| 738 | DR13249 | 0 | 0.7241632  | 0.2758368  |
| 739 | DR15477 | 0 | 0.7267362  | 0.27326384 |
| 740 | DR00632 | 0 | 0.7270894  | 0.27291054 |
| 741 | DR13953 | 0 | 0.7310123  | 0.26888772 |
| 742 | DR00775 | 0 | 0.7313302  | 0.26866975 |
| 743 | DR09139 | 0 | 0.7315721  | 0.26842785 |
| 744 | DR03754 | 0 | 0.7334751  | 0.26552494 |
| 745 | DR00123 | 0 | 0.73702973 | 0.26297024 |
| 746 | DR14518 | 0 | 0.7384458  | 0.26155415 |
| 747 | DR11079 | 0 | 0.73961407 | 0.260386   |
| 748 | DR00743 | 0 | 0.7422486  | 0.25775138 |
| 749 | DR00326 | 0 | 0.74341786 | 0.25658217 |
| 750 | DR00292 | 0 | 0.7456545  | 0.25434548 |
| 751 | DR09490 | 0 | 0.74586314 | 0.25413683 |
| 752 | DR11180 | 0 | 0.74607086 | 0.25392914 |
| 753 | DR02640 | 0 | 0.7502643  | 0.24973574 |
| 754 | DR00542 | 0 | 0.7523894  | 0.24761061 |
| 755 | DR13987 | 0 | 0.75328034 | 0.24671964 |

|     |         |   |            |             |
|-----|---------|---|------------|-------------|
| 756 | DB16022 | 0 | 0.75331956 | 0.24668047  |
| 757 | DB06213 | 0 | 0.7534983  | 0.24650167  |
| 758 | DB12407 | 0 | 0.7558503  | 0.24414967  |
| 759 | DB13977 | 0 | 0.7589388  | 0.24106118  |
| 760 | DB06756 | 0 | 0.7594655  | 0.24053448  |
| 761 | DB08813 | 0 | 0.76982475 | 0.23337528  |
| 762 | DB01353 | 0 | 0.7693077  | 0.23069234  |
| 763 | DB09205 | 0 | 0.7700651  | 0.2299349   |
| 764 | DB00478 | 0 | 0.7709035  | 0.22909667  |
| 765 | DB00829 | 0 | 0.7735637  | 0.22843633  |
| 766 | DB01366 | 0 | 0.7744713  | 0.2255287   |
| 767 | DB11159 | 0 | 0.7758234  | 0.22417656  |
| 768 | DB06795 | 0 | 0.776182   | 0.22381802  |
| 769 | DB01246 | 0 | 0.7779372  | 0.22206283  |
| 770 | DB12978 | 0 | 0.7787387  | 0.22120909  |
| 771 | DB03921 | 0 | 0.7800099  | 0.21999316  |
| 772 | DB14189 | 0 | 0.78071356 | 0.21928647  |
| 773 | DB09313 | 0 | 0.78737175 | 0.21262828  |
| 774 | DB01298 | 0 | 0.78764075 | 0.21235923  |
| 775 | DB11963 | 0 | 0.7878079  | 0.2121922   |
| 776 | DB00400 | 0 | 0.7879196  | 0.21208045  |
| 777 | DB11915 | 0 | 0.78847414 | 0.21152587  |
| 778 | DB00773 | 0 | 0.791583   | 0.20841694  |
| 779 | DB08883 | 0 | 0.7925725  | 0.20732747  |
| 780 | DB00236 | 0 | 0.7939732  | 0.20620676  |
| 781 | DB00401 | 0 | 0.80107427 | 0.1989257   |
| 782 | DB01987 | 0 | 0.8017195  | 0.19828051  |
| 783 | DB00501 | 0 | 0.80273515 | 0.19726487  |
| 784 | DB13267 | 0 | 0.802749   | 0.19725107  |
| 785 | DB01152 | 0 | 0.8051231  | 0.19487697  |
| 786 | DB00504 | 0 | 0.8058402  | 0.19415978  |
| 787 | DB09563 | 0 | 0.8077686  | 0.1922314   |
| 788 | DB00370 | 0 | 0.8083038  | 0.19169627  |
| 789 | DB01589 | 0 | 0.80831087 | 0.19168915  |
| 790 | DB00195 | 0 | 0.80846363 | 0.19153641  |
| 791 | DB12010 | 0 | 0.8103077  | 0.1896624   |
| 792 | DB12941 | 0 | 0.81331855 | 0.18668142  |
| 793 | DB00929 | 0 | 0.81366366 | 0.1863363   |
| 794 | DB09472 | 0 | 0.8149001  | 0.18509986  |
| 795 | DB00540 | 0 | 0.8150778  | 0.18492217  |
| 796 | DB00404 | 0 | 0.8151884  | 0.18481158  |
| 797 | DB00252 | 0 | 0.8162111  | 0.18378885  |
| 798 | DB09277 | 0 | 0.8175783  | 0.18242164  |
| 799 | DB09488 | 0 | 0.8196343  | 0.1803667   |
| 800 | DB11081 | 0 | 0.8208262  | 0.17917386  |
| 801 | DB00219 | 0 | 0.8221468  | 0.17785321  |
| 802 | DB00274 | 0 | 0.8239859  | 0.17631409  |
| 803 | DB00974 | 0 | 0.82721573 | 0.17278425  |
| 804 | DB00331 | 0 | 0.829791   | 0.17020893  |
| 805 | DB00392 | 0 | 0.8302921  | 0.16970792  |
| 806 | DB00211 | 0 | 0.8303983  | 0.16960174  |
| 807 | DB06705 | 0 | 0.8327768  | 0.16722324  |
| 808 | DB01218 | 0 | 0.8322316  | 0.16676883  |
| 809 | DB01091 | 0 | 0.835491   | 0.16450885  |
| 810 | DB01583 | 0 | 0.8355014  | 0.16443986  |
| 811 | DB11936 | 0 | 0.8385975  | 0.16140251  |
| 812 | DB00828 | 0 | 0.8385997  | 0.16140029  |
| 813 | DB13960 | 0 | 0.84139836 | 0.15860158  |
| 814 | DB08823 | 0 | 0.8419854  | 0.15801461  |
| 815 | DB04826 | 0 | 0.84277683 | 0.15722312  |
| 816 | DB01076 | 0 | 0.8430694  | 0.15693061  |
| 817 | DB00932 | 0 | 0.8438393  | 0.15616074  |
| 818 | DB09291 | 0 | 0.8451897  | 0.15481031  |
| 819 | DB09503 | 0 | 0.8453498  | 0.15465717  |
| 820 | DB04011 | 0 | 0.8457793  | 0.15422073  |
| 821 | DB04540 | 0 | 0.84630334 | 0.15369667  |
| 822 | DB01181 | 0 | 0.84680724 | 0.15319271  |
| 823 | DB06206 | 0 | 0.84802985 | 0.15197015  |
| 824 | DB05294 | 0 | 0.8484009  | 0.15159912  |
| 825 | DB11150 | 0 | 0.84876317 | 0.15123683  |
| 826 | DB00677 | 0 | 0.8498396  | 0.15016037  |
| 827 | DB00399 | 0 | 0.8510499  | 0.1489501   |
| 828 | DB01299 | 0 | 0.8510867  | 0.14891332  |
| 829 | DB00907 | 0 | 0.8516863  | 0.14831334  |
| 830 | DB01587 | 0 | 0.8523071  | 0.14799298  |
| 831 | DB00452 | 0 | 0.85255575 | 0.14744443  |
| 832 | DB14187 | 0 | 0.85343134 | 0.14656867  |
| 833 | DB08910 | 0 | 0.85414505 | 0.14585496  |
| 834 | DB00460 | 0 | 0.8554496  | 0.14455038  |
| 835 | DB01062 | 0 | 0.85996485 | 0.1400352   |
| 836 | DB00281 | 0 | 0.8609758  | 0.13902412  |
| 837 | DB01191 | 0 | 0.8612052  | 0.13879481  |
| 838 | DB00531 | 0 | 0.8619739  | 0.13802612  |
| 839 | DB14481 | 0 | 0.86214066 | 0.13785993  |
| 840 | DB13615 | 0 | 0.8624805  | 0.13751948  |
| 841 | DB09104 | 0 | 0.86274385 | 0.13725607  |
| 842 | DB00454 | 0 | 0.86310905 | 0.13689093  |
| 843 | DB13247 | 0 | 0.8661303  | 0.13386974  |
| 844 | DB00972 | 0 | 0.86707675 | 0.13292322  |
| 845 | DB00920 | 0 | 0.8680933  | 0.1319067   |
| 846 | DB11386 | 0 | 0.87090206 | 0.12909794  |
| 847 | DB00618 | 0 | 0.8713802  | 0.12861986  |
| 848 | DB09497 | 0 | 0.87290653 | 0.12699942  |
| 849 | DB05106 | 0 | 0.87659407 | 0.12340596  |
| 850 | DB04743 | 0 | 0.8773742  | 0.12282583  |
| 851 | DB00821 | 0 | 0.87745744 | 0.12254258  |
| 852 | DB09210 | 0 | 0.8781959  | 0.12180406  |
| 853 | DB09322 | 0 | 0.87854797 | 0.121451974 |
| 854 | DB11068 | 0 | 0.8787144  | 0.121285625 |
| 855 | DB09449 | 0 | 0.87892723 | 0.1210728   |
| 856 | DB00229 | 0 | 0.8808591  | 0.11914093  |
| 857 | DB00830 | 0 | 0.8811141  | 0.118885934 |
| 858 | DB00902 | 0 | 0.8815939  | 0.11840616  |
| 859 | DB02772 | 0 | 0.88266796 | 0.11733206  |
| 860 | DB00798 | 0 | 0.8827796  | 0.11722034  |
| 861 | DB06176 | 0 | 0.8839764  | 0.11602362  |
| 862 | DB06755 | 0 | 0.88412297 | 0.115877114 |
| 863 | DB00647 | 0 | 0.8864344  | 0.113565594 |
| 864 | DB09167 | 0 | 0.8876139  | 0.11238616  |
| 865 | DB01035 | 0 | 0.8900072  | 0.10999278  |
| 866 | DB08804 | 0 | 0.8901407  | 0.10985922  |
| 867 | DB11362 | 0 | 0.8901771  | 0.10982899  |
| 868 | DB13100 | 0 | 0.8904243  | 0.10952572  |
| 869 | DB00389 | 0 | 0.8914324  | 0.10856653  |
| 870 | DB03088 | 0 | 0.89185303 | 0.10814896  |
| 871 | DB00231 | 0 | 0.8920626  | 0.10793734  |
| 872 | DB00341 | 0 | 0.89390266 | 0.106097296 |
| 873 | DB01142 | 0 | 0.8955182  | 0.10448178  |
| 874 | DB16019 | 0 | 0.8978363  | 0.10216365  |
| 875 | DB00429 | 0 | 0.89800125 | 0.1019987   |
| 876 | DB00484 | 0 | 0.89920413 | 0.10079585  |
| 877 | DB08873 | 0 | 0.9000844  | 0.09991568  |
| 878 | DB00579 | 0 | 0.9001282  | 0.09987179  |
| 879 | DB05245 | 0 | 0.9002656  | 0.09973485  |
| 880 | DB05351 | 0 | 0.90099424 | 0.09900576  |
| 881 | DB00361 | 0 | 0.90114206 | 0.09885796  |
| 882 | DB06703 | 0 | 0.9011746  | 0.098825455 |
| 883 | DB00395 | 0 | 0.9026069  | 0.09739008  |
| 884 | DB00888 | 0 | 0.90271914 | 0.09728084  |
| 885 | DB09048 | 0 | 0.90364105 | 0.09635896  |
| 886 | DB06701 | 0 | 0.90452564 | 0.0954743   |
| 887 | DB08826 | 0 | 0.90519494 | 0.09480509  |
| 888 | DB01421 | 0 | 0.9054499  | 0.09455006  |
| 889 | DB00122 | 0 | 0.9054939  | 0.09450612  |
| 890 | DB00668 | 0 | 0.90608215 | 0.093917824 |

|      |         |   |            |             |
|------|---------|---|------------|-------------|
| 891  | DE09418 | 0 | 0.9071974  | 0.09280255  |
| 892  | DE00191 | 0 | 0.90854913 | 0.09145082  |
| 893  | DE13801 | 0 | 0.9125235  | 0.08747642  |
| 894  | DE08949 | 0 | 0.9136672  | 0.08633279  |
| 895  | DE15617 | 0 | 0.9137743  | 0.086225726 |
| 896  | DE01014 | 0 | 0.91382515 | 0.08617481  |
| 897  | DE14527 | 0 | 0.91401106 | 0.08598889  |
| 898  | DE06148 | 0 | 0.9158568  | 0.08414321  |
| 899  | DE11100 | 0 | 0.91694176 | 0.08305816  |
| 900  | DE12825 | 0 | 0.9189243  | 0.08107571  |
| 901  | DE11622 | 0 | 0.9209765  | 0.07902347  |
| 902  | DE04827 | 0 | 0.9212371  | 0.078762874 |
| 903  | DE01235 | 0 | 0.9214074  | 0.07859264  |
| 904  | DE11636 | 0 | 0.92255366 | 0.07744637  |
| 905  | DE08998 | 0 | 0.92607075 | 0.073292335 |
| 906  | DE00223 | 0 | 0.9262633  | 0.07373675  |
| 907  | DE08442 | 0 | 0.9270057  | 0.07299436  |
| 908  | DE14702 | 0 | 0.9273607  | 0.07263931  |
| 909  | DE01198 | 0 | 0.9287225  | 0.07127755  |
| 910  | DE00321 | 0 | 0.9289747  | 0.071025364 |
| 911  | DE05239 | 0 | 0.92913973 | 0.07086023  |
| 912  | DE00967 | 0 | 0.9295144  | 0.07048559  |
| 913  | DE00592 | 0 | 0.9310991  | 0.06890086  |
| 914  | DE11142 | 0 | 0.9314302  | 0.06855697  |
| 915  | DE12674 | 0 | 0.93210566 | 0.06789491  |
| 916  | DE00402 | 0 | 0.93229453 | 0.06750552  |
| 917  | DE13142 | 0 | 0.9336236  | 0.06637638  |
| 918  | DE11282 | 0 | 0.93464154 | 0.065358415 |
| 919  | DE04865 | 0 | 0.9350465  | 0.06495345  |
| 920  | DE09034 | 0 | 0.9351862  | 0.06481385  |
| 921  | DE12245 | 0 | 0.93522245 | 0.06477754  |
| 922  | DE15102 | 0 | 0.93557596 | 0.064424045 |
| 923  | DE00993 | 0 | 0.93596524 | 0.06403479  |
| 924  | DE05290 | 0 | 0.93799603 | 0.062903985 |
| 925  | DE01283 | 0 | 0.938871   | 0.061126222 |
| 926  | DE00280 | 0 | 0.939036   | 0.060963973 |
| 927  | DE00709 | 0 | 0.939362   | 0.060637955 |
| 928  | DE04224 | 0 | 0.93952864 | 0.06047136  |
| 929  | DE00839 | 0 | 0.9398558  | 0.0601442   |
| 930  | DE00859 | 0 | 0.9399411  | 0.060055956 |
| 931  | DE00377 | 0 | 0.9403335  | 0.059666466 |
| 932  | DE09121 | 0 | 0.94044197 | 0.059558053 |
| 933  | DE00585 | 0 | 0.94052446 | 0.059475522 |
| 934  | DE05676 | 0 | 0.9412747  | 0.058725264 |
| 935  | DE00577 | 0 | 0.94134164 | 0.058658228 |
| 936  | DE09409 | 0 | 0.9415555  | 0.05844448  |
| 937  | DE00287 | 0 | 0.9423812  | 0.057618804 |
| 938  | DE00315 | 0 | 0.9442936  | 0.055706337 |
| 939  | DE00989 | 0 | 0.94436836 | 0.05563164  |
| 940  | DE04845 | 0 | 0.94524693 | 0.05475312  |
| 941  | DE09125 | 0 | 0.9458071  | 0.0541929   |
| 942  | DE00697 | 0 | 0.94592214 | 0.05407785  |
| 943  | DE09340 | 0 | 0.9471733  | 0.052826714 |
| 944  | DE11127 | 0 | 0.9476579  | 0.052342124 |
| 945  | DE05528 | 0 | 0.9476989  | 0.052301116 |
| 946  | DE00885 | 0 | 0.9478001  | 0.052199908 |
| 947  | DE12141 | 0 | 0.949116   | 0.050883953 |
| 948  | DE00582 | 0 | 0.94937146 | 0.050628603 |
| 949  | DE14761 | 0 | 0.9500174  | 0.049982563 |
| 950  | DE00513 | 0 | 0.9502911  | 0.049708933 |
| 951  | DE01135 | 0 | 0.95056826 | 0.049431745 |
| 952  | DE13848 | 0 | 0.9507364  | 0.049263593 |
| 953  | DE09496 | 0 | 0.95083976 | 0.049160223 |
| 954  | DE00410 | 0 | 0.9513419  | 0.048558017 |
| 955  | DE11254 | 0 | 0.9513956  | 0.04838439  |
| 956  | DE00583 | 0 | 0.95324606 | 0.04675394  |
| 957  | DE09049 | 0 | 0.9533248  | 0.046675265 |
| 958  | DE11587 | 0 | 0.95340323 | 0.046596754 |
| 959  | DE09056 | 0 | 0.954276   | 0.045724045 |
| 960  | DE08842 | 0 | 0.9549881  | 0.045011863 |
| 961  | DE00666 | 0 | 0.9550094  | 0.04499053  |
| 962  | DE08933 | 0 | 0.9550612  | 0.044938847 |
| 963  | DE01065 | 0 | 0.9557126  | 0.044287387 |
| 964  | DE09059 | 0 | 0.9557794  | 0.044223057 |
| 965  | DE11075 | 0 | 0.9563824  | 0.043417536 |
| 966  | DE01086 | 0 | 0.95709485 | 0.04290512  |
| 967  | DE01229 | 0 | 0.95755696 | 0.042442985 |
| 968  | DE15328 | 0 | 0.957848   | 0.042151913 |
| 969  | DE00760 | 0 | 0.95791715 | 0.042082828 |
| 970  | DE12035 | 0 | 0.95798326 | 0.042016715 |
| 971  | DE09142 | 0 | 0.95798695 | 0.042013045 |
| 972  | DE09165 | 0 | 0.9582727  | 0.041727297 |
| 973  | DE09241 | 0 | 0.95857763 | 0.041422382 |
| 974  | DE01069 | 0 | 0.9596341  | 0.040365928 |
| 975  | DE00419 | 0 | 0.959785   | 0.04021504  |
| 976  | DE15479 | 0 | 0.9603515  | 0.039648518 |
| 977  | DE01123 | 0 | 0.96085864 | 0.039141405 |
| 978  | DE01178 | 0 | 0.96114826 | 0.038851727 |
| 979  | DE00174 | 0 | 0.9615482  | 0.038451746 |
| 980  | DE13253 | 0 | 0.9615782  | 0.038421772 |
| 981  | DE01628 | 0 | 0.9616667  | 0.038333286 |
| 982  | DE01122 | 0 | 0.96179724 | 0.038202725 |
| 983  | DE04209 | 0 | 0.962572   | 0.037422954 |
| 984  | DE06476 | 0 | 0.96269466 | 0.03733533  |
| 985  | DE00829 | 0 | 0.9627296  | 0.037271395 |
| 986  | DE01278 | 0 | 0.9631834  | 0.036816597 |
| 987  | DE15822 | 0 | 0.96319824 | 0.03680177  |
| 988  | DE06753 | 0 | 0.9634498  | 0.036550242 |
| 989  | DE06145 | 0 | 0.9638072  | 0.03619282  |
| 990  | DE11168 | 0 | 0.96403587 | 0.035964124 |
| 991  | DE14568 | 0 | 0.9643904  | 0.035609595 |
| 992  | DE00906 | 0 | 0.96457136 | 0.035428684 |
| 993  | DE09403 | 0 | 0.9647275  | 0.035272468 |
| 994  | DE08874 | 0 | 0.9648393  | 0.03516074  |
| 995  | DE09256 | 0 | 0.9657109  | 0.034289084 |
| 996  | DE00964 | 0 | 0.9658287  | 0.03417127  |
| 997  | DE11560 | 0 | 0.9659693  | 0.034030635 |
| 998  | DE00194 | 0 | 0.96610236 | 0.033897635 |
| 999  | DE00517 | 0 | 0.966145   | 0.033855006 |
| 1000 | DE08880 | 0 | 0.9664552  | 0.033544794 |
| 1001 | DE01544 | 0 | 0.9665763  | 0.033423714 |
| 1002 | DE01265 | 0 | 0.9668573  | 0.033142697 |
| 1003 | DE12466 | 0 | 0.9670366  | 0.03296940  |
| 1004 | DE13231 | 0 | 0.96792877 | 0.032071266 |
| 1005 | DE09137 | 0 | 0.9681478  | 0.031852134 |
| 1006 | DE00622 | 0 | 0.9681634  | 0.03183667  |
| 1007 | DE00933 | 0 | 0.96839476 | 0.031605236 |
| 1008 | DE00129 | 0 | 0.96847945 | 0.031520545 |
| 1009 | DE12783 | 0 | 0.9685254  | 0.0314746   |
| 1010 | DE00536 | 0 | 0.9685749  | 0.031425085 |
| 1011 | DE13620 | 0 | 0.96869004 | 0.03130995  |
| 1012 | DE13178 | 0 | 0.9687284  | 0.03127159  |
| 1013 | DE01205 | 0 | 0.96895897 | 0.03100414  |
| 1014 | DE11176 | 0 | 0.9694991  | 0.030508875 |
| 1015 | DE03312 | 0 | 0.9696433  | 0.030356685 |
| 1016 | DE00594 | 0 | 0.9699653  | 0.030034771 |
| 1017 | DE14001 | 0 | 0.96998423 | 0.030015785 |
| 1018 | DE01400 | 0 | 0.9700027  | 0.02999969  |
| 1019 | DE01621 | 0 | 0.9702871  | 0.029712927 |
| 1020 | DE01028 | 0 | 0.9702902  | 0.029709797 |
| 1021 | DE01409 | 0 | 0.9707182  | 0.02928176  |
| 1022 | DE12767 | 0 | 0.9708415  | 0.029155837 |
| 1023 | DE03028 | 0 | 0.97236943 | 0.027635534 |
| 1024 | DE11699 | 0 | 0.9723746  | 0.027625397 |
| 1025 | DE14569 | 0 | 0.9725036  | 0.027496366 |



|      |         |   |            |             |
|------|---------|---|------------|-------------|
| 1026 | DB01115 | 0 | 0.97278214 | 0.027217807 |
| 1027 | DB04931 | 0 | 0.9728817  | 0.027118323 |
| 1028 | DB08943 | 0 | 0.97303075 | 0.026969269 |
| 1029 | DB14783 | 0 | 0.9731285  | 0.026871487 |
| 1030 | DB04838 | 0 | 0.9731982  | 0.026801823 |
| 1031 | DB01165 | 0 | 0.97320247 | 0.026797554 |
| 1032 | DB12839 | 0 | 0.9732404  | 0.02675958  |
| 1033 | DB00892 | 0 | 0.9741105  | 0.025889471 |
| 1034 | DB06243 | 0 | 0.97414714 | 0.025852904 |
| 1035 | DB00944 | 0 | 0.9742449  | 0.025755165 |
| 1036 | DB03766 | 0 | 0.97430813 | 0.02569188  |
| 1037 | DB00580 | 0 | 0.9745548  | 0.025445193 |
| 1038 | DB14496 | 0 | 0.9746985  | 0.025301531 |
| 1039 | DB08871 | 0 | 0.9747945  | 0.02520554  |
| 1040 | DB00388 | 0 | 0.9748746  | 0.02512541  |
| 1041 | DB11231 | 0 | 0.9749189  | 0.025083063 |
| 1042 | DB09400 | 0 | 0.9750547  | 0.024945347 |
| 1043 | DB01204 | 0 | 0.9754074  | 0.024592577 |
| 1044 | DB06782 | 0 | 0.975603   | 0.024397047 |
| 1045 | DB06800 | 0 | 0.97571373 | 0.024286276 |
| 1046 | DB00420 | 0 | 0.97605056 | 0.023949424 |
| 1047 | DB00356 | 0 | 0.9762648  | 0.023735235 |
| 1048 | DB00789 | 0 | 0.9763564  | 0.023643661 |
| 1049 | DB14194 | 0 | 0.9769827  | 0.023017334 |
| 1050 | DB06723 | 0 | 0.977095   | 0.022904955 |
| 1051 | DB13259 | 0 | 0.9772209  | 0.022779064 |
| 1052 | DB09154 | 0 | 0.9777851  | 0.022214854 |
| 1053 | DB09324 | 0 | 0.9781982  | 0.021801826 |
| 1054 | DB00537 | 0 | 0.9785373  | 0.021462664 |
| 1055 | DB01006 | 0 | 0.9788352  | 0.021164784 |
| 1056 | DB09282 | 0 | 0.9788785  | 0.021121474 |
| 1057 | DB09413 | 0 | 0.9789661  | 0.021033881 |
| 1058 | DB15690 | 0 | 0.9790213  | 0.020978643 |
| 1059 | DB00638 | 0 | 0.9790377  | 0.020966237 |
| 1060 | DB12301 | 0 | 0.9791584  | 0.020841388 |
| 1061 | DB06785 | 0 | 0.9795179  | 0.020482127 |
| 1062 | DB14541 | 0 | 0.9796159  | 0.020384094 |
| 1063 | DB00247 | 0 | 0.9796668  | 0.020333199 |
| 1064 | DB06702 | 0 | 0.9797268  | 0.0202732   |
| 1065 | DB00817 | 0 | 0.9797437  | 0.020256262 |
| 1066 | DB08958 | 0 | 0.9798322  | 0.020167748 |
| 1067 | DB00792 | 0 | 0.9803257  | 0.019674309 |
| 1068 | DB00228 | 0 | 0.9804788  | 0.019521229 |
| 1069 | DB06823 | 0 | 0.9810657  | 0.018934345 |
| 1070 | DB00635 | 0 | 0.9811865  | 0.018813469 |
| 1071 | DB08988 | 0 | 0.9813653  | 0.018836514 |
| 1072 | DB01056 | 0 | 0.9814947  | 0.018805339 |
| 1073 | DB14193 | 0 | 0.9816256  | 0.018743383 |
| 1074 | DB09502 | 0 | 0.9820524  | 0.017947618 |
| 1075 | DB11342 | 0 | 0.98206264 | 0.017937342 |
| 1076 | DB00634 | 0 | 0.98234034 | 0.017659668 |
| 1077 | DB00897 | 0 | 0.98251015 | 0.017489806 |
| 1078 | DB12710 | 0 | 0.98263365 | 0.01736653  |
| 1079 | DB15444 | 0 | 0.9829017  | 0.01709827  |
| 1080 | DB00294 | 0 | 0.9829527  | 0.017047249 |
| 1081 | DB13288 | 0 | 0.9829947  | 0.017005378 |
| 1082 | DB13346 | 0 | 0.9830845  | 0.01691554  |
| 1083 | DB00314 | 0 | 0.98336524 | 0.016634732 |
| 1084 | DB01144 | 0 | 0.98343384 | 0.01656616  |
| 1085 | DB15679 | 0 | 0.98353946 | 0.016460523 |
| 1086 | DB01233 | 0 | 0.98374593 | 0.0162541   |
| 1087 | DB14754 | 0 | 0.98389184 | 0.016108101 |
| 1088 | DB13908 | 0 | 0.9841669  | 0.015833074 |
| 1089 | DB01282 | 0 | 0.9843051  | 0.015694955 |
| 1090 | DB13955 | 0 | 0.9844403  | 0.015559896 |
| 1091 | DB00209 | 0 | 0.9846144  | 0.0153857   |
| 1092 | DB00235 | 0 | 0.98465526 | 0.015344692 |
| 1093 | DB01167 | 0 | 0.9847713  | 0.015228687 |
| 1094 | DB00609 | 0 | 0.9848113  | 0.015188648 |
| 1095 | DB03247 | 0 | 0.9848341  | 0.015165949 |
| 1096 | DB00570 | 0 | 0.98497885 | 0.015021131 |
| 1097 | DB00179 | 0 | 0.9850445  | 0.014955584 |
| 1098 | DB00879 | 0 | 0.98544586 | 0.014554156 |
| 1099 | DB00151 | 0 | 0.985473   | 0.014528982 |
| 1100 | DB09089 | 0 | 0.9856283  | 0.014373754 |
| 1101 | DB01359 | 0 | 0.9857653  | 0.014234698 |
| 1102 | DB09473 | 0 | 0.9858292  | 0.014170799 |
| 1103 | DB08872 | 0 | 0.9859804  | 0.014019541 |
| 1104 | DB01083 | 0 | 0.9861407  | 0.013859307 |
| 1105 | DB11619 | 0 | 0.9861827  | 0.013817336 |
| 1106 | DB06230 | 0 | 0.98624647 | 0.013753584 |
| 1107 | DB01261 | 0 | 0.98653436 | 0.013465704 |
| 1108 | DB00898 | 0 | 0.98653735 | 0.01336264  |
| 1109 | DB08950 | 0 | 0.9865388  | 0.013344141 |
| 1110 | DB12713 | 0 | 0.9866862  | 0.013313806 |
| 1111 | DB08329 | 0 | 0.98678315 | 0.013216913 |
| 1112 | DB09374 | 0 | 0.98688835 | 0.013111668 |
| 1113 | DB09040 | 0 | 0.9869567  | 0.013043324 |
| 1114 | DB01145 | 0 | 0.98709434 | 0.01290571  |
| 1115 | DB11299 | 0 | 0.98726374 | 0.012736288 |
| 1116 | DB09131 | 0 | 0.98730975 | 0.012690925 |
| 1117 | DB13221 | 0 | 0.9874319  | 0.01256818  |
| 1118 | DB05381 | 0 | 0.987543   | 0.012457001 |
| 1119 | DB06778 | 0 | 0.9876324  | 0.012367593 |
| 1120 | DB08827 | 0 | 0.98776406 | 0.01223599  |
| 1121 | DB00250 | 0 | 0.98798496 | 0.012014995 |
| 1122 | DB01319 | 0 | 0.9879951  | 0.012004862 |
| 1123 | DB00639 | 0 | 0.9880257  | 0.011974286 |
| 1124 | DB01430 | 0 | 0.98826945 | 0.011730601 |
| 1125 | DB11828 | 0 | 0.9884193  | 0.011580735 |
| 1126 | DB06770 | 0 | 0.98851264 | 0.011487338 |
| 1127 | DB01201 | 0 | 0.9885184  | 0.011481508 |
| 1128 | DB00328 | 0 | 0.9887212  | 0.011278872 |
| 1129 | DB11363 | 0 | 0.9887975  | 0.011202438 |
| 1130 | DB00683 | 0 | 0.9891298  | 0.010870222 |
| 1131 | DB00675 | 0 | 0.9893538  | 0.010646201 |
| 1132 | DB12026 | 0 | 0.9894465  | 0.010553436 |
| 1133 | DB12404 | 0 | 0.98985785 | 0.010142094 |
| 1134 | DB09293 | 0 | 0.9898621  | 0.010137956 |
| 1135 | DB00548 | 0 | 0.98987865 | 0.01012136  |
| 1136 | DB04339 | 0 | 0.98989505 | 0.010104995 |
| 1137 | DB04871 | 0 | 0.9900338  | 0.009966209 |
| 1138 | DB00883 | 0 | 0.9901855  | 0.00991445  |
| 1139 | DB01206 | 0 | 0.9903319  | 0.009868185 |
| 1140 | DB00560 | 0 | 0.9904041  | 0.009859824 |
| 1141 | DB11586 | 0 | 0.9904544  | 0.009845549 |
| 1142 | DB11197 | 0 | 0.9905516  | 0.00944843  |
| 1143 | DB14203 | 0 | 0.9906352  | 0.009364774 |
| 1144 | DB01247 | 0 | 0.99066204 | 0.009338022 |
| 1145 | DB13680 | 0 | 0.9906625  | 0.009337528 |
| 1146 | DB00490 | 0 | 0.99074507 | 0.009254909 |
| 1147 | DB00217 | 0 | 0.9908283  | 0.009177175 |
| 1148 | DB06764 | 0 | 0.9909632  | 0.009096802 |
| 1149 | DB01135 | 0 | 0.99094594 | 0.0090541   |
| 1150 | DB01111 | 0 | 0.99095917 | 0.009040808 |
| 1151 | DB01005 | 0 | 0.9910042  | 0.008995787 |
| 1152 | DB09546 | 0 | 0.99100924 | 0.00899079  |
| 1153 | DB09513 | 0 | 0.9910306  | 0.008969371 |
| 1154 | DB14895 | 0 | 0.9910438  | 0.008956157 |
| 1155 | DB00551 | 0 | 0.9910521  | 0.008947834 |
| 1156 | DB15575 | 0 | 0.99105316 | 0.00894683  |
| 1157 | DB00864 | 0 | 0.9910806  | 0.008918457 |
| 1158 | DB00014 | 0 | 0.99112105 | 0.008878871 |
| 1159 | DB00027 | 0 | 0.9911527  | 0.008847263 |
| 1160 | DB04173 | 0 | 0.99115914 | 0.008840893 |

|      |         |   |            |             |
|------|---------|---|------------|-------------|
| 1161 | DB13751 | 0 | 0.9913099  | 0.008690092 |
| 1162 | DB00130 | 0 | 0.991389   | 0.008610979 |
| 1163 | DB01249 | 0 | 0.99140376 | 0.008596306 |
| 1164 | DB09366 | 0 | 0.9915365  | 0.008463454 |
| 1165 | DB00851 | 0 | 0.9915589  | 0.008441157 |
| 1166 | DB01365 | 0 | 0.9915589  | 0.008441106 |
| 1167 | DB00723 | 0 | 0.9915701  | 0.008429844 |
| 1168 | DB00979 | 0 | 0.991667   | 0.00833302  |
| 1169 | DB09236 | 0 | 0.991795   | 0.008205059 |
| 1170 | DB00483 | 0 | 0.99191886 | 0.008081149 |
| 1171 | DB01168 | 0 | 0.9919537  | 0.00804635  |
| 1172 | DB06594 | 0 | 0.9920779  | 0.007922039 |
| 1173 | DB00237 | 0 | 0.99207824 | 0.007921716 |
| 1174 | DB01273 | 0 | 0.99211097 | 0.007889013 |
| 1175 | DB00726 | 0 | 0.99213713 | 0.007862872 |
| 1176 | DB06261 | 0 | 0.9921389  | 0.007861123 |
| 1177 | DB00372 | 0 | 0.9922966  | 0.007733383 |
| 1178 | DB14188 | 0 | 0.9923098  | 0.007690165 |
| 1179 | DB01007 | 0 | 0.9923995  | 0.007600502 |
| 1180 | DB00862 | 0 | 0.99241155 | 0.007588452 |
| 1181 | DB00781 | 0 | 0.99252206 | 0.007477983 |
| 1182 | DB00177 | 0 | 0.99263215 | 0.007367897 |
| 1183 | DB00566 | 0 | 0.9926345  | 0.007365491 |
| 1184 | DB01273 | 0 | 0.9926925  | 0.007307522 |
| 1185 | DB00825 | 0 | 0.99278647 | 0.007213547 |
| 1186 | DB00730 | 0 | 0.9928332  | 0.007164718 |
| 1187 | DB13624 | 0 | 0.992871   | 0.007129066 |
| 1188 | DB00188 | 0 | 0.9928751  | 0.007124923 |
| 1189 | DB00751 | 0 | 0.99290836 | 0.007091679 |
| 1190 | DB01595 | 0 | 0.99296665 | 0.007033349 |
| 1191 | DB04822 | 0 | 0.9930074  | 0.006992559 |
| 1192 | DB15465 | 0 | 0.9930199  | 0.006980016 |
| 1193 | DB00604 | 0 | 0.9930553  | 0.006944759 |
| 1194 | DB00956 | 0 | 0.9930993  | 0.006930757 |
| 1195 | DB01139 | 0 | 0.9931021  | 0.006897917 |
| 1196 | DB09088 | 0 | 0.9931421  | 0.006857848 |
| 1197 | DB00121 | 0 | 0.9932461  | 0.006753856 |
| 1198 | DB06783 | 0 | 0.9933062  | 0.006693847 |
| 1199 | DB13874 | 0 | 0.9934534  | 0.006546598 |
| 1200 | DB00909 | 0 | 0.99347866 | 0.006521341 |
| 1201 | DB06267 | 0 | 0.9935174  | 0.006482647 |
| 1202 | DB00278 | 0 | 0.9935986  | 0.006401419 |
| 1203 | DB03310 | 0 | 0.99362165 | 0.006378383 |
| 1204 | DB09335 | 0 | 0.9936411  | 0.006355902 |
| 1205 | DB00708 | 0 | 0.99365566 | 0.006344469 |
| 1206 | DB00208 | 0 | 0.99366564 | 0.006333433 |
| 1207 | DB11129 | 0 | 0.9936702  | 0.006329792 |
| 1208 | DB00807 | 0 | 0.9937138  | 0.006286237 |
| 1209 | DB00224 | 0 | 0.9938028  | 0.006197197 |
| 1210 | DB00949 | 0 | 0.993856   | 0.006143997 |
| 1211 | DB06699 | 0 | 0.99386555 | 0.006134454 |
| 1212 | DB11273 | 0 | 0.99401087 | 0.005989118 |
| 1213 | DB00890 | 0 | 0.99401665 | 0.005983387 |
| 1214 | DB00426 | 0 | 0.9940384  | 0.005960554 |
| 1215 | DB00602 | 0 | 0.9940889  | 0.005911137 |
| 1216 | DB00135 | 0 | 0.99416566 | 0.005834366 |
| 1217 | DB14110 | 0 | 0.9941943  | 0.005805741 |
| 1218 | DB00887 | 0 | 0.99421245 | 0.005787554 |
| 1219 | DB00173 | 0 | 0.99421906 | 0.005780937 |
| 1220 | DB00080 | 0 | 0.9942655  | 0.005734549 |
| 1221 | DB00325 | 0 | 0.99431145 | 0.005688582 |
| 1222 | DB03904 | 0 | 0.9943146  | 0.005685346 |
| 1223 | DB14506 | 0 | 0.994354   | 0.00564603  |
| 1224 | DB00861 | 0 | 0.99446374 | 0.005583007 |
| 1225 | DB00196 | 0 | 0.9945522  | 0.00544782  |
| 1226 | DB14196 | 0 | 0.9945825  | 0.005417552 |
| 1227 | DB14199 | 0 | 0.99476814 | 0.005231831 |
| 1228 | DB11326 | 0 | 0.9947902  | 0.005209771 |
| 1229 | DB09158 | 0 | 0.9947942  | 0.005205838 |
| 1230 | DB01221 | 0 | 0.99480045 | 0.005199564 |
| 1231 | DB06268 | 0 | 0.9949457  | 0.005054252 |
| 1232 | DB06590 | 0 | 0.99502385 | 0.004976199 |
| 1233 | DB04846 | 0 | 0.9950245  | 0.004975511 |
| 1234 | DB09336 | 0 | 0.9950311  | 0.004968842 |
| 1235 | DB11826 | 0 | 0.995083   | 0.004917058 |
| 1236 | DB01166 | 0 | 0.99512225 | 0.004877757 |
| 1237 | DB11264 | 0 | 0.9951951  | 0.004804854 |
| 1238 | DB04880 | 0 | 0.99521166 | 0.004788329 |
| 1239 | DB06207 | 0 | 0.995214   | 0.004785955 |
| 1240 | DB14201 | 0 | 0.99532807 | 0.004671887 |
| 1241 | DB00733 | 0 | 0.9953382  | 0.004661776 |
| 1242 | DB11640 | 0 | 0.99545884 | 0.004541164 |
| 1243 | DB00128 | 0 | 0.99555004 | 0.004430019 |
| 1244 | DB12161 | 0 | 0.99556065 | 0.004393334 |
| 1245 | DB11835 | 0 | 0.9955675  | 0.004324469 |
| 1246 | DB01264 | 0 | 0.99561274 | 0.004387216 |
| 1247 | DB00658 | 0 | 0.99566394 | 0.004336029 |
| 1248 | DB03614 | 0 | 0.9956676  | 0.00433244  |
| 1249 | DB13421 | 0 | 0.99567646 | 0.004323504 |
| 1250 | DB13306 | 0 | 0.995682   | 0.004318006 |
| 1251 | DB00857 | 0 | 0.9956949  | 0.00430505  |
| 1252 | DB01245 | 0 | 0.99571425 | 0.004285692 |
| 1253 | DB11793 | 0 | 0.99588905 | 0.004119338 |
| 1254 | DB14498 | 0 | 0.9959771  | 0.004022518 |
| 1255 | DB12942 | 0 | 0.99603695 | 0.003963038 |
| 1256 | DB00152 | 0 | 0.9960425  | 0.003957504 |
| 1257 | DB06704 | 0 | 0.996058   | 0.003941994 |
| 1258 | DB00737 | 0 | 0.9960742  | 0.003925766 |
| 1259 | DB00660 | 0 | 0.9960828  | 0.003917137 |
| 1260 | DB01232 | 0 | 0.9960885  | 0.003911487 |
| 1261 | DB04946 | 0 | 0.99616325 | 0.003836698 |
| 1262 | DB00613 | 0 | 0.9961882  | 0.003811759 |
| 1263 | DB13720 | 0 | 0.99618834 | 0.003811701 |
| 1264 | DB06698 | 0 | 0.9961939  | 0.003806099 |
| 1265 | DB11348 | 0 | 0.996298   | 0.003702033 |
| 1266 | DB00633 | 0 | 0.99632347 | 0.003676503 |
| 1267 | DB06697 | 0 | 0.9963331  | 0.00366685  |
| 1268 | DB01095 | 0 | 0.9963374  | 0.003662586 |
| 1269 | DB13167 | 0 | 0.9963653  | 0.00363469  |
| 1270 | DB11584 | 0 | 0.9964006  | 0.003599435 |
| 1271 | DB04835 | 0 | 0.99649113 | 0.003508835 |
| 1272 | DB12070 | 0 | 0.9965204  | 0.003479659 |
| 1273 | DB02928 | 0 | 0.99652666 | 0.003473316 |
| 1274 | DB01708 | 0 | 0.9965635  | 0.003436508 |
| 1275 | DB00530 | 0 | 0.99659854 | 0.003401424 |
| 1276 | DB01382 | 0 | 0.9966343  | 0.003365673 |
| 1277 | DB14677 | 0 | 0.9966595  | 0.003340504 |
| 1278 | DB09276 | 0 | 0.9966666  | 0.003333357 |
| 1279 | DB14914 | 0 | 0.9966905  | 0.003309426 |
| 1280 | DB06335 | 0 | 0.99673635 | 0.00326367  |
| 1281 | DB11735 | 0 | 0.99673826 | 0.003261719 |
| 1282 | DB00193 | 0 | 0.99674195 | 0.003258016 |
| 1283 | DB00604 | 0 | 0.996765   | 0.003235004 |
| 1284 | DB01084 | 0 | 0.99680947 | 0.003191459 |
| 1285 | DB01026 | 0 | 0.99682045 | 0.003179576 |
| 1286 | DB00519 | 0 | 0.99688345 | 0.003116579 |
| 1287 | DB00497 | 0 | 0.9969047  | 0.003095362 |
| 1288 | DB00438 | 0 | 0.99690765 | 0.003092333 |
| 1289 | DB09395 | 0 | 0.99693763 | 0.00306236  |
| 1290 | DB04821 | 0 | 0.99694973 | 0.003050333 |
| 1291 | DB09242 | 0 | 0.9969574  | 0.003042637 |
| 1292 | DB00652 | 0 | 0.99701285 | 0.002987183 |
| 1293 | DB13147 | 0 | 0.99714405 | 0.002859994 |
| 1294 | DB00538 | 0 | 0.99720323 | 0.002796809 |
| 1295 | DB12667 | 0 | 0.9972179  | 0.002782048 |

|      |         |   |            |             |
|------|---------|---|------------|-------------|
| 1296 | DB11121 | 0 | 0.9972312  | 0.002768799 |
| 1297 | DB08887 | 0 | 0.997246   | 0.002754019 |
| 1298 | DB11327 | 0 | 0.9972543  | 0.002745739 |
| 1299 | DB02703 | 0 | 0.99725705 | 0.002742972 |
| 1300 | DB06694 | 0 | 0.9972675  | 0.002735505 |
| 1301 | DB00248 | 0 | 0.99731183 | 0.002688197 |
| 1302 | DB01638 | 0 | 0.9973242  | 0.002675743 |
| 1303 | DB00992 | 0 | 0.99733114 | 0.002668873 |
| 1304 | DB01219 | 0 | 0.9973724  | 0.002627568 |
| 1305 | DB00956 | 0 | 0.9973816  | 0.002618405 |
| 1306 | DB06144 | 0 | 0.99739337 | 0.002606606 |
| 1307 | DB03166 | 0 | 0.9974208  | 0.002579253 |
| 1308 | DB01137 | 0 | 0.99742967 | 0.002570275 |
| 1309 | DB00563 | 0 | 0.99752396 | 0.002476014 |
| 1310 | DB06807 | 0 | 0.99753404 | 0.002465909 |
| 1311 | DB02513 | 0 | 0.9975394  | 0.002463832 |
| 1312 | DB14202 | 0 | 0.9975395  | 0.002460513 |
| 1313 | DB00996 | 0 | 0.99755365 | 0.002446356 |
| 1314 | DB01240 | 0 | 0.99757415 | 0.002425902 |
| 1315 | DB11753 | 0 | 0.9975799  | 0.002420146 |
| 1316 | DB15685 | 0 | 0.99761045 | 0.002389585 |
| 1317 | DB00349 | 0 | 0.99763846 | 0.002361534 |
| 1318 | DB00265 | 0 | 0.99768806 | 0.002311984 |
| 1319 | DB00373 | 0 | 0.997728   | 0.002261963 |
| 1320 | DB01030 | 0 | 0.9977582  | 0.002241836 |
| 1321 | DB01037 | 0 | 0.9977659  | 0.002234083 |
| 1322 | DB11331 | 0 | 0.9978053  | 0.002194743 |
| 1323 | DB01018 | 0 | 0.997841   | 0.002158928 |
| 1324 | DB06813 | 0 | 0.99786    | 0.002140035 |
| 1325 | DB00728 | 0 | 0.99786335 | 0.002136686 |
| 1326 | DB01029 | 0 | 0.9978815  | 0.002118472 |
| 1327 | DB00605 | 0 | 0.99791807 | 0.002081988 |
| 1328 | DB14840 | 0 | 0.9979196  | 0.002080419 |
| 1329 | DB08905 | 0 | 0.99793327 | 0.002066728 |
| 1330 | DB00710 | 0 | 0.9979505  | 0.002049523 |
| 1331 | DB01044 | 0 | 0.99795794 | 0.002042018 |
| 1332 | DB00669 | 0 | 0.99796945 | 0.002030524 |
| 1333 | DB00923 | 0 | 0.9980122  | 0.001987804 |
| 1334 | DB08946 | 0 | 0.9980927  | 0.001907224 |
| 1335 | DB13872 | 0 | 0.9981092  | 0.001890776 |
| 1336 | DB06684 | 0 | 0.9981293  | 0.001870688 |
| 1337 | DB01351 | 0 | 0.9981352  | 0.001864789 |
| 1338 | DB11102 | 0 | 0.99816436 | 0.00183566  |
| 1339 | DB00937 | 0 | 0.99818486 | 0.001815977 |
| 1340 | DB00788 | 0 | 0.9982132  | 0.001788853 |
| 1341 | DB00984 | 0 | 0.99823123 | 0.001788852 |
| 1342 | DB00432 | 0 | 0.9982337  | 0.001769255 |
| 1343 | DB01158 | 0 | 0.9982388  | 0.001761171 |
| 1344 | DB01099 | 0 | 0.9982431  | 0.001756898 |
| 1345 | DB14845 | 0 | 0.99828184 | 0.001718147 |
| 1346 | DB11614 | 0 | 0.9983051  | 0.001694859 |
| 1347 | DB00554 | 0 | 0.9983558  | 0.001644172 |
| 1348 | DB00409 | 0 | 0.9983758  | 0.001624172 |
| 1349 | DB00671 | 0 | 0.9983923  | 0.001607747 |
| 1350 | DB09272 | 0 | 0.99841046 | 0.001589513 |
| 1351 | DB00545 | 0 | 0.99842    | 0.001579957 |
| 1352 | DB01090 | 0 | 0.998442   | 0.001558047 |
| 1353 | DB09380 | 0 | 0.9984534  | 0.001546666 |
| 1354 | DB00678 | 0 | 0.99845695 | 0.001542995 |
| 1355 | DB13838 | 0 | 0.9984597  | 0.001540257 |
| 1356 | DB00302 | 0 | 0.99848396 | 0.001516068 |
| 1357 | DB12602 | 0 | 0.9985102  | 0.001489859 |
| 1358 | DB00819 | 0 | 0.9985146  | 0.001485349 |
| 1359 | DB01656 | 0 | 0.9985312  | 0.001468811 |
| 1360 | DB12532 | 0 | 0.9985538  | 0.001461152 |
| 1361 | DB11837 | 0 | 0.9985599  | 0.001440058 |
| 1362 | DB00574 | 0 | 0.9985739  | 0.001426036 |
| 1363 | DB00318 | 0 | 0.99858665 | 0.001413368 |
| 1364 | DB00823 | 0 | 0.99859744 | 0.001402574 |
| 1365 | DB11279 | 0 | 0.99859923 | 0.001400717 |
| 1366 | DB03808 | 0 | 0.99861    | 0.001389934 |
| 1367 | DB13996 | 0 | 0.99863344 | 0.001366517 |
| 1368 | DB11274 | 0 | 0.99865603 | 0.001343934 |
| 1369 | DB01580 | 0 | 0.99866736 | 0.001326588 |
| 1370 | DB00284 | 0 | 0.998672   | 0.001323797 |
| 1371 | DB05990 | 0 | 0.99867696 | 0.001323041 |
| 1372 | DB01611 | 0 | 0.9986834  | 0.001316649 |
| 1373 | DB14089 | 0 | 0.9986986  | 0.001301353 |
| 1374 | DB00809 | 0 | 0.99872583 | 0.001274203 |
| 1375 | DB00206 | 0 | 0.99872786 | 0.001272123 |
| 1376 | DB00905 | 0 | 0.9987317  | 0.001268333 |
| 1377 | DB11278 | 0 | 0.99874926 | 0.001250757 |
| 1378 | DB00524 | 0 | 0.9987525  | 0.00124749  |
| 1379 | DB13444 | 0 | 0.9987534  | 0.00124532  |
| 1380 | DB13286 | 0 | 0.99878067 | 0.001219378 |
| 1381 | DB00724 | 0 | 0.99880826 | 0.0011918   |
| 1382 | DB03128 | 0 | 0.99881697 | 0.001183088 |
| 1383 | DB09420 | 0 | 0.99882    | 0.001179991 |
| 1384 | DB00645 | 0 | 0.9988211  | 0.001178945 |
| 1385 | DB00704 | 0 | 0.99882585 | 0.001174119 |
| 1386 | DB08899 | 0 | 0.99884987 | 0.001150131 |
| 1387 | DB13628 | 0 | 0.9988607  | 0.001139296 |
| 1388 | DB11219 | 0 | 0.9988722  | 0.001127743 |
| 1389 | DB00384 | 0 | 0.99889286 | 0.001114161 |
| 1390 | DB01176 | 0 | 0.9989317  | 0.001088337 |
| 1391 | DB00414 | 0 | 0.99895465 | 0.00104532  |
| 1392 | DB12455 | 0 | 0.9989761  | 0.001023873 |
| 1393 | DB00156 | 0 | 0.9989818  | 0.001018227 |
| 1394 | DB00749 | 0 | 0.99898595 | 0.001014012 |
| 1395 | DB13583 | 0 | 0.9989863  | 0.001013726 |
| 1396 | DB12278 | 0 | 0.99900526 | 0.000994744 |
| 1397 | DB11323 | 0 | 0.99900585 | 0.000994143 |
| 1398 | DB00272 | 0 | 0.9990065  | 0.000990459 |
| 1399 | DB00730 | 0 | 0.9990165  | 0.000985052 |
| 1400 | DB00151 | 0 | 0.9990288  | 0.000971261 |
| 1401 | DB01744 | 0 | 0.99903333 | 0.000966742 |
| 1402 | DB12332 | 0 | 0.9990495  | 0.000950459 |
| 1403 | DB00448 | 0 | 0.9990497  | 0.000950284 |
| 1404 | DB01173 | 0 | 0.9990754  | 0.00092459  |
| 1405 | DB11943 | 0 | 0.99907994 | 0.000920003 |
| 1406 | DB00578 | 0 | 0.99908185 | 0.000918188 |
| 1407 | DB00507 | 0 | 0.99909425 | 0.00090575  |
| 1408 | DB13345 | 0 | 0.99909663 | 0.000903344 |
| 1409 | DB11190 | 0 | 0.99910164 | 0.000898389 |
| 1410 | DB09510 | 0 | 0.99910504 | 0.000894974 |
| 1411 | DB03085 | 0 | 0.9991198  | 0.000880222 |
| 1412 | DB06802 | 0 | 0.999127   | 0.000873039 |
| 1413 | DB01075 | 0 | 0.9991516  | 0.000848434 |
| 1414 | DB01600 | 0 | 0.9991629  | 0.000837056 |
| 1415 | DB09085 | 0 | 0.9991709  | 0.000829163 |
| 1416 | DB01599 | 0 | 0.99917126 | 0.000828761 |
| 1417 | DB13180 | 0 | 0.99917454 | 0.000825389 |
| 1418 | DB11191 | 0 | 0.9991793  | 0.000820696 |
| 1419 | DB01764 | 0 | 0.9991923  | 0.000807738 |
| 1420 | DB00343 | 0 | 0.9992029  | 0.000797122 |
| 1421 | DB09063 | 0 | 0.99922    | 0.000799662 |
| 1422 | DB00795 | 0 | 0.99923897 | 0.000761064 |
| 1423 | DB00719 | 0 | 0.9992506  | 0.000749411 |
| 1424 | DB11855 | 0 | 0.9992555  | 0.000744527 |
| 1425 | DB01327 | 0 | 0.99925643 | 0.000743595 |
| 1426 | DB14174 | 0 | 0.99926585 | 0.000734157 |
| 1427 | DB00221 | 0 | 0.9992679  | 0.000732153 |
| 1428 | DB11590 | 0 | 0.9992754  | 0.000724672 |
| 1429 | DB13943 | 0 | 0.9992782  | 0.000723793 |
| 1430 | DB13707 | 0 | 0.9992774  | 0.000722562 |

|      |         |   |            |             |
|------|---------|---|------------|-------------|
| 1431 | DB01452 | 0 | 0.9992786  | 0.000721451 |
| 1432 | DB00290 | 0 | 0.9992976  | 0.000702397 |
| 1433 | DB01100 | 0 | 0.9992905  | 0.000700963 |
| 1434 | DB15678 | 0 | 0.9993036  | 0.000699539 |
| 1435 | DB00806 | 0 | 0.9993049  | 0.000699058 |
| 1436 | DB04272 | 0 | 0.9993063  | 0.000698623 |
| 1437 | DB00367 | 0 | 0.9993096  | 0.000698093 |
| 1438 | DB01243 | 0 | 0.9993104  | 0.000698589 |
| 1439 | DB14200 | 0 | 0.9993156  | 0.000684432 |
| 1440 | DB00239 | 0 | 0.9993161  | 0.000683964 |
| 1441 | DB06789 | 0 | 0.9993272  | 0.000672868 |
| 1442 | DB06153 | 0 | 0.9993303  | 0.000669731 |
| 1443 | DB04465 | 0 | 0.9993315  | 0.000668509 |
| 1444 | DB00254 | 0 | 0.9993333  | 0.000666677 |
| 1445 | DB00372 | 0 | 0.99933416 | 0.000665761 |
| 1446 | DB00469 | 0 | 0.9993382  | 0.000663815 |
| 1447 | DB13879 | 0 | 0.9993411  | 0.000663865 |
| 1448 | DB11189 | 0 | 0.9993464  | 0.000663536 |
| 1449 | DB09268 | 0 | 0.9993525  | 0.000647493 |
| 1450 | DB01325 | 0 | 0.9993549  | 0.000645113 |
| 1451 | DB00267 | 0 | 0.9993586  | 0.000641458 |
| 1452 | DB11275 | 0 | 0.9993635  | 0.000636583 |
| 1453 | DB15576 | 0 | 0.9993679  | 0.000632182 |
| 1454 | DB00324 | 0 | 0.9993716  | 0.000620759 |
| 1455 | DB09482 | 0 | 0.9993806  | 0.000609348 |
| 1456 | DB01154 | 0 | 0.9993945  | 0.000605408 |
| 1457 | DB01605 | 0 | 0.9994112  | 0.000588799 |
| 1458 | DB00986 | 0 | 0.9994197  | 0.000580337 |
| 1459 | DB11732 | 0 | 0.9994267  | 0.000577295 |
| 1460 | DB01066 | 0 | 0.9994302  | 0.000569761 |
| 1461 | DB08965 | 0 | 0.9994381  | 0.000561865 |
| 1462 | DB00779 | 0 | 0.9994438  | 0.000556168 |
| 1463 | DB00826 | 0 | 0.9994495  | 0.000550488 |
| 1464 | DB00962 | 0 | 0.9994536  | 0.000546385 |
| 1465 | DB01193 | 0 | 0.9994542  | 0.000545773 |
| 1466 | DB01157 | 0 | 0.9994567  | 0.000543479 |
| 1467 | DB00849 | 0 | 0.9994642  | 0.00053584  |
| 1468 | DB01259 | 0 | 0.9994694  | 0.000530677 |
| 1469 | DB06816 | 0 | 0.9994856  | 0.000514387 |
| 1470 | DB04908 | 0 | 0.9994975  | 0.000502428 |
| 1471 | DB12728 | 0 | 0.9995073  | 0.000492714 |
| 1472 | DB00365 | 0 | 0.9995147  | 0.000485298 |
| 1473 | DB09031 | 0 | 0.9995186  | 0.000484328 |
| 1474 | DB00990 | 0 | 0.9995183  | 0.000481684 |
| 1475 | DB01501 | 0 | 0.9995217  | 0.000478295 |
| 1476 | DB01369 | 0 | 0.9995222  | 0.000477747 |
| 1477 | DB03796 | 0 | 0.9995235  | 0.000476545 |
| 1478 | DB15035 | 0 | 0.9995266  | 0.000473346 |
| 1479 | DB04573 | 0 | 0.9995278  | 0.000472212 |
| 1480 | DB00436 | 0 | 0.9995305  | 0.000469462 |
| 1481 | DB06794 | 0 | 0.99954    | 0.000460002 |
| 1482 | DB00900 | 0 | 0.9995641  | 0.000435884 |
| 1483 | DB04953 | 0 | 0.9995765  | 0.000429454 |
| 1484 | DB00464 | 0 | 0.9995786  | 0.000420553 |
| 1485 | DB11611 | 0 | 0.9995808  | 0.000419184 |
| 1486 | DB11823 | 0 | 0.9995865  | 0.000413506 |
| 1487 | DB09265 | 0 | 0.9995884  | 0.000411522 |
| 1488 | DB00593 | 0 | 0.99958926 | 0.000410745 |
| 1489 | DB01068 | 0 | 0.99958926 | 0.000410687 |
| 1490 | DB00184 | 0 | 0.9995906  | 0.00040938  |
| 1491 | DB08890 | 0 | 0.9995925  | 0.000407475 |
| 1492 | DB08864 | 0 | 0.9995939  | 0.000406053 |
| 1493 | DB11591 | 0 | 0.99959725 | 0.000402736 |
| 1494 | DB00336 | 0 | 0.999602   | 0.000398024 |
| 1495 | DB02959 | 0 | 0.9996043  | 0.000395789 |
| 1496 | DB14753 | 0 | 0.9996064  | 0.000393557 |
| 1497 | DB04564 | 0 | 0.9996153  | 0.000384667 |
| 1498 | DB06706 | 0 | 0.9996154  | 0.000384493 |
| 1499 | DB00473 | 0 | 0.9996197  | 0.000380281 |
| 1500 | DB09065 | 0 | 0.99961996 | 0.00038002  |
| 1501 | DB11431 | 0 | 0.9996227  | 0.000377324 |
| 1502 | DB13595 | 0 | 0.99962616 | 0.000373855 |
| 1503 | DB00717 | 0 | 0.9996278  | 0.000372108 |
| 1504 | DB00308 | 0 | 0.99963045 | 0.000369514 |
| 1505 | DB06196 | 0 | 0.9996308  | 0.000369381 |
| 1506 | DB11182 | 0 | 0.9996418  | 0.000358256 |
| 1507 | DB13501 | 0 | 0.9996449  | 0.000355124 |
| 1508 | DB09149 | 0 | 0.999647   | 0.000352964 |
| 1509 | DB00474 | 0 | 0.9996475  | 0.000352508 |
| 1510 | DB00799 | 0 | 0.9996512  | 0.000348815 |
| 1511 | DB01255 | 0 | 0.9996524  | 0.000347569 |
| 1512 | DB00978 | 0 | 0.9996538  | 0.000346128 |
| 1513 | DB13882 | 0 | 0.9996606  | 0.000339377 |
| 1514 | DB11978 | 0 | 0.9996631  | 0.000336911 |
| 1515 | DB01012 | 0 | 0.9996649  | 0.000335096 |
| 1516 | DB01331 | 0 | 0.9996676  | 0.000332329 |
| 1517 | DB00368 | 0 | 0.9996692  | 0.000330822 |
| 1518 | DB08908 | 0 | 0.9996697  | 0.000330298 |
| 1519 | DB04794 | 0 | 0.99967766 | 0.000323251 |
| 1520 | DB12328 | 0 | 0.99968016 | 0.0003198   |
| 1521 | DB12887 | 0 | 0.99968135 | 0.000318614 |
| 1522 | DB06784 | 0 | 0.9996829  | 0.000317104 |
| 1523 | DB09570 | 0 | 0.9996883  | 0.00031699  |
| 1524 | DB00869 | 0 | 0.9996886  | 0.000311192 |
| 1525 | DB01297 | 0 | 0.9996892  | 0.000310802 |
| 1526 | DB08941 | 0 | 0.9996942  | 0.000305811 |
| 1527 | DB15534 | 0 | 0.9996962  | 0.000304833 |
| 1528 | DB06788 | 0 | 0.99969554 | 0.000304445 |
| 1529 | DB11712 | 0 | 0.99969804 | 0.000301943 |
| 1530 | DB14879 | 0 | 0.99969876 | 0.000301316 |
| 1531 | DB06762 | 0 | 0.9997012  | 0.000298751 |
| 1532 | DB11210 | 0 | 0.9997013  | 0.000298622 |
| 1533 | DB00947 | 0 | 0.99970394 | 0.000295985 |
| 1534 | DB00140 | 0 | 0.999705   | 0.000294915 |
| 1535 | DB00742 | 0 | 0.99970645 | 0.000293514 |
| 1536 | DB01333 | 0 | 0.9997073  | 0.000292666 |
| 1537 | DB00251 | 0 | 0.99970824 | 0.000291714 |
| 1538 | DB00158 | 0 | 0.99970907 | 0.000290856 |
| 1539 | DB00462 | 0 | 0.9997147  | 0.000285352 |
| 1540 | DB01020 | 0 | 0.9997179  | 0.000282038 |
| 1541 | DB00562 | 0 | 0.9997185  | 0.000281546 |
| 1542 | DB08877 | 0 | 0.9997248  | 0.000275176 |
| 1543 | DB00757 | 0 | 0.9997281  | 0.000270865 |
| 1544 | DB14096 | 0 | 0.9997354  | 0.000264624 |
| 1545 | DB01576 | 0 | 0.99973756 | 0.000262524 |
| 1546 | DB12097 | 0 | 0.99974185 | 0.00025818  |
| 1547 | DB12612 | 0 | 0.9997477  | 0.000252307 |
| 1548 | DB13257 | 0 | 0.99975175 | 0.000248254 |
| 1549 | DB01418 | 0 | 0.99975437 | 0.000245656 |
| 1550 | DB09516 | 0 | 0.9997547  | 0.000245243 |
| 1551 | DB06712 | 0 | 0.9997547  | 0.000245214 |
| 1552 | DB13682 | 0 | 0.99975556 | 0.000244491 |
| 1553 | DB00489 | 0 | 0.99975723 | 0.000242481 |
| 1554 | DB00863 | 0 | 0.99976057 | 0.000238399 |
| 1555 | DB12371 | 0 | 0.9997614  | 0.000238553 |
| 1556 | DB01156 | 0 | 0.99976295 | 0.000237032 |
| 1557 | DB00301 | 0 | 0.99976546 | 0.000234541 |
| 1558 | DB13323 | 0 | 0.9997657  | 0.000234279 |
| 1559 | DB08865 | 0 | 0.9997707  | 0.000229292 |
| 1560 | DB00035 | 0 | 0.99977094 | 0.000229025 |
| 1561 | DB01042 | 0 | 0.99977845 | 0.000221619 |
| 1562 | DB00735 | 0 | 0.99978036 | 0.000219599 |
| 1563 | DB01559 | 0 | 0.99978274 | 0.000217307 |
| 1564 | DB06211 | 0 | 0.99978477 | 0.000215218 |
| 1565 | DB11583 | 0 | 0.9997869  | 0.000213144 |

|      |         |   |            |             |
|------|---------|---|------------|-------------|
| 1566 | DR00182 | 0 | 0.99979204 | 0.000207949 |
| 1567 | DR02546 | 0 | 0.99979275 | 0.000207213 |
| 1568 | DR00413 | 0 | 0.99979764 | 0.000202413 |
| 1569 | DR01085 | 0 | 0.99979824 | 0.000201728 |
| 1570 | DR13665 | 0 | 0.99979895 | 0.000201082 |
| 1571 | DR01031 | 0 | 0.999801   | 0.000198997 |
| 1572 | DR11332 | 0 | 0.99980146 | 0.000198569 |
| 1573 | DR09350 | 0 | 0.9998024  | 0.000197657 |
| 1574 | DR01440 | 0 | 0.99980265 | 0.000197414 |
| 1575 | DR01274 | 0 | 0.999803   | 0.000197039 |
| 1576 | DR01339 | 0 | 0.99980444 | 0.000195526 |
| 1577 | DR00397 | 0 | 0.9998087  | 0.000191243 |
| 1578 | DR09270 | 0 | 0.9998091  | 0.000190976 |
| 1579 | DR11235 | 0 | 0.9998091  | 0.000190971 |
| 1580 | DR02362 | 0 | 0.9998099  | 0.000190127 |
| 1581 | DR09874 | 0 | 0.99981584 | 0.00018444  |
| 1582 | DR03175 | 0 | 0.9998159  | 0.000184156 |
| 1583 | DR00780 | 0 | 0.9998179  | 0.000182072 |
| 1584 | DR08895 | 0 | 0.999819   | 0.000181089 |
| 1585 | DR06603 | 0 | 0.99981946 | 0.000180581 |
| 1586 | DR12329 | 0 | 0.9998217  | 0.000178341 |
| 1587 | DR01180 | 0 | 0.999824   | 0.000176058 |
| 1588 | DR13657 | 0 | 0.99982613 | 0.000173926 |
| 1589 | DR00586 | 0 | 0.9998265  | 0.000173495 |
| 1590 | DR00018 | 0 | 0.9998266  | 0.000173364 |
| 1591 | DR08882 | 0 | 0.99982786 | 0.000172079 |
| 1592 | DR06204 | 0 | 0.999828   | 0.000171962 |
| 1593 | DR01016 | 0 | 0.9998294  | 0.000170532 |
| 1594 | DR11738 | 0 | 0.9998318  | 0.000168138 |
| 1595 | DR05271 | 0 | 0.9998387  | 0.000161311 |
| 1596 | DR13292 | 0 | 0.99984    | 0.000160009 |
| 1597 | DR00233 | 0 | 0.9998406  | 0.00015934  |
| 1598 | DR11089 | 0 | 0.9998448  | 0.000155205 |
| 1599 | DR00340 | 0 | 0.99984574 | 0.00015422  |
| 1600 | DR09076 | 0 | 0.99984634 | 0.000153591 |
| 1601 | DR00575 | 0 | 0.9998467  | 0.000153313 |
| 1602 | DR00976 | 0 | 0.99984694 | 0.00015302  |
| 1603 | DR09512 | 0 | 0.99984956 | 0.000150429 |
| 1604 | DR06595 | 0 | 0.99984956 | 0.000150397 |
| 1605 | DR00874 | 0 | 0.9998534  | 0.000146658 |
| 1606 | DR02701 | 0 | 0.99985695 | 0.000142988 |
| 1607 | DR09090 | 0 | 0.99985695 | 0.000142973 |
| 1608 | DR09195 | 0 | 0.99985754 | 0.000142479 |
| 1609 | DR08909 | 0 | 0.99985886 | 0.000141182 |
| 1610 | DR01626 | 0 | 0.9998592  | 0.000140768 |
| 1611 | DR00437 | 0 | 0.99985945 | 0.000140534 |
| 1612 | DR00852 | 0 | 0.9998609  | 0.000137022 |
| 1613 | DR08932 | 0 | 0.99986374 | 0.00013628  |
| 1614 | DR09543 | 0 | 0.9998641  | 0.000135918 |
| 1615 | DR01124 | 0 | 0.9998652  | 0.000134813 |
| 1616 | DR13711 | 0 | 0.9998652  | 0.000134793 |
| 1617 | DR00951 | 0 | 0.9998667  | 0.000133297 |
| 1618 | DR14627 | 0 | 0.9998671  | 0.000132944 |
| 1619 | DR15598 | 0 | 0.99986744 | 0.0001328   |
| 1620 | DR01591 | 0 | 0.99986994 | 0.000130011 |
| 1621 | DR00335 | 0 | 0.9998703  | 0.000129628 |
| 1622 | DR00969 | 0 | 0.99987304 | 0.000126986 |
| 1623 | DR01208 | 0 | 0.99987495 | 0.000125062 |
| 1624 | DR14198 | 0 | 0.999879   | 0.000121009 |
| 1625 | DR13213 | 0 | 0.9998796  | 0.000120331 |
| 1626 | DR13235 | 0 | 0.9998814  | 0.000118548 |
| 1627 | DR01228 | 0 | 0.9998864  | 0.000113603 |
| 1628 | DR00142 | 0 | 0.9998867  | 0.000113027 |
| 1629 | DR00137 | 0 | 0.9998884  | 0.000111523 |
| 1630 | DR01294 | 0 | 0.9998895  | 0.000110494 |
| 1631 | DR15873 | 0 | 0.9998901  | 0.000109939 |
| 1632 | DR00131 | 0 | 0.9998902  | 0.000109811 |
| 1633 | DR01438 | 0 | 0.99989045 | 0.000109502 |
| 1634 | DR00357 | 0 | 0.9998939  | 0.000106039 |
| 1635 | DR13074 | 0 | 0.99989414 | 0.000105858 |
| 1636 | DR11799 | 0 | 0.99989426 | 0.000105758 |
| 1637 | DR01171 | 0 | 0.99989533 | 0.00010463  |
| 1638 | DR09483 | 0 | 0.9998969  | 0.00010316  |
| 1639 | DR05316 | 0 | 0.9998969  | 0.000103152 |
| 1640 | DR11641 | 0 | 0.9998982  | 0.000101775 |
| 1641 | DR03209 | 0 | 0.99989855 | 0.000101423 |
| 1642 | DR06791 | 0 | 0.99989927 | 0.000100703 |
| 1643 | DR00383 | 0 | 0.9999012  | 9.88E-05    |
| 1644 | DR04840 | 0 | 0.99990165 | 9.83E-05    |
| 1645 | DR01262 | 0 | 0.9999032  | 9.68E-05    |
| 1646 | DR06751 | 0 | 0.99990666 | 9.34E-05    |
| 1647 | DR13925 | 0 | 0.9999068  | 9.32E-05    |
| 1648 | DR00739 | 0 | 0.999907   | 9.30E-05    |
| 1649 | DR01155 | 0 | 0.9999082  | 9.18E-05    |
| 1650 | DR00434 | 0 | 0.99990857 | 9.15E-05    |
| 1651 | DR00178 | 0 | 0.99990904 | 9.10E-05    |
| 1652 | DR06016 | 0 | 0.9999094  | 9.06E-05    |
| 1653 | DR09092 | 0 | 0.9999094  | 9.06E-05    |
| 1654 | DR06820 | 0 | 0.99990976 | 9.03E-05    |
| 1655 | DR09075 | 0 | 0.99990976 | 9.03E-05    |
| 1656 | DR08799 | 0 | 0.99990976 | 9.02E-05    |
| 1657 | DR08820 | 0 | 0.99991035 | 8.96E-05    |
| 1658 | DR06995 | 0 | 0.9999124  | 8.76E-05    |
| 1659 | DR06899 | 0 | 0.99991274 | 8.72E-05    |
| 1660 | DR05057 | 0 | 0.999913   | 8.71E-05    |
| 1661 | DR00441 | 0 | 0.9999132  | 8.68E-05    |
| 1662 | DR01174 | 0 | 0.9999157  | 8.43E-05    |
| 1663 | DR06628 | 0 | 0.99991643 | 8.35E-05    |
| 1664 | DR09136 | 0 | 0.99991727 | 8.27E-05    |
| 1665 | DR00106 | 0 | 0.9999186  | 8.15E-05    |
| 1666 | DR06065 | 0 | 0.99991906 | 8.10E-05    |
| 1667 | DR11815 | 0 | 0.9999198  | 8.03E-05    |
| 1668 | DR01150 | 0 | 0.9999207  | 7.93E-05    |
| 1669 | DR01045 | 0 | 0.99992085 | 7.91E-05    |
| 1670 | DR00803 | 0 | 0.99992156 | 7.84E-05    |
| 1671 | DR04574 | 0 | 0.9999223  | 7.77E-05    |
| 1672 | DR09216 | 0 | 0.9999224  | 7.76E-05    |
| 1673 | DR11260 | 0 | 0.9999225  | 7.75E-05    |
| 1674 | DR03193 | 0 | 0.99992406 | 7.59E-05    |
| 1675 | DR01226 | 0 | 0.9999243  | 7.57E-05    |
| 1676 | DR06210 | 0 | 0.99992454 | 7.55E-05    |
| 1677 | DR14186 | 0 | 0.99992585 | 7.41E-05    |
| 1678 | DR00198 | 0 | 0.99992674 | 7.26E-05    |
| 1679 | DR09087 | 0 | 0.9999281  | 7.19E-05    |
| 1680 | DR12300 | 0 | 0.99993014 | 6.99E-05    |
| 1681 | DR00502 | 0 | 0.99993014 | 6.98E-05    |
| 1682 | DR01080 | 0 | 0.99993134 | 6.86E-05    |
| 1683 | DR06713 | 0 | 0.9999325  | 6.75E-05    |
| 1684 | DR00584 | 0 | 0.9999343  | 6.56E-05    |
| 1685 | DR01268 | 0 | 0.99993443 | 6.56E-05    |
| 1686 | DR00398 | 0 | 0.99993443 | 6.56E-05    |
| 1687 | DR00234 | 0 | 0.9999347  | 6.53E-05    |
| 1688 | DR09073 | 0 | 0.99993765 | 6.24E-05    |
| 1689 | DR11596 | 0 | 0.99993813 | 6.19E-05    |
| 1690 | DR11994 | 0 | 0.9999392  | 6.08E-05    |
| 1691 | DR00330 | 0 | 0.9999393  | 6.07E-05    |
| 1692 | DR08828 | 0 | 0.9999399  | 6.01E-05    |
| 1693 | DR13114 | 0 | 0.9999399  | 6.00E-05    |
| 1694 | DR01054 | 0 | 0.9999399  | 6.00E-05    |
| 1695 | DR00945 | 0 | 0.9999404  | 5.96E-05    |
| 1696 | DR00904 | 0 | 0.9999411  | 5.89E-05    |
| 1697 | DR13248 | 0 | 0.9999428  | 5.72E-05    |
| 1698 | DR03000 | 0 | 0.9999436  | 5.64E-05    |
| 1699 | DR14530 | 0 | 0.99994373 | 5.63E-05    |
| 1700 | DR14176 | 0 | 0.9999442  | 5.58E-05    |

|      |         |   |            |          |
|------|---------|---|------------|----------|
| 1701 | DB13766 | 0 | 0,99994445 | 5,55E-05 |
| 1702 | DB01179 | 0 | 0,9999454  | 5,46E-05 |
| 1703 | DB11125 | 0 | 0,99994576 | 5,43E-05 |
| 1704 | DB06788 | 0 | 0,9999465  | 5,35E-05 |
| 1705 | DB00485 | 0 | 0,9999474  | 5,23E-05 |
| 1706 | DB01076 | 0 | 0,99994753 | 5,23E-05 |
| 1707 | DB05219 | 0 | 0,9999478  | 5,23E-05 |
| 1708 | DB04812 | 0 | 0,99994874 | 5,13E-05 |
| 1709 | DB12938 | 0 | 0,999949   | 5,10E-05 |
| 1710 | DB00561 | 0 | 0,999949   | 5,10E-05 |
| 1711 | DB01839 | 0 | 0,9999498  | 5,02E-05 |
| 1712 | DB00878 | 0 | 0,99995255 | 4,74E-05 |
| 1713 | DB00567 | 0 | 0,99995327 | 4,67E-05 |
| 1714 | DB00503 | 0 | 0,9999534  | 4,66E-05 |
| 1715 | DB00145 | 0 | 0,9999534  | 4,66E-05 |
| 1716 | DB02530 | 0 | 0,9999541  | 4,59E-05 |
| 1717 | DB01170 | 0 | 0,9999546  | 4,54E-05 |
| 1718 | DB00485 | 0 | 0,9999553  | 4,46E-05 |
| 1719 | DB00310 | 0 | 0,99995625 | 4,38E-05 |
| 1720 | DB00755 | 0 | 0,9999567  | 4,33E-05 |
| 1721 | DB00671 | 0 | 0,9999578  | 4,22E-05 |
| 1722 | DB00175 | 0 | 0,99995804 | 4,19E-05 |
| 1723 | DB15779 | 0 | 0,9999585  | 4,15E-05 |
| 1724 | DB09039 | 0 | 0,9999589  | 4,11E-05 |
| 1725 | DB06403 | 0 | 0,999959   | 4,10E-05 |
| 1726 | DB14725 | 0 | 0,9999597  | 4,03E-05 |
| 1727 | DB13985 | 0 | 0,99995965 | 4,01E-05 |
| 1728 | DB01003 | 0 | 0,9999608  | 3,92E-05 |
| 1729 | DB12554 | 0 | 0,9999614  | 3,87E-05 |
| 1730 | DB01241 | 0 | 0,99996257 | 3,74E-05 |
| 1731 | DB06077 | 0 | 0,9999628  | 3,72E-05 |
| 1732 | DB00953 | 0 | 0,99996305 | 3,69E-05 |
| 1733 | DB14197 | 0 | 0,99996376 | 3,62E-05 |
| 1734 | DB14723 | 0 | 0,999964   | 3,60E-05 |
| 1735 | DB01384 | 0 | 0,99996436 | 3,56E-05 |
| 1736 | DB00714 | 0 | 0,99996483 | 3,52E-05 |
| 1737 | DB00794 | 0 | 0,99996614 | 3,38E-05 |
| 1738 | DB14007 | 0 | 0,9999665  | 3,35E-05 |
| 1739 | DB01102 | 0 | 0,99996746 | 3,26E-05 |
| 1740 | DB06691 | 0 | 0,9999676  | 3,24E-05 |
| 1741 | DB01032 | 0 | 0,9999677  | 3,23E-05 |
| 1742 | DB00320 | 0 | 0,9999682  | 3,18E-05 |
| 1743 | DB00461 | 0 | 0,9999684  | 3,16E-05 |
| 1744 | DB00299 | 0 | 0,9999684  | 3,16E-05 |
| 1745 | DB02041 | 0 | 0,9999685  | 3,15E-05 |
| 1746 | DB14487 | 0 | 0,99996877 | 3,12E-05 |
| 1747 | DB01581 | 0 | 0,99996877 | 3,12E-05 |
| 1748 | DB00491 | 0 | 0,999969   | 3,09E-05 |
| 1749 | DB08604 | 0 | 0,99996936 | 3,06E-05 |
| 1750 | DB00914 | 0 | 0,99996936 | 3,06E-05 |
| 1751 | DB11796 | 0 | 0,9999696  | 3,04E-05 |
| 1752 | DB04711 | 0 | 0,99996996 | 3,00E-05 |
| 1753 | DB00975 | 0 | 0,9999701  | 2,99E-05 |
| 1754 | DB09269 | 0 | 0,9999709  | 2,91E-05 |
| 1755 | DB08942 | 0 | 0,99997115 | 2,88E-05 |
| 1756 | DB01602 | 0 | 0,9999715  | 2,85E-05 |
| 1757 | DB09055 | 0 | 0,99997187 | 2,81E-05 |
| 1758 | DB09220 | 0 | 0,9999722  | 2,78E-05 |
| 1759 | DB01105 | 0 | 0,9999727  | 2,74E-05 |
| 1760 | DB00104 | 0 | 0,99997294 | 2,71E-05 |
| 1761 | DB01067 | 0 | 0,9999732  | 2,68E-05 |
| 1762 | DB06815 | 0 | 0,99997354 | 2,64E-05 |
| 1763 | DB00844 | 0 | 0,9999738  | 2,63E-05 |
| 1764 | DB00423 | 0 | 0,9999738  | 2,62E-05 |
| 1765 | DB07776 | 0 | 0,99997425 | 2,57E-05 |
| 1766 | DB13153 | 0 | 0,9999745  | 2,55E-05 |
| 1767 | DB01089 | 0 | 0,99997485 | 2,51E-05 |
| 1768 | DB01563 | 0 | 0,99997544 | 2,45E-05 |
| 1769 | DB06709 | 0 | 0,9999757  | 2,43E-05 |
| 1770 | DB13279 | 0 | 0,9999757  | 2,43E-05 |
| 1771 | DB01251 | 0 | 0,99997616 | 2,38E-05 |
| 1772 | DB00812 | 0 | 0,99997663 | 2,33E-05 |
| 1773 | DB06151 | 0 | 0,999977   | 2,30E-05 |
| 1774 | DB13222 | 0 | 0,99997735 | 2,27E-05 |
| 1775 | DB04288 | 0 | 0,9999777  | 2,23E-05 |
| 1776 | DB04815 | 0 | 0,9999783  | 2,18E-05 |
| 1777 | DB04938 | 0 | 0,9999783  | 2,17E-05 |
| 1778 | DB11942 | 0 | 0,99997914 | 2,08E-05 |
| 1779 | DB01575 | 0 | 0,99997926 | 2,07E-05 |
| 1780 | DB00595 | 0 | 0,9999794  | 2,07E-05 |
| 1781 | DB04841 | 0 | 0,9999794  | 2,06E-05 |
| 1782 | DB09042 | 0 | 0,99997985 | 2,01E-05 |
| 1783 | DB14019 | 0 | 0,99998    | 2,00E-05 |
| 1784 | DB03841 | 0 | 0,99998    | 2,00E-05 |
| 1785 | DB11791 | 0 | 0,9999802  | 1,98E-05 |
| 1786 | DB00983 | 0 | 0,9999802  | 1,98E-05 |
| 1787 | DB13284 | 0 | 0,99998057 | 1,94E-05 |
| 1788 | DB01186 | 0 | 0,9999808  | 1,92E-05 |
| 1789 | DB00258 | 0 | 0,99998105 | 1,89E-05 |
| 1790 | DB11201 | 0 | 0,99998116 | 1,88E-05 |
| 1791 | DB00346 | 0 | 0,9999813  | 1,88E-05 |
| 1792 | DB14175 | 0 | 0,9999813  | 1,87E-05 |
| 1793 | DB00263 | 0 | 0,9999814  | 1,86E-05 |
| 1794 | DB00091 | 0 | 0,9999814  | 1,86E-05 |
| 1795 | DB09115 | 0 | 0,9999815  | 1,84E-05 |
| 1796 | DB01296 | 0 | 0,99998176 | 1,82E-05 |
| 1797 | DB13952 | 0 | 0,9999825  | 1,76E-05 |
| 1798 | DB01128 | 0 | 0,9999826  | 1,75E-05 |
| 1799 | DB11284 | 0 | 0,9999827  | 1,73E-05 |
| 1800 | DB00244 | 0 | 0,99998283 | 1,71E-05 |
| 1801 | DB00832 | 0 | 0,99998295 | 1,70E-05 |
| 1802 | DB00139 | 0 | 0,9999831  | 1,70E-05 |
| 1803 | DB13909 | 0 | 0,99998343 | 1,66E-05 |
| 1804 | DB00387 | 0 | 0,99998343 | 1,66E-05 |
| 1805 | DB01187 | 0 | 0,99998343 | 1,66E-05 |
| 1806 | DB00756 | 0 | 0,99998343 | 1,65E-05 |
| 1807 | DB06212 | 0 | 0,99998367 | 1,63E-05 |
| 1808 | DB09320 | 0 | 0,9999845  | 1,55E-05 |
| 1809 | DB00157 | 0 | 0,9999845  | 1,54E-05 |
| 1810 | DB00938 | 0 | 0,9999846  | 1,54E-05 |
| 1811 | DB05018 | 0 | 0,99998486 | 1,52E-05 |
| 1812 | DB01200 | 0 | 0,999985   | 1,50E-05 |
| 1813 | DB01210 | 0 | 0,9999851  | 1,49E-05 |
| 1814 | DB15494 | 0 | 0,9999852  | 1,48E-05 |
| 1815 | DB09082 | 0 | 0,99998534 | 1,47E-05 |
| 1816 | DB00210 | 0 | 0,99998605 | 1,39E-05 |
| 1817 | DB09148 | 0 | 0,9999863  | 1,37E-05 |
| 1818 | DB00226 | 0 | 0,9999864  | 1,36E-05 |
| 1819 | DB13216 | 0 | 0,9999865  | 1,35E-05 |
| 1820 | DB00679 | 0 | 0,99998665 | 1,34E-05 |
| 1821 | DB00333 | 0 | 0,9999871  | 1,29E-05 |
| 1822 | DB00696 | 0 | 0,99998736 | 1,26E-05 |
| 1823 | DB14105 | 0 | 0,9999875  | 1,25E-05 |
| 1824 | DB01051 | 0 | 0,9999877  | 1,23E-05 |
| 1825 | DB01110 | 0 | 0,99998784 | 1,21E-05 |
| 1826 | DB00732 | 0 | 0,99998796 | 1,21E-05 |
| 1827 | DB01263 | 0 | 0,99998844 | 1,16E-05 |
| 1828 | DB11073 | 0 | 0,9999887  | 1,14E-05 |
| 1829 | DB01601 | 0 | 0,9999888  | 1,12E-05 |
| 1830 | DB11995 | 0 | 0,9999888  | 1,12E-05 |
| 1831 | DB04657 | 0 | 0,9999889  | 1,11E-05 |
| 1832 | DB01088 | 0 | 0,9999889  | 1,11E-05 |
| 1833 | DB00288 | 0 | 0,9999889  | 1,11E-05 |
| 1834 | DB04572 | 0 | 0,9999889  | 1,11E-05 |
| 1835 | DB04844 | 0 | 0,99998903 | 1,09E-05 |

|      |         |   |            |          |
|------|---------|---|------------|----------|
| 1836 | DR00646 | 0 | 0,99998915 | 1,09E-05 |
| 1837 | DR00114 | 0 | 0,9999895  | 1,05E-05 |
| 1838 | DR14554 | 0 | 0,9999895  | 1,04E-05 |
| 1839 | DR01098 | 0 | 0,99998975 | 1,02E-05 |
| 1840 | DR01288 | 0 | 0,99998975 | 1,02E-05 |
| 1841 | DR01551 | 0 | 0,99998987 | 1,02E-05 |
| 1842 | DR00204 | 0 | 0,99998987 | 1,02E-05 |
| 1843 | DR00571 | 0 | 0,9999901  | 9,95E-06 |
| 1844 | DR04948 | 0 | 0,9999901  | 9,93E-06 |
| 1845 | DR04398 | 0 | 0,9999902  | 9,75E-06 |
| 1846 | DR13218 | 0 | 0,99999034 | 9,67E-06 |
| 1847 | DR01367 | 0 | 0,99999046 | 9,49E-06 |
| 1848 | DR00744 | 0 | 0,9999906  | 9,40E-06 |
| 1849 | DR11155 | 0 | 0,9999906  | 9,38E-06 |
| 1850 | DR12877 | 0 | 0,9999907  | 9,34E-06 |
| 1851 | DR09495 | 0 | 0,9999907  | 9,34E-06 |
| 1852 | DR00509 | 0 | 0,9999908  | 9,19E-06 |
| 1853 | DR01116 | 0 | 0,9999908  | 9,15E-06 |
| 1854 | DR13166 | 0 | 0,9999908  | 9,13E-06 |
| 1855 | DR00215 | 0 | 0,99999094 | 9,07E-06 |
| 1856 | DR08966 | 0 | 0,99999094 | 9,00E-06 |
| 1857 | DR09292 | 0 | 0,9999912  | 8,77E-06 |
| 1858 | DR01147 | 0 | 0,9999913  | 8,75E-06 |
| 1859 | DR11085 | 0 | 0,99999154 | 8,44E-06 |
| 1860 | DR00215 | 0 | 0,99999154 | 8,42E-06 |
| 1861 | DR00649 | 0 | 0,9999918  | 8,21E-06 |
| 1862 | DR14182 | 0 | 0,9999919  | 8,12E-06 |
| 1863 | DR00257 | 0 | 0,999992   | 8,01E-06 |
| 1864 | DR00091 | 0 | 0,99999213 | 7,90E-06 |
| 1865 | DR14020 | 0 | 0,99999213 | 7,87E-06 |
| 1866 | DR01022 | 0 | 0,99999225 | 7,80E-06 |
| 1867 | DR00754 | 0 | 0,9999924  | 7,64E-06 |
| 1868 | DR01212 | 0 | 0,9999925  | 7,56E-06 |
| 1869 | DR00818 | 0 | 0,9999925  | 7,55E-06 |
| 1870 | DR09081 | 0 | 0,9999925  | 7,54E-06 |
| 1871 | DR01332 | 0 | 0,9999925  | 7,50E-06 |
| 1872 | DR00876 | 0 | 0,9999925  | 7,50E-06 |
| 1873 | DR09480 | 0 | 0,9999926  | 7,38E-06 |
| 1874 | DR01121 | 0 | 0,99999297 | 7,02E-06 |
| 1875 | DR14212 | 0 | 0,9999931  | 6,92E-06 |
| 1876 | DR06480 | 0 | 0,9999932  | 6,77E-06 |
| 1877 | DR09346 | 0 | 0,9999933  | 6,69E-06 |
| 1878 | DR08987 | 0 | 0,9999933  | 6,64E-06 |
| 1879 | DR11642 | 0 | 0,99999344 | 6,52E-06 |
| 1880 | DR09029 | 0 | 0,99999356 | 6,40E-06 |
| 1881 | DR00379 | 0 | 0,9999937  | 6,33E-06 |
| 1882 | DR01041 | 0 | 0,9999939  | 6,09E-06 |
| 1883 | DR11340 | 0 | 0,9999939  | 6,05E-06 |
| 1884 | DR13246 | 0 | 0,99999404 | 5,93E-06 |
| 1885 | DR00559 | 0 | 0,99999404 | 5,90E-06 |
| 1886 | DR00439 | 0 | 0,99999416 | 5,89E-06 |
| 1887 | DR01619 | 0 | 0,99999416 | 5,80E-06 |
| 1888 | DR00627 | 0 | 0,9999943  | 5,70E-06 |
| 1889 | DR01253 | 0 | 0,9999943  | 5,67E-06 |
| 1890 | DR09118 | 0 | 0,9999945  | 5,52E-06 |
| 1891 | DR01340 | 0 | 0,9999945  | 5,45E-06 |
| 1892 | DR06775 | 0 | 0,99999464 | 5,38E-06 |
| 1893 | DR09421 | 0 | 0,99999464 | 5,32E-06 |
| 1894 | DR00643 | 0 | 0,99999475 | 5,30E-06 |
| 1895 | DR01607 | 0 | 0,99999475 | 5,27E-06 |
| 1896 | DR00337 | 0 | 0,99999475 | 5,19E-06 |
| 1897 | DR00430 | 0 | 0,9999949  | 5,17E-06 |
| 1898 | DR12362 | 0 | 0,9999949  | 5,14E-06 |
| 1899 | DR00857 | 0 | 0,9999949  | 5,14E-06 |
| 1900 | DR00411 | 0 | 0,9999949  | 5,13E-06 |
| 1901 | DR14184 | 0 | 0,9999949  | 5,13E-06 |
| 1902 | DR00805 | 0 | 0,999995   | 5,02E-06 |
| 1903 | DR06772 | 0 | 0,9999951  | 4,94E-06 |
| 1904 | DR00939 | 0 | 0,9999951  | 4,94E-06 |
| 1905 | DR06711 | 0 | 0,9999951  | 4,93E-06 |
| 1906 | DR00543 | 0 | 0,9999951  | 4,91E-06 |
| 1907 | DR00203 | 0 | 0,9999951  | 4,83E-06 |
| 1908 | DR00535 | 0 | 0,99999535 | 4,63E-06 |
| 1909 | DR11326 | 0 | 0,99999547 | 4,48E-06 |
| 1910 | DR09873 | 0 | 0,9999956  | 4,44E-06 |
| 1911 | DR08893 | 0 | 0,9999957  | 4,34E-06 |
| 1912 | DR14219 | 0 | 0,9999958  | 4,15E-06 |
| 1913 | DR00943 | 0 | 0,99999595 | 4,08E-06 |
| 1914 | DR00997 | 0 | 0,99999595 | 4,01E-06 |
| 1915 | DR08797 | 0 | 0,99999595 | 4,00E-06 |
| 1916 | DR11283 | 0 | 0,99999607 | 3,94E-06 |
| 1917 | DR13970 | 0 | 0,99999607 | 3,93E-06 |
| 1918 | DR06821 | 0 | 0,99999607 | 3,91E-06 |
| 1919 | DR00649 | 0 | 0,99999607 | 3,89E-06 |
| 1920 | DR00385 | 0 | 0,9999962  | 3,82E-06 |
| 1921 | DR00564 | 0 | 0,9999963  | 3,66E-06 |
| 1922 | DR06708 | 0 | 0,9999963  | 3,64E-06 |
| 1923 | DR01403 | 0 | 0,99999654 | 3,46E-06 |
| 1924 | DR14642 | 0 | 0,99999666 | 3,37E-06 |
| 1925 | DR14575 | 0 | 0,99999666 | 3,32E-06 |
| 1926 | DR11117 | 0 | 0,9999968  | 3,23E-06 |
| 1927 | DR13931 | 0 | 0,9999968  | 3,21E-06 |
| 1928 | DR11662 | 0 | 0,9999968  | 3,20E-06 |
| 1929 | DR00118 | 0 | 0,9999968  | 3,19E-06 |
| 1930 | DR01248 | 0 | 0,9999969  | 3,13E-06 |
| 1931 | DR15305 | 0 | 0,9999969  | 3,11E-06 |
| 1932 | DR00848 | 0 | 0,9999969  | 3,07E-06 |
| 1933 | DR08809 | 0 | 0,9999969  | 3,05E-06 |
| 1934 | DR00486 | 0 | 0,9999969  | 3,05E-06 |
| 1935 | DR08826 | 0 | 0,999997   | 3,01E-06 |
| 1936 | DR13170 | 0 | 0,999997   | 3,01E-06 |
| 1937 | DR12401 | 0 | 0,999997   | 2,97E-06 |
| 1938 | DR00936 | 0 | 0,999997   | 2,97E-06 |
| 1939 | DR00811 | 0 | 0,999997   | 2,93E-06 |
| 1940 | DR13781 | 0 | 0,99999714 | 2,89E-06 |
| 1941 | DR13273 | 0 | 0,99999726 | 2,80E-06 |
| 1942 | DR00843 | 0 | 0,99999726 | 2,79E-06 |
| 1943 | DR03147 | 0 | 0,99999726 | 2,77E-06 |
| 1944 | DR11748 | 0 | 0,99999726 | 2,70E-06 |
| 1945 | DR14109 | 0 | 0,9999975  | 2,52E-06 |
| 1946 | DR00271 | 0 | 0,9999975  | 2,51E-06 |
| 1947 | DR11156 | 0 | 0,9999975  | 2,46E-06 |
| 1948 | DR00138 | 0 | 0,9999976  | 2,40E-06 |
| 1949 | DR00288 | 0 | 0,9999976  | 2,38E-06 |
| 1950 | DR09319 | 0 | 0,9999976  | 2,38E-06 |
| 1951 | DR08814 | 0 | 0,99999774 | 2,31E-06 |
| 1952 | DR00416 | 0 | 0,99999774 | 2,28E-06 |
| 1953 | DR13225 | 0 | 0,99999774 | 2,24E-06 |
| 1954 | DR00672 | 0 | 0,99999774 | 2,21E-06 |
| 1955 | DR08911 | 0 | 0,999998   | 1,99E-06 |
| 1956 | DR00881 | 0 | 0,9999981  | 1,96E-06 |
| 1957 | DR06148 | 0 | 0,9999981  | 1,89E-06 |
| 1958 | DR00214 | 0 | 0,9999982  | 1,83E-06 |
| 1959 | DR00752 | 0 | 0,9999982  | 1,82E-06 |
| 1960 | DR00465 | 0 | 0,9999982  | 1,78E-06 |
| 1961 | DR00865 | 0 | 0,9999982  | 1,73E-06 |
| 1962 | DR01346 | 0 | 0,99999833 | 1,71E-06 |
| 1963 | DR04834 | 0 | 0,99999833 | 1,70E-06 |
| 1964 | DR01588 | 0 | 0,99999833 | 1,70E-06 |
| 1965 | DR13981 | 0 | 0,99999833 | 1,70E-06 |
| 1966 | DR00445 | 0 | 0,99999833 | 1,69E-06 |
| 1967 | DR00619 | 0 | 0,99999833 | 1,68E-06 |
| 1968 | DR04842 | 0 | 0,99999833 | 1,63E-06 |
| 1969 | DR00246 | 0 | 0,99999833 | 1,63E-06 |
| 1970 | DR00855 | 0 | 0,99999833 | 1,63E-06 |

|      |          |   |            |          |
|------|----------|---|------------|----------|
| 1971 | DR00813  | 0 | 0,99999845 | 1,60E-06 |
| 1972 | DB11181  | 0 | 0,99999845 | 1,59E-06 |
| 1973 | DB01718  | 0 | 0,99999845 | 1,57E-06 |
| 1974 | DR00930  | 0 | 0,99999845 | 1,52E-06 |
| 1975 | DR00481  | 0 | 0,99999857 | 1,48E-06 |
| 1976 | DR00218  | 0 | 0,99999857 | 1,43E-06 |
| 1977 | DR00262  | 0 | 0,99999857 | 1,41E-06 |
| 1978 | DR00856  | 0 | 0,99999857 | 1,40E-06 |
| 1979 | DR00673  | 0 | 0,9999987  | 1,37E-06 |
| 1980 | DR00450  | 0 | 0,9999987  | 1,29E-06 |
| 1981 | DR00262  | 0 | 0,9999987  | 1,27E-06 |
| 1982 | DR00907  | 0 | 0,9999987  | 1,25E-06 |
| 1983 | DB01426  | 0 | 0,9999988  | 1,25E-06 |
| 1984 | DR00993  | 0 | 0,9999988  | 1,24E-06 |
| 1985 | DR00202  | 0 | 0,9999988  | 1,21E-06 |
| 1986 | DR00448  | 0 | 0,9999988  | 1,20E-06 |
| 1987 | DB01024  | 0 | 0,9999988  | 1,16E-06 |
| 1988 | DB01175  | 0 | 0,9999988  | 1,14E-06 |
| 1989 | DB01254  | 0 | 0,9999989  | 1,09E-06 |
| 1990 | DR00762  | 0 | 0,9999989  | 1,09E-06 |
| 1991 | DR00663  | 0 | 0,9999989  | 1,09E-06 |
| 1992 | DR00141  | 0 | 0,9999989  | 1,05E-06 |
| 1993 | DB01021  | 0 | 0,9999989  | 1,04E-06 |
| 1994 | DR00355  | 0 | 0,9999989  | 1,03E-06 |
| 1995 | DR00455  | 0 | 0,9999989  | 1,03E-06 |
| 1996 | DB01081  | 0 | 0,9999989  | 1,03E-06 |
| 1997 | DR00895  | 0 | 0,9999989  | 1,01E-06 |
| 1998 | DB01184  | 0 | 0,99999905 | 1,01E-06 |
| 1999 | DB01131  | 0 | 0,99999905 | 1,01E-06 |
| 2000 | DR00150  | 0 | 0,99999905 | 1,00E-06 |
| 2001 | DR00891  | 0 | 0,99999905 | 1,00E-06 |
| 2002 | DR00631  | 0 | 0,99999905 | 9,79E-07 |
| 2003 | DR00345  | 0 | 0,99999905 | 9,77E-07 |
| 2004 | DR00572  | 0 | 0,99999905 | 9,74E-07 |
| 2005 | DR00245  | 0 | 0,99999905 | 9,49E-07 |
| 2006 | DB14195  | 0 | 0,99999905 | 9,34E-07 |
| 2007 | DB12867  | 0 | 0,99999905 | 9,12E-07 |
| 2008 | DB00118  | 0 | 0,99999917 | 8,80E-07 |
| 2009 | DB13063  | 0 | 0,99999917 | 8,65E-07 |
| 2010 | DR00725  | 0 | 0,99999917 | 8,63E-07 |
| 2011 | DR00871  | 0 | 0,99999917 | 8,56E-07 |
| 2012 | DR00796  | 0 | 0,99999917 | 8,38E-07 |
| 2013 | DB01048  | 0 | 0,99999917 | 8,37E-07 |
| 2014 | DR00153  | 0 | 0,99999917 | 8,13E-07 |
| 2015 | DR00895  | 0 | 0,99999917 | 7,90E-07 |
| 2016 | DR00552  | 0 | 0,99999917 | 7,77E-07 |
| 2017 | DR00162  | 0 | 0,9999993  | 7,70E-07 |
| 2018 | DB01437  | 0 | 0,9999993  | 7,51E-07 |
| 2019 | DR00133  | 0 | 0,9999993  | 7,47E-07 |
| 2020 | DB01401  | 0 | 0,9999993  | 7,46E-07 |
| 2021 | DR00144  | 0 | 0,9999993  | 7,39E-07 |
| 2022 | DB11064  | 0 | 0,9999993  | 7,30E-07 |
| 2023 | DR00910  | 0 | 0,9999993  | 7,25E-07 |
| 2024 | DR00728  | 0 | 0,9999993  | 7,15E-07 |
| 2025 | DR00120  | 0 | 0,9999993  | 7,03E-07 |
| 2026 | DR00784  | 0 | 0,9999993  | 6,94E-07 |
| 2027 | DR00793  | 0 | 0,9999993  | 6,74E-07 |
| 2028 | DR00410  | 0 | 0,9999993  | 6,62E-07 |
| 2029 | DR00960  | 0 | 0,9999994  | 6,50E-07 |
| 2030 | DR00447  | 0 | 0,9999994  | 6,47E-07 |
| 2031 | DR00306  | 0 | 0,9999994  | 6,46E-07 |
| 2032 | DR00242  | 0 | 0,9999994  | 6,25E-07 |
| 2033 | DB01396  | 0 | 0,9999994  | 6,19E-07 |
| 2034 | DR00701  | 0 | 0,9999994  | 5,99E-07 |
| 2035 | DB11577  | 0 | 0,9999994  | 5,70E-07 |
| 2036 | DR00511  | 0 | 0,9999994  | 5,66E-07 |
| 2037 | DB01039  | 0 | 0,9999994  | 5,63E-07 |
| 2038 | DR00374  | 0 | 0,9999994  | 5,58E-07 |
| 2039 | DR00428  | 0 | 0,9999994  | 5,58E-07 |
| 2040 | DR00912  | 0 | 0,9999995  | 5,29E-07 |
| 2041 | DR00980  | 0 | 0,9999995  | 5,06E-07 |
| 2042 | DB01192  | 0 | 0,9999995  | 4,99E-07 |
| 2043 | DB13278  | 0 | 0,9999995  | 4,88E-07 |
| 2044 | DB01427  | 0 | 0,9999995  | 4,83E-07 |
| 2045 | DR00715  | 0 | 0,9999995  | 4,70E-07 |
| 2046 | DR00979  | 0 | 0,9999995  | 4,54E-07 |
| 2047 | DR00243  | 0 | 0,9999995  | 4,39E-07 |
| 2048 | DR00706  | 0 | 0,9999995  | 4,36E-07 |
| 2049 | DR00307  | 0 | 0,9999995  | 4,32E-07 |
| 2050 | DR00928  | 0 | 0,99999964 | 4,09E-07 |
| 2051 | DB13282  | 0 | 0,99999964 | 3,68E-07 |
| 2052 | DR00555  | 0 | 0,99999964 | 3,67E-07 |
| 2053 | DR04221  | 0 | 0,99999964 | 3,67E-07 |
| 2054 | DB13520  | 0 | 0,99999964 | 3,60E-07 |
| 2055 | DR00304  | 0 | 0,99999964 | 3,65E-07 |
| 2056 | DR00759  | 0 | 0,99999964 | 3,50E-07 |
| 2057 | DB01577  | 0 | 0,99999964 | 3,33E-07 |
| 2058 | DR00362  | 0 | 0,99999964 | 3,32E-07 |
| 2059 | DR006201 | 0 | 0,99999964 | 3,31E-07 |
| 2060 | DB01579  | 0 | 0,99999964 | 3,17E-07 |
| 2061 | DB14156  | 0 | 0,99999964 | 3,17E-07 |
| 2062 | DR00296  | 0 | 0,99999964 | 3,17E-07 |
| 2063 | DR00921  | 0 | 0,99999964 | 3,11E-07 |
| 2064 | DB13211  | 0 | 0,99999964 | 3,10E-07 |
| 2065 | DR04930  | 0 | 0,99999964 | 3,04E-07 |
| 2066 | DR00440  | 0 | 0,99999976 | 2,96E-07 |
| 2067 | DR00590  | 0 | 0,99999976 | 2,89E-07 |
| 2068 | DR04575  | 0 | 0,99999976 | 2,89E-07 |
| 2069 | DB01428  | 0 | 0,99999976 | 2,71E-07 |
| 2070 | DR00415  | 0 | 0,99999976 | 2,71E-07 |
| 2071 | DB01061  | 0 | 0,99999976 | 2,60E-07 |
| 2072 | DR00552  | 0 | 0,99999976 | 2,59E-07 |
| 2073 | DB01214  | 0 | 0,99999976 | 2,53E-07 |
| 2074 | DR00185  | 0 | 0,99999976 | 2,53E-07 |
| 2075 | DR00571  | 0 | 0,99999976 | 2,57E-07 |
| 2076 | DR00327  | 0 | 0,99999976 | 2,56E-07 |
| 2077 | DB11653  | 0 | 0,99999976 | 2,55E-07 |
| 2078 | DR00521  | 0 | 0,99999976 | 2,53E-07 |
| 2079 | DB11577  | 0 | 0,99999976 | 2,47E-07 |
| 2080 | DB12130  | 0 | 0,99999976 | 2,40E-07 |
| 2081 | DR00908  | 0 | 0,99999976 | 2,38E-07 |
| 2082 | DR00891  | 0 | 0,99999976 | 2,36E-07 |
| 2083 | DB13532  | 0 | 0,99999976 | 2,34E-07 |
| 2084 | DR00637  | 0 | 0,99999976 | 2,32E-07 |
| 2085 | DB01079  | 0 | 0,99999976 | 2,31E-07 |
| 2086 | DB01011  | 0 | 0,99999976 | 2,25E-07 |
| 2087 | DR00568  | 0 | 0,99999976 | 2,23E-07 |
| 2088 | DB11652  | 0 | 0,99999976 | 2,17E-07 |
| 2089 | DB11115  | 0 | 0,99999976 | 2,12E-07 |
| 2090 | DB12537  | 0 | 0,99999976 | 2,09E-07 |
| 2091 | DR00295  | 0 | 0,99999976 | 2,08E-07 |
| 2092 | DR00845  | 0 | 0,99999976 | 2,06E-07 |
| 2093 | DB11817  | 0 | 0,99999976 | 1,90E-07 |
| 2094 | DB01188  | 0 | 0,99999976 | 1,88E-07 |
| 2095 | DR02325  | 0 | 0,99999976 | 1,88E-07 |
| 2096 | DR00347  | 0 | 0,99999976 | 1,87E-07 |
| 2097 | DR00901  | 0 | 0,99999976 | 1,87E-07 |
| 2098 | DR00694  | 0 | 0,99999976 | 1,84E-07 |
| 2099 | DR02925  | 0 | 0,9999999  | 1,76E-07 |
| 2100 | DB11221  | 0 | 0,9999999  | 1,70E-07 |
| 2101 | DR00636  | 0 | 0,9999999  | 1,68E-07 |
| 2102 | DR00771  | 0 | 0,9999999  | 1,65E-07 |
| 2103 | DR00634  | 0 | 0,9999999  | 1,64E-07 |
| 2104 | DB14482  | 0 | 0,9999999  | 1,64E-07 |
| 2105 | DB01136  | 0 | 0,9999999  | 1,64E-07 |



|      |         |   |           |          |
|------|---------|---|-----------|----------|
| 2106 | DB01177 | 0 | 0.9999999 | 1.57E-07 |
| 2107 | DB00915 | 0 | 0.9999999 | 1.50E-07 |
| 2108 | DB14002 | 0 | 0.9999999 | 1.44E-07 |
| 2109 | DB01118 | 0 | 0.9999999 | 1.43E-07 |
| 2110 | DB01416 | 0 | 0.9999999 | 1.42E-07 |
| 2111 | DB01394 | 0 | 0.9999999 | 1.41E-07 |
| 2112 | DB08931 | 0 | 0.9999999 | 1.40E-07 |
| 2113 | DB01213 | 0 | 0.9999999 | 1.38E-07 |
| 2114 | DB13851 | 0 | 0.9999999 | 1.35E-07 |
| 2115 | DB13262 | 0 | 0.9999999 | 1.27E-07 |
| 2116 | DB00625 | 0 | 0.9999999 | 1.22E-07 |
| 2117 | DB00827 | 0 | 0.9999999 | 1.18E-07 |
| 2118 | DB01017 | 0 | 0.9999999 | 1.12E-07 |
| 2119 | DB00626 | 0 | 0.9999999 | 1.10E-07 |
| 2120 | DB00964 | 0 | 0.9999999 | 1.08E-07 |
| 2121 | DB00826 | 0 | 0.9999999 | 1.08E-07 |
| 2122 | DB09343 | 0 | 0.9999999 | 1.07E-07 |
| 2123 | DB11613 | 0 | 0.9999999 | 1.06E-07 |
| 2124 | DB11853 | 0 | 0.9999999 | 1.03E-07 |
| 2125 | DB09053 | 0 | 0.9999999 | 9.81E-08 |
| 2126 | DB11184 | 0 | 0.9999999 | 9.77E-08 |
| 2127 | DB01329 | 0 | 0.9999999 | 9.75E-08 |
| 2128 | DB04571 | 0 | 0.9999999 | 9.71E-08 |
| 2129 | DB00390 | 0 | 0.9999999 | 9.30E-08 |
| 2130 | DB14185 | 0 | 0.9999999 | 9.29E-08 |
| 2131 | DB12313 | 0 | 0.9999999 | 9.00E-08 |
| 2132 | DB11336 | 0 | 0.9999999 | 8.90E-08 |
| 2133 | DB14632 | 0 | 0.9999999 | 8.80E-08 |
| 2134 | DB00662 | 0 | 0.9999999 | 8.69E-08 |
| 2135 | DB00833 | 0 | 0.9999999 | 8.65E-08 |
| 2136 | DB08815 | 0 | 0.9999999 | 8.54E-08 |
| 2137 | DB14086 | 0 | 0.9999999 | 8.47E-08 |
| 2138 | DB01609 | 0 | 0.9999999 | 8.45E-08 |
| 2139 | DB00565 | 0 | 0.9999999 | 8.05E-08 |
| 2140 | DB00925 | 0 | 0.9999999 | 8.02E-08 |
| 2141 | DB01616 | 0 | 0.9999999 | 7.71E-08 |
| 2142 | DB14485 | 0 | 0.9999999 | 7.38E-08 |
| 2143 | DB01238 | 0 | 0.9999999 | 7.18E-08 |
| 2144 | DB04868 | 0 | 0.9999999 | 6.97E-08 |
| 2145 | DB00698 | 0 | 0.9999999 | 6.69E-08 |
| 2146 | DB11700 | 0 | 0.9999999 | 6.64E-08 |
| 2147 | DB11703 | 0 | 0.9999999 | 6.54E-08 |
| 2148 | DB09099 | 0 | 0.9999999 | 6.32E-08 |
| 2149 | DB09083 | 0 | 0.9999999 | 6.20E-08 |
| 2150 | DB01113 | 0 | 0.9999999 | 6.21E-08 |
| 2151 | DB04825 | 0 | 0.9999999 | 6.16E-08 |
| 2152 | DB00768 | 0 | 0.9999999 | 6.11E-08 |
| 2153 | DB06292 | 0 | 0.9999999 | 6.07E-08 |
| 2154 | DB04951 | 0 | 0.9999999 | 5.97E-08 |
| 2155 | DB01604 | 0 | 1         | 5.78E-08 |
| 2156 | DB03793 | 0 | 1         | 5.74E-08 |
| 2157 | DB11581 | 0 | 1         | 5.67E-08 |
| 2158 | DB01436 | 0 | 1         | 5.62E-08 |
| 2159 | DB06337 | 0 | 1         | 5.57E-08 |
| 2160 | DB01250 | 0 | 1         | 5.37E-08 |
| 2161 | DB01267 | 0 | 1         | 5.51E-08 |
| 2162 | DB14483 | 0 | 1         | 5.48E-08 |
| 2163 | DB06700 | 0 | 1         | 5.37E-08 |
| 2164 | DB12127 | 0 | 1         | 5.34E-08 |
| 2165 | DB11730 | 0 | 1         | 5.02E-08 |
| 2166 | DB11751 | 0 | 1         | 5.01E-08 |
| 2167 | DB00192 | 0 | 1         | 4.91E-08 |
| 2168 | DB09086 | 0 | 1         | 4.73E-08 |
| 2169 | DB00685 | 0 | 1         | 4.69E-08 |
| 2170 | DB15982 | 0 | 1         | 4.53E-08 |
| 2171 | DB00987 | 0 | 1         | 4.37E-08 |
| 2172 | DB01337 | 0 | 1         | 4.33E-08 |
| 2173 | DB06152 | 0 | 1         | 4.25E-08 |
| 2174 | DB06608 | 0 | 1         | 4.12E-08 |
| 2175 | DB00275 | 0 | 1         | 4.12E-08 |
| 2176 | DB00424 | 0 | 1         | 4.04E-08 |
| 2177 | DB00889 | 0 | 1         | 4.03E-08 |
| 2178 | DB13878 | 0 | 1         | 4.01E-08 |
| 2179 | DB15694 | 0 | 1         | 3.99E-08 |
| 2180 | DB09050 | 0 | 1         | 3.92E-08 |
| 2181 | DB14489 | 0 | 1         | 3.91E-08 |
| 2182 | DB00332 | 0 | 1         | 3.90E-08 |
| 2183 | DB00451 | 0 | 1         | 3.87E-08 |
| 2184 | DB01150 | 0 | 1         | 3.69E-08 |
| 2185 | DB06217 | 0 | 1         | 3.48E-08 |
| 2186 | DB09027 | 0 | 1         | 3.44E-08 |
| 2187 | DB06290 | 0 | 1         | 3.32E-08 |
| 2188 | DB00834 | 0 | 1         | 3.26E-08 |
| 2189 | DB01503 | 0 | 1         | 3.14E-08 |
| 2190 | DB00256 | 0 | 1         | 3.14E-08 |
| 2191 | DB11262 | 0 | 1         | 2.83E-08 |
| 2192 | DB00695 | 0 | 1         | 2.61E-08 |
| 2193 | DB00376 | 0 | 1         | 2.57E-08 |
| 2194 | DB14183 | 0 | 1         | 2.55E-08 |
| 2195 | DB00699 | 0 | 1         | 2.46E-08 |
| 2196 | DB00691 | 0 | 1         | 2.43E-08 |
| 2197 | DB11157 | 0 | 1         | 2.40E-08 |
| 2198 | DB12483 | 0 | 1         | 2.37E-08 |
| 2199 | DB11651 | 0 | 1         | 2.20E-08 |
| 2200 | DB01010 | 0 | 1         | 2.20E-08 |
| 2201 | DB12954 | 0 | 1         | 2.10E-08 |
| 2202 | DB06814 | 0 | 1         | 2.07E-08 |
| 2203 | DB00952 | 0 | 1         | 2.02E-08 |
| 2204 | DB00615 | 0 | 1         | 1.90E-08 |
| 2205 | DB06249 | 0 | 1         | 1.90E-08 |
| 2206 | DB13125 | 0 | 1         | 1.84E-08 |
| 2207 | DB09342 | 0 | 1         | 1.83E-08 |
| 2208 | DB14143 | 0 | 1         | 1.83E-08 |
| 2209 | DB08817 | 0 | 1         | 1.80E-08 |
| 2210 | DB00731 | 0 | 1         | 1.73E-08 |
| 2211 | DB14104 | 0 | 1         | 1.49E-08 |
| 2212 | DB09401 | 0 | 1         | 1.37E-08 |
| 2213 | DB15594 | 0 | 1         | 1.36E-08 |
| 2214 | DB00353 | 0 | 1         | 1.35E-08 |
| 2215 | DB12020 | 0 | 1         | 1.35E-08 |
| 2216 | DB11263 | 0 | 1         | 1.35E-08 |
| 2217 | DB13928 | 0 | 1         | 1.34E-08 |
| 2218 | DB01140 | 0 | 1         | 1.31E-08 |
| 2219 | DB01301 | 0 | 1         | 1.29E-08 |
| 2220 | DB12523 | 0 | 1         | 1.29E-08 |
| 2221 | DB00589 | 0 | 1         | 1.28E-08 |
| 2222 | DB01597 | 0 | 1         | 1.28E-08 |
| 2223 | DB09348 | 0 | 1         | 1.27E-08 |
| 2224 | DB00771 | 0 | 1         | 1.25E-08 |
| 2225 | DB09114 | 0 | 1         | 1.13E-08 |
| 2226 | DB09382 | 0 | 1         | 1.10E-08 |
| 2227 | DB01148 | 0 | 1         | 1.07E-08 |
| 2228 | DB11827 | 0 | 1         | 1.03E-08 |
| 2229 | DB01141 | 0 | 1         | 9.92E-09 |
| 2230 | DB00500 | 0 | 1         | 9.47E-09 |
| 2231 | DB00165 | 0 | 1         | 8.93E-09 |
| 2232 | DB04703 | 0 | 1         | 8.64E-09 |
| 2233 | DB00816 | 0 | 1         | 8.60E-09 |
| 2234 | DB06137 | 0 | 1         | 8.47E-09 |
| 2235 | DB13277 | 0 | 1         | 8.43E-09 |
| 2236 | DB12267 | 0 | 1         | 8.34E-09 |
| 2237 | DB11842 | 0 | 1         | 8.14E-09 |
| 2238 | DB12364 | 0 | 1         | 8.12E-09 |
| 2239 | DB13337 | 0 | 1         | 7.83E-09 |
| 2240 | DB00470 | 0 | 1         | 7.78E-09 |

|      |         |   |   |          |
|------|---------|---|---|----------|
| 2241 | DR00189 | 0 | 1 | 7.76E-09 |
| 2242 | DR00279 | 0 | 1 | 7.27E-09 |
| 2243 | DR08930 | 0 | 1 | 7.17E-09 |
| 2244 | DR00170 | 0 | 1 | 6.99E-09 |
| 2245 | DR01399 | 0 | 1 | 6.88E-09 |
| 2246 | DR01117 | 0 | 1 | 6.63E-09 |
| 2247 | DR11071 | 0 | 1 | 6.64E-09 |
| 2248 | DR02266 | 0 | 1 | 6.49E-09 |
| 2249 | DR00730 | 0 | 1 | 6.31E-09 |
| 2250 | DR00238 | 0 | 1 | 6.22E-09 |
| 2251 | DR13800 | 0 | 1 | 6.02E-09 |
| 2252 | DR14475 | 0 | 1 | 5.89E-09 |
| 2253 | DR01326 | 0 | 1 | 5.61E-09 |
| 2254 | DR00132 | 0 | 1 | 5.51E-09 |
| 2255 | DR01415 | 0 | 1 | 5.48E-09 |
| 2256 | DR00338 | 0 | 1 | 5.41E-09 |
| 2257 | DR00713 | 0 | 1 | 5.04E-09 |
| 2258 | DR00146 | 0 | 1 | 5.01E-09 |
| 2259 | DR09064 | 0 | 1 | 4.95E-09 |
| 2260 | DR09214 | 0 | 1 | 4.87E-09 |
| 2261 | DR00514 | 0 | 1 | 4.85E-09 |
| 2262 | DR11591 | 0 | 1 | 4.76E-09 |
| 2263 | DR13136 | 0 | 1 | 4.71E-09 |
| 2264 | DR00528 | 0 | 1 | 4.54E-09 |
| 2265 | DR01185 | 0 | 1 | 4.44E-09 |
| 2266 | DR09297 | 0 | 1 | 4.38E-09 |
| 2267 | DR11496 | 0 | 1 | 4.26E-09 |
| 2268 | DR00216 | 0 | 1 | 4.11E-09 |
| 2269 | DR11217 | 0 | 1 | 4.11E-09 |
| 2270 | DR00289 | 0 | 1 | 4.04E-09 |
| 2271 | DR01138 | 0 | 1 | 3.90E-09 |
| 2272 | DR05016 | 0 | 1 | 3.75E-09 |
| 2273 | DR13154 | 0 | 1 | 3.71E-09 |
| 2274 | DR04854 | 0 | 1 | 3.63E-09 |
| 2275 | DR00323 | 0 | 1 | 3.58E-09 |
| 2276 | DR00824 | 0 | 1 | 3.56E-09 |
| 2277 | DR01183 | 0 | 1 | 3.53E-09 |
| 2278 | DR01120 | 0 | 1 | 3.45E-09 |
| 2279 | DR04816 | 0 | 1 | 3.43E-09 |
| 2280 | DR00644 | 0 | 1 | 3.37E-09 |
| 2281 | DR00917 | 0 | 1 | 3.27E-09 |
| 2282 | DR00913 | 0 | 1 | 3.26E-09 |
| 2283 | DR12343 | 0 | 1 | 3.09E-09 |
| 2284 | DR00136 | 0 | 1 | 3.08E-09 |
| 2285 | DR00385 | 0 | 1 | 3.00E-09 |
| 2286 | DR00722 | 0 | 1 | 2.93E-09 |
| 2287 | DR15233 | 0 | 1 | 2.67E-09 |
| 2288 | DR14583 | 0 | 1 | 2.63E-09 |
| 2289 | DR00800 | 0 | 1 | 2.58E-09 |
| 2290 | DR11206 | 0 | 1 | 2.55E-09 |
| 2291 | DR00498 | 0 | 1 | 2.48E-09 |
| 2292 | DR08822 | 0 | 1 | 2.48E-09 |
| 2293 | DR14099 | 0 | 1 | 2.41E-09 |
| 2294 | DR00360 | 0 | 1 | 2.38E-09 |
| 2295 | DR11226 | 0 | 1 | 2.33E-09 |
| 2296 | DR14881 | 0 | 1 | 2.34E-09 |
| 2297 | DR06787 | 0 | 1 | 2.32E-09 |
| 2298 | DR12500 | 0 | 1 | 2.28E-09 |
| 2299 | DR04570 | 0 | 1 | 2.23E-09 |
| 2300 | DR00163 | 0 | 1 | 2.09E-09 |
| 2301 | DR08897 | 0 | 1 | 2.08E-09 |
| 2302 | DR14048 | 0 | 1 | 2.07E-09 |
| 2303 | DR11633 | 0 | 1 | 2.03E-09 |
| 2304 | DR00382 | 0 | 1 | 1.91E-09 |
| 2305 | DR14083 | 0 | 1 | 1.89E-09 |
| 2306 | DR00241 | 0 | 1 | 1.82E-09 |
| 2307 | DR13873 | 0 | 1 | 1.82E-09 |
| 2308 | DR00249 | 0 | 1 | 1.74E-09 |
| 2309 | DR11315 | 0 | 1 | 1.74E-09 |
| 2310 | DR01209 | 0 | 1 | 1.72E-09 |
| 2311 | DR08976 | 0 | 1 | 1.66E-09 |
| 2312 | DR14703 | 0 | 1 | 1.64E-09 |
| 2313 | DR04838 | 0 | 1 | 1.48E-09 |
| 2314 | DR09143 | 0 | 1 | 1.46E-09 |
| 2315 | DR00422 | 0 | 1 | 1.43E-09 |
| 2316 | DR08860 | 0 | 1 | 1.38E-09 |
| 2317 | DR11096 | 0 | 1 | 1.33E-09 |
| 2318 | DR14491 | 0 | 1 | 1.28E-09 |
| 2319 | DR00747 | 0 | 1 | 1.27E-09 |
| 2320 | DR00169 | 0 | 1 | 1.24E-09 |
| 2321 | DR00185 | 0 | 1 | 1.19E-09 |
| 2322 | DR14486 | 0 | 1 | 1.19E-09 |
| 2323 | DR00689 | 0 | 1 | 1.18E-09 |
| 2324 | DR04813 | 0 | 1 | 1.15E-09 |
| 2325 | DR00776 | 0 | 1 | 1.12E-09 |
| 2326 | DR00617 | 0 | 1 | 1.10E-09 |
| 2327 | DR09120 | 0 | 1 | 1.10E-09 |
| 2328 | DR06803 | 0 | 1 | 1.08E-09 |
| 2329 | DR06216 | 0 | 1 | 1.05E-09 |
| 2330 | DR00322 | 0 | 1 | 1.04E-09 |
| 2331 | DR00942 | 0 | 1 | 1.03E-09 |
| 2332 | DR04115 | 0 | 1 | 1.01E-09 |
| 2333 | DR14490 | 0 | 1 | 1.01E-09 |
| 2334 | DR00734 | 0 | 1 | 8.96E-10 |
| 2335 | DR01336 | 0 | 1 | 8.75E-10 |
| 2336 | DR06714 | 0 | 1 | 8.16E-10 |
| 2337 | DR00777 | 0 | 1 | 7.60E-10 |
| 2338 | DR00496 | 0 | 1 | 7.53E-10 |
| 2339 | DR01004 | 0 | 1 | 6.86E-10 |
| 2340 | DR00870 | 0 | 1 | 6.64E-10 |
| 2341 | DR14191 | 0 | 1 | 6.58E-10 |
| 2342 | DR00303 | 0 | 1 | 5.73E-10 |
| 2343 | DR01000 | 0 | 1 | 5.73E-10 |
| 2344 | DR01125 | 0 | 1 | 5.73E-10 |
| 2345 | DR13962 | 0 | 1 | 5.43E-10 |
| 2346 | DR13947 | 0 | 1 | 5.16E-10 |
| 2347 | DR11637 | 0 | 1 | 5.12E-10 |
| 2348 | DR01009 | 0 | 1 | 4.90E-10 |
| 2349 | DR06155 | 0 | 1 | 4.80E-10 |
| 2350 | DR00931 | 0 | 1 | 4.37E-10 |
| 2351 | DR13910 | 0 | 1 | 4.36E-10 |
| 2352 | DR12147 | 0 | 1 | 4.32E-10 |
| 2353 | DR00797 | 0 | 1 | 4.28E-10 |
| 2354 | DR11644 | 0 | 1 | 4.23E-10 |
| 2355 | DR09212 | 0 | 1 | 4.09E-10 |
| 2356 | DR01196 | 0 | 1 | 4.08E-10 |
| 2357 | DR00006 | 0 | 1 | 3.81E-10 |
| 2358 | DR01162 | 0 | 1 | 3.58E-10 |
| 2359 | DR00442 | 0 | 1 | 3.54E-10 |
| 2360 | DR00523 | 0 | 1 | 3.51E-10 |
| 2361 | DR00291 | 0 | 1 | 3.49E-10 |
| 2362 | DR00520 | 0 | 1 | 3.34E-10 |
| 2363 | DR00481 | 0 | 1 | 3.20E-10 |
| 2364 | DR00725 | 0 | 1 | 2.77E-10 |
| 2365 | DR11978 | 0 | 1 | 2.53E-10 |
| 2366 | DR01244 | 0 | 1 | 2.40E-10 |
| 2367 | DR00126 | 0 | 1 | 2.23E-10 |
| 2368 | DR11594 | 0 | 1 | 2.02E-10 |
| 2369 | DR12792 | 0 | 1 | 1.95E-10 |
| 2370 | DR00457 | 0 | 1 | 1.77E-10 |
| 2371 | DR11800 | 0 | 1 | 1.65E-10 |
| 2372 | DR00693 | 0 | 1 | 1.58E-10 |
| 2373 | DR11574 | 0 | 1 | 1.50E-10 |
| 2374 | DR06769 | 0 | 1 | 1.44E-10 |
| 2375 | DR14484 | 0 | 1 | 1.30E-10 |

|      |         |   |   |          |
|------|---------|---|---|----------|
| 2376 | DR06209 | 0 | 1 | 1.27E-10 |
| 2377 | DR00255 | 0 | 1 | 1.20E-10 |
| 2378 | DB11660 | 0 | 1 | 9.99E-11 |
| 2379 | DR00642 | 0 | 1 | 9.97E-11 |
| 2380 | DR00318 | 0 | 1 | 8.74E-11 |
| 2381 | DR00688 | 0 | 1 | 8.36E-11 |
| 2382 | DR01393 | 0 | 1 | 7.75E-11 |
| 2383 | DR01406 | 0 | 1 | 7.57E-11 |
| 2384 | DR00313 | 0 | 1 | 7.44E-11 |
| 2385 | DR09102 | 0 | 1 | 7.35E-11 |
| 2386 | DR01413 | 0 | 1 | 7.03E-11 |
| 2387 | DR01108 | 0 | 1 | 6.80E-11 |
| 2388 | DR09183 | 0 | 1 | 5.80E-11 |
| 2389 | DR00493 | 0 | 1 | 5.49E-11 |
| 2390 | DR01112 | 0 | 1 | 5.34E-11 |
| 2391 | DR14120 | 0 | 1 | 4.19E-11 |
| 2392 | DR13219 | 0 | 1 | 4.04E-11 |
| 2393 | DR01231 | 0 | 1 | 3.86E-11 |
| 2394 | DR01182 | 0 | 1 | 3.80E-11 |
| 2395 | DR11901 | 0 | 1 | 3.49E-11 |
| 2396 | DR08868 | 0 | 1 | 3.36E-11 |
| 2397 | DR01106 | 0 | 1 | 3.34E-11 |
| 2398 | DR09526 | 0 | 1 | 3.22E-11 |
| 2399 | DR04824 | 0 | 1 | 3.02E-11 |
| 2400 | DR00222 | 0 | 1 | 2.76E-11 |
| 2401 | DR11632 | 0 | 1 | 2.29E-11 |
| 2402 | DR09357 | 0 | 1 | 2.28E-11 |
| 2403 | DR11269 | 0 | 1 | 2.24E-11 |
| 2404 | DR09117 | 0 | 1 | 2.00E-11 |
| 2405 | DR11359 | 0 | 1 | 1.97E-11 |
| 2406 | DR00676 | 0 | 1 | 1.97E-11 |
| 2407 | DR09257 | 0 | 1 | 1.84E-11 |
| 2408 | DR09071 | 0 | 1 | 1.82E-11 |
| 2409 | DR00982 | 0 | 1 | 1.78E-11 |
| 2410 | DR05015 | 0 | 1 | 1.72E-11 |
| 2411 | DR14476 | 0 | 1 | 1.72E-11 |
| 2412 | DR01199 | 0 | 1 | 1.71E-11 |
| 2413 | DR01107 | 0 | 1 | 1.66E-11 |
| 2414 | DR11656 | 0 | 1 | 1.40E-11 |
| 2415 | DR08819 | 0 | 1 | 1.38E-11 |
| 2416 | DR01280 | 0 | 1 | 1.17E-11 |
| 2417 | DR00494 | 0 | 1 | 1.15E-11 |
| 2418 | DR01129 | 0 | 1 | 9.26E-12 |
| 2419 | DR00415 | 0 | 1 | 7.76E-12 |
| 2420 | DR09026 | 0 | 1 | 7.46E-12 |
| 2421 | DR11989 | 0 | 1 | 6.67E-12 |
| 2422 | DR01256 | 0 | 1 | 5.13E-12 |
| 2423 | DR04861 | 0 | 1 | 4.89E-12 |
| 2424 | DR01149 | 0 | 1 | 4.37E-12 |
| 2425 | DR04855 | 0 | 1 | 4.31E-12 |
| 2426 | DR05039 | 0 | 1 | 4.18E-12 |
| 2427 | DR00549 | 0 | 1 | 3.96E-12 |
| 2428 | DR01590 | 0 | 1 | 3.45E-12 |
| 2429 | DR01618 | 0 | 1 | 2.13E-12 |
| 2430 | DR06774 | 0 | 1 | 2.11E-12 |
| 2431 | DR00637 | 0 | 1 | 2.02E-12 |
| 2432 | DR02300 | 0 | 1 | 2.02E-12 |
| 2433 | DR00867 | 0 | 1 | 1.89E-12 |
| 2434 | DR14638 | 0 | 1 | 1.78E-12 |
| 2435 | DR00266 | 0 | 1 | 1.75E-12 |
| 2436 | DR00309 | 0 | 1 | 1.59E-12 |
| 2437 | DR08903 | 0 | 1 | 1.58E-12 |
| 2438 | DR09280 | 0 | 1 | 1.52E-12 |
| 2439 | DR01230 | 0 | 1 | 1.18E-12 |
| 2440 | DR08819 | 0 | 1 | 1.13E-12 |
| 2441 | DR01284 | 0 | 1 | 1.05E-12 |
| 2442 | DR09300 | 0 | 1 | 1.04E-12 |
| 2443 | DR06605 | 0 | 1 | 9.56E-13 |
| 2444 | DR00459 | 0 | 1 | 5.49E-13 |
| 2445 | DR00973 | 0 | 1 | 4.99E-13 |
| 2446 | DR01053 | 0 | 1 | 4.60E-13 |
| 2447 | DR01073 | 0 | 1 | 4.26E-13 |
| 2448 | DR00946 | 0 | 1 | 3.88E-13 |
| 2449 | DR14824 | 0 | 1 | 3.87E-13 |
| 2450 | DR00872 | 0 | 1 | 3.52E-13 |
| 2451 | DR00650 | 0 | 1 | 3.50E-13 |
| 2452 | DR06174 | 0 | 1 | 3.14E-13 |
| 2453 | DR15916 | 0 | 1 | 3.02E-13 |
| 2454 | DR01322 | 0 | 1 | 2.50E-13 |
| 2455 | DR00948 | 0 | 1 | 2.32E-13 |
| 2456 | DR06274 | 0 | 1 | 2.11E-13 |
| 2457 | DR03255 | 0 | 1 | 2.08E-13 |
| 2458 | DR01783 | 0 | 1 | 1.44E-13 |
| 2459 | DR00877 | 0 | 1 | 1.22E-13 |
| 2460 | DR01025 | 0 | 1 | 1.18E-13 |
| 2461 | DR00640 | 0 | 1 | 1.18E-13 |
| 2462 | DR11256 | 0 | 1 | 9.06E-14 |
| 2463 | DR06825 | 0 | 1 | 7.79E-14 |
| 2464 | DR09128 | 0 | 1 | 7.28E-14 |
| 2465 | DR01169 | 0 | 1 | 5.49E-14 |
| 2466 | DR00654 | 0 | 1 | 4.90E-14 |
| 2467 | DR01060 | 0 | 1 | 4.55E-14 |
| 2468 | DR01392 | 0 | 1 | 3.98E-14 |
| 2469 | DR00533 | 0 | 1 | 3.66E-14 |
| 2470 | DR06287 | 0 | 1 | 2.82E-14 |
| 2471 | DR00736 | 0 | 1 | 2.39E-14 |
| 2472 | DR00553 | 0 | 1 | 2.02E-14 |
| 2473 | DR00611 | 0 | 1 | 1.04E-14 |
| 2474 | DR06228 | 0 | 1 | 1.02E-14 |
| 2475 | DR12095 | 0 | 1 | 8.83E-15 |
| 2476 | DR11145 | 0 | 1 | 8.03E-15 |
| 2477 | DR08896 | 0 | 1 | 6.08E-15 |
| 2478 | DR09096 | 0 | 1 | 5.21E-15 |
| 2479 | DR11207 | 0 | 1 | 4.92E-15 |
| 2480 | DR12808 | 0 | 1 | 4.37E-15 |
| 2481 | DR13854 | 0 | 1 | 3.14E-15 |
| 2482 | DR00598 | 0 | 1 | 1.98E-15 |
| 2483 | DR00417 | 0 | 1 | 1.02E-15 |
| 2484 | DR00541 | 0 | 1 | 8.99E-16 |
| 2485 | DR01288 | 0 | 1 | 6.14E-16 |
| 2486 | DR00471 | 0 | 1 | 6.08E-16 |
| 2487 | DR00573 | 0 | 1 | 4.57E-16 |
| 2488 | DR09218 | 0 | 1 | 3.00E-16 |
| 2489 | DR11672 | 0 | 1 | 2.67E-16 |
| 2490 | DR03756 | 0 | 1 | 4.09E-17 |
| 2491 | DR11691 | 0 | 1 | 3.52E-17 |
| 2492 | DR06401 | 0 | 1 | 3.47E-17 |
| 2493 | DR00661 | 0 | 1 | 2.66E-17 |
| 2494 | DR00682 | 0 | 1 | 1.37E-17 |
| 2495 | DR00159 | 0 | 1 | 8.87E-18 |
| 2496 | DR09101 | 0 | 1 | 7.24E-18 |
| 2497 | DR00197 | 0 | 1 | 1.18E-18 |
| 2498 | DR00215 | 0 | 1 | 1.03E-18 |
| 2499 | DR08875 | 0 | 1 | 1.16E-19 |
| 2500 | DR09047 | 0 | 1 | 5.90E-20 |
