# Supplementary material for: Accurate prediction of molecular properties and drug targets using a self-supervised image representation learning framework
Source: Springer Nature journal article supplement (doi:10.1038/s42256-022-00557-6), 2022-11-17
Supplement: 42256_2022_557_MOESM18_ESM.pdf [file 42256_2022_557_MOESM18_ESM.pdf]

**Table S24:** Screening results of approved drugs in DrugBank. DrugID corresponds to the drug id in DrugBank. non-inhibitor\_probs represents the probability of non-SARS-CoV-2 inhibitors. inhibitor\_probs represents the probability of SARS-CoV-2 inhibitors. The experiment type, evidence source, evidence description, and link indicate evidence that drugs can treat COVID-19.

| No. | DrugID  | non-inhibitor_probs | inhibitor_probs | experiment type                                                                     | evidence source                                                                                                                                                                               | evidence description                                                                                                                                                                                                                                                                                               | link                                                                                                                                                                                                          |
|-----|---------|---------------------|-----------------|-------------------------------------------------------------------------------------|-----------------------------------------------------------------------------------------------------------------------------------------------------------------------------------------------|--------------------------------------------------------------------------------------------------------------------------------------------------------------------------------------------------------------------------------------------------------------------------------------------------------------------|---------------------------------------------------------------------------------------------------------------------------------------------------------------------------------------------------------------|
| 1   | DB00390 | 3.58E-07            | 0.9999964       | cell assay                                                                          | Common cardiac medications potentially inhibit ACE2 binding to the SARS-CoV-2 Spike, and block virus penetration and infectivity in human lung cells                                          | Quabain, digitoxin and digoxin competitively inhibit ACE2 binding to the SARS-CoV-2 Receptor Binding Domain (RBD), and block virus penetration and infectivity in human lung cells.                                                                                                                                | <a href="https://www.nature.com/articles/s41598-021-01690-9">https://www.nature.com/articles/s41598-021-01690-9</a>                                                                                           |
| 2   | DB01008 | 1.37E-05            | 0.9999863       | pharmacophore model based on crystal structure of SARS-CoV-2 NSP15 endoribonuclease | Potential SARS-CoV-2 Nonstructural Protein 15 Inhibitors: Repurposing FDA-approved Drugs                                                                                                      | Drug candidates (Busulfan) clustered by fingerprint similarity.                                                                                                                                                                                                                                                    | <a href="https://www.sciencedirect.com/science/article/pii/S104620232505505/JERF-2021-00032">https://www.sciencedirect.com/science/article/pii/S104620232505505/JERF-2021-00032</a>                           |
| 3   | DB00681 | 3.25E-05            | 0.9999746       | docking analysis                                                                    | Computational View toward the Inhibition of SARS-CoV-2 Spike Glycoprotein and the 3CL Protease                                                                                                | Ergotamine, amphotericin b, and vancomycin are most promising to block the interaction of the SARS-CoV-2 S-protein with human ACE-2.                                                                                                                                                                               | <a href="https://www.mdpi.com/2079-3197/8/2/53/htm">https://www.mdpi.com/2079-3197/8/2/53/htm</a>                                                                                                             |
| 4   | DB01078 | 5.73E-05            | 0.99994266      | docking analysis                                                                    | Molecular screening of glycyrrhizin-based inhibitors against ACE2 host receptor of SARS-CoV-2                                                                                                 | Deslanoside, digitoxin, and digoxin are strong binders of SARS-CoV-2 ACE-2 receptor.                                                                                                                                                                                                                               | <a href="https://link.springer.com/article/10.1007/s00894-021-04816-y">https://link.springer.com/article/10.1007/s00894-021-04816-y</a>                                                                       |
| 5   | DB11602 | 8.29E-05            | 0.99991703      |                                                                                     |                                                                                                                                                                                               |                                                                                                                                                                                                                                                                                                                    |                                                                                                                                                                                                               |
| 6   | DB00380 | 8.64E-05            | 0.9999136       |                                                                                     |                                                                                                                                                                                               |                                                                                                                                                                                                                                                                                                                    |                                                                                                                                                                                                               |
| 7   | DB09104 | 0.000102322         | 0.9998977       |                                                                                     |                                                                                                                                                                                               |                                                                                                                                                                                                                                                                                                                    |                                                                                                                                                                                                               |
| 8   | DB15822 | 0.000104403         | 0.9998956       |                                                                                     |                                                                                                                                                                                               |                                                                                                                                                                                                                                                                                                                    |                                                                                                                                                                                                               |
| 9   | DB00293 | 0.000106269         | 0.99989367      | docking analysis                                                                    | Drug repurposing for identification of potential spike inhibitors for SARS-CoV-2 using molecular docking and molecular dynamics simulations                                                   | Another docking study revealed that the drugs cytarabine, raltitrexed, tenofovir, cidofovir, lamivudine and fludarabine are potent binders of the spike protein.                                                                                                                                                   | <a href="https://www.sciencedirect.com/science/article/pii/S1046202325000329">https://www.sciencedirect.com/science/article/pii/S1046202325000329</a>                                                         |
| 10  | DB00432 | 0.000119344         | 0.9998807       | docking analysis                                                                    | Virtual screening, ADME/T, and binding free energy analysis of anti-viral, anti-protease, and anti-infectious compounds against NSP10/NSP16 acetyltransferase and main protease of SARS-CoV-2 | Cycloctidine, Hydrochloride, Trifluridine, Adonitol Meropenem, and Penciclovir yielded a preeminent dock score with the main Protease of SARS-CoV-2.                                                                                                                                                               | <a href="https://www.tandfonline.com/doi/full/10.1080/10799893.2020.177298">https://www.tandfonline.com/doi/full/10.1080/10799893.2020.177298</a>                                                             |
| 11  | DB00441 | 0.000127156         | 0.9998728       | cell assay                                                                          | Gemcitabine, Iycorine and oxysphoridine inhibit novel coronavirus (SARS-CoV-2) in cell culture                                                                                                | The antiviral effect of gemcitabine was suppressed efficiently by the cytidine nucleosides. Additionally, combination of gemcitabine with oxysphoridine had an additive antiviral effect against SARS-CoV-2.                                                                                                       | <a href="https://www.tandfonline.com/doi/full/10.1080/2221751.2020.1772676">https://www.tandfonline.com/doi/full/10.1080/2221751.2020.1772676</a>                                                             |
| 12  | DB01390 | 0.00013541          | 0.9998646       | -                                                                                   | A review on probable lysosomotropic properties of Sodium bicarbonate to restrain viral entry of Coronavirus 2 (SARS-CoV-2)                                                                    | sodium bicarbonate could probably help to restrain SARS-CoV-2 infection.                                                                                                                                                                                                                                           | <a href="https://www.academia.edu/download/63336289/COVID_manuscript_updated_120200517-110056-1bhtbp.pdf">https://www.academia.edu/download/63336289/COVID_manuscript_updated_120200517-110056-1bhtbp.pdf</a> |
| 13  | DB01076 | 0.000160189         | 0.9998398       | molecular dynamics simulations                                                      | Drug repurposing against SARS-CoV-2 receptor binding domain using ensemble-based virtual screening and molecular dynamics simulations                                                         | Gonadorelin, fondaparinux, atorvastatin and FAD are good anti-COVID-19 candidates.                                                                                                                                                                                                                                 | <a href="https://www.sciencedirect.com/science/article/pii/S0010482821004285">https://www.sciencedirect.com/science/article/pii/S0010482821004285</a>                                                         |
| 14  | DB00188 | 0.000168492         | 0.99983144      | protein degradation                                                                 | ZMPSTE24 Regulates SARS-CoV-2 Spike Protein -enhanced Expression of Endothelial PAI-1                                                                                                         | We examined the role of protein degradation in this SARS-CoV-2-SI induction of PAI-1 and found that the proteasomal degradation inhibitor bortezomib inhibited SARS-CoV-2-SI-mediated changes in PAI-1.                                                                                                            | <a href="https://www.atsjournals.org/doi/full/10.1161/ramh.2020-05440C">https://www.atsjournals.org/doi/full/10.1161/ramh.2020-05440C</a>                                                                     |
| 15  | DB01396 | 0.000186073         | 0.999814        | rat model                                                                           | Antiviral activity of digoxin and ouabain against SARS-CoV-2 infection and its implication for COVID-19                                                                                       | Interestingly, a recent study reported that digitoxin, a CG, suppresses proinflammatory cytokines in influenza A virus-infected cotton rat lung3, which suggests that DIG and OUA may have an additional therapeutic role against COVID-19 with hypercytokinemia.                                                  | <a href="https://www.nature.com/articles/s41598-020-72879-7">https://www.nature.com/articles/s41598-020-72879-7</a>                                                                                           |
| 16  | DB12328 | 0.000233808         | 0.9997662       | cell assay                                                                          | Screening a Library of FDA-Approved and Bioactive Compounds for Antiviral Activity against SARS-CoV-2                                                                                         | seven compounds that have not previously been reported to have anti-SARS-CoV-2 activity: the CDK inhibitor AZD5363, the AKT inhibitor SC59, the MEK1 inhibitor BMS-754807, the NADPH oxidase inhibitor GKT137831, the RAS1 inhibitor BI02, the steroid budesonide, and the anti-inflammatory compound cantharidin. | <a href="https://pubs.acs.org/doi/full/10.1021/acsinfecdis.1c00017">https://pubs.acs.org/doi/full/10.1021/acsinfecdis.1c00017</a>                                                                             |
| 17  | DB11342 | 0.000268696         | 0.99973124      | DNA-DNA and DNA-RNA hybridization                                                   | Surface Functionalized Anodic Aluminum Oxide Membrane for Opto-Nanofluidic SARS-CoV-2 Genomic Target Detection                                                                                | An ultra-thin and highly sensitive SARS-CoV-2 detection platform was demonstrated using a nanoporous anodic aluminum oxide (AAO) membrane.                                                                                                                                                                         | <a href="https://ieeexplore.ieee.org/abstract/document/9526041">https://ieeexplore.ieee.org/abstract/document/9526041</a>                                                                                     |
| 18  | DB11127 | 0.000276717         | 0.99972326      | -                                                                                   | Role of Selenium in Viral Infections with a Major Focus on SARS-CoV-2                                                                                                                         | gov that will examine the efficacy of Se (selenium acid infusion also known as sodium selenite) for the treatment of moderately-ill, severely ill, and critically ill COVID-19 patients                                                                                                                            | <a href="https://www.mdpi.com/1422-0067/23/1/280/htm">https://www.mdpi.com/1422-0067/23/1/280/htm</a>                                                                                                         |
| 19  | DB13178 | 0.000285523         | 0.99971443      | mouse model                                                                         | Role of inositol to improve surfactant functions and reduce IL-6 levels: A potential adjuvant strategy for SARS-CoV-2 pneumonia?                                                              | the action of myo-inositol on IRE1 endonuclease activity may also inhibit the replication of SARS-CoV-2                                                                                                                                                                                                            | <a href="https://www.sciencedirect.com/science/article/pii/S0306987720325238">https://www.sciencedirect.com/science/article/pii/S0306987720325238</a>                                                         |
| 20  | DB13245 | 0.000289247         | 0.99971074      |                                                                                     |                                                                                                                                                                                               |                                                                                                                                                                                                                                                                                                                    |                                                                                                                                                                                                               |
| 21  | DB00194 | 0.000341161         | 0.9996588       |                                                                                     |                                                                                                                                                                                               |                                                                                                                                                                                                                                                                                                                    |                                                                                                                                                                                                               |
| 22  | DB00960 | 0.00035644          | 0.9996494       |                                                                                     |                                                                                                                                                                                               |                                                                                                                                                                                                                                                                                                                    |                                                                                                                                                                                                               |
| 23  | DB11967 | 0.000356515         | 0.99964345      |                                                                                     |                                                                                                                                                                                               |                                                                                                                                                                                                                                                                                                                    |                                                                                                                                                                                                               |
| 24  | DB11098 | 0.00037954          | 0.99962044      |                                                                                     |                                                                                                                                                                                               |                                                                                                                                                                                                                                                                                                                    |                                                                                                                                                                                                               |
| 25  | DB11678 | 0.0004005           | 0.9995995       |                                                                                     |                                                                                                                                                                                               |                                                                                                                                                                                                                                                                                                                    |                                                                                                                                                                                                               |
| 26  | DB13063 | 0.00042746          | 0.9995726       |                                                                                     |                                                                                                                                                                                               |                                                                                                                                                                                                                                                                                                                    |                                                                                                                                                                                                               |
| 27  | DB11748 | 0.000438486         | 0.9995615       |                                                                                     |                                                                                                                                                                                               |                                                                                                                                                                                                                                                                                                                    |                                                                                                                                                                                                               |
| 28  | DB11068 | 0.00045498          | 0.99954945      |                                                                                     |                                                                                                                                                                                               |                                                                                                                                                                                                                                                                                                                    |                                                                                                                                                                                                               |
| 29  | DB06768 | 0.000482366         | 0.9995177       |                                                                                     |                                                                                                                                                                                               |                                                                                                                                                                                                                                                                                                                    |                                                                                                                                                                                                               |
| 30  | DB11689 | 0.000500575         | 0.99949944      |                                                                                     |                                                                                                                                                                                               |                                                                                                                                                                                                                                                                                                                    |                                                                                                                                                                                                               |
| 31  | DB14203 | 0.000511625         | 0.99948835      |                                                                                     |                                                                                                                                                                                               |                                                                                                                                                                                                                                                                                                                    |                                                                                                                                                                                                               |
| 32  | DB01179 | 0.000521309         | 0.99947876      |                                                                                     |                                                                                                                                                                                               |                                                                                                                                                                                                                                                                                                                    |                                                                                                                                                                                                               |
| 33  | DB01094 | 0.000533967         | 0.999466        |                                                                                     |                                                                                                                                                                                               |                                                                                                                                                                                                                                                                                                                    |                                                                                                                                                                                                               |
| 34  | DB06176 | 0.000581063         | 0.999419        |                                                                                     |                                                                                                                                                                                               |                                                                                                                                                                                                                                                                                                                    |                                                                                                                                                                                                               |
| 35  | DB00446 | 0.00062235          | 0.99937767      |                                                                                     |                                                                                                                                                                                               |                                                                                                                                                                                                                                                                                                                    |                                                                                                                                                                                                               |
| 36  | DB00822 | 0.000638793         | 0.9993612       |                                                                                     |                                                                                                                                                                                               |                                                                                                                                                                                                                                                                                                                    |                                                                                                                                                                                                               |
| 37  | DB00443 | 0.000640175         | 0.9993598       |                                                                                     |                                                                                                                                                                                               |                                                                                                                                                                                                                                                                                                                    |                                                                                                                                                                                                               |
| 38  | DB12010 | 0.000728193         | 0.9992718       |                                                                                     |                                                                                                                                                                                               |                                                                                                                                                                                                                                                                                                                    |                                                                                                                                                                                                               |
| 39  | DB11178 | 0.000761132         | 0.9992529       |                                                                                     |                                                                                                                                                                                               |                                                                                                                                                                                                                                                                                                                    |                                                                                                                                                                                                               |
| 40  | DB09145 | 0.00080204          | 0.999198        |                                                                                     |                                                                                                                                                                                               |                                                                                                                                                                                                                                                                                                                    |                                                                                                                                                                                                               |
| 41  | DB08965 | 0.000833197         | 0.99916685      |                                                                                     |                                                                                                                                                                                               |                                                                                                                                                                                                                                                                                                                    |                                                                                                                                                                                                               |
| 42  | DB11125 | 0.000861979         | 0.999138        |                                                                                     |                                                                                                                                                                                               |                                                                                                                                                                                                                                                                                                                    |                                                                                                                                                                                                               |
| 43  | DB00928 | 0.000929453         | 0.9990706       |                                                                                     |                                                                                                                                                                                               |                                                                                                                                                                                                                                                                                                                    |                                                                                                                                                                                                               |
| 44  | DB00864 | 0.000954289         | 0.99904667      |                                                                                     |                                                                                                                                                                                               |                                                                                                                                                                                                                                                                                                                    |                                                                                                                                                                                                               |
| 45  | DB12529 | 0.000971302         | 0.9990287       |                                                                                     |                                                                                                                                                                                               |                                                                                                                                                                                                                                                                                                                    |                                                                                                                                                                                                               |
| 46  | DB01024 | 0.001047038         | 0.998953        |                                                                                     |                                                                                                                                                                                               |                                                                                                                                                                                                                                                                                                                    |                                                                                                                                                                                                               |
| 47  | DB01003 | 0.001056458         | 0.9989435       |                                                                                     |                                                                                                                                                                                               |                                                                                                                                                                                                                                                                                                                    |                                                                                                                                                                                                               |
| 48  | DB00929 | 0.001236218         | 0.9987638       |                                                                                     |                                                                                                                                                                                               |                                                                                                                                                                                                                                                                                                                    |                                                                                                                                                                                                               |
| 49  | DB01092 | 0.001244825         | 0.9987552       |                                                                                     |                                                                                                                                                                                               |                                                                                                                                                                                                                                                                                                                    |                                                                                                                                                                                                               |
| 50  | DB01832 | 0.001244982         | 0.998755        |                                                                                     |                                                                                                                                                                                               |                                                                                                                                                                                                                                                                                                                    |                                                                                                                                                                                                               |
| 51  | DB00119 | 0.001292768         | 0.9987072       |                                                                                     |                                                                                                                                                                                               |                                                                                                                                                                                                                                                                                                                    |                                                                                                                                                                                                               |
| 52  | DB00399 | 0.00132027          | 0.9986797       |                                                                                     |                                                                                                                                                                                               |                                                                                                                                                                                                                                                                                                                    |                                                                                                                                                                                                               |
| 53  | DB08889 | 0.001376388         | 0.9986236       |                                                                                     |                                                                                                                                                                                               |                                                                                                                                                                                                                                                                                                                    |                                                                                                                                                                                                               |
| 54  | DB00262 | 0.001390441         | 0.99860954      |                                                                                     |                                                                                                                                                                                               |                                                                                                                                                                                                                                                                                                                    |                                                                                                                                                                                                               |
| 55  | DB01339 | 0.001433654         | 0.99856636      |                                                                                     |                                                                                                                                                                                               |                                                                                                                                                                                                                                                                                                                    |                                                                                                                                                                                                               |
| 56  | DB09146 | 0.001523895         | 0.9984761       |                                                                                     |                                                                                                                                                                                               |                                                                                                                                                                                                                                                                                                                    |                                                                                                                                                                                                               |
| 57  | DB00199 | 0.001558727         | 0.9984413       |                                                                                     |                                                                                                                                                                                               |                                                                                                                                                                                                                                                                                                                    |                                                                                                                                                                                                               |
| 58  | DB00511 | 0.001611261         | 0.99838877      |                                                                                     |                                                                                                                                                                                               |                                                                                                                                                                                                                                                                                                                    |                                                                                                                                                                                                               |
| 59  | DB11633 | 0.001653934         | 0.9983461       |                                                                                     |                                                                                                                                                                                               |                                                                                                                                                                                                                                                                                                                    |                                                                                                                                                                                                               |
| 60  | DB09112 | 0.001673126         | 0.99832684      |                                                                                     |                                                                                                                                                                                               |                                                                                                                                                                                                                                                                                                                    |                                                                                                                                                                                                               |
| 61  | DB06137 | 0.001757698         | 0.99828416      |                                                                                     |                                                                                                                                                                                               |                                                                                                                                                                                                                                                                                                                    |                                                                                                                                                                                                               |
| 62  | DB11326 | 0.001729767         | 0.9982703       |                                                                                     |                                                                                                                                                                                               |                                                                                                                                                                                                                                                                                                                    |                                                                                                                                                                                                               |
| 63  | DB12942 | 0.001807733         | 0.99819225      |                                                                                     |                                                                                                                                                                                               |                                                                                                                                                                                                                                                                                                                    |                                                                                                                                                                                                               |
| 64  | DB06603 | 0.00191879          | 0.9980812       |                                                                                     |                                                                                                                                                                                               |                                                                                                                                                                                                                                                                                                                    |                                                                                                                                                                                                               |
| 65  | DB00688 | 0.001993559         | 0.9980604       |                                                                                     |                                                                                                                                                                                               |                                                                                                                                                                                                                                                                                                                    |                                                                                                                                                                                                               |
| 66  | DB11431 | 0.002030312         | 0.9979697       |                                                                                     |                                                                                                                                                                                               |                                                                                                                                                                                                                                                                                                                    |                                                                                                                                                                                                               |
| 67  | DB00563 | 0.002194257         | 0.9978068       |                                                                                     |                                                                                                                                                                                               |                                                                                                                                                                                                                                                                                                                    |                                                                                                                                                                                                               |
| 68  | DB06723 | 0.002197639         | 0.9978023       |                                                                                     |                                                                                                                                                                                               |                                                                                                                                                                                                                                                                                                                    |                                                                                                                                                                                                               |
| 69  | DB09282 | 0.002232435         | 0.99776757      |                                                                                     |                                                                                                                                                                                               |                                                                                                                                                                                                                                                                                                                    |                                                                                                                                                                                                               |
| 70  | DB14475 | 0.002350248         | 0.9976497       |                                                                                     |                                                                                                                                                                                               |                                                                                                                                                                                                                                                                                                                    |                                                                                                                                                                                                               |
| 71  | DB00834 | 0.0023613           | 0.9976387       |                                                                                     |                                                                                                                                                                                               |                                                                                                                                                                                                                                                                                                                    |                                                                                                                                                                                                               |
| 72  | DB09042 | 0.002380667         | 0.9974166       |                                                                                     |                                                                                                                                                                                               |                                                                                                                                                                                                                                                                                                                    |                                                                                                                                                                                                               |
| 73  | DB09063 | 0.002621131         | 0.99737895      |                                                                                     |                                                                                                                                                                                               |                                                                                                                                                                                                                                                                                                                    |                                                                                                                                                                                                               |
| 74  | DB08874 | 0.002642174         | 0.9973578       |                                                                                     |                                                                                                                                                                                               |                                                                                                                                                                                                                                                                                                                    |                                                                                                                                                                                                               |
| 75  | DB08860 | 0.002693576         | 0.99730647      |                                                                                     |                                                                                                                                                                                               |                                                                                                                                                                                                                                                                                                                    |                                                                                                                                                                                                               |
| 76  | DB00362 | 0.002730286         | 0.9972697       |                                                                                     |                                                                                                                                                                                               |                                                                                                                                                                                                                                                                                                                    |                                                                                                                                                                                                               |
| 77  | DB00889 | 0.002808443         | 0.9971946       |                                                                                     |                                                                                                                                                                                               |                                                                                                                                                                                                                                                                                                                    |                                                                                                                                                                                                               |
| 78  | DB13249 | 0.003171489         | 0.9968285       |                                                                                     |                                                                                                                                                                                               |                                                                                                                                                                                                                                                                                                                    |                                                                                                                                                                                                               |
| 79  | DB08801 | 0.003223177         | 0.9967769       |                                                                                     |                                                                                                                                                                                               |                                                                                                                                                                                                                                                                                                                    |                                                                                                                                                                                                               |
| 80  | DB01299 | 0.003238469         | 0.99676055      |                                                                                     |                                                                                                                                                                                               |                                                                                                                                                                                                                                                                                                                    |                                                                                                                                                                                                               |
| 81  | DB04398 | 0.003257616         | 0.9967424       |                                                                                     |                                                                                                                                                                                               |                                                                                                                                                                                                                                                                                                                    |                                                                                                                                                                                                               |
| 82  | DB00410 | 0.003289912         | 0.99671006      |                                                                                     |                                                                                                                                                                                               |                                                                                                                                                                                                                                                                                                                    |                                                                                                                                                                                                               |

|     |         |             |            |
|-----|---------|-------------|------------|
| 83  | DB01030 | 0.003315077 | 0.99668497 |
| 84  | DB00242 | 0.003398254 | 0.9966017  |
| 85  | DB01248 | 0.003492264 | 0.9965244  |
| 86  | DB00477 | 0.003492264 | 0.9965077  |
| 87  | DB06287 | 0.003583015 | 0.9964169  |
| 88  | DB14520 | 0.003600627 | 0.9963994  |
| 89  | DB00315 | 0.003679474 | 0.9963205  |
| 89  | DB11779 | 0.003899977 | 0.99631008 |
| 91  | DB11151 | 0.003852658 | 0.9961474  |
| 92  | DB13952 | 0.00394808  | 0.99605197 |
| 93  | DB00322 | 0.004064297 | 0.9959357  |
| 94  | DB00342 | 0.004078431 | 0.9959216  |
| 95  | DB09477 | 0.004112673 | 0.99588734 |
| 96  | DB01288 | 0.0043318   | 0.99566674 |
| 97  | DB06441 | 0.004490262 | 0.99550974 |
| 98  | DB13282 | 0.004509331 | 0.99549073 |
| 99  | DB11641 | 0.004540091 | 0.99545985 |
| 100 | DB11718 | 0.004699128 | 0.9953009  |
| 101 | DB12265 | 0.004876507 | 0.99512345 |
| 102 | DB09241 | 0.005027936 | 0.9949272  |
| 103 | DB01234 | 0.005183468 | 0.9948165  |
| 104 | DB11183 | 0.005188871 | 0.99481416 |
| 105 | DB11742 | 0.005363312 | 0.9946367  |
| 106 | DB09718 | 0.005418846 | 0.9945832  |
| 107 | DB00548 | 0.005440359 | 0.9945596  |
| 108 | DB00987 | 0.005562337 | 0.9944377  |
| 109 | DB14845 | 0.005665407 | 0.9943346  |
| 110 | DB12767 | 0.005717403 | 0.9942826  |
| 111 | DB00995 | 0.005808424 | 0.9941916  |
| 112 | DB00350 | 0.005833996 | 0.99411595 |
| 113 | DB01421 | 0.005955443 | 0.9940446  |
| 114 | DB06616 | 0.006054328 | 0.99394566 |
| 115 | DB09165 | 0.006170322 | 0.99382967 |
| 116 | DB14485 | 0.006245096 | 0.99375486 |
| 117 | DB01079 | 0.006349443 | 0.9936506  |
| 118 | DB03166 | 0.006360475 | 0.9936365  |
| 119 | DB01394 | 0.006588623 | 0.99341136 |
| 120 | DB00790 | 0.00660993  | 0.9933901  |
| 121 | DB00877 | 0.006685304 | 0.9933147  |
| 122 | DB14506 | 0.006710543 | 0.9932985  |
| 123 | DB01245 | 0.006740821 | 0.9932815  |
| 124 | DB14702 | 0.006911349 | 0.99308866 |
| 125 | DB01005 | 0.006951714 | 0.9930483  |
| 126 | DB02546 | 0.006969153 | 0.99303085 |
| 127 | DB00705 | 0.006985166 | 0.9930148  |
| 128 | DB01188 | 0.007290955 | 0.9927694  |
| 129 | DB06796 | 0.007374543 | 0.9926205  |
| 130 | DB00977 | 0.007450413 | 0.99254954 |
| 131 | DB12483 | 0.007525984 | 0.992474   |
| 132 | DB03312 | 0.007620738 | 0.9923793  |
| 133 | DB09949 | 0.007651144 | 0.9923489  |
| 134 | DB14483 | 0.007750712 | 0.99224925 |
| 135 | DB04209 | 0.007767155 | 0.9922328  |
| 136 | DB11963 | 0.007945118 | 0.99205494 |
| 137 | DB06213 | 0.008161505 | 0.9918385  |
| 138 | DB05630 | 0.008172304 | 0.9918277  |
| 139 | DB01254 | 0.008384584 | 0.9916136  |
| 140 | DB00157 | 0.008828526 | 0.9913715  |
| 141 | DB11583 | 0.008817299 | 0.9911827  |
| 142 | DB00851 | 0.008856363 | 0.9911437  |
| 143 | DB00641 | 0.008990534 | 0.9910095  |
| 144 | DB00158 | 0.009408412 | 0.9909616  |
| 145 | DB01173 | 0.00940244  | 0.9909355  |
| 146 | DB06684 | 0.009409945 | 0.9909501  |
| 147 | DB00207 | 0.009970797 | 0.9900293  |
| 148 | DB00518 | 0.010178609 | 0.98982143 |
| 149 | DB08818 | 0.010683961 | 0.9893161  |
| 150 | DB06738 | 0.010925733 | 0.9890743  |
| 151 | DB09642 | 0.01163191  | 0.9883807  |
| 152 | DB09314 | 0.011870822 | 0.9881292  |
| 153 | DB00452 | 0.011970717 | 0.9880293  |
| 154 | DB04115 | 0.012176139 | 0.98782384 |
| 155 | DB15985 | 0.01251282  | 0.9874787  |
| 156 | DB1158  | 0.01243111  | 0.9875689  |
| 157 | DB09481 | 0.012541188 | 0.9874588  |
| 158 | DB01256 | 0.012792338 | 0.9872077  |
| 159 | DB01180 | 0.013013831 | 0.9869862  |
| 160 | DB08899 | 0.013063277 | 0.98693675 |
| 161 | DB14881 | 0.013181238 | 0.9868188  |
| 162 | DB04564 | 0.01325402  | 0.9867365  |
| 163 | DB01126 | 0.013210963 | 0.98678905 |
| 164 | DB00361 | 0.013240602 | 0.98675936 |
| 165 | DB00543 | 0.013535599 | 0.9864614  |
| 166 | DB04160 | 0.013804073 | 0.9861959  |
| 167 | DB01045 | 0.013804064 | 0.9861556  |
| 168 | DB06215 | 0.01389877  | 0.9861012  |
| 169 | DB14174 | 0.013972131 | 0.98602784 |
| 170 | DB09483 | 0.01429851  | 0.98570144 |
| 171 | DB04812 | 0.014326819 | 0.9856732  |
| 172 | DB11609 | 0.014351673 | 0.9856483  |
| 173 | DB11253 | 0.014406314 | 0.9855935  |
| 174 | DB06717 | 0.014438367 | 0.9855606  |
| 175 | DB01330 | 0.014618892 | 0.9853812  |
| 176 | DB01590 | 0.014774307 | 0.98522574 |
| 177 | DB01322 | 0.014889065 | 0.98511094 |
| 178 | DB09374 | 0.015391853 | 0.9846691  |
| 179 | DB06694 | 0.015470188 | 0.98452973 |
| 180 | DB00592 | 0.0155155   | 0.98448443 |
| 181 | DB14007 | 0.015586918 | 0.9844131  |
| 182 | DB09194 | 0.015775444 | 0.98422456 |
| 183 | DB11594 | 0.015785992 | 0.98421484 |
| 184 | DB14518 | 0.015872763 | 0.9841272  |
| 185 | DB09326 | 0.016761841 | 0.9832381  |
| 186 | DB01213 | 0.016882425 | 0.9831176  |
| 187 | DB11750 | 0.017120266 | 0.9828797  |
| 188 | DB12674 | 0.017274644 | 0.98272544 |
| 189 | DB11942 | 0.01733822  | 0.9826617  |
| 190 | DB00643 | 0.017420914 | 0.9825791  |
| 191 | DB11129 | 0.017695118 | 0.98230493 |
| 192 | DB09274 | 0.018716244 | 0.9812837  |
| 193 | DB01415 | 0.01878512  | 0.9812149  |
| 194 | DB01156 | 0.01889314  | 0.9811069  |
| 195 | DB09031 | 0.01909433  | 0.9809054  |
| 196 | DB01135 | 0.019291705 | 0.9807083  |
| 197 | DB00206 | 0.0193937   | 0.9806626  |
| 198 | DB00337 | 0.019839276 | 0.9801608  |
| 199 | DB00898 | 0.020207658 | 0.97973236 |
| 200 | DB00440 | 0.02022287  | 0.9797142  |
| 201 | DB00944 | 0.020545091 | 0.9794549  |
| 202 | DB00114 | 0.021079635 | 0.97892034 |
| 203 | DB09401 | 0.021980705 | 0.97801924 |
| 204 | DB00970 | 0.022453515 | 0.9775465  |
| 205 | DB05199 | 0.022907349 | 0.9773961  |
| 206 | DB00781 | 0.02293903  | 0.9773564  |
| 207 | DB13749 | 0.023392913 | 0.97660714 |
| 208 | DB04743 | 0.02433808  | 0.9766619  |
| 209 | DB00385 | 0.024394486 | 0.9766055  |
| 210 | DB11652 | 0.02461443  | 0.9763856  |
| 211 | DB00820 | 0.02501161  | 0.9749888  |
| 212 | DB13751 | 0.025140405 | 0.97485954 |
| 213 | DB04820 | 0.025424615 | 0.9745754  |
| 214 | DB11153 | 0.025450427 | 0.9745496  |
| 215 | DB12313 | 0.025872856 | 0.9741271  |
| 216 | DB01226 | 0.02581815  | 0.9741181  |
| 217 | DB00584 | 0.02761813  | 0.9733852  |
| 218 | DB00630 | 0.027746564 | 0.9722534  |
| 219 | DB09121 | 0.027868072 | 0.9721319  |
| 220 | DB15534 | 0.02794955  | 0.97205    |
| 221 | DB11732 | 0.028039316 | 0.9719607  |
| 222 | DB11146 | 0.029219993 | 0.970781   |
| 223 | DB01284 | 0.029485766 | 0.97051424 |
| 224 | DB11264 | 0.029569201 | 0.97043085 |

|     |         |             |            |
|-----|---------|-------------|------------|
| 225 | DB00631 | 0.029584022 | 0.970416   |
| 226 | DB14509 | 0.030213189 | 0.96978486 |
| 227 | DB00773 | 0.030543242 | 0.9684588  |
| 228 | DB00640 | 0.032045227 | 0.9679548  |
| 229 | DB00873 | 0.032161716 | 0.96783835 |
| 230 | DB13955 | 0.0323294   | 0.9676706  |
| 231 | DB00145 | 0.032453816 | 0.96754616 |
| 232 | DB11855 | 0.033474363 | 0.9665266  |
| 233 | DB00883 | 0.033641703 | 0.96635836 |
| 234 | DB00284 | 0.03371318  | 0.9662868  |
| 235 | DB14202 | 0.033746805 | 0.96625316 |
| 236 | DB00839 | 0.034030497 | 0.96596656 |
| 237 | DB11596 | 0.034164038 | 0.965836   |
| 238 | DB00713 | 0.035791872 | 0.9642681  |
| 239 | DB00249 | 0.03640247  | 0.96389754 |
| 240 | DB00552 | 0.036695093 | 0.9633049  |
| 241 | DB00884 | 0.03699962  | 0.9630004  |
| 242 | DB06724 | 0.03751884  | 0.9623812  |
| 243 | DB00926 | 0.038732548 | 0.96126735 |
| 244 | DB01066 | 0.03987947  | 0.96012056 |
| 245 | DB15594 | 0.040197745 | 0.9598022  |
| 246 | DB01098 | 0.040613897 | 0.95938605 |
| 247 | DB11753 | 0.040978782 | 0.95902115 |
| 248 | DB00912 | 0.042046884 | 0.9573532  |
| 249 | DB12267 | 0.043065403 | 0.9569346  |
| 250 | DB09327 | 0.04330072  | 0.95669925 |
| 251 | DB01154 | 0.04389345  | 0.95610654 |
| 252 | DB00273 | 0.045161463 | 0.9548386  |
| 253 | DB12500 | 0.047171854 | 0.9528222  |
| 254 | DB00879 | 0.04838854  | 0.95161146 |
| 255 | DB00817 | 0.048392057 | 0.951608   |
| 256 | DB12825 | 0.04848817  | 0.9515118  |
| 257 | DB13711 | 0.048549723 | 0.9514503  |
| 258 | DB09138 | 0.048992615 | 0.9510074  |
| 259 | DB15328 | 0.04945693  | 0.9505305  |
| 260 | DB12147 | 0.050541714 | 0.94948224 |
| 261 | DB00823 | 0.05074493  | 0.9492551  |
| 262 | DB00594 | 0.050760474 | 0.9492395  |
| 263 | DB00882 | 0.05109071  | 0.94893926 |
| 264 | DB00530 | 0.051523563 | 0.94847643 |
| 265 | DB01247 | 0.051943452 | 0.9480065  |
| 266 | DB01357 | 0.052263867 | 0.94772614 |
| 267 | DB00703 | 0.052783594 | 0.9472184  |
| 268 | DB14669 | 0.053612053 | 0.946388   |
| 269 | DB01022 | 0.054159608 | 0.94584036 |
| 270 | DB09299 | 0.054379627 | 0.9456504  |
| 271 | DB14482 | 0.054811254 | 0.94518876 |
| 272 | DB01100 | 0.0550271   | 0.94297296 |
| 273 | DB00507 | 0.05552062  | 0.9424479  |
| 274 | DB01273 | 0.057595428 | 0.94240457 |
| 275 | DB00479 | 0.057810254 | 0.9421897  |
| 276 | DB01121 | 0.058033478 | 0.9419665  |
| 277 | DB00305 | 0.059050024 | 0.94095004 |
| 278 | DB01392 | 0.05989603  | 0.9401904  |
| 279 | DB05273 | 0.062534764 | 0.93746525 |
| 280 | DB00842 | 0.06265253  | 0.93734753 |
| 281 | DB13421 | 0.0630761   | 0.9369239  |
| 282 | DB16019 | 0.063101456 | 0.9368985  |
| 283 | DB01214 | 0.06354844  | 0.9364516  |
| 284 | DB13851 | 0.06553393  | 0.934466   |
| 285 | DB00492 | 0.06718521  | 0.9328147  |
| 286 | DB00309 | 0.06748597  | 0.932514   |
| 287 | DB00468 | 0.0704705   | 0.9292955  |
| 288 | DB00814 | 0.07068259  | 0.9293174  |
| 289 | DB00756 | 0.07072263  | 0.92927736 |
| 290 | DB09144 | 0.07088053  | 0.92911947 |
| 291 | DB01338 | 0.071373776 | 0.9286263  |
| 292 | DB11171 | 0.07155984  | 0.92844516 |
| 293 | DB00229 | 0.0725688   | 0.9274412  |
| 294 | DB00211 | 0.072583534 | 0.92741644 |
| 295 | DB05382 | 0.072548086 | 0.9264519  |
| 296 | DB00563 | 0.074122705 | 0.92587733 |
| 297 | DB00794 | 0.07582665  | 0.92417437 |
| 298 | DB00497 | 0.07696748  | 0.9232975  |
| 299 | DB13381 | 0.07750224  | 0.92249775 |
| 300 | DB00825 | 0.078213304 | 0.92178667 |
| 301 | DB04880 | 0.07831223  | 0.92168784 |
| 302 | DB00636 | 0.07840732  | 0.9215927  |
| 303 | DB00814 | 0.07929949  | 0.9207095  |
| 304 | DB00710 | 0.07933929  | 0.92060715 |
| 305 | DB00896 | 0.0794281   | 0.92057186 |
| 306 | DB00999 | 0.08051298  | 0.91948706 |
| 307 | DB06772 | 0.08158719  | 0.9184128  |
| 308 | DB00819 | 0.08350038  | 0.9164996  |
| 309 | DB00946 | 0.084390715 | 0.9156093  |
| 310 | DB00581 | 0.08511594  | 0.9148841  |
| 311 | DB00671 | 0.08553469  | 0.9144653  |
| 312 | DB06697 | 0.08564175  | 0.91435826 |
| 313 | DB12001 | 0.08707036  | 0.9129296  |
| 314 | DB00827 | 0.088177815 | 0.9118214  |
| 315 | DB00598 | 0.089441704 | 0.91083833 |
| 316 | DB00911 | 0.09002417  | 0.90997577 |
| 317 | DB11915 | 0.09116553  | 0.9088345  |
| 318 | DB01582 | 0.09168731  | 0.9083127  |
| 319 | DB00193 | 0.09224072  | 0.90775925 |
| 320 | DB13879 | 0.0928162   | 0.9073838  |
| 321 | DB00908 | 0.095635384 | 0.90436465 |
| 322 | DB11197 | 0.095700316 | 0.90429974 |
| 323 | DB00130 | 0.09576751  | 0.90423244 |
| 324 | DB04570 | 0.09652101  | 0.903479   |
| 325 | DB14800 | 0.096716814 | 0.90328324 |
| 326 | DB00884 | 0.09702928  | 0.90340666 |
| 327 | DB00865 | 0.10053202  | 0.89946806 |
| 328 | DB09421 | 0.10064723  | 0.8993528  |
| 329 | DB14189 | 0.10245802  | 0.897542   |
| 330 | DB11102 | 0.103131816 | 0.89686817 |
| 331 | DB00728 | 0.1032539   | 0.8967464  |
| 332 | DB00300 | 0.103294596 | 0.8967054  |
| 333 | DB09473 | 0.103488185 | 0.8965118  |
| 334 | DB14761 | 0.10413102  | 0.89586896 |
| 335 | DB00980 | 0.10426595  | 0.895734   |
| 336 | DB00529 | 0.10436943  | 0.8956334  |
| 337 | DB05676 | 0.10462158  | 0.8953784  |
| 338 | DB14106 | 0.107378826 | 0.89262116 |
| 339 | DB00863 | 0.10746754  | 0.8925324  |
| 340 | DB00778 | 0.10943925  | 0.8905608  |
| 341 | DB00906 | 0.109921776 | 0.8904782  |
| 342 | DB00779 | 0.11050813  | 0.88949186 |
| 343 | DB00762 | 0.11082378  | 0.88917625 |
| 344 | DB12107 | 0.11153781  | 0.88846225 |
| 345 | DB00820 | 0.11240149  | 0.88759845 |
| 346 | DB13157 | 0.11282487  | 0.88717514 |
| 347 | DB11936 | 0.11423587  | 0.8857621  |
| 348 | DB00143 | 0.11450939  | 0.88540666 |
| 349 | DB01093 | 0.11462775  | 0.8853722  |
| 350 | DB00669 | 0.1147365   | 0.8852635  |
| 351 | DB09281 | 0.11642481  | 0.8835752  |
| 352 | DB00789 | 0.118004784 | 0.8819952  |
| 353 | DB00341 | 0.12009937  | 0.8799306  |
| 354 | DB00326 | 0.120440155 | 0.8795599  |
| 355 | DB00955 | 0.12083129  | 0.87916875 |
| 356 | DB06335 | 0.12324212  | 0.87675786 |
| 357 | DB00801 | 0.124035    | 0.875965   |
| 358 | DB14488 | 0.12409623  | 0.8759037  |
| 359 | DB00400 | 0.12455116  | 0.87544876 |
| 360 | DB00718 | 0.12468117  | 0.8753189  |
| 361 | DB00871 | 0.12583855  | 0.8741614  |
| 362 | DB11126 | 0.12595039  | 0.8740494  |
| 363 | DB00965 | 0.12678003  | 0.873292   |
| 364 | DB09242 | 0.12739222  | 0.87260777 |
| 365 | DB12329 | 0.12746704  | 0.87253296 |
| 366 | DB11262 | 0.1275893   | 0.87241066 |

|     |         |            |            |
|-----|---------|------------|------------|
| 367 | DB15575 | 0.13028185 | 0.86971813 |
| 368 | DB08439 | 0.13036404 | 0.86963594 |
| 369 | DB07220 | 0.13146986 | 0.86853014 |
| 370 | DB01026 | 0.13335872 | 0.8666412  |
| 371 | DB12153 | 0.13467737 | 0.86532265 |
| 372 | DB14201 | 0.13537458 | 0.86462545 |
| 373 | DB00716 | 0.135415   | 0.864585   |
| 374 | DB08845 | 0.13587233 | 0.86412764 |
| 375 | DB00134 | 0.13636059 | 0.8636394  |
| 376 | DB00541 | 0.13695207 | 0.8630479  |
| 377 | DB11441 | 0.13714515 | 0.8628549  |
| 378 | DB12020 | 0.13893628 | 0.86106366 |
| 379 | DB01143 | 0.13912243 | 0.8608776  |
| 380 | DB01167 | 0.14022843 | 0.8597757  |
| 381 | DB00976 | 0.1402483  | 0.85975176 |
| 382 | DB00400 | 0.14067633 | 0.8593237  |
| 383 | DB01051 | 0.14078969 | 0.8592103  |
| 384 | DB02123 | 0.14142594 | 0.8585741  |
| 385 | DB13928 | 0.14189136 | 0.8583086  |
| 386 | DB04865 | 0.14266613 | 0.85733384 |
| 387 | DB01337 | 0.14285778 | 0.85714227 |
| 388 | DB09137 | 0.14359415 | 0.8564058  |
| 389 | DB01369 | 0.14674786 | 0.8532522  |
| 390 | DB01336 | 0.1467867  | 0.8532133  |
| 391 | DB08824 | 0.14964882 | 0.85035115 |
| 392 | DB00812 | 0.15115328 | 0.84884673 |
| 393 | DB00444 | 0.15194154 | 0.8480585  |
| 394 | DB00180 | 0.15204327 | 0.8479568  |
| 395 | DB00304 | 0.15224254 | 0.8477575  |
| 396 | DB11617 | 0.15312836 | 0.8488716  |
| 397 | DB01589 | 0.15463439 | 0.84536564 |
| 398 | DB11691 | 0.15503064 | 0.84496945 |
| 399 | DB14110 | 0.15505934 | 0.84494066 |
| 400 | DB03128 | 0.15673727 | 0.84326273 |
| 401 | DB11951 | 0.15684184 | 0.8431581  |
| 402 | DB11134 | 0.15689935 | 0.8430665  |
| 403 | DB00591 | 0.15742452 | 0.8425755  |
| 404 | DB09149 | 0.15773161 | 0.84226835 |
| 405 | DB09140 | 0.15782712 | 0.8421729  |
| 406 | DB00915 | 0.1588556  | 0.8411444  |
| 407 | DB01430 | 0.15975298 | 0.84024745 |
| 408 | DB09152 | 0.1598847  | 0.84011525 |
| 409 | DB11815 | 0.16333193 | 0.8396681  |
| 410 | DB00803 | 0.16407217 | 0.83592784 |
| 411 | DB06614 | 0.1642997  | 0.8357003  |
| 412 | DB00209 | 0.1652298  | 0.8347702  |
| 413 | DB14033 | 0.16581608 | 0.8341839  |
| 414 | DB00460 | 0.16803086 | 0.8319692  |
| 415 | DB04221 | 0.16922028 | 0.83077973 |
| 416 | DB01377 | 0.17000008 | 0.83       |
| 417 | DB00921 | 0.17010221 | 0.8298978  |
| 418 | DB01050 | 0.17108885 | 0.8289311  |
| 419 | DB09220 | 0.17154291 | 0.8284571  |
| 420 | DB00143 | 0.17279677 | 0.8272033  |
| 421 | DB01698 | 0.1739705  | 0.8260295  |
| 422 | DB11828 | 0.17572492 | 0.8242751  |
| 423 | DB13142 | 0.17722355 | 0.82277644 |
| 424 | DB00878 | 0.1778015  | 0.82219845 |
| 425 | DB00227 | 0.17851771 | 0.82148224 |
| 426 | DB00389 | 0.1789737  | 0.8210263  |
| 427 | DB01077 | 0.17976432 | 0.8202357  |
| 428 | DB11874 | 0.18093197 | 0.819068   |
| 429 | DB00950 | 0.18298407 | 0.8170195  |
| 430 | DB00204 | 0.18516694 | 0.814833   |
| 431 | DB00916 | 0.18519306 | 0.8148069  |
| 432 | DB01223 | 0.1861376  | 0.8138624  |
| 433 | DB00536 | 0.18643841 | 0.8135616  |
| 434 | DB00355 | 0.18658726 | 0.8133127  |
| 435 | DB00385 | 0.18705986 | 0.81294066 |
| 436 | DB01260 | 0.18715811 | 0.8128419  |
| 437 | DB08995 | 0.18867608 | 0.8113209  |
| 438 | DB14002 | 0.1898895  | 0.81011057 |
| 439 | DB11279 | 0.19114533 | 0.80885494 |
| 440 | DB11245 | 0.19178855 | 0.8082115  |
| 441 | DB11315 | 0.1927272  | 0.8072728  |
| 442 | DB00646 | 0.19363345 | 0.80636656 |
| 443 | DB08916 | 0.19392926 | 0.80607074 |
| 444 | DB09209 | 0.19431105 | 0.80568594 |
| 445 | DB01583 | 0.19441188 | 0.8055883  |
| 446 | DB09296 | 0.19532678 | 0.8046732  |
| 447 | DB06705 | 0.19613339 | 0.8038666  |
| 448 | DB14569 | 0.1972398  | 0.8027602  |
| 449 | DB09571 | 0.19771221 | 0.8022878  |
| 450 | DB00261 | 0.19848765 | 0.8015123  |
| 451 | DB08864 | 0.20037475 | 0.7992563  |
| 452 | DB06766 | 0.20082472 | 0.79917526 |
| 453 | DB11363 | 0.20294718 | 0.7970528  |
| 454 | DB00700 | 0.2032793  | 0.7967206  |
| 455 | DB04844 | 0.20382772 | 0.79617226 |
| 456 | DB12243 | 0.2049073  | 0.7950967  |
| 457 | DB00732 | 0.2064354  | 0.7935546  |
| 458 | DB11677 | 0.20671931 | 0.7932807  |
| 459 | DB01132 | 0.20709924 | 0.7929008  |
| 460 | DB01178 | 0.2081255  | 0.7918745  |
| 461 | DB12915 | 0.20823385 | 0.79176617 |
| 462 | DB01195 | 0.2083112  | 0.7916689  |
| 463 | DB00627 | 0.20881227 | 0.7911876  |
| 464 | DB12343 | 0.20928359 | 0.79071635 |
| 465 | DB09372 | 0.20952544 | 0.7904746  |
| 466 | DB11577 | 0.20991232 | 0.79008764 |
| 467 | DB12097 | 0.21126108 | 0.7883798  |
| 468 | DB00520 | 0.21197665 | 0.7880244  |
| 469 | DB13947 | 0.21291654 | 0.7870845  |
| 470 | DB06348 | 0.21328041 | 0.78671956 |
| 471 | DB11853 | 0.21820876 | 0.78179127 |
| 472 | DB00673 | 0.2207862  | 0.7792138  |
| 473 | DB00551 | 0.22223234 | 0.7777677  |
| 474 | DB06196 | 0.22468114 | 0.77531886 |
| 475 | DB00853 | 0.225427   | 0.774573   |
| 476 | DB03904 | 0.22598456 | 0.7740155  |
| 477 | DB09079 | 0.22924888 | 0.77075315 |
| 478 | DB13322 | 0.23116875 | 0.7688325  |
| 479 | DB01014 | 0.23474368 | 0.7652563  |
| 480 | DB11245 | 0.23574653 | 0.76425344 |
| 481 | DB11248 | 0.23789437 | 0.76210564 |
| 482 | DB11181 | 0.24018039 | 0.7598196  |
| 483 | DB00478 | 0.24099171 | 0.7590083  |
| 484 | DB01177 | 0.24145633 | 0.75853367 |
| 485 | DB00615 | 0.24245712 | 0.7575429  |
| 486 | DB01145 | 0.24351479 | 0.75648516 |
| 487 | DB01152 | 0.24384779 | 0.7561523  |
| 488 | DB09267 | 0.24524958 | 0.75475043 |
| 489 | DB15233 | 0.25117839 | 0.7489217  |
| 490 | DB00601 | 0.25133207 | 0.7486679  |
| 491 | DB06767 | 0.25269683 | 0.74730414 |
| 492 | DB08822 | 0.2540081  | 0.7469919  |
| 493 | DB04348 | 0.25536454 | 0.7446355  |
| 494 | DB01022 | 0.25992655 | 0.74306345 |
| 495 | DB08837 | 0.2571984  | 0.7428016  |
| 496 | DB11210 | 0.2604352  | 0.7395648  |
| 497 | DB00276 | 0.2623714  | 0.73762864 |
| 498 | DB03615 | 0.263085   | 0.73691493 |
| 499 | DB03766 | 0.2634459  | 0.736554   |
| 500 | DB12839 | 0.26562154 | 0.73437846 |
| 501 | DB01598 | 0.26568336 | 0.7341664  |
| 502 | DB00224 | 0.26713067 | 0.7328693  |
| 503 | DB02325 | 0.27316344 | 0.72683656 |
| 504 | DB01081 | 0.27503252 | 0.7249675  |
| 505 | DB01416 | 0.27848873 | 0.72151124 |
| 506 | DB00831 | 0.2782096  | 0.7211783  |
| 507 | DB00267 | 0.2808451  | 0.7191549  |
| 508 | DB06663 | 0.28399244 | 0.7160076  |

|     |         |            |            |
|-----|---------|------------|------------|
| 509 | DB01603 | 0.28738147 | 0.7126186  |
| 510 | DB08813 | 0.28739003 | 0.71221    |
| 511 | DB11110 | 0.28842272 | 0.7156734  |
| 512 | DB09158 | 0.28860325 | 0.7113967  |
| 513 | DB04911 | 0.2897388  | 0.71026117 |
| 514 | DB09460 | 0.29001638 | 0.7099836  |
| 515 | DB15091 | 0.2902173  | 0.7097827  |
| 516 | DB11348 | 0.29131627 | 0.7088617  |
| 517 | DB11619 | 0.2917241  | 0.7082756  |
| 518 | DB00696 | 0.29281822 | 0.7071818  |
| 519 | DB00576 | 0.29307625 | 0.7069237  |
| 520 | DB01613 | 0.29314813 | 0.70685184 |
| 521 | DB0410  | 0.29392925 | 0.7050907  |
| 522 | DB00747 | 0.29404922 | 0.70385184 |
| 523 | DB00252 | 0.2962471  | 0.70375293 |
| 524 | DB00449 | 0.29628798 | 0.70371205 |
| 525 | DB01061 | 0.30036008 | 0.6996399  |
| 526 | DB09156 | 0.30598313 | 0.69401893 |
| 527 | DB11995 | 0.30699438 | 0.69300856 |
| 528 | DB01046 | 0.30738473 | 0.6926152  |
| 529 | DB03017 | 0.30770582 | 0.69229424 |
| 530 | DB08973 | 0.30783632 | 0.69216365 |
| 531 | DB03793 | 0.30961052 | 0.6903895  |
| 532 | DB09499 | 0.31100936 | 0.6889904  |
| 533 | DB14484 | 0.3116292  | 0.68837184 |
| 534 | DB01329 | 0.31364584 | 0.6863542  |
| 535 | DB00216 | 0.31427902 | 0.6857209  |
| 536 | DB01579 | 0.3149646  | 0.6850354  |
| 537 | DB00123 | 0.31839573 | 0.68160427 |
| 538 | DB00748 | 0.31872688 | 0.6812711  |
| 539 | DB01621 | 0.32058504 | 0.67941487 |
| 540 | DB11793 | 0.32241362 | 0.67758644 |
| 541 | DB00638 | 0.32867083 | 0.67132914 |
| 542 | DB00602 | 0.32956466 | 0.6704353  |
| 543 | DB13678 | 0.33008604 | 0.6699614  |
| 544 | DB01162 | 0.3304288  | 0.66957164 |
| 545 | DB09371 | 0.33075315 | 0.66924685 |
| 546 | DB12130 | 0.33150196 | 0.6684981  |
| 547 | DB11142 | 0.33213055 | 0.66786945 |
| 548 | DB11640 | 0.33369172 | 0.6653083  |
| 549 | DB13997 | 0.33488503 | 0.66514494 |
| 550 | DB09513 | 0.3352963  | 0.6647038  |
| 551 | DB00774 | 0.3365374  | 0.66346264 |
| 552 | DB01072 | 0.33685762 | 0.6631424  |
| 553 | DB01249 | 0.3379815  | 0.66201854 |
| 554 | DB04846 | 0.33867283 | 0.66032714 |
| 555 | DB08906 | 0.33971038 | 0.66028665 |
| 556 | DB15694 | 0.34570777 | 0.6542922  |
| 557 | DB01101 | 0.34618378 | 0.6538163  |
| 558 | DB08901 | 0.34746218 | 0.6525378  |
| 559 | DB04920 | 0.34780136 | 0.6521987  |
| 560 | DB00613 | 0.3480225  | 0.6519775  |
| 561 | DB00740 | 0.3486222  | 0.65137786 |
| 562 | DB14658 | 0.34953663 | 0.65046334 |
| 563 | DB09160 | 0.3533954  | 0.6466046  |
| 564 | DB04816 | 0.3537736  | 0.64622164 |
| 565 | DB09435 | 0.35430577 | 0.64569414 |
| 566 | DB01618 | 0.35498914 | 0.6450109  |
| 567 | DB00201 | 0.35615146 | 0.64384854 |
| 568 | DB00941 | 0.3603434  | 0.6396566  |
| 569 | DB11835 | 0.3611652  | 0.63883483 |
| 570 | DB00560 | 0.36203715 | 0.6379329  |
| 571 | DB01259 | 0.3646411  | 0.6333889  |
| 572 | DB01129 | 0.3654401  | 0.6345599  |
| 573 | DB09517 | 0.36556327 | 0.6344367  |
| 574 | DB01605 | 0.36729982 | 0.63270026 |
| 575 | DB14109 | 0.36851504 | 0.6314849  |
| 576 | DB00192 | 0.37039286 | 0.6298072  |
| 577 | DB01176 | 0.37459734 | 0.6254027  |
| 578 | DB01002 | 0.37701094 | 0.6229891  |
| 579 | DB00797 | 0.37779316 | 0.62220687 |
| 580 | DB00964 | 0.3801884  | 0.6198116  |
| 581 | DB04116 | 0.3803827  | 0.6196173  |
| 582 | DB12070 | 0.38118246 | 0.6187145  |
| 583 | DB00794 | 0.38311294 | 0.6188871  |
| 584 | DB14895 | 0.38324696 | 0.616753   |
| 585 | DB00739 | 0.38466552 | 0.6153445  |
| 586 | DB01133 | 0.3847539  | 0.6152461  |
| 587 | DB14501 | 0.3848975  | 0.6131025  |
| 588 | DB09510 | 0.3874307  | 0.6125633  |
| 589 | DB09148 | 0.38771185 | 0.6122881  |
| 590 | DB00619 | 0.38851935 | 0.61148065 |
| 591 | DB06154 | 0.38874555 | 0.61125445 |
| 592 | DB00539 | 0.3955915  | 0.6044085  |
| 593 | DB09183 | 0.39688104 | 0.6033189  |
| 594 | DB00352 | 0.3985112  | 0.60148877 |
| 595 | DB09068 | 0.40090415 | 0.5990958  |
| 596 | DB12954 | 0.40445712 | 0.5955429  |
| 597 | DB09276 | 0.4063002  | 0.5936998  |
| 598 | DB01987 | 0.4081456  | 0.5918544  |
| 599 | DB05328 | 0.41671064 | 0.5829894  |
| 600 | DB11278 | 0.41974846 | 0.5802515  |
| 601 | DB00274 | 0.4199285  | 0.5800715  |
| 602 | DB00612 | 0.4215672  | 0.5784328  |
| 603 | DB09324 | 0.42401254 | 0.5759874  |
| 604 | DB14159 | 0.4248395  | 0.5751605  |
| 605 | DB00353 | 0.42967245 | 0.5703275  |
| 606 | DB09048 | 0.43057483 | 0.5694252  |
| 607 | DB06261 | 0.43193826 | 0.56806177 |
| 608 | DB12789 | 0.43194026 | 0.5680597  |
| 609 | DB06751 | 0.43200283 | 0.5679907  |
| 610 | DB06132 | 0.43462982 | 0.5653701  |
| 611 | DB05018 | 0.43476003 | 0.5652399  |
| 612 | DB04143 | 0.4348893  | 0.56511074 |
| 613 | DB01265 | 0.43555397 | 0.5644461  |
| 614 | DB00875 | 0.43630737 | 0.5636926  |
| 615 | DB00272 | 0.4370459  | 0.5629541  |
| 616 | DB00483 | 0.43881206 | 0.56018794 |
| 617 | DB08944 | 0.44175327 | 0.5582468  |
| 618 | DB13967 | 0.44260088 | 0.5573992  |
| 619 | DB01089 | 0.4441224  | 0.5558776  |
| 620 | DB09991 | 0.4444753  | 0.5552477  |
| 621 | DB00014 | 0.4453392  | 0.5546497  |
| 622 | DB01171 | 0.4462277  | 0.5537723  |
| 623 | DB00251 | 0.44666276 | 0.55339724 |
| 624 | DB00131 | 0.44687974 | 0.5531202  |
| 625 | DB00836 | 0.44854525 | 0.5514547  |
| 626 | DB00484 | 0.45113534 | 0.5488647  |
| 627 | DB13946 | 0.4541274  | 0.5458726  |
| 628 | DB09403 | 0.45452788 | 0.5454721  |
| 629 | DB01393 | 0.45631222 | 0.5436877  |
| 630 | DB08827 | 0.45673096 | 0.54326934 |
| 631 | DB00457 | 0.4570543  | 0.54294574 |
| 632 | DB01426 | 0.4572027  | 0.54279274 |
| 633 | DB01558 | 0.45806414 | 0.54193586 |
| 634 | DB09151 | 0.45915648 | 0.54084355 |
| 635 | DB13209 | 0.46184614 | 0.5381538  |
| 636 | DB11705 | 0.46235606 | 0.53764397 |
| 637 | DB09487 | 0.46362897 | 0.53638616 |
| 638 | DB00848 | 0.46370137 | 0.53629863 |
| 639 | DB11653 | 0.4638619  | 0.53613806 |
| 640 | DB14082 | 0.4656559  | 0.53434414 |
| 641 | DB00907 | 0.46663618 | 0.5336338  |
| 642 | DB01696 | 0.4676432  | 0.5323688  |
| 643 | DB11168 | 0.4682233  | 0.53177667 |
| 644 | DB01090 | 0.468908   | 0.53109205 |
| 645 | DB06237 | 0.46907696 | 0.530923   |
| 646 | DB09394 | 0.47090846 | 0.5290915  |
| 647 | DB00927 | 0.47105983 | 0.52894914 |
| 648 | DB11591 | 0.47154382 | 0.5284542  |
| 649 | DB08819 | 0.47251886 | 0.5274812  |
| 650 | DB12865 | 0.47409236 | 0.52590764 |

|     |         |            |            |
|-----|---------|------------|------------|
| 651 | DB00260 | 0.4741004  | 0.52589965 |
| 652 | DB00245 | 0.4746101  | 0.52538997 |
| 653 | DB01102 | 0.47470692 | 0.5252993  |
| 654 | DB09376 | 0.47544357 | 0.5245564  |
| 655 | DB00826 | 0.4756667  | 0.5243933  |
| 656 | DB01056 | 0.47568673 | 0.5243133  |
| 657 | DB00569 | 0.47585166 | 0.5241484  |
| 658 | DB12532 | 0.4770444  | 0.52295666 |
| 659 | DB00176 | 0.4771388  | 0.52286124 |
| 660 | DB01440 | 0.48064497 | 0.51935506 |
| 661 | DB00268 | 0.4811797  | 0.5188202  |
| 662 | DB06087 | 0.48237634 | 0.51762366 |
| 663 | DB00775 | 0.48369842 | 0.51633416 |
| 664 | DB13800 | 0.48406288 | 0.51593745 |
| 665 | DB06799 | 0.48621443 | 0.51378554 |
| 666 | DB11284 | 0.4869736  | 0.51302636 |
| 667 | DB06403 | 0.48831886 | 0.5116811  |
| 668 | DB09214 | 0.48901324 | 0.5119857  |
| 669 | DB09426 | 0.48832385 | 0.51187652 |
| 670 | DB09094 | 0.4907175  | 0.5092926  |
| 671 | DB00320 | 0.49441814 | 0.5058186  |
| 672 | DB05389 | 0.49463972 | 0.50536025 |
| 673 | DB14879 | 0.49747708 | 0.50252295 |
| 674 | DB01327 | 0.49805947 | 0.50094956 |
| 675 | DB00488 | 0.49946082 | 0.50053924 |
| 676 | DB14490 | 0.5002521  | 0.49974784 |
| 677 | DB09139 | 0.50124377 | 0.4987563  |
| 678 | DB11932 | 0.5023942  | 0.4976058  |
| 679 | DB11950 | 0.5024267  | 0.49757338 |
| 680 | DB11820 | 0.50558203 | 0.49411794 |
| 681 | DB00832 | 0.5094659  | 0.49053413 |
| 682 | DB09346 | 0.50996673 | 0.49003324 |
| 683 | DB12026 | 0.51091194 | 0.4890881  |
| 684 | DB00398 | 0.51306194 | 0.4869381  |
| 685 | DB00570 | 0.5146227  | 0.48537734 |
| 686 | DB00907 | 0.5157065  | 0.48429654 |
| 687 | DB06809 | 0.51617265 | 0.48382738 |
| 688 | DB13532 | 0.5162388  | 0.48376122 |
| 689 | DB13274 | 0.51628363 | 0.48371646 |
| 690 | DB13238 | 0.51632395 | 0.48364708 |
| 691 | DB11189 | 0.5170902  | 0.48293978 |
| 692 | DB12902 | 0.5180082  | 0.48199186 |
| 693 | DB04890 | 0.5181206  | 0.4818794  |
| 694 | DB00672 | 0.51862603 | 0.48137397 |
| 695 | DB12978 | 0.52049047 | 0.47950653 |
| 696 | DB12474 | 0.5205924  | 0.47940758 |
| 697 | DB01021 | 0.522864   | 0.4713602  |
| 698 | DB01200 | 0.5229142  | 0.47708583 |
| 699 | DB00239 | 0.5278236  | 0.47217637 |
| 700 | DB09268 | 0.5303316  | 0.46966836 |
| 701 | DB00583 | 0.5319099  | 0.46809015 |
| 702 | DB12161 | 0.5338734  | 0.4661207  |
| 703 | DB00688 | 0.53438485 | 0.46561515 |
| 704 | DB01048 | 0.5344682  | 0.4655318  |
| 705 | DB00314 | 0.53964525 | 0.46435478 |
| 706 | DB06816 | 0.5371333  | 0.4628667  |
| 707 | DB14527 | 0.53884447 | 0.46115556 |
| 708 | DB00705 | 0.5392012  | 0.46079877 |
| 709 | DB00142 | 0.54017925 | 0.45982078 |
| 710 | DB09291 | 0.5412023  | 0.45879772 |
| 711 | DB13873 | 0.5448869  | 0.45511314 |
| 712 | DB00202 | 0.54491615 | 0.45508385 |
| 713 | DB00152 | 0.5457025  | 0.45429745 |
| 714 | DB11637 | 0.54578114 | 0.4542189  |
| 715 | DB13262 | 0.54769796 | 0.452302   |
| 716 | DB13444 | 0.5502944  | 0.44977555 |
| 717 | DB00178 | 0.5504295  | 0.4495705  |
| 718 | DB13455 | 0.55098638 | 0.44901305 |
| 719 | DB01351 | 0.5533746  | 0.44628948 |
| 720 | DB00802 | 0.5549164  | 0.4450836  |
| 721 | DB09161 | 0.5584273  | 0.44457233 |
| 722 | DB04855 | 0.5555201  | 0.44447988 |
| 723 | DB00364 | 0.5580705  | 0.44329246 |
| 724 | DB01212 | 0.55753    | 0.44247004 |
| 725 | DB11837 | 0.55903465 | 0.44096532 |
| 726 | DB14075 | 0.55962026 | 0.4403798  |
| 727 | DB04839 | 0.56068844 | 0.4393115  |
| 728 | DB09320 | 0.56348103 | 0.43651897 |
| 729 | DB00691 | 0.5636934  | 0.4363095  |
| 730 | DB00909 | 0.5639136  | 0.43508642 |
| 731 | DB06690 | 0.5647891  | 0.4352109  |
| 732 | DB14914 | 0.5671936  | 0.43280634 |
| 733 | DB13100 | 0.5676111  | 0.4323889  |
| 734 | DB09910 | 0.5699611  | 0.43033893 |
| 735 | DB12434 | 0.5710647  | 0.4283535  |
| 736 | DB14105 | 0.5717073  | 0.4282926  |
| 737 | DB00844 | 0.5719129  | 0.42808715 |
| 738 | DB00940 | 0.57210845 | 0.42789158 |
| 739 | DB00369 | 0.5722999  | 0.42770016 |
| 740 | DB09469 | 0.5729379  | 0.4270621  |
| 741 | DB00554 | 0.5749694  | 0.42653036 |
| 742 | DB00929 | 0.5740821  | 0.42591798 |
| 743 | DB06402 | 0.57469416 | 0.42530587 |
| 744 | DB11263 | 0.5749857  | 0.42501426 |
| 745 | DB00535 | 0.5751599  | 0.42484015 |
| 746 | DB01112 | 0.5762902  | 0.42370678 |
| 747 | DB00947 | 0.57670414 | 0.42329592 |
| 748 | DB09270 | 0.5780595  | 0.4219405  |
| 749 | DB08947 | 0.5783965  | 0.42160347 |
| 750 | DB14015 | 0.579135   | 0.42086497 |
| 751 | DB00828 | 0.5794171  | 0.42058286 |
| 752 | DB00825 | 0.5804881  | 0.41951188 |
| 753 | DB00645 | 0.58186996 | 0.41813004 |
| 754 | DB13247 | 0.5827644  | 0.4172356  |
| 755 | DB01297 | 0.58304876 | 0.41695127 |
| 756 | DB01196 | 0.5847727  | 0.41522726 |
| 757 | DB01328 | 0.58748436 | 0.4125156  |
| 758 | DB09097 | 0.58804125 | 0.41195878 |
| 759 | DB00280 | 0.58844674 | 0.41155323 |
| 760 | DB00395 | 0.5902718  | 0.4097283  |
| 761 | DB09027 | 0.5914847  | 0.4085153  |
| 762 | DB00333 | 0.5937178  | 0.40682822 |
| 763 | DB01141 | 0.5944185  | 0.40538153 |
| 764 | DB00429 | 0.5986608  | 0.4013391  |
| 765 | DB09055 | 0.6027034  | 0.39729658 |
| 766 | DB00699 | 0.6034506  | 0.39654946 |
| 767 | DB13944 | 0.60732734 | 0.39267263 |
| 768 | DB00629 | 0.6075668  | 0.39233323 |
| 769 | DB00229 | 0.6080798  | 0.39192024 |
| 770 | DB00733 | 0.60996246 | 0.39003757 |
| 771 | DB01186 | 0.61053795 | 0.389462   |
| 772 | DB01219 | 0.61198974 | 0.3880103  |
| 773 | DB09607 | 0.61292677 | 0.38743426 |
| 774 | DB14198 | 0.6129794  | 0.38742417 |
| 775 | DB14078 | 0.6146151  | 0.38538498 |
| 776 | DB12035 | 0.6171879  | 0.38281217 |
| 777 | DB04540 | 0.6194477  | 0.38055226 |
| 778 | DB12834 | 0.62189543 | 0.37810454 |
| 779 | DB00665 | 0.6227068  | 0.37729388 |
| 780 | DB01620 | 0.6227274  | 0.3772226  |
| 781 | DB11080 | 0.62354547 | 0.37645453 |
| 782 | DB11332 | 0.6239097  | 0.37609038 |
| 783 | DB00817 | 0.6241578  | 0.3758422  |
| 784 | DB01544 | 0.6261316  | 0.37188844 |
| 785 | DB01501 | 0.6306358  | 0.36936417 |
| 786 | DB01839 | 0.63286185 | 0.3671381  |
| 787 | DB01206 | 0.63351256 | 0.36648753 |
| 788 | DB11986 | 0.6337     | 0.3663     |
| 789 | DB00402 | 0.63592225 | 0.36407778 |
| 790 | DB00784 | 0.63631163 | 0.36308546 |
| 791 | DB02703 | 0.6365277  | 0.36347222 |
| 792 | DB04339 | 0.6366868  | 0.3633132  |

|     |         |            |            |
|-----|---------|------------|------------|
| 793 | DB05260 | 0.63884836 | 0.36115167 |
| 794 | DB08852 | 0.6406123  | 0.35938767 |
| 795 | DB15982 | 0.6411292  | 0.35877694 |
| 796 | DB13267 | 0.6447242  | 0.3552758  |
| 797 | DB00278 | 0.6473211  | 0.35267892 |
| 798 | DB08931 | 0.64995915 | 0.35004088 |
| 799 | DB01364 | 0.65017354 | 0.34982943 |
| 800 | DB00121 | 0.65193554 | 0.34804437 |
| 801 | DB09124 | 0.6519655  | 0.3480345  |
| 802 | DB09090 | 0.6574303  | 0.3425697  |
| 803 | DB00626 | 0.65745276 | 0.3425473  |
| 804 | DB00782 | 0.6576118  | 0.3423882  |
| 805 | DB01597 | 0.6581149  | 0.34188506 |
| 806 | DB00880 | 0.658483   | 0.34051704 |
| 807 | DB03808 | 0.66013527 | 0.3398648  |
| 808 | DB00923 | 0.6608455  | 0.33915445 |
| 809 | DB00798 | 0.6619621  | 0.3380379  |
| 810 | DB09120 | 0.66581696 | 0.33418298 |
| 811 | DB00271 | 0.6669748  | 0.33302522 |
| 812 | DB09480 | 0.6672341  | 0.33266598 |
| 813 | DB01435 | 0.6718742  | 0.32812572 |
| 814 | DB05246 | 0.67194617 | 0.3280539  |
| 815 | DB09116 | 0.67245495 | 0.32754505 |
| 816 | DB13878 | 0.67335    | 0.32669005 |
| 817 | DB11201 | 0.6748372  | 0.32518298 |
| 818 | DB09280 | 0.6757235  | 0.32427648 |
| 819 | DB00517 | 0.67574745 | 0.32425552 |
| 820 | DB00272 | 0.67629903 | 0.32379103 |
| 821 | DB14001 | 0.6768917  | 0.32310835 |
| 822 | DB00077 | 0.67737687 | 0.322621   |
| 823 | DB14642 | 0.67742753 | 0.32257244 |
| 824 | DB01320 | 0.6775192  | 0.32248077 |
| 825 | DB00558 | 0.6790244  | 0.32097566 |
| 826 | DB11090 | 0.67913973 | 0.32086618 |
| 827 | DB13620 | 0.6804901  | 0.31954986 |
| 828 | DB01711 | 0.68045485 | 0.31954512 |
| 829 | DB00404 | 0.6818347  | 0.31816536 |
| 830 | DB05239 | 0.6826782  | 0.3173218  |
| 831 | DB06144 | 0.6833823  | 0.3166178  |
| 832 | DB00981 | 0.6866615  | 0.31333685 |
| 833 | DB00528 | 0.6880894  | 0.31319058 |
| 834 | DB00952 | 0.6874016  | 0.31259835 |
| 835 | DB04573 | 0.69066346 | 0.30933654 |
| 836 | DB00126 | 0.6944379  | 0.30556208 |
| 837 | DB00418 | 0.69473    | 0.30527005 |
| 838 | DB00139 | 0.69597876 | 0.30412027 |
| 839 | DB00862 | 0.69778883 | 0.3025114  |
| 840 | DB00172 | 0.6984072  | 0.30159283 |
| 841 | DB00430 | 0.69915295 | 0.3008471  |
| 842 | DB06626 | 0.6997256  | 0.30027443 |
| 843 | DB08897 | 0.7015953  | 0.29840472 |
| 844 | DB00501 | 0.7016501  | 0.29834922 |
| 845 | DB09502 | 0.70319027 | 0.29680967 |
| 846 | DB15934 | 0.7035235  | 0.29647654 |
| 847 | DB00757 | 0.7039047  | 0.29609534 |
| 848 | DB11699 | 0.7055544  | 0.29444456 |
| 849 | DB00984 | 0.7070177  | 0.29286337 |
| 850 | DB00915 | 0.7079071  | 0.292093   |
| 851 | DB09563 | 0.71007    | 0.28993005 |
| 852 | DB15598 | 0.712253   | 0.28774703 |
| 853 | DB01303 | 0.71431667 | 0.28568327 |
| 854 | DB00900 | 0.71441185 | 0.28558815 |
| 855 | DB00819 | 0.7147688  | 0.2853231  |
| 856 | DB00821 | 0.7150308  | 0.28496918 |
| 857 | DB11221 | 0.7167476  | 0.28325245 |
| 858 | DB00622 | 0.71750635 | 0.28249365 |
| 859 | DB00827 | 0.7217755  | 0.27822456 |
| 860 | DB09699 | 0.7277199  | 0.2728004  |
| 861 | DB09154 | 0.72901868 | 0.2718903  |
| 862 | DB11611 | 0.72903806 | 0.27096194 |
| 863 | DB08938 | 0.72915035 | 0.27084967 |
| 864 | DB13966 | 0.72957015 | 0.27042982 |
| 865 | DB00438 | 0.7304041  | 0.26959595 |
| 866 | DB13955 | 0.7307929  | 0.26932085 |
| 867 | DB00754 | 0.7313909  | 0.26860914 |
| 868 | DB11573 | 0.7323549  | 0.2676451  |
| 869 | DB00035 | 0.7325868  | 0.2674132  |
| 870 | DB01239 | 0.7329609  | 0.26703915 |
| 871 | DB01282 | 0.7340779  | 0.2653261  |
| 872 | DB04951 | 0.734157   | 0.26538435 |
| 873 | DB00388 | 0.7364767  | 0.26352328 |
| 874 | DB00655 | 0.73699886 | 0.26300117 |
| 875 | DB11656 | 0.73809165 | 0.26190832 |
| 876 | DB00587 | 0.7387287  | 0.2612721  |
| 877 | DB14840 | 0.7417688  | 0.2582129  |
| 878 | DB11275 | 0.743394   | 0.25660598 |
| 879 | DB00792 | 0.7448571  | 0.25514293 |
| 880 | DB15479 | 0.746565   | 0.25343502 |
| 881 | DB05245 | 0.7467926  | 0.25320742 |
| 882 | DB09539 | 0.7474337  | 0.25226663 |
| 883 | DB09552 | 0.748248   | 0.25175005 |
| 884 | DB01043 | 0.7493946  | 0.25060534 |
| 885 | DB12457 | 0.7496971  | 0.25030294 |
| 886 | DB06151 | 0.7503698  | 0.24963024 |
| 887 | DB01082 | 0.7517726  | 0.24822743 |
| 888 | DB00980 | 0.7541073  | 0.24582772 |
| 889 | DB14018 | 0.75676566 | 0.24323434 |
| 890 | DB00345 | 0.7595167  | 0.24048322 |
| 891 | DB05381 | 0.7607248  | 0.2392752  |
| 892 | DB14194 | 0.7609068  | 0.23909321 |
| 893 | DB00985 | 0.7612379  | 0.23879244 |
| 894 | DB00869 | 0.762075   | 0.23829201 |
| 895 | DB00027 | 0.76482624 | 0.23517382 |
| 896 | DB09345 | 0.7648894  | 0.23511058 |
| 897 | DB00302 | 0.764985   | 0.23501493 |
| 898 | DB08918 | 0.7652346  | 0.23476651 |
| 899 | DB09389 | 0.7663726  | 0.2336278  |
| 900 | DB04931 | 0.7667582  | 0.23324181 |
| 901 | DB00403 | 0.76723385 | 0.23276621 |
| 902 | DB09154 | 0.76866573 | 0.2313343  |
| 903 | DB06174 | 0.7687634  | 0.23123655 |
| 904 | DB09138 | 0.7691311  | 0.23088883 |
| 905 | DB00608 | 0.76938087 | 0.23061912 |
| 906 | DB00401 | 0.7701311  | 0.22986886 |
| 907 | DB01291 | 0.7703966  | 0.22960347 |
| 908 | DB06826 | 0.77061844 | 0.22938156 |
| 909 | DB12301 | 0.7725533  | 0.22744663 |
| 910 | DB13962 | 0.7731597  | 0.22684024 |
| 911 | DB06218 | 0.7743867  | 0.22561336 |
| 912 | DB00296 | 0.7776722  | 0.22232787 |
| 913 | DB11989 | 0.78003615 | 0.21996385 |
| 914 | DB00746 | 0.7808526  | 0.2191474  |
| 915 | DB15996 | 0.7813167  | 0.21888332 |
| 916 | DB14849 | 0.7814655  | 0.2186255  |
| 917 | DB11191 | 0.78268653 | 0.21731345 |
| 918 | DB09039 | 0.7845619  | 0.21543805 |
| 919 | DB01047 | 0.7862083  | 0.21379173 |
| 920 | DB00213 | 0.7874475  | 0.21252552 |
| 921 | DB01295 | 0.7884094  | 0.2116591  |
| 922 | DB01041 | 0.78806704 | 0.211933   |
| 923 | DB00120 | 0.78850096 | 0.21149907 |
| 924 | DB00577 | 0.78864205 | 0.21135795 |
| 925 | DB14491 | 0.7906903  | 0.2093097  |
| 926 | DB09493 | 0.7938535  | 0.20614651 |
| 927 | DB11901 | 0.79455256 | 0.20544745 |
| 928 | DB06814 | 0.7950802  | 0.20491977 |
| 929 | DB00845 | 0.79583824 | 0.20416169 |
| 930 | DB08809 | 0.79690725 | 0.20309277 |
| 931 | DB01602 | 0.7983321  | 0.20160785 |
| 932 | DB01331 | 0.79909617 | 0.2009038  |
| 933 | DB09420 | 0.79916406 | 0.20083596 |
| 934 | DB00367 | 0.7995294  | 0.20047066 |

|      |         |            |             |
|------|---------|------------|-------------|
| 935  | DB15779 | 0.80079883 | 0.19920118  |
| 936  | DB00211 | 0.8008826  | 0.19914745  |
| 937  | DB11791 | 0.80092853 | 0.19907147  |
| 938  | DB00807 | 0.80236554 | 0.19763449  |
| 939  | DB00485 | 0.80331594 | 0.19668412  |
| 940  | DB11800 | 0.80383    | 0.19616994  |
| 941  | DB12225 | 0.80437315 | 0.19562687  |
| 942  | DB00391 | 0.8060654  | 0.19399455  |
| 943  | DB13156 | 0.8064762  | 0.19352378  |
| 944  | DB01136 | 0.8070885  | 0.19291154  |
| 945  | DB12362 | 0.80728084 | 0.19271913  |
| 946  | DB00247 | 0.80875945 | 0.19124061  |
| 947  | DB12941 | 0.80886525 | 0.19113474  |
| 948  | DB00824 | 0.8089693  | 0.19109507  |
| 949  | DB01011 | 0.8089759  | 0.19102412  |
| 950  | DB06265 | 0.8089795  | 0.19102047  |
| 951  | DB00195 | 0.8096624  | 0.1903376   |
| 952  | DB13279 | 0.81191595 | 0.18808307  |
| 953  | DB00975 | 0.81233335 | 0.18769694  |
| 954  | DB00628 | 0.81285787 | 0.1871421   |
| 955  | DB00974 | 0.8135238  | 0.18647611  |
| 956  | DB00290 | 0.814741   | 0.185259    |
| 957  | DB13977 | 0.8148221  | 0.18517795  |
| 958  | DB09674 | 0.8151888  | 0.18481024  |
| 959  | DB01395 | 0.8152285  | 0.18476051  |
| 960  | DB00288 | 0.81548214 | 0.18451788  |
| 961  | DB13743 | 0.8155278  | 0.18447216  |
| 962  | DB00948 | 0.815652   | 0.18434803  |
| 963  | DB01611 | 0.8169776  | 0.18302238  |
| 964  | DB00810 | 0.8171647  | 0.18283653  |
| 965  | DB01033 | 0.8173488  | 0.1826513   |
| 966  | DB04861 | 0.81834376 | 0.18165626  |
| 967  | DB06817 | 0.8219195  | 0.17808051  |
| 968  | DB09067 | 0.8222928  | 0.17770718  |
| 969  | DB13273 | 0.82257634 | 0.17742489  |
| 970  | DB02772 | 0.8229275  | 0.17673722  |
| 971  | DB11239 | 0.8243423  | 0.17565767  |
| 972  | DB00711 | 0.82439727 | 0.17560275  |
| 973  | DB11761 | 0.8245891  | 0.17541094  |
| 974  | DB01424 | 0.8247646  | 0.17523359  |
| 975  | DB09047 | 0.82569027 | 0.17430669  |
| 976  | DB08826 | 0.82694674 | 0.17305326  |
| 977  | DB00872 | 0.8271158  | 0.17288423  |
| 978  | DB03255 | 0.8293492  | 0.17065075  |
| 979  | DB00841 | 0.8310454  | 0.16895461  |
| 980  | DB09753 | 0.8320591  | 0.1679439   |
| 981  | DB14627 | 0.83294296 | 0.16705702  |
| 982  | DB14674 | 0.83341146 | 0.16658853  |
| 983  | DB06775 | 0.83371013 | 0.16628984  |
| 984  | DB00701 | 0.8340487  | 0.1659513   |
| 985  | DB12523 | 0.8347986  | 0.1652002   |
| 986  | DB01051 | 0.835716   | 0.16428399  |
| 987  | DB00495 | 0.83606714 | 0.16392382  |
| 988  | DB01591 | 0.8370761  | 0.16292386  |
| 989  | DB00823 | 0.83726716 | 0.16273285  |
| 990  | DB11757 | 0.837358   | 0.1626641   |
| 991  | DB00397 | 0.8374381  | 0.16254193  |
| 992  | DB00256 | 0.8386166  | 0.16138344  |
| 993  | DB12141 | 0.83910656 | 0.16089341  |
| 994  | DB00712 | 0.83982354 | 0.16017641  |
| 995  | DB01201 | 0.84043294 | 0.15956704  |
| 996  | DB09142 | 0.84057176 | 0.15942821  |
| 997  | DB09448 | 0.84057176 | 0.15942821  |
| 998  | DB13872 | 0.84130883 | 0.15869121  |
| 999  | DB09114 | 0.84164184 | 0.15835817  |
| 1000 | DB09071 | 0.8422835  | 0.15771653  |
| 1001 | DB00318 | 0.84260076 | 0.15739622  |
| 1002 | DB15305 | 0.84267469 | 0.15729233  |
| 1003 | DB00590 | 0.8434383  | 0.15668172  |
| 1004 | DB00670 | 0.843515   | 0.15648507  |
| 1005 | DB03585 | 0.84428644 | 0.15571357  |
| 1006 | DB00644 | 0.84428906 | 0.15571098  |
| 1007 | DB14568 | 0.8446746  | 0.15532543  |
| 1008 | DB01191 | 0.8448951  | 0.15510485  |
| 1009 | DB01199 | 0.84518415 | 0.15481582  |
| 1010 | DB00632 | 0.8462552  | 0.15374474  |
| 1011 | DB05990 | 0.84630454 | 0.15369543  |
| 1012 | DB00791 | 0.84640295 | 0.15359072  |
| 1013 | DB00800 | 0.8469131  | 0.15306887  |
| 1014 | DB00480 | 0.847367   | 0.152633    |
| 1015 | DB04832 | 0.84812623 | 0.15187374  |
| 1016 | DB00486 | 0.84867644 | 0.15132354  |
| 1017 | DB00531 | 0.8487235  | 0.1512765   |
| 1018 | DB13114 | 0.84888136 | 0.15111873  |
| 1019 | DB06275 | 0.84922483 | 0.15076724  |
| 1020 | DB04575 | 0.8491324  | 0.15068755  |
| 1021 | DB01009 | 0.8493194  | 0.15068056  |
| 1022 | DB01116 | 0.84967065 | 0.1503293   |
| 1023 | DB00521 | 0.8508245  | 0.14917547  |
| 1024 | DB08147 | 0.8511826  | 0.14881742  |
| 1025 | DB11796 | 0.8513842  | 0.14861576  |
| 1026 | DB06788 | 0.85306007 | 0.14693993  |
| 1027 | DB11091 | 0.8536601  | 0.1463399   |
| 1028 | DB01625 | 0.853996   | 0.14600402  |
| 1029 | DB00151 | 0.854896   | 0.14513038  |
| 1030 | DB00319 | 0.8556559  | 0.14434314  |
| 1031 | DB14554 | 0.8558283  | 0.14441718  |
| 1032 | DB13222 | 0.8565205  | 0.14347954  |
| 1033 | DB00998 | 0.856731   | 0.14326897  |
| 1034 | DB01599 | 0.8572326  | 0.14276874  |
| 1035 | DB14283 | 0.85742801 | 0.14274989  |
| 1036 | DB15102 | 0.8574882  | 0.1426118   |
| 1037 | DB01438 | 0.8581178  | 0.14188221  |
| 1038 | DB15477 | 0.8586515  | 0.14134845  |
| 1039 | DB11362 | 0.8590715  | 0.14092849  |
| 1040 | DB09123 | 0.8593491  | 0.140651    |
| 1041 | DB05521 | 0.859815   | 0.14018498  |
| 1042 | DB09236 | 0.86099035 | 0.13900967  |
| 1043 | DB01346 | 0.86138606 | 0.13861391  |
| 1044 | DB00662 | 0.86174595 | 0.13825408  |
| 1045 | DB14116 | 0.8626975  | 0.13730253  |
| 1046 | DB09059 | 0.863726   | 0.13627404  |
| 1047 | DB06282 | 0.86384535 | 0.13615465  |
| 1048 | DB01039 | 0.864388   | 0.13561203  |
| 1049 | DB01577 | 0.8653638  | 0.13463621  |
| 1050 | DB01087 | 0.86736697 | 0.13263302  |
| 1051 | DB09340 | 0.86822934 | 0.13176064  |
| 1052 | DB0170  | 0.86954063 | 0.13045641  |
| 1053 | DB00115 | 0.86992    | 0.13008003  |
| 1054 | DB08881 | 0.87020004 | 0.12979999  |
| 1055 | DB11574 | 0.87028354 | 0.12971652  |
| 1056 | DB14677 | 0.8703062  | 0.12969385  |
| 1057 | DB06735 | 0.8720319  | 0.12799804  |
| 1058 | DB00377 | 0.87202744 | 0.12797262  |
| 1059 | DB01119 | 0.8732006  | 0.12679644  |
| 1060 | DB14496 | 0.8741588  | 0.12584123  |
| 1061 | DB00312 | 0.87472415 | 0.12527587  |
| 1062 | DB08895 | 0.8747797  | 0.1252293   |
| 1063 | DB01380 | 0.8754798  | 0.124520175 |
| 1064 | DB00885 | 0.87619823 | 0.12380175  |
| 1065 | DB11233 | 0.8763386  | 0.12364621  |
| 1066 | DB14646 | 0.87648964 | 0.12351036  |
| 1067 | DB01121 | 0.8771267  | 0.12287332  |
| 1068 | DB00951 | 0.8781675  | 0.121832274 |
| 1069 | DB00292 | 0.8784212  | 0.12157882  |
| 1070 | DB13970 | 0.87851006 | 0.12148993  |
| 1071 | DB13954 | 0.8786397  | 0.12136028  |
| 1072 | DB09534 | 0.87875724 | 0.12124274  |
| 1073 | DB00339 | 0.8788078  | 0.12119224  |
| 1074 | DB08401 | 0.8796359  | 0.12036409  |
| 1075 | DB00770 | 0.8797135  | 0.1202865   |
| 1076 | DB09488 | 0.88003516 | 0.1199648   |



|      |         |            |             |
|------|---------|------------|-------------|
| 1077 | DB01253 | 0.8803768  | 0.11662317  |
| 1078 | DB01186 | 0.8804173  | 0.11658671  |
| 1079 | DB01099 | 0.8807695  | 0.115220444 |
| 1080 | DB11614 | 0.8810124  | 0.118987925 |
| 1081 | DB08908 | 0.88101655 | 0.11898341  |
| 1082 | DB00104 | 0.88222766 | 0.11772731  |
| 1083 | DB11485 | 0.8822443  | 0.1175575   |
| 1084 | DB01128 | 0.8825553  | 0.1174465   |
| 1085 | DB11184 | 0.8844011  | 0.11559886  |
| 1086 | DB11450 | 0.88451696 | 0.11548341  |
| 1087 | DB00238 | 0.88461524 | 0.11538474  |
| 1088 | DB00597 | 0.88555413 | 0.11444593  |
| 1089 | DB11943 | 0.88644826 | 0.11355176  |
| 1090 | DB01233 | 0.88657176 | 0.11342829  |
| 1091 | DB06783 | 0.88690215 | 0.11309781  |
| 1092 | DB03193 | 0.8870976  | 0.11290239  |
| 1093 | DB01400 | 0.88723356 | 0.11276644  |
| 1094 | DB09133 | 0.8887769  | 0.11222305  |
| 1095 | DB00370 | 0.88921335 | 0.11078484  |
| 1096 | DB14598 | 0.8895586  | 0.11041138  |
| 1097 | DB01222 | 0.88984066 | 0.11015935  |
| 1098 | DB01198 | 0.890556   | 0.10944398  |
| 1099 | DB13253 | 0.8907119  | 0.10928811  |
| 1100 | DB11585 | 0.8908222  | 0.10917782  |
| 1101 | DB00608 | 0.8908366  | 0.10912835  |
| 1102 | DB00234 | 0.8914896  | 0.10851042  |
| 1103 | DB09415 | 0.8915261  | 0.10842386  |
| 1104 | DB01401 | 0.892069   | 0.10793103  |
| 1105 | DB01020 | 0.8921993  | 0.10789084  |
| 1106 | DB11979 | 0.8926601  | 0.10733993  |
| 1107 | DB06821 | 0.89306885 | 0.10693117  |
| 1108 | DB09377 | 0.8936467  | 0.10635326  |
| 1109 | DB11512 | 0.8937202  | 0.106279746 |
| 1110 | DB01610 | 0.89473356 | 0.10626651  |
| 1111 | DB00538 | 0.8946256  | 0.10537441  |
| 1112 | DB00277 | 0.8947612  | 0.105238795 |
| 1113 | DB01083 | 0.89490926 | 0.10509079  |
| 1114 | DB00913 | 0.89502764 | 0.104972415 |
| 1115 | DB00588 | 0.89519256 | 0.10480738  |
| 1116 | DB09078 | 0.8952258  | 0.10477418  |
| 1117 | DB01144 | 0.8957707  | 0.10429226  |
| 1118 | DB00783 | 0.8963651  | 0.103634864 |
| 1119 | DB00419 | 0.8964613  | 0.103538744 |
| 1120 | DB00294 | 0.89715767 | 0.102842316 |
| 1121 | DB08966 | 0.89870775 | 0.10129231  |
| 1122 | DB14544 | 0.8991102  | 0.10088888  |
| 1123 | DB12332 | 0.8992895  | 0.10071049  |
| 1124 | DB00196 | 0.8997041  | 0.1002959   |
| 1125 | DB11093 | 0.89983594 | 0.10016405  |
| 1126 | DB01183 | 0.90143955 | 0.09856045  |
| 1127 | DB00527 | 0.9016251  | 0.09837497  |
| 1128 | DB11100 | 0.9019603  | 0.09806369  |
| 1129 | DB09269 | 0.90283227 | 0.09716776  |
| 1130 | DB01247 | 0.90302587 | 0.09697422  |
| 1131 | DB00331 | 0.9031002  | 0.09689982  |
| 1132 | DB00693 | 0.9049307  | 0.09506933  |
| 1133 | DB13720 | 0.9056214  | 0.09437887  |
| 1134 | DB00323 | 0.9063594  | 0.09364066  |
| 1135 | DB00217 | 0.90637124 | 0.09362881  |
| 1136 | DB06589 | 0.9082613  | 0.09173871  |
| 1137 | DB00471 | 0.90865535 | 0.09134655  |
| 1138 | DB01111 | 0.90900666 | 0.09099338  |
| 1139 | DB01374 | 0.9096102  | 0.09038981  |
| 1140 | DB12554 | 0.90988323 | 0.0901367   |
| 1141 | DB11587 | 0.910789   | 0.08921103  |
| 1142 | DB14657 | 0.91089195 | 0.08910802  |
| 1143 | DB01074 | 0.91097546 | 0.08902451  |
| 1144 | DB09351 | 0.9115361  | 0.08846835  |
| 1145 | DB11933 | 0.9117494  | 0.08820615  |
| 1146 | DB00140 | 0.91176003 | 0.08823992  |
| 1147 | DB14156 | 0.91245127 | 0.087548755 |
| 1148 | DB08804 | 0.9131699  | 0.08683008  |
| 1149 | DB11190 | 0.9133294  | 0.086667    |
| 1150 | DB08849 | 0.913386   | 0.086614    |
| 1151 | DB00406 | 0.9142038  | 0.085796155 |
| 1152 | DB04038 | 0.9142644  | 0.08573563  |
| 1153 | DB14083 | 0.9156046  | 0.08439539  |
| 1154 | DB00145 | 0.915955   | 0.08404498  |
| 1155 | DB01559 | 0.918434   | 0.08357599  |
| 1156 | DB12407 | 0.9188332  | 0.08316896  |
| 1157 | DB13707 | 0.9169929  | 0.08300707  |
| 1158 | DB01085 | 0.9176353  | 0.082364745 |
| 1159 | DB11340 | 0.91793716 | 0.08206291  |
| 1160 | DB00538 | 0.9187363  | 0.08126267  |
| 1161 | DB00297 | 0.9187618  | 0.08121383  |
| 1162 | DB11157 | 0.91906885 | 0.08093313  |
| 1163 | DB00731 | 0.9190913  | 0.08090834  |
| 1164 | DB08867 | 0.9193558  | 0.08064417  |
| 1165 | DB01628 | 0.9195663  | 0.08043331  |
| 1166 | DB00847 | 0.91975734 | 0.08029213  |
| 1167 | DB01326 | 0.9202788  | 0.079721265 |
| 1168 | DB11155 | 0.9205813  | 0.07941874  |
| 1169 | DB01419 | 0.9211407  | 0.07885936  |
| 1170 | DB13170 | 0.921485   | 0.078514926 |
| 1171 | DB12612 | 0.92159164 | 0.07840834  |
| 1172 | DB13965 | 0.9223295  | 0.07747408  |
| 1173 | DB00381 | 0.9225982  | 0.07740173  |
| 1174 | DB09419 | 0.9228094  | 0.077190556 |
| 1175 | DB00310 | 0.92303807 | 0.07696191  |
| 1176 | DB00437 | 0.9232456  | 0.0767544   |
| 1177 | DB00288 | 0.9237378  | 0.07623215  |
| 1178 | DB00812 | 0.9238584  | 0.07614422  |
| 1179 | DB14099 | 0.9241003  | 0.07589669  |
| 1180 | DB00830 | 0.9241342  | 0.07586587  |
| 1181 | DB11952 | 0.9248069  | 0.07519306  |
| 1182 | DB01340 | 0.9250737  | 0.0744927   |
| 1183 | DB11842 | 0.9257842  | 0.07421579  |
| 1184 | DB09321 | 0.9260042  | 0.07395578  |
| 1185 | DB06703 | 0.92630154 | 0.07369842  |
| 1186 | DB13213 | 0.92718214 | 0.07281784  |
| 1187 | DB09115 | 0.9277893  | 0.07220077  |
| 1188 | DB09709 | 0.9285347  | 0.0714658   |
| 1189 | DB00842 | 0.92815053 | 0.07184949  |
| 1190 | DB00697 | 0.9286791  | 0.07132085  |
| 1191 | DB04703 | 0.9287453  | 0.07125465  |
| 1192 | DB13167 | 0.92891604 | 0.07108395  |
| 1193 | DB00243 | 0.92910874 | 0.07089123  |
| 1194 | DB14643 | 0.9291853  | 0.07094656  |
| 1195 | DB09125 | 0.92929167 | 0.070708305 |
| 1196 | DB01156 | 0.9293078  | 0.07069216  |
| 1197 | DB00118 | 0.92966795 | 0.07033203  |
| 1198 | DB14723 | 0.9303231  | 0.06967695  |
| 1199 | DB00742 | 0.9303683  | 0.06963615  |
| 1200 | DB00936 | 0.9307444  | 0.06925663  |
| 1201 | DB11206 | 0.93097264 | 0.06902733  |
| 1202 | DB13858 | 0.9312322  | 0.068767756 |
| 1203 | DB00383 | 0.9312709  | 0.06872906  |
| 1204 | DB00182 | 0.9313045  | 0.06869544  |
| 1205 | DB12783 | 0.9320938  | 0.067940645 |
| 1206 | DB00776 | 0.9323887  | 0.06761129  |
| 1207 | DB00464 | 0.9325474  | 0.06745295  |
| 1208 | DB00919 | 0.93259085 | 0.06744921  |
| 1209 | DB09135 | 0.93262565 | 0.06737429  |
| 1210 | DB01224 | 0.9331154  | 0.06688455  |
| 1211 | DB13781 | 0.9338214  | 0.0661786   |
| 1212 | DB01105 | 0.9340446  | 0.06595544  |
| 1213 | DB11117 | 0.9341037  | 0.06589663  |
| 1214 | DB00805 | 0.9341039  | 0.06589606  |
| 1215 | DB11586 | 0.9348707  | 0.06512933  |
| 1216 | DB01612 | 0.9351783  | 0.06482178  |
| 1217 | DB15494 | 0.9351892  | 0.06481076  |
| 1218 | DB14644 | 0.9356306  | 0.064369336 |

|      |         |            |              |
|------|---------|------------|--------------|
| 1219 | DB12887 | 0.9357946  | 0.064205416  |
| 1220 | DB00209 | 0.9301285  | 0.063871655  |
| 1221 | DB00728 | 0.9307298  | 0.062972076  |
| 1222 | DB00496 | 0.9370492  | 0.062950805  |
| 1223 | DB00512 | 0.93727934 | 0.06272061   |
| 1224 | DB06274 | 0.9374416  | 0.06255844   |
| 1225 | DB13231 | 0.9381933  | 0.061906886  |
| 1226 | DB09237 | 0.9384193  | 0.06155067   |
| 1227 | DB09313 | 0.9385835  | 0.061416462  |
| 1228 | DB11386 | 0.9389911  | 0.061008878  |
| 1229 | DB15873 | 0.9392314  | 0.0607686    |
| 1230 | DB00769 | 0.9393967  | 0.06060437   |
| 1231 | DB11205 | 0.93961424 | 0.06038577   |
| 1232 | DB09256 | 0.9396978  | 0.06032294   |
| 1233 | DB09380 | 0.9399194  | 0.06008059   |
| 1234 | DB08909 | 0.9399553  | 0.060004726  |
| 1235 | DB01140 | 0.9401344  | 0.05986556   |
| 1236 | DB11486 | 0.9402976  | 0.05970227   |
| 1237 | DB09238 | 0.9404694  | 0.059530612  |
| 1238 | DB00760 | 0.94086915 | 0.05912083   |
| 1239 | DB09699 | 0.9409631  | 0.059035918  |
| 1240 | DB06786 | 0.940981   | 0.059019085  |
| 1241 | DB00661 | 0.9413986  | 0.058601376  |
| 1242 | DB11296 | 0.9417756  | 0.058242455  |
| 1243 | DB11766 | 0.9419706  | 0.05802917   |
| 1244 | DB14656 | 0.9424028  | 0.05759724   |
| 1245 | DB01016 | 0.9426454  | 0.057354547  |
| 1246 | DB11700 | 0.94285804 | 0.057142008  |
| 1247 | DB11738 | 0.9429937  | 0.05700625   |
| 1248 | DB00106 | 0.9430304  | 0.05685697   |
| 1249 | DB01409 | 0.94310004 | 0.05689942   |
| 1250 | DB00470 | 0.9434477  | 0.056552283  |
| 1251 | DB00559 | 0.94354546 | 0.05645455   |
| 1252 | DB15465 | 0.94366795 | 0.05633206   |
| 1253 | DB15926 | 0.9437341  | 0.056265846  |
| 1254 | DB01298 | 0.94414824 | 0.05588172   |
| 1255 | DB04837 | 0.9445665  | 0.055433486  |
| 1256 | DB13925 | 0.9445825  | 0.05541749   |
| 1257 | DB03310 | 0.945135   | 0.05486502   |
| 1258 | DB14529 | 0.9460294  | 0.05396084   |
| 1259 | DB00359 | 0.94624555 | 0.053754438  |
| 1260 | DB00275 | 0.9462727  | 0.053727277  |
| 1261 | DB00263 | 0.9464278  | 0.05357222   |
| 1262 | DB13985 | 0.946602   | 0.053397954  |
| 1263 | DB00891 | 0.9466036  | 0.053365575  |
| 1264 | DB09885 | 0.9467857  | 0.053214412  |
| 1265 | DB09333 | 0.94688493 | 0.053115036  |
| 1266 | DB14086 | 0.9471178  | 0.05288224   |
| 1267 | DB02530 | 0.9472052  | 0.052794848  |
| 1268 | DB00256 | 0.9472557  | 0.052744366  |
| 1269 | DB09689 | 0.947397   | 0.052603044  |
| 1270 | DB00780 | 0.9476025  | 0.05239783   |
| 1271 | DB00789 | 0.9477065  | 0.052293457  |
| 1272 | DB03088 | 0.9477186  | 0.05228143   |
| 1273 | DB00210 | 0.9477804  | 0.05221957   |
| 1274 | DB08814 | 0.94819003 | 0.051809892  |
| 1275 | DB14185 | 0.9487654  | 0.051223475  |
| 1276 | DB04412 | 0.9488051  | 0.05109485   |
| 1277 | DB00474 | 0.949045   | 0.050954953  |
| 1278 | DB06150 | 0.9492031  | 0.05079687   |
| 1279 | DB08797 | 0.94926226 | 0.05073772   |
| 1280 | DB00734 | 0.9496124  | 0.05038756   |
| 1281 | DB01215 | 0.9497211  | 0.05027897   |
| 1282 | DB00647 | 0.9498885  | 0.05011143   |
| 1283 | DB01148 | 0.95014155 | 0.049858388  |
| 1284 | DB04224 | 0.9504029  | 0.049597032  |
| 1285 | DB14975 | 0.9504796  | 0.049520414  |
| 1286 | DB00253 | 0.9505326  | 0.04938873   |
| 1287 | DB06837 | 0.951035   | 0.04868507   |
| 1288 | DB00575 | 0.95121974 | 0.048780296  |
| 1289 | DB01575 | 0.9515521  | 0.048447963  |
| 1290 | DB06292 | 0.95181465 | 0.048185386  |
| 1291 | DB00843 | 0.9519892  | 0.048010652  |
| 1292 | DB14512 | 0.9521282  | 0.0478118    |
| 1293 | DB14541 | 0.95267606 | 0.047323897  |
| 1294 | DB12537 | 0.9527358  | 0.047264162  |
| 1295 | DB00795 | 0.95277476 | 0.047252248  |
| 1296 | DB01190 | 0.9529494  | 0.04705052   |
| 1297 | DB09501 | 0.952987   | 0.047012885  |
| 1298 | DB01624 | 0.9532046  | 0.046785484  |
| 1299 | DB00532 | 0.95325166 | 0.04674838   |
| 1300 | DB11256 | 0.95327127 | 0.04672874   |
| 1301 | DB15690 | 0.9534071  | 0.046592858  |
| 1302 | DB13615 | 0.9532536  | 0.046543655  |
| 1303 | DB00769 | 0.95457166 | 0.04542826   |
| 1304 | DB00424 | 0.95467424 | 0.045325793  |
| 1305 | DB11581 | 0.9546868  | 0.0453131    |
| 1306 | DB09335 | 0.9554747  | 0.044525385  |
| 1307 | DB06774 | 0.95585126 | 0.04414873   |
| 1308 | DB09887 | 0.95618055 | 0.0438363676 |
| 1309 | DB01131 | 0.95646125 | 0.04353587   |
| 1310 | DB00420 | 0.9566791  | 0.043320898  |
| 1311 | DB01362 | 0.9568667  | 0.04313337   |
| 1312 | DB09395 | 0.956899   | 0.043101065  |
| 1313 | DB01192 | 0.9570658  | 0.04293417   |
| 1314 | DB01144 | 0.9573904  | 0.042869565  |
| 1315 | DB00549 | 0.9574727  | 0.042527268  |
| 1316 | DB00174 | 0.95747566 | 0.04252431   |
| 1317 | DB13595 | 0.95753905 | 0.04244098   |
| 1318 | DB03796 | 0.9582888  | 0.041711245  |
| 1319 | DB00289 | 0.95866716 | 0.04173269   |
| 1320 | DB00886 | 0.9588261  | 0.04117805   |
| 1321 | DB00835 | 0.95887715 | 0.041122854  |
| 1322 | DB00442 | 0.95919836 | 0.04080165   |
| 1323 | DB01023 | 0.9595179  | 0.040482093  |
| 1324 | DB01274 | 0.9597138  | 0.040286183  |
| 1325 | DB01208 | 0.9599881  | 0.040001914  |
| 1326 | DB14543 | 0.96001476 | 0.039985225  |
| 1327 | DB00763 | 0.96004057 | 0.03995946   |
| 1328 | DB14545 | 0.9600955  | 0.03990453   |
| 1329 | DB00980 | 0.9603091  | 0.039690934  |
| 1330 | DB00254 | 0.9605388  | 0.03944124   |
| 1331 | DB01399 | 0.9607202  | 0.03922797   |
| 1332 | DB01142 | 0.96095514 | 0.039044876  |
| 1333 | DB00265 | 0.96127427 | 0.038725674  |
| 1334 | DB00719 | 0.9612922  | 0.038707744  |
| 1335 | DB11073 | 0.96142334 | 0.038576644  |
| 1336 | DB09692 | 0.9614642  | 0.038335748  |
| 1337 | DB04953 | 0.9615852  | 0.03804904   |
| 1338 | DB11164 | 0.9618878  | 0.03811222   |
| 1339 | DB00553 | 0.9621228  | 0.037877273  |
| 1340 | DB06277 | 0.96220213 | 0.037797842  |
| 1341 | DB00934 | 0.9626201  | 0.037479824  |
| 1342 | DB11821 | 0.9629137  | 0.03712886   |
| 1343 | DB11842 | 0.96367204 | 0.03632796   |
| 1344 | DB01194 | 0.9639215  | 0.03606856   |
| 1345 | DB00222 | 0.9640875  | 0.035912547  |
| 1346 | DB01203 | 0.964116   | 0.035884697  |
| 1347 | DB11246 | 0.964147   | 0.035830017  |
| 1348 | DB00186 | 0.96434236 | 0.03565764   |
| 1349 | DB00199 | 0.9644127  | 0.035587285  |
| 1350 | DB00450 | 0.9647218  | 0.035278253  |
| 1351 | DB00231 | 0.9647948  | 0.035205234  |
| 1352 | DB09049 | 0.9650536  | 0.034946375  |
| 1353 | DB00691 | 0.9651199  | 0.034880083  |
| 1354 | DB00323 | 0.96513325 | 0.034866754  |
| 1355 | DB14284 | 0.96515155 | 0.034848467  |
| 1356 | DB00248 | 0.9652124  | 0.034787532  |
| 1357 | DB11735 | 0.96564686 | 0.034353204  |
| 1358 | DB00459 | 0.9658112  | 0.03418882   |
| 1359 | DB01157 | 0.96592295 | 0.034077037  |
| 1360 | DB01153 | 0.96595144 | 0.03404862   |

|      |          |            |             |
|------|----------|------------|-------------|
| 1361 | DB13867  | 0.9660107  | 0.033989277 |
| 1362 | DB14273  | 0.96632815 | 0.03376085  |
| 1363 | DB08876  | 0.9668076  | 0.03392787  |
| 1364 | DB00306  | 0.9669749  | 0.033025105 |
| 1365 | DB00723  | 0.9680589  | 0.031941142 |
| 1366 | DB09293  | 0.96817535 | 0.031824633 |
| 1367 | DB06764  | 0.96829075 | 0.031109254 |
| 1368 | DB00146  | 0.9683543  | 0.031456886 |
| 1369 | DB08895  | 0.9685619  | 0.031438123 |
| 1370 | DB14197  | 0.96858245 | 0.031117664 |
| 1371 | DB01427  | 0.9688311  | 0.031168904 |
| 1372 | DB04896  | 0.9688523  | 0.031147655 |
| 1373 | DB14513  | 0.9689837  | 0.031106236 |
| 1374 | DB09883  | 0.9691574  | 0.030842384 |
| 1375 | DB09343  | 0.9691928  | 0.030807212 |
| 1376 | DB00642  | 0.9692187  | 0.030781295 |
| 1377 | DB00394  | 0.96922183 | 0.030778166 |
| 1378 | DB09054  | 0.96937513 | 0.0306248   |
| 1379 | DB13801  | 0.9693786  | 0.03062136  |
| 1380 | DB09069  | 0.9697954  | 0.030204555 |
| 1381 | DB11207  | 0.9699915  | 0.030008506 |
| 1382 | DB02701  | 0.9700412  | 0.029958807 |
| 1383 | DB00454  | 0.9703157  | 0.029844354 |
| 1384 | DB13943  | 0.9703195  | 0.029805556 |
| 1385 | DB01388  | 0.97035104 | 0.029648965 |
| 1386 | DB00595  | 0.9704362  | 0.029563801 |
| 1387 | DB09462  | 0.9705396  | 0.029460397 |
| 1388 | DB14143  | 0.970786   | 0.029214026 |
| 1389 | DB00562  | 0.9708913  | 0.029107831 |
| 1390 | DB00241  | 0.9710278  | 0.028972274 |
| 1391 | DB00979  | 0.97112983 | 0.028870137 |
| 1392 | DB11703  | 0.9713624  | 0.028637543 |
| 1393 | DB11760  | 0.97142065 | 0.02857933  |
| 1394 | DB01080  | 0.9715124  | 0.028487615 |
| 1395 | DB00561  | 0.97157085 | 0.028429404 |
| 1396 | DB11221  | 0.9716006  | 0.02833642  |
| 1397 | DB12924  | 0.971855   | 0.028145017 |
| 1398 | DB08976  | 0.97213316 | 0.027866859 |
| 1399 | DB01182  | 0.97221786 | 0.02778214  |
| 1400 | DB00838  | 0.972218   | 0.02778204  |
| 1401 | DB00710  | 0.9724433  | 0.027586755 |
| 1402 | DB00303  | 0.97254026 | 0.02745971  |
| 1403 | DB00545  | 0.9726044  | 0.027395578 |
| 1404 | DB00423  | 0.9730801  | 0.026919885 |
| 1405 | DB00892  | 0.9734654  | 0.0265346   |
| 1406 | DB00694  | 0.97350533 | 0.026496496 |
| 1407 | DB01147  | 0.9735942  | 0.026335815 |
| 1408 | DB006290 | 0.97360283 | 0.026397146 |
| 1409 | DB00969  | 0.97364014 | 0.026335987 |
| 1410 | DB08329  | 0.973705   | 0.02629498  |
| 1411 | DB11085  | 0.973945   | 0.026054973 |
| 1412 | DB11174  | 0.974248   | 0.025765141 |
| 1413 | DB09425  | 0.9745285  | 0.02547149  |
| 1414 | DB06784  | 0.9745318  | 0.025468191 |
| 1415 | DB00791  | 0.9746113  | 0.025388695 |
| 1416 | DB12492  | 0.9746445  | 0.025355566 |
| 1417 | DB14528  | 0.9746426  | 0.025350804 |
| 1418 | DB14703  | 0.9748355  | 0.025154486 |
| 1419 | DB14725  | 0.97504723 | 0.024962758 |
| 1420 | DB00350  | 0.9752584  | 0.024741556 |
| 1421 | DB06712  | 0.9756704  | 0.024329636 |
| 1422 | DB00819  | 0.9759844  | 0.024016385 |
| 1423 | DB00936  | 0.9760952  | 0.023994795 |
| 1424 | DB06414  | 0.9761163  | 0.023883712 |
| 1425 | DB11359  | 0.9763812  | 0.023618827 |
| 1426 | DB00371  | 0.9764436  | 0.023556892 |
| 1427 | DB00259  | 0.97653145 | 0.02346862  |
| 1428 | DB03147  | 0.9768887  | 0.02317122  |
| 1429 | DB01291  | 0.976894   | 0.02315867  |
| 1430 | DB09364  | 0.977029   | 0.022970963 |
| 1431 | DB00169  | 0.97703075 | 0.022966924 |
| 1432 | DB06206  | 0.9772586  | 0.022741452 |
| 1433 | DB14596  | 0.9774705  | 0.022524964 |
| 1434 | DB00530  | 0.9774763  | 0.022524996 |
| 1435 | DB00816  | 0.97748715 | 0.022512872 |
| 1436 | DB06815  | 0.9777089  | 0.022291197 |
| 1437 | DB00589  | 0.97783625 | 0.022163747 |
| 1438 | DB00214  | 0.97785395 | 0.022146052 |
| 1439 | DB00422  | 0.9781004  | 0.021899516 |
| 1440 | DB12808  | 0.9784716  | 0.021528479 |
| 1441 | DB19880  | 0.9785735  | 0.021426525 |
| 1442 | DB00829  | 0.97863364 | 0.021366345 |
| 1443 | DB01251  | 0.9788079  | 0.021192102 |
| 1444 | DB01000  | 0.97883877 | 0.021141302 |
| 1445 | DB09650  | 0.9788654  | 0.021131394 |
| 1446 | DB00706  | 0.9789271  | 0.021072991 |
| 1447 | DB16022  | 0.9789271  | 0.021072932 |
| 1448 | DB01623  | 0.97893816 | 0.021061813 |
| 1449 | DB14184  | 0.97923    | 0.020770064 |
| 1450 | DB01255  | 0.9792467  | 0.02075331  |
| 1451 | DB09038  | 0.9794465  | 0.020630318 |
| 1452 | DB00240  | 0.9794205  | 0.020579495 |
| 1453 | DB01130  | 0.9795449  | 0.020455128 |
| 1454 | DB00301  | 0.97958404 | 0.020416021 |
| 1455 | DB13982  | 0.97968397 | 0.020335961 |
| 1456 | DB01120  | 0.9798113  | 0.020188863 |
| 1457 | DB04898  | 0.97992206 | 0.020027958 |
| 1458 | DB11496  | 0.98005795 | 0.019942041 |
| 1459 | DB14753  | 0.98023754 | 0.019762482 |
| 1460 | DB00241  | 0.9803627  | 0.019637287 |
| 1461 | DB00405  | 0.9804513  | 0.019548751 |
| 1462 | DB14489  | 0.98047847 | 0.019521484 |
| 1463 | DB06762  | 0.9805815  | 0.019418541 |
| 1464 | DB06351  | 0.9807678  | 0.01923224  |
| 1465 | DB00183  | 0.98086286 | 0.019137114 |
| 1466 | DB01764  | 0.9809871  | 0.019012658 |
| 1467 | DB01264  | 0.9809879  | 0.01901286  |
| 1468 | DB09089  | 0.9810539  | 0.018946122 |
| 1469 | DB00514  | 0.9811694  | 0.018830575 |
| 1470 | DB00179  | 0.9812122  | 0.018787779 |
| 1471 | DB00974  | 0.9812624  | 0.018737616 |
| 1472 | DB01187  | 0.9812675  | 0.018732274 |
| 1473 | DB12931  | 0.98137766 | 0.018622413 |
| 1474 | DB14200  | 0.98140854 | 0.01859152  |
| 1475 | DB01204  | 0.9814736  | 0.018526396 |
| 1476 | DB12127  | 0.9815963  | 0.018403754 |
| 1477 | DB01150  | 0.9816096  | 0.018390402 |
| 1478 | DB00962  | 0.98180205 | 0.018197639 |
| 1479 | DB08964  | 0.9820356  | 0.017964358 |
| 1480 | DB13125  | 0.98209226 | 0.01790769  |
| 1481 | DB00415  | 0.9822305  | 0.017769517 |
| 1482 | DB01149  | 0.9822441  | 0.017755874 |
| 1483 | DB01495  | 0.98226544 | 0.017733657 |
| 1484 | DB00138  | 0.9824355  | 0.017662987 |
| 1485 | DB19657  | 0.98248154 | 0.017518444 |
| 1486 | DB04843  | 0.9825554  | 0.017444551 |
| 1487 | DB01608  | 0.9827571  | 0.017242882 |
| 1488 | DB00136  | 0.98288625 | 0.01711368  |
| 1489 | DB00498  | 0.9830976  | 0.016932396 |
| 1490 | DB01170  | 0.98325515 | 0.016744289 |
| 1491 | DB00830  | 0.9832622  | 0.016737804 |
| 1492 | DB00409  | 0.98331165 | 0.01668831  |
| 1493 | DB00743  | 0.9833203  | 0.01667969  |
| 1494 | DB00340  | 0.9833372  | 0.016668276 |
| 1495 | DB00820  | 0.9833836  | 0.016616438 |
| 1496 | DB00897  | 0.983448   | 0.01655203  |
| 1497 | DB09382  | 0.98351616 | 0.01648383  |
| 1498 | DB11590  | 0.98359793 | 0.016402118 |
| 1499 | DB00324  | 0.9836938  | 0.016306257 |
| 1500 | DB01106  | 0.983725   | 0.016275018 |
| 1501 | DB00756  | 0.98385173 | 0.01614828  |
| 1502 | DB06249  | 0.9840645  | 0.015935406 |

|      |          |            |             |
|------|----------|------------|-------------|
| 1503 | DB01406  | 0.9841278  | 0.015872207 |
| 1504 | DB00368  | 0.984261   | 0.015749607 |
| 1505 | DB01448  | 0.9843224  | 0.0157076   |
| 1506 | DB09060  | 0.98436487 | 0.015635097 |
| 1507 | DB09083  | 0.9843795  | 0.015620514 |
| 1508 | DB00869  | 0.9844067  | 0.015593233 |
| 1509 | DB04465  | 0.98442036 | 0.015579999 |
| 1510 | DB00330  | 0.98452246 | 0.015477333 |
| 1511 | DB00333  | 0.98465246 | 0.015347473 |
| 1512 | DB08875  | 0.985089   | 0.014910992 |
| 1513 | DB06824  | 0.9850994  | 0.014900802 |
| 1514 | DB00555  | 0.98541534 | 0.014584731 |
| 1515 | DB09257  | 0.9855223  | 0.01447514  |
| 1516 | DB00799  | 0.9855697  | 0.014339801 |
| 1517 | DB01057  | 0.9856097  | 0.014390221 |
| 1518 | DB08828  | 0.9856205  | 0.01437947  |
| 1519 | DB09072  | 0.9857283  | 0.014271742 |
| 1520 | DB01576  | 0.98583835 | 0.014161678 |
| 1521 | DB00953  | 0.9859365  | 0.01404936  |
| 1522 | DB01158  | 0.9861835  | 0.013816491 |
| 1523 | DB09095  | 0.98622316 | 0.013776848 |
| 1524 | DB08971  | 0.9864101  | 0.013589907 |
| 1525 | DB00255  | 0.98645556 | 0.013544472 |
| 1526 | DB09914  | 0.986498   | 0.013501979 |
| 1527 | DB01010  | 0.98651    | 0.013389982 |
| 1528 | DB13854  | 0.98674613 | 0.013253937 |
| 1529 | DB08799  | 0.9868085  | 0.013191576 |
| 1530 | DB00572  | 0.98686814 | 0.013131859 |
| 1531 | DB12945  | 0.98689693 | 0.013103037 |
| 1532 | DB00354  | 0.98692596 | 0.013074084 |
| 1533 | DB00727  | 0.9870099  | 0.012990138 |
| 1534 | DB12754  | 0.98737913 | 0.012820861 |
| 1535 | DB00357  | 0.98741037 | 0.012858613 |
| 1536 | DB00513  | 0.9874493  | 0.012550747 |
| 1537 | DB14540  | 0.9874516  | 0.012548418 |
| 1538 | DB14375  | 0.98745626 | 0.012543862 |
| 1539 | DB00316  | 0.987468   | 0.012531919 |
| 1540 | DB00590  | 0.98756963 | 0.012430411 |
| 1541 | DB00218  | 0.987586   | 0.012414031 |
| 1542 | DB00225  | 0.98759504 | 0.012404039 |
| 1543 | DB13285  | 0.9876188  | 0.012381161 |
| 1544 | DB00374  | 0.987648   | 0.012352048 |
| 1545 | DB00336  | 0.9877649  | 0.012235166 |
| 1546 | DB14498  | 0.9880266  | 0.011973378 |
| 1547 | DB00659  | 0.98817945 | 0.011820565 |
| 1548 | DB00356  | 0.9882019  | 0.011798981 |
| 1549 | DB01216  | 0.9882938  | 0.011714001 |
| 1550 | DB001202 | 0.988371   | 0.011628964 |
| 1551 | DB01107  | 0.9885388  | 0.011461128 |
| 1552 | DB09212  | 0.9885436  | 0.011456446 |
| 1553 | DB11880  | 0.98862445 | 0.011375542 |
| 1554 | DB00445  | 0.98876816 | 0.011312833 |
| 1555 | DB00957  | 0.9888207  | 0.011175291 |
| 1556 | DB09292  | 0.98892796 | 0.011072018 |
| 1557 | DB00749  | 0.988972   | 0.011028025 |
| 1558 | DB11217  | 0.9891468  | 0.010853132 |
| 1559 | DB06998  | 0.98923104 | 0.010779099 |
| 1560 | DB08950  | 0.9892436  | 0.010756335 |
| 1561 | DB08880  | 0.9893551  | 0.010644905 |
| 1562 | DB00128  | 0.9893861  | 0.010613955 |
| 1563 | DB00946  | 0.9893863  | 0.010613699 |
| 1564 | DB00207  | 0.9894582  | 0.010541832 |
| 1565 | DB00209  | 0.9894981  | 0.010511937 |
| 1566 | DB01403  | 0.9895159  | 0.010484168 |
| 1567 | DB00704  | 0.9895453  | 0.010454666 |
| 1568 | DB01333  | 0.9895454  | 0.010454628 |
| 1569 | DB06715  | 0.98955625 | 0.010443687 |
| 1570 | DB00413  | 0.9896493  | 0.010350704 |
| 1571 | DB11290  | 0.9897029  | 0.010286768 |
| 1572 | DB14499  | 0.989711   | 0.010289039 |
| 1573 | DB11274  | 0.9897253  | 0.010224673 |
| 1574 | DB01263  | 0.9898552  | 0.0101448   |
| 1575 | DB00431  | 0.98987105 | 0.010122979 |
| 1576 | DB00711  | 0.9899186  | 0.010065132 |
| 1577 | DB02203  | 0.9899407  | 0.010059342 |
| 1578 | DB06654  | 0.9900663  | 0.009933679 |
| 1579 | DB00287  | 0.99010533 | 0.009894709 |
| 1580 | DB00660  | 0.9901725  | 0.009827424 |
| 1581 | DB11672  | 0.9902312  | 0.009788763 |
| 1582 | DB00278  | 0.99023646 | 0.009763561 |
| 1583 | DB01015  | 0.99026793 | 0.009732121 |
| 1584 | DB06016  | 0.9902838  | 0.009716209 |
| 1585 | DB08911  | 0.990308   | 0.009691949 |
| 1586 | DB09266  | 0.99034834 | 0.009651857 |
| 1587 | DB07565  | 0.9903797  | 0.009620535 |
| 1588 | DB15444  | 0.99039465 | 0.009605309 |
| 1589 | DB00904  | 0.9904545  | 0.009545482 |
| 1590 | DB00924  | 0.9905281  | 0.009471964 |
| 1591 | DB15793  | 0.9906759  | 0.009324048 |
| 1592 | DB09297  | 0.99074133 | 0.009238829 |
| 1593 | DB06605  | 0.99078526 | 0.009217487 |
| 1594 | DB01068  | 0.99081975 | 0.009180304 |
| 1595 | DB00487  | 0.99085534 | 0.009144697 |
| 1596 | DB01301  | 0.99088424 | 0.009115777 |
| 1597 | DB11880  | 0.9908961  | 0.009113848 |
| 1598 | DB00982  | 0.9909274  | 0.009042808 |
| 1599 | DB01013  | 0.9909582  | 0.009041796 |
| 1600 | DB06995  | 0.9910046  | 0.008995476 |
| 1601 | DB00490  | 0.99105597 | 0.008943988 |
| 1602 | DB00067  | 0.99117744 | 0.008822615 |
| 1603 | DB14048  | 0.9911787  | 0.008821351 |
| 1604 | DB01169  | 0.9911927  | 0.00881574  |
| 1605 | DB14507  | 0.99122435 | 0.008775849 |
| 1606 | DB13981  | 0.9912402  | 0.008759869 |
| 1607 | DB01044  | 0.9912683  | 0.008731679 |
| 1608 | DB11827  | 0.99127136 | 0.008728478 |
| 1609 | DB00818  | 0.9913128  | 0.008687131 |
| 1610 | DB00809  | 0.9913635  | 0.008636458 |
| 1611 | DB00467  | 0.991385   | 0.008615002 |
| 1612 | DB00135  | 0.9913924  | 0.008607633 |
| 1613 | DB00291  | 0.99139833 | 0.008601638 |
| 1614 | DB09620  | 0.9914069  | 0.008593115 |
| 1615 | DB00282  | 0.99172467 | 0.008275409 |
| 1616 | DB00319  | 0.9917271  | 0.00827287  |
| 1617 | DB01278  | 0.99173886 | 0.008261156 |
| 1618 | DB12952  | 0.99175185 | 0.008248189 |
| 1619 | DB00750  | 0.99176544 | 0.008234501 |
| 1620 | DB00920  | 0.99182105 | 0.008178974 |
| 1621 | DB00970  | 0.99189043 | 0.008109544 |
| 1622 | DB06412  | 0.99189633 | 0.008103724 |
| 1623 | DB11660  | 0.9919384  | 0.008061633 |
| 1624 | DB14006  | 0.99195695 | 0.008043024 |
| 1625 | DB00997  | 0.9920065  | 0.007994889 |
| 1626 | DB00427  | 0.9920739  | 0.007929884 |
| 1627 | DB11730  | 0.9920846  | 0.00791536  |
| 1628 | DB11613  | 0.9921583  | 0.007801713 |
| 1629 | DB00162  | 0.9922586  | 0.007741334 |
| 1630 | DB01242  | 0.99227285 | 0.007727202 |
| 1631 | DB11712  | 0.99237144 | 0.007628863 |
| 1632 | DB04842  | 0.9923775  | 0.007622432 |
| 1633 | DB01104  | 0.9924331  | 0.007566896 |
| 1634 | DB00982  | 0.9924334  | 0.007566825 |
| 1635 | DB00772  | 0.9924346  | 0.007565461 |
| 1636 | DB09076  | 0.9924388  | 0.007551216 |
| 1637 | DB09210  | 0.9924407  | 0.007550284 |
| 1638 | DB14542  | 0.9924569  | 0.007543132 |
| 1639 | DB00434  | 0.99255264 | 0.007447365 |
| 1640 | DB01160  | 0.9925557  | 0.007444373 |
| 1641 | DB00200  | 0.992564   | 0.00738656  |
| 1642 | DB14631  | 0.9925914  | 0.007340857 |
| 1643 | DB01028  | 0.9926224  | 0.007377672 |
| 1644 | DB08987  | 0.9926239  | 0.007376048 |

|      |         |            |             |
|------|---------|------------|-------------|
| 1645 | DB01407 | 0.9926334  | 0.00736661  |
| 1646 | DB01228 | 0.9927045  | 0.00736509  |
| 1647 | DB00381 | 0.9927791  | 0.00721863  |
| 1648 | DB00598 | 0.992788   | 0.00721966  |
| 1649 | DB00932 | 0.9928013  | 0.00719863  |
| 1650 | DB00873 | 0.9928084  | 0.00719109  |
| 1651 | DB00768 | 0.99283946 | 0.007160493 |
| 1652 | DB00480 | 0.9930114  | 0.00698333  |
| 1653 | DB01365 | 0.9930306  | 0.00696946  |
| 1654 | DB11104 | 0.993067   | 0.006932937 |
| 1655 | DB06230 | 0.9931051  | 0.006894922 |
| 1656 | DB00881 | 0.99314946 | 0.006850551 |
| 1657 | DB11327 | 0.9932037  | 0.006797409 |
| 1658 | DB00730 | 0.9932296  | 0.00679363  |
| 1659 | DB09332 | 0.9932335  | 0.006766475 |
| 1660 | DB13520 | 0.99323605 | 0.006760962 |
| 1661 | DB06716 | 0.9932702  | 0.0067298   |
| 1662 | DB13218 | 0.99339916 | 0.006530815 |
| 1663 | DB01353 | 0.9934043  | 0.006565658 |
| 1664 | DB01058 | 0.9934297  | 0.006570335 |
| 1665 | DB06781 | 0.99359506 | 0.006405002 |
| 1666 | DB06211 | 0.99367684 | 0.006323155 |
| 1667 | DB04845 | 0.99368083 | 0.006319102 |
| 1668 | DB14173 | 0.99368315 | 0.006317863 |
| 1669 | DB01222 | 0.99375015 | 0.006245843 |
| 1670 | DB14019 | 0.9939213  | 0.006078698 |
| 1671 | DB00347 | 0.99401975 | 0.00598027  |
| 1672 | DB06714 | 0.994065   | 0.005935035 |
| 1673 | DB00494 | 0.9940899  | 0.005910055 |
| 1674 | DB11163 | 0.9941421  | 0.005875881 |
| 1675 | DB03397 | 0.99416167 | 0.005838369 |
| 1676 | DB00189 | 0.9941654  | 0.005834603 |
| 1677 | DB04821 | 0.99419326 | 0.005806773 |
| 1678 | DB01168 | 0.99420977 | 0.005790224 |
| 1679 | DB06823 | 0.9942263  | 0.005732331 |
| 1680 | DB02236 | 0.9942391  | 0.005749042 |
| 1681 | DB09494 | 0.9944147  | 0.005585294 |
| 1682 | DB00338 | 0.99442756 | 0.005572458 |
| 1683 | DB09300 | 0.9944806  | 0.005519412 |
| 1684 | DB11584 | 0.994537   | 0.00543014  |
| 1685 | DB03294 | 0.9946306  | 0.005366387 |
| 1686 | DB14632 | 0.9946601  | 0.005339937 |
| 1687 | DB09015 | 0.994695   | 0.005305035 |
| 1688 | DB11823 | 0.9947924  | 0.005207564 |
| 1689 | DB00137 | 0.9947855  | 0.005204517 |
| 1690 | DB13292 | 0.9948036  | 0.005186344 |
| 1691 | DB13074 | 0.9948127  | 0.005187303 |
| 1692 | DB01275 | 0.994826   | 0.005173954 |
| 1693 | DB00384 | 0.99486625 | 0.005133685 |
| 1694 | DB12667 | 0.99491864 | 0.005081355 |
| 1695 | DB00344 | 0.994945   | 0.005055046 |
| 1696 | DB13337 | 0.9949747  | 0.005027481 |
| 1697 | DB01619 | 0.9949797  | 0.005020273 |
| 1698 | DB14096 | 0.99502915 | 0.00497087  |
| 1699 | DB00596 | 0.9950207  | 0.004927916 |
| 1700 | DB11269 | 0.9950589  | 0.00491089  |
| 1701 | DB13206 | 0.9951019  | 0.004898079 |
| 1702 | DB11751 | 0.9951292  | 0.00487073  |
| 1703 | DB00917 | 0.99515393 | 0.004844107 |
| 1704 | DB06268 | 0.9952011  | 0.00479893  |
| 1705 | DB08934 | 0.99526983 | 0.004730149 |
| 1706 | DB00649 | 0.99531245 | 0.004687505 |
| 1707 | DB01319 | 0.9953815  | 0.004618605 |
| 1708 | DB00091 | 0.9954     | 0.004599951 |
| 1709 | DB00890 | 0.99544203 | 0.004557933 |
| 1710 | DB00237 | 0.99544805 | 0.004551899 |
| 1711 | DB14476 | 0.9954763  | 0.00452372  |
| 1712 | DB00332 | 0.99552286 | 0.004477209 |
| 1713 | DB02116 | 0.9955316  | 0.004462479 |
| 1714 | DB00192 | 0.99554175 | 0.004458269 |
| 1715 | DB01220 | 0.9955455  | 0.004454453 |
| 1716 | DB13908 | 0.9956742  | 0.004325745 |
| 1717 | DB12091 | 0.9956873  | 0.004312636 |
| 1718 | DB12278 | 0.9956933  | 0.004301636 |
| 1719 | DB01067 | 0.9957223  | 0.00427263  |
| 1720 | DB01146 | 0.9957237  | 0.004276257 |
| 1721 | DB11145 | 0.995741   | 0.004259009 |
| 1722 | DB00567 | 0.9957503  | 0.004249649 |
| 1723 | DB06704 | 0.9957547  | 0.004245346 |
| 1724 | DB01436 | 0.995765   | 0.00424349  |
| 1725 | DB01065 | 0.99576926 | 0.004230744 |
| 1726 | DB00679 | 0.9957698  | 0.004230226 |
| 1727 | DB13139 | 0.9957775  | 0.004222439 |
| 1728 | DB12095 | 0.9957896  | 0.004210455 |
| 1729 | DB00713 | 0.9958123  | 0.004165795 |
| 1730 | DB00953 | 0.9958587  | 0.00411269  |
| 1731 | DB13949 | 0.9958621  | 0.004137841 |
| 1732 | DB05013 | 0.99586725 | 0.004132716 |
| 1733 | DB15035 | 0.99587566 | 0.004124374 |
| 1734 | DB11575 | 0.9958834  | 0.004116357 |
| 1735 | DB00714 | 0.9958876  | 0.004116248 |
| 1736 | DB11119 | 0.9959091  | 0.004090903 |
| 1737 | DB00414 | 0.995915   | 0.004084953 |
| 1738 | DB06594 | 0.9959222  | 0.004077803 |
| 1739 | DB00961 | 0.9959347  | 0.004066227 |
| 1740 | DB14195 | 0.9959715  | 0.004028464 |
| 1741 | DB00578 | 0.99603856 | 0.003961384 |
| 1742 | DB04938 | 0.9960671  | 0.003932913 |
| 1743 | DB00684 | 0.9960821  | 0.003917878 |
| 1744 | DB00317 | 0.9960827  | 0.003911716 |
| 1745 | DB00867 | 0.9961139  | 0.003886962 |
| 1746 | DB09167 | 0.9961272  | 0.003872819 |
| 1747 | DB11231 | 0.9961449  | 0.00385507  |
| 1748 | DB14763 | 0.9961831  | 0.003816832 |
| 1749 | DB00165 | 0.9961909  | 0.003809124 |
| 1750 | DB00983 | 0.9963527  | 0.003646711 |
| 1751 | DB12404 | 0.9963714  | 0.003628882 |
| 1752 | DB08958 | 0.99637455 | 0.003625426 |
| 1753 | DB00579 | 0.996393   | 0.003607004 |
| 1754 | DB09009 | 0.9964042  | 0.003595885 |
| 1755 | DB00307 | 0.9964078  | 0.003592182 |
| 1756 | DB00813 | 0.9964271  | 0.003572941 |
| 1757 | DB00953 | 0.99647397 | 0.003525972 |
| 1758 | DB09342 | 0.9964812  | 0.003518816 |
| 1759 | DB01227 | 0.99649066 | 0.003509296 |
| 1760 | DB06803 | 0.9964948  | 0.003505179 |
| 1761 | DB00906 | 0.99649835 | 0.003501996 |
| 1762 | DB01267 | 0.99650925 | 0.003490718 |
| 1763 | DB01595 | 0.99651104 | 0.003489    |
| 1764 | DB00321 | 0.9965222  | 0.003477781 |
| 1765 | DB00745 | 0.996554   | 0.003446045 |
| 1766 | DB00387 | 0.9965643  | 0.003435698 |
| 1767 | DB06787 | 0.99657637 | 0.003424905 |
| 1768 | DB00564 | 0.9965829  | 0.003411796 |
| 1769 | DB13345 | 0.99661666 | 0.003383357 |
| 1770 | DB01563 | 0.99665076 | 0.00334929  |
| 1771 | DB06119 | 0.9966535  | 0.003346528 |
| 1772 | DB00349 | 0.9966665  | 0.003333537 |
| 1773 | DB01627 | 0.99672694 | 0.003273886 |
| 1774 | DB00491 | 0.9967303  | 0.00326962  |
| 1775 | DB00184 | 0.99674594 | 0.003253999 |
| 1776 | DB00868 | 0.99678457 | 0.003215416 |
| 1777 | DB14219 | 0.99683565 | 0.003164321 |
| 1778 | DB00805 | 0.99685234 | 0.003147113 |
| 1779 | DB11273 | 0.99686994 | 0.003103047 |
| 1780 | DB00617 | 0.996926   | 0.003074005 |
| 1781 | DB00428 | 0.9969363  | 0.003063622 |
| 1782 | DB09418 | 0.99693894 | 0.003061129 |
| 1783 | DB00557 | 0.9969409  | 0.003059986 |
| 1784 | DB00181 | 0.9969932  | 0.003061553 |
| 1785 | DB12911 | 0.9969983  | 0.003001706 |
| 1786 | DB00726 | 0.99700195 | 0.002998057 |

|      |         |            |             |
|------|---------|------------|-------------|
| 1787 | DB09129 | 0.9970065  | 0.002993482 |
| 1788 | DB14186 | 0.9970099  | 0.002996953 |
| 1789 | DB04838 | 0.9970208  | 0.002979199 |
| 1790 | DB04824 | 0.997033   | 0.002966953 |
| 1791 | DB00363 | 0.99704665 | 0.002955342 |
| 1792 | DB00372 | 0.99706718 | 0.002932806 |
| 1793 | DB00327 | 0.9970788  | 0.002921264 |
| 1794 | DB01607 | 0.99709    | 0.002910033 |
| 1795 | DB00050 | 0.9970927  | 0.002907273 |
| 1796 | DB00159 | 0.9971009  | 0.002899068 |
| 1797 | DB00469 | 0.997106   | 0.002893939 |
| 1798 | DB01075 | 0.99711007 | 0.002889558 |
| 1799 | DB14505 | 0.9971103  | 0.002888999 |
| 1800 | DB00933 | 0.9971154  | 0.002884911 |
| 1801 | DB11089 | 0.997168   | 0.002832054 |
| 1802 | DB00912 | 0.99717206 | 0.002828022 |
| 1803 | DB08903 | 0.9971994  | 0.002800621 |
| 1804 | DB00633 | 0.9972132  | 0.002786845 |
| 1805 | DB00811 | 0.99726737 | 0.002733919 |
| 1806 | DB13323 | 0.99730396 | 0.002696008 |
| 1807 | DB13270 | 0.997308   | 0.002691945 |
| 1808 | DB09118 | 0.99733245 | 0.002667562 |
| 1809 | DB00990 | 0.99733895 | 0.002661079 |
| 1810 | DB03175 | 0.99735403 | 0.002646616 |
| 1811 | DB01037 | 0.9973558  | 0.002644202 |
| 1812 | DB13783 | 0.99736446 | 0.002635527 |
| 1813 | DB00606 | 0.9973792  | 0.002620793 |
| 1814 | DB09070 | 0.9973839  | 0.002616102 |
| 1815 | DB00736 | 0.9974291  | 0.00257087  |
| 1816 | DB00694 | 0.9974414  | 0.002558331 |
| 1817 | DB14481 | 0.9974585  | 0.002541452 |
| 1818 | DB00665 | 0.9974717  | 0.002528379 |
| 1819 | DB00894 | 0.99747294 | 0.002527016 |
| 1820 | DB11570 | 0.99748504 | 0.002514891 |
| 1821 | DB00983 | 0.997503   | 0.002497065 |
| 1822 | DB01551 | 0.997503   | 0.00249697  |
| 1823 | DB00925 | 0.9975147  | 0.002485303 |
| 1824 | DB06153 | 0.9975283  | 0.002471285 |
| 1825 | DB09353 | 0.997529   | 0.002471083 |
| 1826 | DB00148 | 0.99753976 | 0.002460284 |
| 1827 | DB00509 | 0.9975549  | 0.002405081 |
| 1828 | DB12401 | 0.9976611  | 0.002338845 |
| 1829 | DB00187 | 0.99767023 | 0.002329751 |
| 1830 | DB00943 | 0.99768543 | 0.002314523 |
| 1831 | DB06797 | 0.99768953 | 0.002311432 |
| 1832 | DB00346 | 0.9976994  | 0.002300949 |
| 1833 | DB00534 | 0.9976999  | 0.002300078 |
| 1834 | DB00895 | 0.99770564 | 0.002294338 |
| 1835 | DB00898 | 0.99773204 | 0.002267882 |
| 1836 | DB09056 | 0.9977447  | 0.002255353 |
| 1837 | DB00223 | 0.9977527  | 0.002247315 |
| 1838 | DB00439 | 0.9977557  | 0.002244335 |
| 1839 | DB00246 | 0.9977691  | 0.002230906 |
| 1840 | DB08868 | 0.99779874 | 0.002201201 |
| 1841 | DB13966 | 0.9978065  | 0.002193474 |
| 1842 | DB00436 | 0.9978238  | 0.002186209 |
| 1843 | DB00664 | 0.9978477  | 0.002172026 |
| 1844 | DB01601 | 0.99788517 | 0.002144729 |
| 1845 | DB04657 | 0.99789834 | 0.002101603 |
| 1846 | DB06777 | 0.997979   | 0.00202107  |
| 1847 | DB01246 | 0.99798065 | 0.002019362 |
| 1848 | DB00810 | 0.9979914  | 0.002018536 |
| 1849 | DB00847 | 0.9979937  | 0.002009647 |
| 1850 | DB00800 | 0.9980001  | 0.00199986  |
| 1851 | DB01174 | 0.99802953 | 0.001970406 |
| 1852 | DB01708 | 0.99803156 | 0.001968388 |
| 1853 | DB00266 | 0.99804807 | 0.001951903 |
| 1854 | DB01443 | 0.9980531  | 0.001946895 |
| 1855 | DB00016 | 0.9980606  | 0.001934935 |
| 1856 | DB09512 | 0.9980872  | 0.001912704 |
| 1857 | DB00993 | 0.9981256  | 0.001887417 |
| 1858 | DB01241 | 0.998116   | 0.001884044 |
| 1859 | DB00980 | 0.9981402  | 0.001859822 |
| 1860 | DB00725 | 0.99814165 | 0.001858354 |
| 1861 | DB11978 | 0.99815804 | 0.001841962 |
| 1862 | DB00913 | 0.9981623  | 0.001837885 |
| 1863 | DB09561 | 0.99816954 | 0.00183048  |
| 1864 | DB00334 | 0.9981787  | 0.001821252 |
| 1865 | DB00983 | 0.9982217  | 0.00177828  |
| 1866 | DB01062 | 0.998223   | 0.00176947  |
| 1867 | DB11336 | 0.99825805 | 0.001741902 |
| 1868 | DB01181 | 0.9982621  | 0.001737652 |
| 1869 | DB06785 | 0.99827254 | 0.001727418 |
| 1870 | DB11072 | 0.99827523 | 0.00172723  |
| 1871 | DB01117 | 0.9982856  | 0.001713998 |
| 1872 | DB12938 | 0.99829096 | 0.001690008 |
| 1873 | DB14175 | 0.9983022  | 0.001697807 |
| 1874 | DB11182 | 0.9983028  | 0.001697172 |
| 1875 | DB00903 | 0.9983059  | 0.001694123 |
| 1876 | DB01161 | 0.9983431  | 0.001656869 |
| 1877 | DB00890 | 0.99837135 | 0.001626867 |
| 1878 | DB11911 | 0.99837565 | 0.001624303 |
| 1879 | DB00582 | 0.9983797  | 0.001620282 |
| 1880 | DB00831 | 0.9983815  | 0.001618515 |
| 1881 | DB00936 | 0.9983974  | 0.001602533 |
| 1882 | DB01378 | 0.9984016  | 0.001598428 |
| 1883 | DB14089 | 0.9984023  | 0.001597681 |
| 1884 | DB00625 | 0.9984054  | 0.001594388 |
| 1885 | DB00658 | 0.9984124  | 0.001587564 |
| 1886 | DB00283 | 0.9984127  | 0.001587285 |
| 1887 | DB01243 | 0.99842036 | 0.001579821 |
| 1888 | DB00541 | 0.9984232  | 0.001575824 |
| 1889 | DB06413 | 0.9984237  | 0.001575278 |
| 1890 | DB01262 | 0.9984333  | 0.001566473 |
| 1891 | DB11056 | 0.9984433  | 0.001556739 |
| 1892 | DB00766 | 0.99844736 | 0.001552687 |
| 1893 | DB12821 | 0.9984517  | 0.001548398 |
| 1894 | DB00724 | 0.99845254 | 0.001547425 |
| 1895 | DB01054 | 0.99847466 | 0.001525349 |
| 1896 | DB08942 | 0.9984837  | 0.001516254 |
| 1897 | DB09316 | 0.998486   | 0.001514109 |
| 1898 | DB01244 | 0.9984858  | 0.001509114 |
| 1899 | DB14533 | 0.9984995  | 0.001500491 |
| 1900 | DB00820 | 0.99853575 | 0.001464288 |
| 1901 | DB01592 | 0.9985403  | 0.00145968  |
| 1902 | DB01744 | 0.9985405  | 0.001459482 |
| 1903 | DB00328 | 0.9985524  | 0.001447602 |
| 1904 | DB09040 | 0.9985617  | 0.001438335 |
| 1905 | DB13269 | 0.9985678  | 0.001432155 |
| 1906 | DB00650 | 0.99861026 | 0.001389658 |
| 1907 | DB00899 | 0.99862003 | 0.001379928 |
| 1908 | DB00153 | 0.9986218  | 0.001378132 |
| 1909 | DB09101 | 0.9986346  | 0.001366511 |
| 1910 | DB00639 | 0.9986481  | 0.001351893 |
| 1911 | DB00270 | 0.99865484 | 0.001345171 |
| 1912 | DB01017 | 0.9986552  | 0.001344743 |
| 1913 | DB00777 | 0.9986658  | 0.001334165 |
| 1914 | DB14539 | 0.99867505 | 0.001324866 |
| 1915 | DB02789 | 0.9986902  | 0.001309866 |
| 1916 | DB01232 | 0.998723   | 0.001277002 |
| 1917 | DB09019 | 0.9987244  | 0.001275527 |
| 1918 | DB00877 | 0.99872977 | 0.001270191 |
| 1919 | DB00279 | 0.9987451  | 0.00125485  |
| 1920 | DB00782 | 0.99874794 | 0.001252941 |
| 1921 | DB00526 | 0.9987539  | 0.001244741 |
| 1922 | DB01230 | 0.9987571  | 0.001242859 |
| 1923 | DB13268 | 0.9987612  | 0.001238823 |
| 1924 | DB00893 | 0.99876547 | 0.001234543 |
| 1925 | DB00735 | 0.9987785  | 0.001221449 |
| 1926 | DB01240 | 0.9987892  | 0.001211872 |
| 1927 | DB01018 | 0.9987986  | 0.001201324 |
| 1928 | DB01956 | 0.9988067  | 0.001193289 |

|      |         |            |             |
|------|---------|------------|-------------|
| 1929 | DB09102 | 0.9988092  | 0.001190836 |
| 1930 | DB09495 | 0.9988128  | 0.00118721  |
| 1931 | DB08903 | 0.9988263  | 0.001174923 |
| 1932 | DB00325 | 0.99883145 | 0.001168968 |
| 1933 | DB09034 | 0.99884115 | 0.001155868 |
| 1934 | DB00391 | 0.9988502  | 0.001149789 |
| 1935 | DB11285 | 0.99885935 | 0.001149586 |
| 1936 | DB15566 | 0.99886763 | 0.001132421 |
| 1937 | DB11123 | 0.9988782  | 0.00112182  |
| 1938 | DB00504 | 0.99888045 | 0.001119493 |
| 1939 | DB00780 | 0.99888736 | 0.00112895  |
| 1940 | DB06595 | 0.99889416 | 0.001105892 |
| 1941 | DB00203 | 0.9988967  | 0.001103273 |
| 1942 | DB00987 | 0.9989272  | 0.001072855 |
| 1943 | DB00163 | 0.9989409  | 0.001059098 |
| 1944 | DB12499 | 0.99894315 | 0.001056825 |
| 1945 | DB01197 | 0.998946   | 0.001053958 |
| 1946 | DB14187 | 0.9989524  | 0.001047545 |
| 1947 | DB00378 | 0.9989579  | 0.001042076 |
| 1948 | DB01604 | 0.99896    | 0.00103999  |
| 1949 | DB01166 | 0.998961   | 0.001039026 |
| 1950 | DB04868 | 0.9989637  | 0.001036311 |
| 1951 | DB00285 | 0.9989755  | 0.001024524 |
| 1952 | DB06217 | 0.99897563 | 0.001024338 |
| 1953 | DB09298 | 0.9989814  | 0.001018381 |
| 1954 | DB02659 | 0.99898726 | 0.001012697 |
| 1955 | DB01042 | 0.9989926  | 0.001007326 |
| 1956 | DB08967 | 0.9989988  | 0.001001159 |
| 1957 | DB00576 | 0.9990036  | 0.000991587 |
| 1958 | DB01097 | 0.9990216  | 0.000975423 |
| 1959 | DB00392 | 0.99902856 | 0.000971472 |
| 1960 | DB00992 | 0.9990299  | 0.000970095 |
| 1961 | DB14500 | 0.99903154 | 0.00096843  |
| 1962 | DB00618 | 0.9990533  | 0.000946755 |
| 1963 | DB14104 | 0.9990544  | 0.000945584 |
| 1964 | DB00793 | 0.9990567  | 0.000943035 |
| 1965 | DB00918 | 0.9990709  | 0.000929088 |
| 1966 | DB00458 | 0.9990722  | 0.00092783  |
| 1967 | DB00358 | 0.9990736  | 0.000926328 |
| 1968 | DB00815 | 0.99907434 | 0.000925821 |
| 1969 | DB01294 | 0.99907894 | 0.000923087 |
| 1970 | DB00221 | 0.9990983  | 0.000901721 |
| 1971 | DB06262 | 0.9990988  | 0.000901222 |
| 1972 | DB12838 | 0.99911755 | 0.000882453 |
| 1973 | DB00975 | 0.9991179  | 0.000882091 |
| 1974 | DB00761 | 0.9991203  | 0.000879744 |
| 1975 | DB00677 | 0.9991286  | 0.000870382 |
| 1976 | DB00796 | 0.9991333  | 0.000866779 |
| 1977 | DB00503 | 0.9991215  | 0.000828582 |
| 1978 | DB11994 | 0.99918944 | 0.000810535 |
| 1979 | DB09536 | 0.9991916  | 0.000808327 |
| 1980 | DB01267 | 0.9991967  | 0.00080354  |
| 1981 | DB00871 | 0.9991973  | 0.000802729 |
| 1982 | DB01012 | 0.9992091  | 0.00079094  |
| 1983 | DB01118 | 0.99921095 | 0.000789045 |
| 1984 | DB00175 | 0.9992143  | 0.000785448 |
| 1985 | DB00759 | 0.9992305  | 0.000779183 |
| 1986 | DB00945 | 0.99923097 | 0.000779049 |
| 1987 | DB00722 | 0.9992321  | 0.000776862 |
| 1988 | DB12466 | 0.99923277 | 0.00077265  |
| 1989 | DB01184 | 0.9992337  | 0.00076625  |
| 1990 | DB11859 | 0.9992347  | 0.000765363 |
| 1991 | DB01088 | 0.99924207 | 0.000757936 |
| 1992 | DB00313 | 0.9992422  | 0.000757873 |
| 1993 | DB13153 | 0.99924266 | 0.000757376 |
| 1994 | DB09322 | 0.999243   | 0.000757034 |
| 1995 | DB11219 | 0.999244   | 0.000756042 |
| 1996 | DB06204 | 0.9992638  | 0.000736146 |
| 1997 | DB01452 | 0.9992786  | 0.00072143  |
| 1998 | DB00190 | 0.9992791  | 0.000720948 |
| 1999 | DB00689 | 0.9992828  | 0.000717266 |
| 2000 | DB11331 | 0.9992893  | 0.000710651 |
| 2001 | DB02513 | 0.9993024  | 0.000697602 |
| 2002 | DB13824 | 0.9993106  | 0.000695903 |
| 2003 | DB01124 | 0.99930584 | 0.000694121 |
| 2004 | DB06757 | 0.9993098  | 0.000690188 |
| 2005 | DB00523 | 0.9993117  | 0.000688293 |
| 2006 | DB00308 | 0.999315   | 0.00068499  |
| 2007 | DB14183 | 0.9993156  | 0.000684434 |
| 2008 | DB00373 | 0.99932003 | 0.000680035 |
| 2009 | DB11560 | 0.99932086 | 0.000679104 |
| 2010 | DB06152 | 0.9993211  | 0.000678876 |
| 2011 | DB11799 | 0.9993212  | 0.00067877  |
| 2012 | DB01366 | 0.9993292  | 0.000670871 |
| 2013 | DB03216 | 0.99932945 | 0.000670544 |
| 2014 | DB12877 | 0.999331   | 0.000668999 |
| 2015 | DB01238 | 0.99933416 | 0.000665831 |
| 2016 | DB12792 | 0.99934536 | 0.000654619 |
| 2017 | DB09082 | 0.99934727 | 0.000652705 |
| 2018 | DB11186 | 0.99935716 | 0.000642835 |
| 2019 | DB00859 | 0.9993625  | 0.000638351 |
| 2020 | DB00351 | 0.9993648  | 0.000635197 |
| 2021 | DB00603 | 0.99936694 | 0.000633111 |
| 2022 | DB08933 | 0.99937075 | 0.000629327 |
| 2023 | DB04871 | 0.9993774  | 0.000622994 |
| 2024 | DB11822 | 0.9993785  | 0.000622123 |
| 2025 | DB00698 | 0.9993797  | 0.000622015 |
| 2026 | DB01185 | 0.9993849  | 0.000615091 |
| 2027 | DB00624 | 0.9993851  | 0.000614808 |
| 2028 | DB09498 | 0.99938536 | 0.000614619 |
| 2029 | DB00777 | 0.9993868  | 0.000613394 |
| 2030 | DB08941 | 0.99938715 | 0.000612803 |
| 2031 | DB00396 | 0.9993882  | 0.000611765 |
| 2032 | DB00235 | 0.9993963  | 0.000603694 |
| 2033 | DB01095 | 0.99940264 | 0.000597307 |
| 2034 | DB13987 | 0.99940515 | 0.000594914 |
| 2035 | DB14530 | 0.9994112  | 0.000588828 |
| 2036 | DB06212 | 0.99941385 | 0.000586123 |
| 2037 | DB00475 | 0.9994179  | 0.000582064 |
| 2038 | DB09484 | 0.9994266  | 0.000573436 |
| 2039 | DB00682 | 0.9994307  | 0.000569234 |
| 2040 | DB09448 | 0.9994335  | 0.000566569 |
| 2041 | DB09134 | 0.99944454 | 0.000555482 |
| 2042 | DB00250 | 0.99944526 | 0.000554704 |
| 2043 | DB02925 | 0.999451   | 0.000549012 |
| 2044 | DB14196 | 0.9994566  | 0.000543359 |
| 2045 | DB11343 | 0.99945885 | 0.000541132 |
| 2046 | DB01386 | 0.99946135 | 0.000538895 |
| 2047 | DB15480 | 0.9994647  | 0.000535303 |
| 2048 | DB08946 | 0.99947184 | 0.000528125 |
| 2049 | DB14199 | 0.99947196 | 0.000528004 |
| 2050 | DB14655 | 0.99947613 | 0.000523933 |
| 2051 | DB10396 | 0.99947688 | 0.000523292 |
| 2052 | DB00821 | 0.9994825  | 0.000517488 |
| 2053 | DB01138 | 0.9994887  | 0.000511235 |
| 2054 | DB06325 | 0.9994899  | 0.000510112 |
| 2055 | DB09555 | 0.99949145 | 0.000508493 |
| 2056 | DB14550 | 0.9995004  | 0.000499545 |
| 2057 | DB00244 | 0.9995096  | 0.000494021 |
| 2058 | DB00481 | 0.99950683 | 0.000493196 |
| 2059 | DB11817 | 0.9995116  | 0.000488449 |
| 2060 | DB00566 | 0.99951196 | 0.000488036 |
| 2061 | DB01237 | 0.9995171  | 0.000482911 |
| 2062 | DB00295 | 0.9995254  | 0.000474699 |
| 2063 | DB00191 | 0.99952674 | 0.000473242 |
| 2064 | DB01059 | 0.9995285  | 0.000471452 |
| 2065 | DB14206 | 0.9995301  | 0.000469889 |
| 2066 | DB04864 | 0.9995314  | 0.000468646 |
| 2067 | DB11200 | 0.99953234 | 0.000467523 |
| 2068 | DB06531 | 0.9995339  | 0.000465152 |
| 2069 | DB01137 | 0.9995409  | 0.000459105 |
| 2070 | DB07776 | 0.99954236 | 0.000457662 |

|      |          |            |             |
|------|----------|------------|-------------|
| 2071 | DB00792  | 0.9995427  | 0.00043789  |
| 2072 | DB00185  | 0.9995436  | 0.00043534  |
| 2073 | DB00810  | 0.9995404  | 0.00045092  |
| 2074 | DB12993  | 0.9995479  | 0.000452034 |
| 2075 | DB01616  | 0.99955004 | 0.000449935 |
| 2076 | DB01209  | 0.9995511  | 0.000448883 |
| 2077 | DB00421  | 0.9995542  | 0.00045768  |
| 2078 | DB01122  | 0.99955827 | 0.000441137 |
| 2079 | DB01581  | 0.9995621  | 0.000437847 |
| 2080 | DB01036  | 0.99956757 | 0.000432428 |
| 2081 | DB06707  | 0.99956757 | 0.000432416 |
| 2082 | DB00968  | 0.99957114 | 0.000428805 |
| 2083 | DB11768  | 0.9995714  | 0.000428644 |
| 2084 | DB00195  | 0.99957887 | 0.00042311  |
| 2085 | DB00540  | 0.9995795  | 0.000420484 |
| 2086 | DB13972  | 0.99957997 | 0.000420049 |
| 2087 | DB00609  | 0.999587   | 0.000412957 |
| 2088 | DB05770  | 0.99960536 | 0.000394672 |
| 2089 | DB11136  | 0.9996086  | 0.000391461 |
| 2090 | DB00985  | 0.99961036 | 0.000389716 |
| 2091 | DB00455  | 0.9996106  | 0.000389451 |
| 2092 | DB13257  | 0.99961793 | 0.000382008 |
| 2093 | DB08815  | 0.99961805 | 0.000381947 |
| 2094 | DB12015  | 0.99962103 | 0.000378995 |
| 2095 | DB00324  | 0.9996251  | 0.000374856 |
| 2096 | DB001019 | 0.99963105 | 0.000368885 |
| 2097 | DB09413  | 0.99963534 | 0.000364633 |
| 2098 | DB01165  | 0.99963546 | 0.000364563 |
| 2099 | DB11346  | 0.9996363  | 0.000363708 |
| 2100 | DB06267  | 0.99963677 | 0.000363193 |
| 2101 | DB00129  | 0.9996394  | 0.00036056  |
| 2102 | DB04574  | 0.99964225 | 0.000357699 |
| 2103 | DB01626  | 0.9996438  | 0.000356149 |
| 2104 | DB00771  | 0.99964404 | 0.000355895 |
| 2105 | DB11124  | 0.99964414 | 0.000352883 |
| 2106 | DB00461  | 0.9996482  | 0.000351746 |
| 2107 | DB01155  | 0.99965477 | 0.000345248 |
| 2108 | DB00661  | 0.99965477 | 0.000345205 |
| 2109 | DB01322  | 0.99965537 | 0.000344618 |
| 2110 | DB04572  | 0.9996575  | 0.000342549 |
| 2111 | DB01060  | 0.99965775 | 0.000342306 |
| 2112 | DB13848  | 0.999658   | 0.000341959 |
| 2113 | DB06709  | 0.9996587  | 0.000341301 |
| 2114 | DB13216  | 0.9996663  | 0.00033699  |
| 2115 | DB11282  | 0.9996637  | 0.000336336 |
| 2116 | DB01593  | 0.99966645 | 0.00033335  |
| 2117 | DB00778  | 0.9996675  | 0.000332331 |
| 2118 | DB05154  | 0.9996681  | 0.000331904 |
| 2119 | DB11150  | 0.9996687  | 0.000331323 |
| 2120 | DB02959  | 0.9996717  | 0.000328266 |
| 2121 | DB08887  | 0.99967196 | 0.000325504 |
| 2122 | DB05219  | 0.9996719  | 0.000325144 |
| 2123 | DB04920  | 0.9996768  | 0.000323182 |
| 2124 | DB13960  | 0.99967825 | 0.00032174  |
| 2125 | DB09091  | 0.9996848  | 0.000315213 |
| 2126 | DB09053  | 0.9996892  | 0.000310755 |
| 2127 | DB12867  | 0.9996897  | 0.000310374 |
| 2128 | DB00447  | 0.9996942  | 0.000305821 |
| 2129 | DB01324  | 0.9996952  | 0.000304902 |
| 2130 | DB13166  | 0.9996952  | 0.00030486  |
| 2131 | DB14574  | 0.9996972  | 0.000302848 |
| 2132 | DB001217 | 0.99969757 | 0.000302463 |
| 2133 | DB11079  | 0.99969894 | 0.000301926 |
| 2134 | DB01382  | 0.9996991  | 0.000300931 |
| 2135 | DB00755  | 0.99969923 | 0.00030079  |
| 2136 | DB00461  | 0.99969983 | 0.000300142 |
| 2137 | DB00547  | 0.99970156 | 0.00029842  |
| 2138 | DB09128  | 0.99970607 | 0.000296028 |
| 2139 | DB00986  | 0.9997104  | 0.000293573 |
| 2140 | DB00141  | 0.9997123  | 0.000292765 |
| 2141 | DB00198  | 0.99971586 | 0.000284068 |
| 2142 | DB00708  | 0.99971634 | 0.000283667 |
| 2143 | DB00972  | 0.9997186  | 0.000281334 |
| 2144 | DB01437  | 0.99972155 | 0.000277414 |
| 2145 | DB08816  | 0.9997296  | 0.00027037  |
| 2146 | DB14180  | 0.9997334  | 0.000266621 |
| 2147 | DB00721  | 0.9997379  | 0.000262611 |
| 2148 | DB12371  | 0.9997434  | 0.000256587 |
| 2149 | DB00753  | 0.999744   | 0.000256007 |
| 2150 | DB02370  | 0.9997445  | 0.000255371 |
| 2151 | DB00978  | 0.9997446  | 0.000255371 |
| 2152 | DB09073  | 0.9997451  | 0.000254979 |
| 2153 | DB00634  | 0.99975806 | 0.000241926 |
| 2154 | DB01069  | 0.9997603  | 0.000239828 |
| 2155 | DB00949  | 0.9997614  | 0.000238389 |
| 2156 | DB01210  | 0.99977225 | 0.000227729 |
| 2157 | DB01345  | 0.9997738  | 0.000226241 |
| 2158 | DB01218  | 0.99977547 | 0.000224519 |
| 2159 | DB00433  | 0.9997756  | 0.000224458 |
| 2160 | DB13228  | 0.99977696 | 0.00022333  |
| 2161 | DB00298  | 0.9997774  | 0.000222636 |
| 2162 | DB09543  | 0.9997794  | 0.000220636 |
| 2163 | DB00870  | 0.9997795  | 0.000220531 |
| 2164 | DB00984  | 0.99978155 | 0.000218444 |
| 2165 | DB00984  | 0.999782   | 0.000217577 |
| 2166 | DB11137  | 0.9997824  | 0.000217628 |
| 2167 | DB00653  | 0.9997873  | 0.000212727 |
| 2168 | DB00652  | 0.9997873  | 0.000212709 |
| 2169 | DB00810  | 0.9997881  | 0.000211952 |
| 2170 | DB09110  | 0.9997893  | 0.000210754 |
| 2171 | DB12710  | 0.9997899  | 0.000210126 |
| 2172 | DB02243  | 0.99979    | 0.000209657 |
| 2173 | DB14487  | 0.9997904  | 0.000209675 |
| 2174 | DB00161  | 0.99979144 | 0.000208517 |
| 2175 | DB13259  | 0.9997931  | 0.000206919 |
| 2176 | DB01638  | 0.99979573 | 0.000204305 |
| 2177 | DB00351  | 0.999796   | 0.000204089 |
| 2178 | DB00462  | 0.99979633 | 0.000203657 |
| 2179 | DB00257  | 0.9997999  | 0.000200135 |
| 2180 | DB13909  | 0.9998035  | 0.000196321 |
| 2181 | DB00857  | 0.99980444 | 0.000195563 |
| 2182 | DB09693  | 0.9998049  | 0.000195123 |
| 2183 | DB02272  | 0.99981195 | 0.00018805  |
| 2184 | DB00150  | 0.99981326 | 0.000186825 |
| 2185 | DB13882  | 0.9998135  | 0.000186475 |
| 2186 | DB12377  | 0.99981683 | 0.000183242 |
| 2187 | DB09155  | 0.99982005 | 0.000179977 |
| 2188 | DB01007  | 0.99982175 | 0.000176284 |
| 2189 | DB01231  | 0.99982446 | 0.000175553 |
| 2190 | DB13813  | 0.9998246  | 0.000175448 |
| 2191 | DB09219  | 0.9998252  | 0.000174906 |
| 2192 | DB00611  | 0.99982625 | 0.000173792 |
| 2193 | DB01164  | 0.99982685 | 0.000173172 |
| 2194 | DB01091  | 0.9998274  | 0.000172897 |
| 2195 | DB09157  | 0.999828   | 0.00017195  |
| 2196 | DB01125  | 0.99982953 | 0.00017046  |
| 2197 | DB00717  | 0.9998323  | 0.000167686 |
| 2198 | DB00808  | 0.9998324  | 0.000167157 |
| 2199 | DB00417  | 0.99983466 | 0.000165266 |
| 2200 | DB02315  | 0.99984    | 0.00015998  |
| 2201 | DB11156  | 0.9998423  | 0.000157736 |
| 2202 | DB13154  | 0.99984324 | 0.000156704 |
| 2203 | DB11159  | 0.9998441  | 0.000155948 |
| 2204 | DB01283  | 0.9998443  | 0.000155716 |
| 2205 | DB00290  | 0.9998455  | 0.000154848 |
| 2206 | DB00850  | 0.99984884 | 0.000151131 |
| 2207 | DB01159  | 0.99984956 | 0.000150414 |
| 2208 | DB00692  | 0.9998497  | 0.000150303 |
| 2209 | DB04443  | 0.9998499  | 0.000150034 |
| 2210 | DB00356  | 0.9998504  | 0.000149468 |
| 2211 | DB00365  | 0.99985075 | 0.000149266 |
| 2212 | DB00788  | 0.99985766 | 0.000142299 |



|      |          |            |             |
|------|----------|------------|-------------|
| 2213 | DB00132  | 0.99985814 | 0.000141783 |
| 2214 | DB08841  | 0.9998583  | 0.00014143  |
| 2215 | DB09496  | 0.99985845 | 0.00014149  |
| 2216 | DB11092  | 0.99986076 | 0.000139193 |
| 2217 | DB09350  | 0.999863   | 0.000136972 |
| 2218 | DB01420  | 0.9998667  | 0.000133262 |
| 2219 | DB01025  | 0.9998671  | 0.000132857 |
| 2220 | DB01348  | 0.9998677  | 0.000132355 |
| 2221 | DB00356  | 0.9998691  | 0.00013091  |
| 2222 | DB04825  | 0.99986947 | 0.000130302 |
| 2223 | DB00872  | 0.9998734  | 0.000126807 |
| 2224 | DB01205  | 0.9998758  | 0.000124152 |
| 2225 | DB04356  | 0.9998764  | 0.000123506 |
| 2226 | DB11132  | 0.999877   | 0.000123002 |
| 2227 | DB04908  | 0.9998789  | 0.000121072 |
| 2228 | DB14583  | 0.9998795  | 0.00012054  |
| 2229 | DB11589  | 0.99988246 | 0.000117472 |
| 2230 | DB00525  | 0.999884   | 0.000115963 |
| 2231 | DB11151  | 0.99988425 | 0.000115702 |
| 2232 | DB00193  | 0.9998859  | 0.000114015 |
| 2233 | DB01189  | 0.9998877  | 0.000112303 |
| 2234 | DB00931  | 0.9998878  | 0.000112158 |
| 2235 | DB04841  | 0.9998878  | 0.000112133 |
| 2236 | DB13076  | 0.9998885  | 0.000108552 |
| 2237 | DB00202  | 0.9998885  | 0.000108498 |
| 2238 | DB09330  | 0.99988973 | 0.00010251  |
| 2239 | DB00219  | 0.999892   | 0.000107869 |
| 2240 | DB00937  | 0.99989426 | 0.000105675 |
| 2241 | DB09335  | 0.999897   | 0.000103027 |
| 2242 | DB11632  | 0.9998974  | 0.00010278  |
| 2243 | DB00571  | 0.99989724 | 0.000102713 |
| 2244 | DB00855  | 0.9998981  | 0.00010197  |
| 2245 | DB01151  | 0.9998983  | 0.000101723 |
| 2246 | DB00281  | 0.9999013  | 9.87E-05    |
| 2247 | DB005057 | 0.9999026  | 9.74E-05    |
| 2248 | DB00411  | 0.99990444 | 9.63E-05    |
| 2249 | DB01783  | 0.99990654 | 9.34E-05    |
| 2250 | DB01108  | 0.9999068  | 9.32E-05    |
| 2251 | DB12713  | 0.99990726 | 9.27E-05    |
| 2252 | DB14784  | 0.9999081  | 9.19E-05    |
| 2253 | DB13467  | 0.99991345 | 8.63E-05    |
| 2254 | DB13982  | 0.999918   | 8.20E-05    |
| 2255 | DB14141  | 0.99991905 | 8.09E-05    |
| 2256 | DB00902  | 0.9999201  | 7.99E-05    |
| 2257 | DB09131  | 0.99992144 | 7.85E-05    |
| 2258 | DB13971  | 0.9999219  | 7.81E-05    |
| 2259 | DB09119  | 0.99992385 | 7.41E-05    |
| 2260 | DB09472  | 0.99992657 | 7.35E-05    |
| 2261 | DB01096  | 0.99992704 | 7.29E-05    |
| 2262 | DB13235  | 0.99993026 | 6.98E-05    |
| 2263 | DB00989  | 0.99993026 | 6.97E-05    |
| 2264 | DB00706  | 0.9999312  | 6.88E-05    |
| 2265 | DB00887  | 0.99993134 | 6.87E-05    |
| 2266 | DB00465  | 0.99993193 | 6.80E-05    |
| 2267 | DB01428  | 0.9999331  | 6.69E-05    |
| 2268 | DB06742  | 0.9999342  | 6.58E-05    |
| 2269 | DB00988  | 0.99993515 | 6.49E-05    |
| 2270 | DB00807  | 0.99993646 | 6.38E-05    |
| 2271 | DB11135  | 0.99993753 | 6.24E-05    |
| 2272 | DB01221  | 0.99994016 | 5.98E-05    |
| 2273 | DB12965  | 0.9999403  | 5.97E-05    |
| 2274 | DB14020  | 0.99994063 | 5.93E-05    |
| 2275 | DB11136  | 0.99994075 | 5.93E-05    |
| 2276 | DB00205  | 0.99994123 | 5.88E-05    |
| 2277 | DB00489  | 0.99994195 | 5.80E-05    |
| 2278 | DB09185  | 0.9999422  | 5.78E-05    |
| 2279 | DB04918  | 0.9999428  | 5.72E-05    |
| 2280 | DB04940  | 0.9999441  | 5.58E-05    |
| 2281 | DB11140  | 0.9999442  | 5.58E-05    |
| 2282 | DB09130  | 0.9999442  | 5.58E-05    |
| 2283 | DB08604  | 0.9999447  | 5.53E-05    |
| 2284 | DB09479  | 0.99994576 | 5.42E-05    |
| 2285 | DB00883  | 0.9999461  | 5.38E-05    |
| 2286 | DB12728  | 0.9999467  | 5.33E-05    |
| 2287 | DB09064  | 0.9999473  | 5.29E-05    |
| 2288 | DB01288  | 0.9999478  | 5.22E-05    |
| 2289 | DB00876  | 0.9999479  | 5.20E-05    |
| 2290 | DB13288  | 0.9999485  | 5.15E-05    |
| 2291 | DB00971  | 0.99994946 | 5.05E-05    |
| 2292 | DB00737  | 0.9999496  | 5.03E-05    |
| 2293 | DB06702  | 0.99995077 | 4.92E-05    |
| 2294 | DB06708  | 0.99995124 | 4.88E-05    |
| 2295 | DB15679  | 0.99995136 | 4.87E-05    |
| 2296 | DB04822  | 0.9999521  | 4.79E-05    |
| 2297 | DB01656  | 0.9999522  | 4.78E-05    |
| 2298 | DB01029  | 0.99995255 | 4.74E-05    |
| 2299 | DB00476  | 0.99995315 | 4.68E-05    |
| 2300 | DB00537  | 0.99995494 | 4.51E-05    |
| 2301 | DB00215  | 0.9999553  | 4.46E-05    |
| 2302 | DB14188  | 0.9999553  | 4.46E-05    |
| 2303 | DB04826  | 0.9999559  | 4.41E-05    |
| 2304 | DB00695  | 0.9999567  | 4.33E-05    |
| 2305 | DB04827  | 0.99995685 | 4.32E-05    |
| 2306 | DB00208  | 0.9999579  | 4.21E-05    |
| 2307 | DB00258  | 0.99995875 | 4.12E-05    |
| 2308 | DB01035  | 0.9999591  | 4.08E-05    |
| 2309 | DB04833  | 0.99995947 | 4.05E-05    |
| 2310 | DB14176  | 0.9999598  | 4.02E-05    |
| 2311 | DB06448  | 0.99995995 | 4.01E-05    |
| 2312 | DB00544  | 0.99996173 | 3.82E-05    |
| 2313 | DB00965  | 0.9999621  | 3.79E-05    |
| 2314 | DB01173  | 0.9999622  | 3.78E-05    |
| 2315 | DB06201  | 0.99996376 | 3.62E-05    |
| 2316 | DB00376  | 0.9999641  | 3.58E-05    |
| 2317 | DB00670  | 0.9999652  | 3.48E-05    |
| 2318 | DB14502  | 0.9999659  | 3.41E-05    |
| 2319 | DB00988  | 0.99996626 | 3.38E-05    |
| 2320 | DB00751  | 0.999967   | 3.20E-05    |
| 2321 | DB00408  | 0.9999676  | 3.25E-05    |
| 2322 | DB13747  | 0.9999682  | 3.19E-05    |
| 2323 | DB00865  | 0.999969   | 3.10E-05    |
| 2324 | DB09410  | 0.9999695  | 3.05E-05    |
| 2325 | DB01571  | 0.9999697  | 3.03E-05    |
| 2326 | DB00106  | 0.99996996 | 3.01E-05    |
| 2327 | DB01001  | 0.99996996 | 3.00E-05    |
| 2328 | DB13346  | 0.9999702  | 2.98E-05    |
| 2329 | DB00932  | 0.9999702  | 2.98E-05    |
| 2330 | DB00938  | 0.9999702  | 2.98E-05    |
| 2331 | DB00648  | 0.99997044 | 2.96E-05    |
| 2332 | DB14638  | 0.99997187 | 2.81E-05    |
| 2333 | DB12364  | 0.99997187 | 2.81E-05    |
| 2334 | DB08907  | 0.99997246 | 2.76E-05    |
| 2335 | DB00155  | 0.99997306 | 2.69E-05    |
| 2336 | DB14650  | 0.99997354 | 2.63E-05    |
| 2337 | DB00197  | 0.99997437 | 2.57E-05    |
| 2338 | DB009278 | 0.99997497 | 2.50E-05    |
| 2339 | DB09355  | 0.99997544 | 2.45E-05    |
| 2340 | DB04854  | 0.99997596 | 2.43E-05    |
| 2341 | DB09546  | 0.99997596 | 2.44E-05    |
| 2342 | DB13256  | 0.9999759  | 2.41E-05    |
| 2343 | DB11629  | 0.9999763  | 2.37E-05    |
| 2344 | DB00264  | 0.9999776  | 2.25E-05    |
| 2345 | DB00472  | 0.9999784  | 2.16E-05    |
| 2346 | DB13853  | 0.9999807  | 1.93E-05    |
| 2347 | DB14191  | 0.9999807  | 1.93E-05    |
| 2348 | DB13155  | 0.999982   | 1.80E-05    |
| 2349 | DB00451  | 0.99998224 | 1.78E-05    |
| 2350 | DB00996  | 0.9999825  | 1.75E-05    |
| 2351 | DB13953  | 0.9999825  | 1.75E-05    |
| 2352 | DB00393  | 0.9999831  | 1.69E-05    |
| 2353 | DB00166  | 0.9999838  | 1.62E-05    |
| 2354 | DB11226  | 0.99998415 | 1.59E-05    |

|      |         |            |          |
|------|---------|------------|----------|
| 2355 | DB00787 | 0.9999845  | 1.55E-05 |
| 2356 | DB14120 | 0.9999846  | 1.54E-05 |
| 2357 | DB09357 | 0.9999846  | 1.54E-05 |
| 2358 | DB08943 | 0.999985   | 1.51E-05 |
| 2359 | DB00508 | 0.99998546 | 1.46E-05 |
| 2360 | DB00942 | 0.9999857  | 1.43E-05 |
| 2361 | DB00574 | 0.99998593 | 1.41E-05 |
| 2362 | DB01235 | 0.99998605 | 1.40E-05 |
| 2363 | DB00358 | 0.99998605 | 1.40E-05 |
| 2364 | DB00744 | 0.9999862  | 1.38E-05 |
| 2365 | DB00233 | 0.9999863  | 1.37E-05 |
| 2366 | DB06228 | 0.9999864  | 1.35E-05 |
| 2367 | DB09414 | 0.9999867  | 1.33E-05 |
| 2368 | DB04948 | 0.9999877  | 1.32E-05 |
| 2369 | DB15576 | 0.9999869  | 1.31E-05 |
| 2370 | DB09449 | 0.9999871  | 1.29E-05 |
| 2371 | DB13117 | 0.99998724 | 1.28E-05 |
| 2372 | DB00922 | 0.9999875  | 1.26E-05 |
| 2373 | DB01070 | 0.9999876  | 1.24E-05 |
| 2374 | DB00586 | 0.99998784 | 1.21E-05 |
| 2375 | DB00741 | 0.99998796 | 1.20E-05 |
| 2376 | DB05271 | 0.9999883  | 1.17E-05 |
| 2377 | DB01031 | 0.99998856 | 1.14E-05 |
| 2378 | DB11254 | 0.9999887  | 1.14E-05 |
| 2379 | DB09407 | 0.9999887  | 1.13E-05 |
| 2380 | DB11328 | 0.9999888  | 1.12E-05 |
| 2381 | DB00368 | 0.99998975 | 1.03E-05 |
| 2382 | DB00874 | 0.99998987 | 1.01E-05 |
| 2383 | DB01370 | 0.99999    | 1.00E-05 |
| 2384 | DB11064 | 0.99999    | 9.97E-06 |
| 2385 | DB00348 | 0.9999901  | 9.93E-06 |
| 2386 | DB06736 | 0.99999034 | 9.70E-06 |
| 2387 | DB00860 | 0.99999094 | 9.08E-06 |
| 2388 | DB13277 | 0.99999106 | 8.96E-06 |
| 2389 | DB02362 | 0.99999106 | 8.95E-06 |
| 2390 | DB00752 | 0.99999213 | 7.80E-06 |
| 2391 | DB00425 | 0.9999924  | 7.66E-06 |
| 2392 | DB06771 | 0.9999926  | 7.40E-06 |
| 2393 | DB01175 | 0.9999926  | 7.38E-06 |
| 2394 | DB11071 | 0.99999285 | 7.11E-06 |
| 2395 | DB12982 | 0.9999936  | 6.47E-06 |
| 2396 | DB01063 | 0.99999356 | 6.45E-06 |
| 2397 | DB14084 | 0.9999937  | 6.31E-06 |
| 2398 | DB13278 | 0.9999938  | 6.22E-06 |
| 2399 | DB00519 | 0.99999404 | 5.99E-06 |
| 2400 | DB04794 | 0.99999404 | 5.98E-06 |
| 2401 | DB13501 | 0.99999404 | 5.93E-06 |
| 2402 | DB00509 | 0.99999404 | 5.92E-06 |
| 2403 | DB01064 | 0.99999404 | 5.92E-06 |
| 2404 | DB00635 | 0.99999416 | 5.82E-06 |
| 2405 | DB00366 | 0.99999416 | 5.82E-06 |
| 2406 | DB00228 | 0.9999944  | 5.81E-06 |
| 2407 | DB01073 | 0.9999944  | 5.59E-06 |
| 2408 | DB09490 | 0.9999944  | 5.56E-06 |
| 2409 | DB09516 | 0.9999944  | 5.55E-06 |
| 2410 | DB00289 | 0.99999464 | 5.41E-06 |
| 2411 | DB00654 | 0.99999464 | 5.33E-06 |
| 2412 | DB14783 | 0.99999464 | 5.32E-06 |
| 2413 | DB00502 | 0.999995   | 5.03E-06 |
| 2414 | DB00473 | 0.9999951  | 4.86E-06 |
| 2415 | DB00226 | 0.99999535 | 4.68E-06 |
| 2416 | DB01250 | 0.99999547 | 4.50E-06 |
| 2417 | DB01062 | 0.9999957  | 4.24E-06 |
| 2418 | DB01191 | 0.9999958  | 4.15E-06 |
| 2419 | DB00986 | 0.9999962  | 3.76E-06 |
| 2420 | DB06210 | 0.9999963  | 3.75E-06 |
| 2421 | DB06804 | 0.9999963  | 3.70E-06 |
| 2422 | DB11448 | 0.9999964  | 3.62E-06 |
| 2423 | DB09117 | 0.9999964  | 3.50E-06 |
| 2424 | DB06718 | 0.99999666 | 3.37E-06 |
| 2425 | DB06802 | 0.99999666 | 3.30E-06 |
| 2426 | DB00759 | 0.99999666 | 3.28E-06 |
| 2427 | DB01280 | 0.9999968  | 3.19E-06 |
| 2428 | DB11062 | 0.999997   | 2.96E-06 |
| 2429 | DB03352 | 0.99999714 | 2.81E-06 |
| 2430 | DB00500 | 0.99999726 | 2.69E-06 |
| 2431 | DB00499 | 0.9999975  | 2.53E-06 |
| 2432 | DB00657 | 0.9999975  | 2.50E-06 |
| 2433 | DB13248 | 0.9999976  | 2.43E-06 |
| 2434 | DB01325 | 0.9999976  | 2.42E-06 |
| 2435 | DB00580 | 0.9999976  | 2.33E-06 |
| 2436 | DB09205 | 0.9999981  | 1.96E-06 |
| 2437 | DB00963 | 0.9999981  | 1.94E-06 |
| 2438 | DB11323 | 0.9999981  | 1.86E-06 |
| 2439 | DB11257 | 0.9999982  | 1.76E-06 |
| 2440 | DB00765 | 0.9999982  | 1.73E-06 |
| 2441 | DB09153 | 0.99999845 | 1.51E-06 |
| 2442 | DB00230 | 0.99999857 | 1.40E-06 |
| 2443 | DB00758 | 0.99999857 | 1.39E-06 |
| 2444 | DB00533 | 0.9999987  | 1.39E-06 |
| 2445 | DB11115 | 0.9999987  | 1.37E-06 |
| 2446 | DB00482 | 0.9999987  | 1.27E-06 |
| 2447 | DB06700 | 0.9999988  | 1.24E-06 |
| 2448 | DB09378 | 0.9999988  | 1.19E-06 |
| 2449 | DB00715 | 0.9999988  | 1.14E-06 |
| 2450 | DB00888 | 0.9999989  | 1.12E-06 |
| 2451 | DB00966 | 0.9999989  | 1.05E-06 |
| 2452 | DB00379 | 0.99999905 | 1.01E-06 |
| 2453 | DB01235 | 0.99999905 | 9.26E-07 |
| 2454 | DB14212 | 0.99999917 | 8.76E-07 |
| 2455 | DB00605 | 0.99999917 | 8.69E-07 |
| 2456 | DB01418 | 0.99999917 | 8.33E-07 |
| 2457 | DB00959 | 0.99999917 | 8.16E-07 |
| 2458 | DB02300 | 0.99999917 | 8.00E-07 |
| 2459 | DB11644 | 0.9999993  | 6.96E-07 |
| 2460 | DB11096 | 0.9999993  | 6.58E-07 |
| 2461 | DB11610 | 0.9999994  | 5.72E-07 |
| 2462 | DB00973 | 0.9999995  | 4.55E-07 |
| 2463 | DB11081 | 0.99999964 | 3.20E-07 |
| 2464 | DB01086 | 0.99999964 | 3.17E-07 |
| 2465 | DB13116 | 0.99999964 | 3.02E-07 |
| 2466 | DB15916 | 0.99999976 | 2.93E-07 |
| 2467 | DB14177 | 0.99999976 | 2.87E-07 |
| 2468 | DB01609 | 0.99999976 | 2.47E-07 |
| 2469 | DB06795 | 0.99999976 | 2.40E-07 |
| 2470 | DB11387 | 0.99999976 | 2.08E-07 |
| 2471 | DB03754 | 0.99999976 | 2.05E-07 |
| 2472 | DB00600 | 0.99999976 | 1.92E-07 |
| 2473 | DB01600 | 0.9999999  | 1.77E-07 |
| 2474 | DB01110 | 0.9999999  | 1.74E-07 |
| 2475 | DB13628 | 0.9999999  | 1.67E-07 |
| 2476 | DB13219 | 0.9999999  | 1.48E-07 |
| 2477 | DB09096 | 0.9999999  | 1.34E-07 |
| 2478 | DB01380 | 0.9999999  | 9.78E-08 |
| 2479 | DB13583 | 0.9999999  | 8.88E-08 |
| 2480 | DB00856 | 0.9999999  | 7.89E-08 |
| 2481 | DB01127 | 0.9999999  | 7.71E-08 |
| 2482 | DB00804 | 0.9999999  | 7.16E-08 |
| 2483 | DB09041 | 0.9999999  | 6.97E-08 |
| 2484 | DB13910 | 1          | 5.84E-08 |
| 2485 | DB09216 | 1          | 4.71E-08 |
| 2486 | DB06729 | 1          | 3.80E-08 |
| 2487 | DB04813 | 1          | 3.72E-08 |
| 2488 | DB09084 | 1          | 3.49E-08 |
| 2489 | DB00292 | 1          | 3.28E-08 |
| 2490 | DB01115 | 1          | 2.46E-08 |
| 2491 | DB09225 | 1          | 2.10E-08 |
| 2492 | DB00861 | 1          | 1.55E-08 |
| 2493 | DB00299 | 1          | 1.47E-08 |
| 2494 | DB09881 | 1          | 1.45E-08 |
| 2495 | DB09366 | 1          | 1.37E-08 |
| 2496 | DB14517 | 1          | 1.23E-08 |

|      |         |   |          |
|------|---------|---|----------|
| 2497 | DB12211 | 1 | 1.21E-08 |
| 2498 | DB11160 | 1 | 5.63E-09 |
| 2499 | DB01359 | 1 | 5.10E-09 |
| 2500 | DB12300 | 1 | 1.41E-09 |
