# Supplementary material for: Accurate prediction of molecular properties and drug targets using a self-supervised image representation learning framework
Source: Springer Nature journal article supplement (doi:10.1038/s42256-022-00557-6), 2022-11-17
Supplement: 42256_2022_557_MOESM19_ESM.pdf [file 42256_2022_557_MOESM19_ESM.pdf]

**Table S25:** Virtual screening of 70 validated anti-SARS-CoV-2 small molecule drugs. DrugID corresponds to the drug id in DrugBank. non-inhibitor\_probs represents the probability of non-SARS-CoV-2 inhibitors. inhibitor\_probs represents the probability of SARS-CoV-2 inhibitors.

| DrugID  | non-inhibitor_probs | inhibitor_probs |
|---------|---------------------|-----------------|
| DB01078 | 1.88E-05            | 0.99998116      |
| DB11544 | 6.96E-05            | 0.9999305       |
| DB13467 | 7.81E-05            | 0.9999219       |
| DB00441 | 0.000127156         | 0.9998728       |
| DB06733 | 0.000423055         | 0.999577        |
| DB01396 | 0.000441887         | 0.99955815      |
| DB12167 | 0.001608472         | 0.99839145      |
| DB01933 | 0.002126772         | 0.9978732       |
| DB03172 | 0.002269188         | 0.9977308       |
| DB08860 | 0.002693576         | 0.99730647      |
| DB11925 | 0.003411441         | 0.9965886       |
| DB12008 | 0.004869224         | 0.9951308       |
| DB11836 | 0.00769462          | 0.99230534      |
| DB11963 | 0.007864516         | 0.9921355       |
| DB12731 | 0.010650054         | 0.9893499       |
| DB12980 | 0.01098805          | 0.9890119       |
| DB12191 | 0.016336948         | 0.9836631       |
| DB05424 | 0.017515251         | 0.98248476      |
| DB09274 | 0.018679384         | 0.98132056      |
| DB12180 | 0.026367793         | 0.9736322       |
| DB00773 | 0.030529208         | 0.9694708       |
| DB16228 | 0.06574645          | 0.93425363      |
| DB00220 | 0.0725568           | 0.9274432       |
| DB12387 | 0.07817044          | 0.9218295       |
| DB01667 | 0.085802235         | 0.91419774      |
| DB11432 | 0.089807265         | 0.91019267      |
| DB04865 | 0.090802744         | 0.90919733      |
| DB14761 | 0.10425286          | 0.8957471       |
| DB02587 | 0.11542233          | 0.88457763      |
| DB13393 | 0.12973516          | 0.8702648       |
| DB08437 | 0.13642898          | 0.86357105      |
| DB13729 | 0.14483973          | 0.85516036      |
| DB06469 | 0.17343509          | 0.8265649       |
| DB12774 | 0.18150604          | 0.81849396      |
| DB08916 | 0.19392926          | 0.80607074      |
| DB11617 | 0.24374713          | 0.7562529       |
| DB00276 | 0.2623714           | 0.73762864      |
| DB15686 | 0.3348823           | 0.6651177       |
| DB12598 | 0.37335983          | 0.62664014      |
| DB00352 | 0.39709035          | 0.6029097       |
| DB02010 | 0.4401818           | 0.5598182       |
| DB06061 | 0.48684037          | 0.51315963      |
| DB15408 | 0.5064007           | 0.49359924      |
| DB06816 | 0.5371333           | 0.4628667       |

|         |            |             |
|---------|------------|-------------|
| DB05239 | 0.68645936 | 0.31354067  |
| DB00630 | 0.8108554  | 0.18914457  |
| DB01033 | 0.8182946  | 0.1817054   |
| DB14904 | 0.8200117  | 0.17998832  |
| DB15254 | 0.8292575  | 0.17074253  |
| DB08142 | 0.9157889  | 0.08421114  |
| DB05983 | 0.96002465 | 0.039975315 |
| DB13536 | 0.968111   | 0.03188905  |
| DB12673 | 0.9783483  | 0.021651639 |
| DB01204 | 0.9814736  | 0.018526396 |
| DB12120 | 0.98246884 | 0.017531095 |
| DB12933 | 0.98937875 | 0.010621207 |
| DB12624 | 0.9905019  | 0.009498136 |
| DB05013 | 0.99586725 | 0.004132716 |
| DB03523 | 0.99608266 | 0.003917368 |
| DB00694 | 0.997431   | 0.002569054 |
| DB00439 | 0.9977557  | 0.002244335 |
| DB06810 | 0.99794656 | 0.002053446 |
| DB00993 | 0.9981153  | 0.001884712 |
| DB12114 | 0.9981482  | 0.00185186  |
| DB12241 | 0.9989208  | 0.001079185 |
| DB06442 | 0.99926716 | 0.000732864 |
| DB09053 | 0.9996747  | 0.000325358 |
| DB15661 | 0.9996815  | 0.000318544 |
| DB00482 | 0.9999987  | 1.28E-06    |
| DB01609 | 0.99999976 | 1.98E-07    |
