# Supplementary material for: Accurate prediction of molecular properties and drug targets using a self-supervised image representation learning framework
Source: Springer Nature journal article supplement (doi:10.1038/s42256-022-00557-6), 2022-11-17
Supplement: 42256_2022_557_MOESM20_ESM.pdf [file 42256_2022_557_MOESM20_ESM.pdf]

**Table S28:** Ablation results of data augmentation on benchmark datasets with ROC-AUC metric and random scaffold split. None means not to use any data augmentation. RandomHorizontalFlip, RandomGrayscale and RandomRotation represent data augmentation methods. All means using these three data augmentation methods. All results are reported as mean  $\pm$  standard deviation. Bold font indicates best result.

| Classification (Higher is better)    |                                   |                                   |                                   |                                   |                                   |                                   |
|--------------------------------------|-----------------------------------|-----------------------------------|-----------------------------------|-----------------------------------|-----------------------------------|-----------------------------------|
|                                      | BBBP                              | SIDER                             | clintox                           | BACE                              | Tox21                             | toxcast                           |
| None                                 | 0.903 $\pm$ 0.025                 | 0.618 $\pm$ 0.023                 | 0.488 $\pm$ 0.161                 | 0.838 $\pm$ 0.047                 | 0.809 $\pm$ 0.004                 | 0.692 $\pm$ 0.007                 |
| RandomHorizontalFlip                 | 0.903 $\pm$ 0.015                 | 0.605 $\pm$ 0.027                 | 0.409 $\pm$ 0.093                 | 0.820 $\pm$ 0.029                 | 0.819 $\pm$ 0.006                 | 0.697 $\pm$ 0.017                 |
| RandomGrayscale                      | 0.897 $\pm$ 0.027                 | 0.605 $\pm$ 0.011                 | 0.517 $\pm$ 0.155                 | 0.784 $\pm$ 0.021                 | 0.795 $\pm$ 0.009                 | 0.687 $\pm$ 0.009                 |
| RandomRotation                       | <b>0.954<math>\pm</math>0.010</b> | 0.706 $\pm$ 0.008                 | 0.904 $\pm$ 0.013                 | 0.930 $\pm$ 0.016                 | 0.823 $\pm$ 0.002                 | 0.739 $\pm$ 0.009                 |
| RandomHorizontalFlip+RandomGrayscale | 0.913 $\pm$ 0.016                 | 0.617 $\pm$ 0.010                 | 0.484 $\pm$ 0.102                 | 0.834 $\pm$ 0.028                 | 0.801 $\pm$ 0.010                 | 0.680 $\pm$ 0.004                 |
| RandomHorizontalFlip+RandomRotation  | 0.951 $\pm$ 0.006                 | 0.706 $\pm$ 0.010                 | 0.894 $\pm$ 0.019                 | 0.931 $\pm$ 0.012                 | 0.830 $\pm$ 0.008                 | 0.742 $\pm$ 0.011                 |
| RandomGrayscale+RandomRotation       | 0.942 $\pm$ 0.010                 | 0.706 $\pm$ 0.009                 | 0.936 $\pm$ 0.030                 | 0.933 $\pm$ 0.009                 | 0.828 $\pm$ 0.019                 | 0.740 $\pm$ 0.009                 |
| All                                  | 0.952 $\pm$ 0.002                 | <b>0.708<math>\pm</math>0.010</b> | <b>0.975<math>\pm</math>0.007</b> | <b>0.939<math>\pm</math>0.010</b> | <b>0.847<math>\pm</math>0.003</b> | <b>0.751<math>\pm</math>0.002</b> |
| Regression (Lower is better)         |                                   |                                   |                                   |                                   |                                   |                                   |
|                                      | FreeSolv                          | ESOL                              | Lipo                              | QM7                               |                                   |                                   |
| None                                 | 1.741 $\pm$ 0.117                 | 0.925 $\pm$ 0.050                 | 0.908 $\pm$ 0.015                 | 88.237 $\pm$ 1.600                |                                   |                                   |
| RandomHorizontalFlip                 | 1.551 $\pm$ 0.101                 | 0.766 $\pm$ 0.033                 | 0.907 $\pm$ 0.058                 | 87.547 $\pm$ 9.531                |                                   |                                   |
| RandomGrayscale                      | 1.592 $\pm$ 0.113                 | 1.005 $\pm$ 0.026                 | 0.943 $\pm$ 0.013                 | 93.779 $\pm$ 2.121                |                                   |                                   |
| RandomRotation                       | 1.655 $\pm$ 0.296                 | 0.722 $\pm$ 0.017                 | 0.630 $\pm$ 0.003                 | 73.567 $\pm$ 5.157                |                                   |                                   |
| RandomHorizontalFlip+RandomGrayscale | 2.140 $\pm$ 0.181                 | 1.001 $\pm$ 0.161                 | 0.895 $\pm$ 0.025                 | 84.998 $\pm$ 4.017                |                                   |                                   |
| RandomHorizontalFlip+RandomRotation  | 1.594 $\pm$ 0.242                 | 0.776 $\pm$ 0.030                 | 0.629 $\pm$ 0.008                 | 66.412 $\pm$ 6.028                |                                   |                                   |
| RandomGrayscale+RandomRotation       | 1.513 $\pm$ 0.306                 | <b>0.670<math>\pm</math>0.002</b> | 0.631 $\pm$ 0.010                 | 77.853 $\pm$ 6.500                |                                   |                                   |
| All                                  | <b>1.149<math>\pm</math>0.004</b> | 0.690 $\pm$ 0.003                 | <b>0.625<math>\pm</math>0.009</b> | <b>65.9<math>\pm</math>2.6</b>    |                                   |                                   |
