# Supplementary material for: Accurate prediction of molecular properties and drug targets using a self-supervised image representation learning framework
Source: Springer Nature journal article supplement (doi:10.1038/s42256-022-00557-6), 2022-11-17
Supplement: 42256_2022_557_MOESM21_ESM.pdf [file 42256_2022_557_MOESM21_ESM.pdf]

| <b>Hyperparameters</b> | <b>Classification</b> | <b>Regression</b> |
|------------------------|-----------------------|-------------------|
| Learning rate          | 0.0001~0.001          | 0.0001~0.001      |
| Learning rate decay    | 0.98~0.995            | 0.98~0.995        |
| Batch Size             | 8,16                  | 16,32             |
| Dropout ratio          | 0~0.5                 | 0~0.5             |
| Graph pooling          | set2set, collection   | set2set, mean     |
| Max Epochs             | 100                   | 100               |
| Learning Rate Decay    | Linear                | Linear            |

**Table S31 (a):** Hyperparameter optimization for MPG.

| <b>Hyperparameters</b>                     | <b>Fine-tuning</b> |
|--------------------------------------------|--------------------|
| Max learning rate                          | 0.0001~0.001       |
| Max Epochs                                 | 100                |
| Number of final learning                   | 2~5                |
| Batch Size                                 | 32                 |
| Dropout ratio                              | 0~0.2              |
| Self-attention layer                       | 4~8                |
| Dist coefficient                           | 0.05~0.15          |
| Dropout bond                               | 0~0.4              |
| Number of layers in FFN after MPN encoding | 3~5                |

**Table S31 (b):** Hyperparameter optimization for GROVER.

| <b>Hyperparameters</b> | <b>Fine-tuning</b> |
|------------------------|--------------------|
| Batch Size             | 8, 16, 32          |
| learning rate          | 0.00001~0.01       |

**Table S31 (c):** Hyperparameter optimization for X-MOL.

| <b>Hyperparameters</b>     | <b>Fine-tuning</b> |
|----------------------------|--------------------|
| Batch Size                 | 8, 16, 32          |
| Initial learning rate      | 1e-6~0.005         |
| Initial base learning rate | 1e-6~0.001         |

**Table S31 (d):** Hyperparameter optimization for MolCLR.

| <b>Hyperparameters</b> | <b>Fine-tuning</b> |
|------------------------|--------------------|
| Batch Size             | 8, 16, 32          |
| Initial learning rate  | 0.000001~0.01      |
| Max Epochs             | 100                |

**Table S31 (e):** Hyperparameter optimization for CHEM-BERT.

| <b>Hyperparameters</b>       | <b>Linear regression</b>   |
|------------------------------|----------------------------|
| Feature extraction           | Polynomial Features        |
| Degree                       | 1-10                       |
| <b>Hyperparameters</b>       |                            |
| <b>Hyperparameters</b>       | <b>Logistic regression</b> |
| Penalty                      | L1, L2                     |
| Intercept C                  | 1~10                       |
| Solver                       | liblinear                  |
| Maximum number of iterations | 100~10000                  |
| <b>Hyperparameters</b>       |                            |
| <b>Hyperparameters</b>       | <b>MLP</b>                 |
| Activation                   | RELU                       |
| Solver                       | Adam                       |
| Learning rate                | 0.0001~0.005               |
| Batch size                   | 8, 16, 32                  |
| Maximum number of iterations | 500-10000                  |

| <b>Hyperparameters</b> | <b>Random forest</b>                                    |
|------------------------|---------------------------------------------------------|
| Number of estimators   | 100~10000                                               |
| Criterion              | Gini, Entropy (classification)<br>MAE, MSE (regression) |

**Table S31 (f):** Hyperparameter optimization for SMILES\_Transformer.

| <b>Hyperparameters</b> | <b>Fine-tuning</b> |
|------------------------|--------------------|
| Batch Size             | 8, 16, 32, 64, 128 |
| Initial learning rate  | 0.0005~0.1         |

**Table S31 (g):** Hyperparameter optimization for Chemception, ADMET-CNN and QSAR-CNN.
